# Supplementary material for: RNA-binding protein CELF6 modulates transcription and splicing levels of genes associated with tumorigenesis in lung cancer A549 cells
Source: PeerJ journal article supplement (doi:10.7717/peerj.13800), 2022-07-26

**A**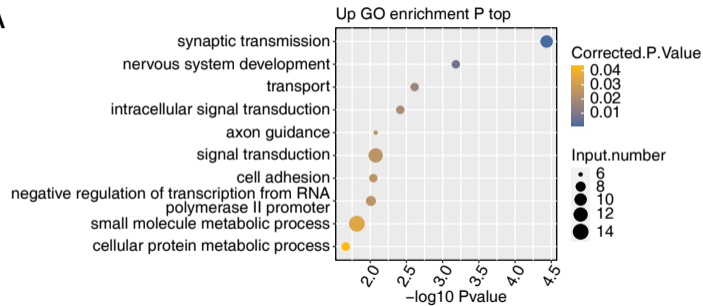**B**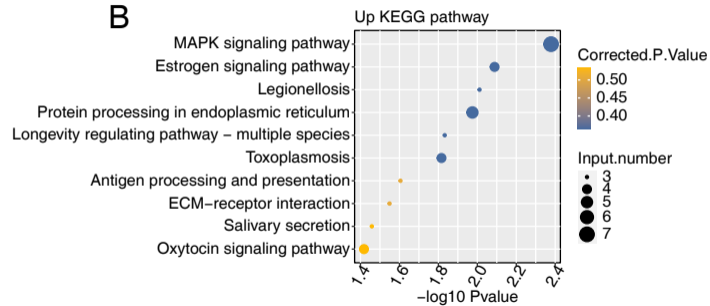

Supplement: figS2.pdf [file figS2.pdf]
