# Supplementary material for: RNA-binding protein CELF6 modulates transcription and splicing levels of genes associated with tumorigenesis in lung cancer A549 cells
Source: PubMed Central journal article supplement (PMC9336609; doi:10.7717/peerj.13800), 2022-07-26

A

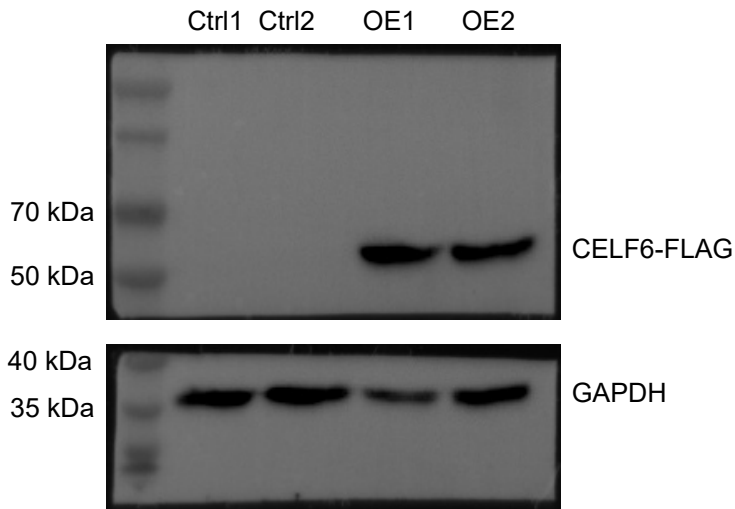

Supplement: peerj-10-13800-s001.pdf [file peerj-10-13800-s001.pdf]
