# Supplementary material for: RNA-binding protein CELF6 modulates transcription and splicing levels of genes associated with tumorigenesis in lung cancer A549 cells
Source: PeerJ. 2022 Jul 26;10:e13800. doi: 10.7717/peerj.13800 (PMC9336609; doi:10.7717/peerj.13800)
Supplement: Supplemental Information 4 [file peerj-10-13800-s004.xlsx]

## Sheet: Sheet1
BIRC3-F	TGGTGGTATGTGCCTGTAGTC
BIRC3-R	GAGAAATGTGTCCCTGGTGTTT
CCL20-F	GGACATAGCCCAAGAACAGAAA
CCL20-R	ACAAGTCCAGTGAGGCACAA
STAT1-F	TGGCGATAGCAATTACAATGGA
STAT1-R	AGTGAACACAGAAGAGTGACAT
TNFSF10-F	TTCTCTTGCCTCAGCCTCTC
TNFSF10-R	CACAGTAGTAGCCTCCAGGTT
MLKL -F	TGGTTCTTCTGGTCTTGATTGG
MLKL -R	GCTGGCACTGTGACTTGATT
JUNB -F	CAAGGTGAAGACGCTCAAGG
JUNB -R	CGGAGTCCAGTGTGGTTTG
MYD88 -F	GCTGCTTAAACTCACACAACAA
MYD88 -R	GGCACAGACACCTAAGACCAT
	Primers Information
CELF6-F	GCTCCGACACGCTCTACAAT
CELF6 -R	AGAGACAACGGCTCCAAAGG
GAPDH -F	GGTCGGAGTCAACGGATTTG
GAPDH -R	GGAAGATGGTGATGGGATTTC
	Primers Information
HSPA6 -F	TCACCACCTACTCGGACAAC
HSPA6 -R	TCACGCTCAGGATGCCATTA
CSF1 -F	GCCTTCTAGTCACAGCCTCTAT
CSF1 -R	CCTGCTCTGATGCCACCAA
HSPA1B -F	ACAAGTGTCAAGAGGTCATCTC
HSPA1B -R	CCTGGTACAGTCCGCTGAT
PIK3R2 -F	CTCAGGAGTGTTTGCTTCAAGT
PIK3R2 -R	CCAGTTGGTAAGTAGCAGGTG
CCL5-F	ACTTCCTTCCTGGTCACAGAG
CCL5 -R	TCCGTCACAACAACAACAACA
CD47-M/AS-F	TCCAAATCGGAGTCCATCAC
CD47-AS-R	CCCCTTAATGAATAACTGAA
CD47-M-R	ATGAATGATGAATAACTGAA
CD44-M-F	CCTGCTACCAATAGGAATGA
CD44-AS-F	ACATCAAGCAATAGGAATGA
CD44-M/AS -R	GGTCCTGCTTTCCTTCGTGT
FN1-M/AS-F	GCTGAACATTGGGTGGTGTC
FN1-AS-R	CAGTCCACAGCTATTCCTGC
FN1-M-R	GCAGTAACCACTATTCCTGC
SEC31A -M/AS-F	TTGGGTACTCTGTTCAAAGC
SEC31A -AS-R	ATGTTGGAAGGTCCTCAGAA
SEC31A -M-R	CAGCCACAGCGTCCTCAGAA
TP53-M-F	AGTCTGGCTGCCAATCCAGG
TP53-AS-F	TAAATGCCACCCAATCCAGG
TP53-M/AS -R	TAGAGCCACCGTCCAGGGAGCA
CASP8-M-F	TTCAGCAAAGGGGCTTTGAC
CASP8-AS-F	TTGGATGCAGGGGCTTTGAC
CASP8-M/AS -R	TCCTGTCCATCAGTGCCATA
BAX -M-F	GGGTGGTTGGGACGGCCTCC
BAX -AS-F	CTGTCTCCAGGACGGCCTCC
BAX -M/AS -R	CCTCAGCCCATCTTCTTCCA
