# Supplementary material for: RNA-binding protein CELF6 modulates transcription and splicing levels of genes associated with tumorigenesis in lung cancer A549 cells
Source: PeerJ. 2022 Jul 26;10:e13800. doi: 10.7717/peerj.13800 (PMC9336609; doi:10.7717/peerj.13800)
Supplement: Supplemental Information 5 [file peerj-10-13800-s005.xlsx]

## Sheet: DEG-BIRC3
ID	Sample Name	Ct	Ct ref	Ct mean	△ct(-)		2-△ct	2-△△ct	Sd	RQ1
1	NC-1	23.834	17.695	17.8023	-6.03167	2	0.0152858	1.02157	0.0617898	1	0.014963
		23.969	17.763		-6.16667		0.0139203	0.930316
		23.797	17.949		-5.99467		0.0156829	1.04811
2	NC-2	23.956	17.634	17.678	-6.278		0.0128865	0.861224	0.0119176	0.847462	0.0126806
		23.991	17.712		-6.313		0.0125776	0.840582
		23.991	17.688		-6.313		0.0125776	0.840582
3	NC-3	24.147	17.696	17.7057	-6.44133		0.0115071	0.769038	0.0308411	0.77712	0.011628
		24.181	17.687		-6.47533		0.0112391	0.751125
		24.07	17.734		-6.36433		0.0121379	0.811198
4	CELF6-1	25.197	17.906	17.9067	-7.29033		0.00638838	0.426946	0.0168952	0.441706	0.00660923
		25.16	17.859		-7.25333		0.00655434	0.438037
		25.089	17.955		-7.18233		0.00688497	0.460134
5	CELF6-2	24.755	17.75	17.741	-7.014		0.00773706	0.51708	0.0583414	0.552723	0.00827038
		24.744	17.699		-7.003		0.00779627	0.521038
		24.493	17.774		-6.752		0.00927781	0.620051
6	CELF6-3	24.577	17.734	17.7153	-6.86167		0.00859869	0.574665	0.0627667	0.554856	0.0083023
		24.823	17.657		-7.10767		0.00725068	0.484575
		24.502	17.755		-6.78667		0.00905752	0.605329

## Sheet: DEG-CCL20
ID	Sample Name	Ct	Ct ref	Ct mean	△ct(-)		2-△ct	2-△△ct	Sd	RQ1
1	NC-1	24.97	17.695	17.8023	-7.16767	2	0.00695533	0.961708	0.0370843	1	0.00723227
		24.863	17.763		-7.06067		0.00749078	1.03575
		24.91	17.949		-7.10767		0.00725069	1.00255
2	NC-2	24.962	17.634	17.678	-7.284		0.00641649	0.887203	0.0106332	0.876651	0.00634017
		24.979	17.712		-7.301		0.00634133	0.87681
		24.997	17.688		-7.319		0.0062627	0.865939
3	NC-3	24.886	17.696	17.7057	-7.18033		0.00689452	0.953301	0.0251601	0.924251	0.00668443
		24.953	17.687		-7.24733		0.00658166	0.910041
		24.954	17.734		-7.24833		0.00657709	0.90941
4	CELF6-1	26.466	17.906	17.9067	-8.55933		0.00265084	0.36653	0.0188553	0.365587	0.00264402
		26.399	17.859		-8.49233		0.00277685	0.383953
		26.548	17.955		-8.64133		0.00250437	0.346278
5	CELF6-2	26.04	17.75	17.741	-8.299		0.00317506	0.439013	0.0301288	0.421771	0.00305036
		26.222	17.699		-8.481		0.00279875	0.386981
		26.039	17.774		-8.298		0.00317726	0.439318
6	CELF6-3	25.97	17.734	17.7153	-8.25467		0.00327414	0.452713	0.0379915	0.418909	0.00302966
		26.231	17.657		-8.51567		0.0027323	0.377793
		26.057	17.755		-8.34167		0.00308254	0.42622

## Sheet: DEG-STAT1
ID	Sample Name	Ct	Ct ref	Ct mean	△ct(-)		2-△ct	2-△△ct	Sd	RQ1
1	NC-1	21.585	17.695	17.8023	-3.78267	2	0.0726615	0.998613	0.00240224	1	0.0727624
		21.585	17.763		-3.78267		0.0726615	0.998613
		21.579	17.949		-3.77667		0.0729642	1.00277
2	NC-2	21.586	17.634	17.678	-3.908		0.0666154	0.91552	0.0517315	0.909345	0.0661661
		21.685	17.712		-4.007		0.0621975	0.854803
		21.521	17.688		-3.843		0.0696854	0.957712
3	NC-3	21.708	17.696	17.7057	-4.00233		0.062399	0.857572	0.0186893	0.860485	0.062611
		21.67	17.687		-3.96433		0.0640644	0.88046
		21.732	17.734		-4.02633		0.0613695	0.843424
4	CELF6-1	22.852	17.906	17.9067	-4.94533		0.0324569	0.446067	0.00359448	0.443404	0.0322632
		22.856	17.859		-4.94933		0.032367	0.444831
		22.874	17.955		-4.96733		0.0319656	0.439316
5	CELF6-2	22.785	17.75	17.741	-5.044		0.0303113	0.416579	0.00690087	0.412595	0.0300214
		22.785	17.699		-5.044		0.0303113	0.416579
		22.827	17.774		-5.086		0.0294416	0.404627
6	CELF6-3	22.289	17.734	17.7153	-4.57367		0.0419942	0.577141	0.0235784	0.601681	0.0437797
		22.176	17.657		-4.46067		0.0454156	0.624163
		22.224	17.755		-4.50867		0.0439294	0.603738

## Sheet: DEG-TNFSF10
ID	Sample Name	Ct	Ct ref	Ct mean	△ct(-)		2-△ct	2-△△ct	Sd	RQ1
1	NC-1	27.687	17.695	17.8023	-9.88467	2	0.00105784	0.987942	0.0495398	1	0.00107075
		27.593	17.763		-9.79067		0.00112906	1.05446
		27.732	17.949		-9.92967		0.00102535	0.957602
2	NC-2	27.838	17.634	17.678	-10.16		0.000874048	0.816297	0.0333673	0.782434	0.000837789
		27.901	17.712		-10.223		0.000836702	0.781418
		27.961	17.688		-10.283		0.000802617	0.749586
3	NC-3	27.898	17.696	17.7057	-10.1923		0.000854676	0.798205	0.0507473	0.841611	0.000901153
		27.843	17.687		-10.1373		0.000887888	0.829223
		27.729	17.734		-10.0233		0.000960895	0.897405
4	CELF6-1	31.579	17.906	17.9067	-13.6723		7.6598e-05	0.0715369	0.00821495	0.0635481	6.80439e-05
		31.955	17.859		-14.0483		5.90242e-05	0.0551243
		31.74	17.955		-13.8333		6.85096e-05	0.063983
5	CELF6-2	32.089	17.75	17.741	-14.348		4.79536e-05	0.0447852	0.00359184	0.047325	5.06731e-05
		31.318	17.699		-13.577
		31.934	17.774		-14.193		5.33926e-05	0.0498648
6	CELF6-3	30.094	17.734	17.7153	-12.3787		0.00018778	0.175373	0.00130855	0.176188	0.000188653
		30.093	17.657		-12.3777		0.00018791	0.175495
		30.075	17.755		-12.3597		0.000190269	0.177698

## Sheet: DEG-MLKL
ID	Sample Name	Ct	Ct ref	Ct mean	△ct(-)		2-△ct	2-△△ct	Sd	RQ1
1	NC-1	26.272	17.695	17.8023	-8.46967	2	0.00282083	0.912832	0.0767303	1	0.00309019
		26.098	17.763		-8.29567		0.00318241	1.02984
		26.06	17.949		-8.25767		0.00326734	1.05733
2	NC-2	26.157	17.634	17.678	-8.479		0.00280264	0.906946	0.0345725	0.941524	0.00290949
		26.103	17.712		-8.425		0.00290953	0.941535
		26.051	17.688		-8.373		0.00301631	0.976091
3	NC-3	26.058	17.696	17.7057	-8.35233		0.00305983	0.990174	0.0941438	0.902969	0.00279035
		26.171	17.687		-8.46533		0.00282931	0.915578
		26.36	17.734		-8.65433		0.00248191	0.803157
4	CELF6-1	27.062	17.906	17.9067	-9.15533		0.00175376	0.567524	0.01875	0.58869	0.00181917
		26.993	17.859		-9.08633		0.00183967	0.595327
		26.974	17.955		-9.06733		0.00186406	0.603219
5	CELF6-2	26.507	17.75	17.741	-8.766		0.00229705	0.743337	0.0598988	0.702566	0.00217106
		26.532	17.699		-8.791		0.00225759	0.730567
		26.737	17.774		-8.996		0.00195855	0.633795
6	CELF6-3	26.42	17.734	17.7153	-8.70467		0.00239681	0.775619	0.0833121	0.687975	0.00212597
		26.613	17.657		-8.89767		0.00209669	0.678499
		26.767	17.755		-9.05167		0.00188442	0.609805

## Sheet: DEG-JUNB
ID	Sample Name	Ct	Ct ref	Ct mean	△ct(-)		2-△ct	2-△△ct	Sd	RQ1
1	NC-1	24.469	17.695	17.8023	-6.66667	2	0.00984313	1.02143	0.0594813	1	0.00963658
		24.6	17.763		-6.79767		0.00898873	0.932772
		24.435	17.949		-6.63267		0.0100779	1.04579
2	NC-2	24.611	17.634	17.678	-6.933		0.00818388	0.849252	0.0448293	0.900716	0.00867982
		24.493	17.712		-6.815		0.00888138	0.921633
		24.478	17.688		-6.8		0.0089742	0.931265
3	NC-3	24.288	17.696	17.7057	-6.58233		0.0104357	1.08292	0.0281458	1.09955	0.0105959
		24.224	17.687		-6.51833		0.010909	1.13204
		24.287	17.734		-6.58133		0.0104429	1.08367
4	CELF6-1	25.379	17.906	17.9067	-7.47233		0.00563123	0.58436	0.0935246	0.551974	0.00531914
		25.767	17.859		-7.86033		0.00430332	0.446561
		25.282	17.955		-7.37533		0.00602287	0.625001
5	CELF6-2	25.077	17.75	17.741	-7.336		0.00618934	0.642275	0.023343	0.656195	0.00632348
		24.988	17.699		-7.247		0.00658317	0.683145
		25.075	17.774		-7.334		0.00619792	0.643166
6	CELF6-3	24.954	17.734	17.7153	-7.23867		0.00662131	0.687102	0.0388341	0.683726	0.00658878
		25.049	17.657		-7.33367		0.00619935	0.643315
		24.885	17.755		-7.16967		0.00694568	0.720763

## Sheet: DEG-MYD88
ID	Sample Name	Ct	Ct ref	Ct mean	△ct(-)		2-△ct	2-△△ct	Sd	RQ1
1	NC-1	23.952	17.695	17.8023	-6.14967	2	0.0140853	1.01414	0.0122917	1	0.0138889
		23.981	17.763		-6.17867		0.013805	0.99396
		23.984	17.949		-6.18167		0.0137763	0.991897
2	NC-2	23.924	17.634	17.678	-6.246		0.0131755	0.948637	0.0231161	0.93945	0.0130479
		23.912	17.712		-6.234		0.0132855	0.95656
		23.979	17.688		-6.301		0.0126827	0.913153
3	NC-3	23.892	17.696	17.7057	-6.18633		0.0137318	0.988692	0.101166	0.92104	0.0127922
		24.189	17.687		-6.48333		0.0111769	0.80474
		23.92	17.734		-6.21433		0.0134679	0.969689
4	CELF6-1	24.877	17.906	17.9067	-6.97033		0.00797481	0.574187	0.0624377	0.596414	0.00828352
		24.944	17.859		-7.03733		0.00761292	0.548131
		24.661	17.955		-6.75433		0.00926282	0.666924
5	CELF6-2	24.736	17.75	17.741	-6.995		0.00783962	0.564454	0.0126612	0.571369	0.00793567
		24.738	17.699		-6.997		0.00782876	0.563672
		24.682	17.774		-6.941		0.00813862	0.585982
6	CELF6-3	24.354	17.734	17.7153	-6.63867		0.010036	0.722596	0.0456469	0.706769	0.00981621
		24.495	17.657		-6.77967		0.00910157	0.655315
		24.315	17.755		-6.59967		0.010311	0.742396

## Sheet: DEG-HSPA6
ID	Sample Name	Ct	Ct ref	Ct mean	△ct(-)		2-△ct	2-△△ct	Sd	RQ1
1	NC-1	29.986	17.695	17.8023	-12.1837	2	0.000214957	0.917154	0.175724	1	0.000234373
		30.044	17.763		-12.2417		0.000206486	0.881013
		29.596	17.949		-11.7937		0.000281678	1.20183
2	NC-2	29.648	17.634	17.678	-11.97		0.00024927	1.06356	0.186533	0.985074	0.000230875
		29.574	17.712		-11.896		0.00026239	1.11954
		30.11	17.688		-12.432		0.000180965	0.772123
3	NC-3	29.449	17.696	17.7057	-11.7433		0.000291679	1.2445	0.263296	0.966866	0.000226608
		29.861	17.687		-12.1553		0.00021922	0.935344
		30.237	17.734		-12.5313		0.000168925	0.72075
4	CELF6-1	24.467	17.906	17.9067	-6.56033		0.010596	45.21	1.94973	47.3095	0.0110881
		24.391	17.859		-6.48433		0.0111692	47.6554
		24.349	17.955		-6.44233		0.0114991	49.0632
5	CELF6-2	23.912	17.75	17.741	-6.171		0.0138785	59.2155	5.32678	55.1346	0.0129221
		23.965	17.699		-6.224		0.0133779	57.0796
		24.182	17.774		-6.441		0.0115098	49.1086
6	CELF6-3	24.882	17.734	17.7153	-7.16667		0.00696014	29.6968	0.903447	30.7388	0.00720436
		24.806	17.657		-7.09067		0.00733663	31.3032
		24.81	17.755		-7.09467		0.00731632	31.2165

## Sheet: DEG-CSF1
ID	Sample Name	Ct	Ct ref	Ct mean	△ct(-)		2-△ct	2-△△ct	Sd	RQ1
1	NC-1	25.368	17.695	17.8023	-7.56567	2	0.00527846	0.978172	0.0189329	1	0.00539625
		25.319	17.763		-7.51667		0.00546082	1.01197
		25.322	17.949		-7.51967		0.00544947	1.00986
2	NC-2	25.052	17.634	17.678	-7.374		0.00602844	1.11715	0.0277376	1.13796	0.00614069
		24.986	17.712		-7.308		0.00631063	1.16945
		25.039	17.688		-7.361		0.00608301	1.12727
3	NC-3	25.129	17.696	17.7057	-7.42333		0.00582578	1.0796	0.111652	1.08071	0.00583179
		24.985	17.687		-7.27933		0.00643727	1.19292
		25.284	17.734		-7.57833		0.00523232	0.969621
4	CELF6-1	26.034	17.906	17.9067	-8.12733		0.00357626	0.66273	0.0370129	0.647416	0.00349362
		26.009	17.859		-8.10233		0.00363877	0.674314
		26.165	17.955		-8.25833		0.00326583	0.605204
5	CELF6-2	25.913	17.75	17.741	-8.172		0.00346723	0.642526	0.0506528	0.696118	0.00375643
		25.703	17.699		-7.962		0.00401051	0.743203
		25.784	17.774		-8.043		0.00379154	0.702625
6	CELF6-3	25.783	17.734	17.7153	-8.06767		0.00372726	0.690713	0.0114689	0.686641	0.00370529
		25.773	17.657		-8.05767		0.00375319	0.695517
		25.819	17.755		-8.10367		0.00363541	0.673691

## Sheet: DEG-HSPA1B
ID	Sample Name	Ct	Ct ref	Ct mean	△ct(-)		2-△ct	2-△△ct	Sd	RQ1
1	NC-1	22.062	17.695	17.8023	-4.25967	2	0.052205	0.996132	0.0231576	1	0.0524077
		22.021	17.763		-4.21867		0.05371	1.02485
		22.087	17.949		-4.28467		0.0513082	0.97902
2	NC-2	21.987	17.634	17.678	-4.309		0.0504501	0.962646	0.0238051	0.969983	0.0508346
		22.005	17.712		-4.327		0.0498246	0.95071
		21.937	17.688		-4.259		0.0522292	0.996593
3	NC-3	22.018	17.696	17.7057	-4.31233		0.0503336	0.960424	0.0295581	0.99436	0.0521121
		21.948	17.687		-4.24233		0.052836	1.00817
		21.939	17.734		-4.23333		0.0531667	1.01448
4	CELF6-1	21.312	17.906	17.9067	-3.40533		0.0943827	1.80093	0.0329821	1.76326	0.0924083
		21.354	17.859		-3.44733		0.0916746	1.74926
		21.362	17.955		-3.45533		0.0911677	1.73959
5	CELF6-2	21.11	17.75	17.741	-3.369		0.0967898	1.84686	0.0236403	1.86239	0.0976035
		21.077	17.699		-3.336		0.0990294	1.88959
		21.107	17.774		-3.366		0.0969913	1.85071
6	CELF6-3	21.315	17.734	17.7153	-3.59967		0.0824882	1.57397	0.0197775	1.59087	0.0833739
		21.28	17.657		-3.56467		0.0845139	1.61262
		21.304	17.755		-3.58867		0.0831196	1.58602

[truncated: 7 more sheets: DEG-PIK3R2, DEG-CCL5, AS-CD44, AS-TP53, AS-CD47, AS-FN1, AS-SEC31A]
