# Supplementary material for: RNA-binding protein CELF6 modulates transcription and splicing levels of genes associated with tumorigenesis in lung cancer A549 cells
Source: PeerJ. 2022 Jul 26;10:e13800. doi: 10.7717/peerj.13800 (PMC9336609; doi:10.7717/peerj.13800)
Supplement: Supplemental Information 6 [file peerj-10-13800-s006.xls]

## Sheet: CELF6_vs_Ctrl_Sig_DEG
Gene	logFC	logCPM	PValue	FDR	CELF6_1st	CELF6_2nd	CELF6_3rd	Ctrl_1st	Ctrl_2nd	Ctrl_3rd	Symbol	Chr	GeneType	Description
ENSG00000184988.8	-0.772133	2.07221	7.52142e-08	3.11368e-06	0.81	0.82	1.08	1.34	1.69	1.47	TMEM106A	chr17	protein_coding	transmembrane protein 106A
ENSG00000123405.13	-1.52451	-0.838217	2.51856e-06	7.68135e-05	0.04	0.17	0.11	0.22	0.3	0.37	NFE2	chr12	protein_coding	nuclear factor, erythroid 2
ENSG00000133106.14	-1.82462	1.80086	2.35467e-30	4.7234e-28	0.32	0.48	0.57	1.94	1.36	1.46	EPSTI1	chr13	protein_coding	epithelial stromal interaction 1 (breast)
ENSG00000166589.12	-1.76846	0.235845	3.1705e-14	2.75474e-12	0.14	0.15	0.21	0.62	0.46	0.58	CDH16	chr16	protein_coding	cadherin 16, KSP-cadherin
ENSG00000278272.1	0.973344	-1.26282	0.00643951	0.0598292	1.21	1.44	0.76	0.39	0.86	0.43	HIST1H3C	chr6	protein_coding	histone cluster 1, H3c
ENSG00000107902.13	-0.800498	3.31095	4.5109e-11	2.84444e-09	4.13	3.32	4.11	6.8	6.46	6.39	LHPP	chr10	protein_coding	phospholysine phosphohistidine inorganic pyrophosphate phosphatase
ENSG00000167157.10	-0.584963	0.447755	0.00471304	0.0468935	0.63	0.82	0.86	1.07	1.24	1.08	PRRX2	chr9	protein_coding	paired related homeobox 2
ENSG00000135960.9	-2.17522	-2.36335	0.000410789	0.00657637	0.01	0.01	0.02	0.07	0.04	0.03	EDAR	chr2	protein_coding	ectodysplasin A receptor
ENSG00000244122.2	-0.959531	2.58033	5.83563e-13	4.51868e-11	1.43	1.65	1.93	3.95	3.25	2.34	UGT1A7	chr2	protein_coding	UDP glucuronosyltransferase 1 family, polypeptide A7
ENSG00000273036.2	0.728305	1.55242	3.54783e-06	0.000104166	1.1	1.4	1.45	0.82	0.73	0.76	FAM95C	chr9	lincRNA	family with sequence similarity 95, member C
ENSG00000202198.1	-1.15508	3.65992	2.83029e-22	4.06705e-20	35.79	12.07	20.53	49.21	46.14	53.23	RN7SK	chr6	misc_RNA	RNA, 7SK small nuclear
ENSG00000230797.2	0.611117	0.285191	0.00404356	0.0418737	0.5	0.53	0.46	0.35	0.34	0.27	YY2	chrX	protein_coding	YY2 transcription factor
ENSG00000143375.14	-0.589547	3.28929	1.16677e-06	3.84069e-05	1.64	1.31	1.48	2.24	2.18	2.09	CGN	chr1	protein_coding	cingulin
ENSG00000161328.10	-1.00848	-0.566076	0.000359306	0.00588778	0.12	0.11	0.2	0.23	0.26	0.36	LRRC56	chr11	protein_coding	leucine rich repeat containing 56
ENSG00000163995.18	-1.01056	0.0882301	1.16816e-05	0.000302821	0.1	0.14	0.13	0.22	0.24	0.29	ABLIM2	chr4	protein_coding	actin binding LIM protein family, member 2
ENSG00000227210.1	-1.7857	-2.58547	0.00741842	0.0666855	0	0	0.26	0.24	0.42	0.23	AC079145.4	chr2	antisense	--
ENSG00000148655.14	-0.797476	1.31148	1.57227e-06	5.00998e-05	0.35	0.28	0.4	0.67	0.48	0.61	C10orf11	chr10	protein_coding	chromosome 10 open reading frame 11
ENSG00000167165.18	-1.14172	0.800018	1.76161e-09	9.15699e-08	0.46	0.23	0.38	1.09	0.71	0.5	UGT1A6	chr2	protein_coding	UDP glucuronosyltransferase 1 family, polypeptide A6
ENSG00000206341.7	-1.73273	1.82405	4.07878e-28	7.43358e-26	1.16	1.72	1.37	4.21	5.49	4.09	HLA-H	chr6	unprocessed_pseudogene	major histocompatibility complex, class I, H (pseudogene)
ENSG00000166866.12	-0.848298	-0.546374	0.00315802	0.0343737	0.2	0.04	0.12	0.27	0.19	0.16	MYO1A	chr12	protein_coding	myosin IA
ENSG00000262343.1	1.62115	-1.8468	0.000677613	0.00995241	0.85	0.83	1.4	0.57	0.16	0.23	RP11-353N14.3	chr17	lincRNA	--
ENSG00000272335.1	1.0199	1.46426	2.68752e-10	1.53589e-08	1.52	1.38	1.31	0.73	0.56	0.73	RP11-53O19.3	chr5	lincRNA	--
ENSG00000089723.9	0.630424	3.29315	1.88758e-07	7.30802e-06	2.57	3.29	2.27	1.69	1.62	1.79	OTUB2	chr14	protein_coding	OTU deubiquitinase, ubiquitin aldehyde binding 2
ENSG00000274012.1	-0.620204	4.10004	4.44702e-08	1.88001e-06	65.11	29.41	35.96	62.56	54.46	78.42	Metazoa_SRP	chr14	misc_RNA	--
ENSG00000213886.3	-3.18217	3.27581	1.25036e-111	3.11434e-108	1.5	1.39	2.21	13.48	16.94	14.62	UBD	chr6	protein_coding	ubiquitin D
ENSG00000198520.10	-1.80953	-1.38148	4.12707e-06	0.000119068	0.02	0.12	0.09	0.28	0.24	0.28	C1orf228	chr1	protein_coding	chromosome 1 open reading frame 228
ENSG00000179044.15	-2.57427	-0.659529	1.5119e-14	1.34092e-12	0.04	0.01	0.14	0.35	0.37	0.38	EXOC3L1	chr16	protein_coding	exocyst complex component 3-like 1
ENSG00000227028.6	-1.85084	-1.94865	0.00024536	0.00427621	0.04	0.01	0.01	0.09	0.09	0.06	SLC8A1-AS1	chr2	antisense	SLC8A1 antisense RNA 1
ENSG00000246640.1	-1.10567	-0.975051	0.000739115	0.0106825	0.09	0.15	0.09	0.2	0.21	0.28	RP11-1094H24.4	chr17	lincRNA	--
ENSG00000150551.10	-0.629961	1.4372	0.000103	0.00202536	1.08	0.8	0.75	1.11	1.33	1.54	LYPD1	chr2	protein_coding	LY6/PLAUR domain containing 1
ENSG00000174125.7	-0.67924	1.28863	4.4972e-05	0.000987028	0.72	0.61	0.55	1.06	1.09	0.78	TLR1	chr4	protein_coding	toll-like receptor 1
ENSG00000269397.1	2.85489	-2.50608	0.000111135	0.0021654	0.11	0.11	0.21	0	0.05	0	CTB-92J24.2	chr19	sense_intronic	--
ENSG00000160716.4	-0.69397	-0.186236	0.00523609	0.0510275	0.14	0.09	0.08	0.15	0.14	0.2	CHRNB2	chr1	protein_coding	cholinergic receptor, nicotinic, beta 2 (neuronal)
ENSG00000223813.2	-1.3657	-0.364361	3.456e-07	1.26125e-05	0.33	0.15	0.33	0.68	0.62	0.74	AC007255.8	chr7	antisense	--
ENSG00000262294.1	-0.98158	-1.32969	0.00995159	0.082546	0.44	0.25	0.19	0.49	0.64	0.58	RP11-1260E13.2	chr17	antisense	--
ENSG00000271447.5	-0.863833	0.324872	5.12654e-05	0.00110553	0.4	0.28	0.31	0.52	0.66	0.57	MMP28	chr17	protein_coding	matrix metallopeptidase 28
ENSG00000012504.13	-1.12821	1.74211	2.80319e-13	2.27058e-11	0.76	0.29	0.81	2.02	1.3	0.67	NR1H4	chr12	protein_coding	nuclear receptor subfamily 1, group H, member 4
ENSG00000213949.8	-0.601405	1.69132	8.78943e-05	0.00177059	0.22	0.2	0.27	0.44	0.34	0.23	ITGA1	chr5	protein_coding	integrin, alpha 1
ENSG00000171855.6	-3.08803	1.67926	1.7956e-63	9.75795e-61	0.35	1.13	0.73	6.33	6.82	5.31	IFNB1	chr9	protein_coding	interferon, beta 1, fibroblast
ENSG00000130653.15	1.45687	-1.68859	0.00101831	0.0138852	0.05	0.12	0.05	0.05	0.02	0.01	PNPLA7	chr9	protein_coding	patatin-like phospholipase domain containing 7
ENSG00000148468.16	0.752333	2.95593	2.18068e-09	1.11923e-07	2.23	2.74	2.16	1.37	1.31	1.45	FAM171A1	chr10	protein_coding	family with sequence similarity 171, member A1
ENSG00000164442.9	-0.645447	3.89545	1.97822e-08	8.89127e-07	4.48	3.76	5.04	7.05	6.43	6.76	CITED2	chr6	protein_coding	Cbp/p300-interacting transactivator, with Glu/Asp-rich carboxy-terminal domain, 2
ENSG00000026103.19	-0.731969	4.03714	1.30923e-10	7.70305e-09	3.87	4.58	4.77	7.96	7.83	5.65	FAS	chr10	protein_coding	Fas cell surface death receptor
ENSG00000272990.1	1.18824	-0.731054	6.62378e-05	0.00137676	2.06	1.33	1	0.31	0.75	0.8	RP11-305K5.1	chr3	antisense	--
ENSG00000183044.11	-0.991637	-0.226195	8.59506e-05	0.0017358	0.07	0.1	0.08	0.2	0.2	0.11	ABAT	chr16	protein_coding	4-aminobutyrate aminotransferase
ENSG00000255071.3	-2.59063	-1.31403	4.68106e-10	2.58618e-08	0.07	0.15	0.15	0.75	0.75	0.75	SAA2-SAA4	chr11	protein_coding	SAA2-SAA4 readthrough
ENSG00000251301.6	-3.10945	-2.6264	8.15031e-05	0.0016583	0	0.01	0.01	0.08	0.07	0.09	RP11-81H14.2	chr12	lincRNA	--
ENSG00000169660.15	-0.927595	3.72878	2.03206e-15	1.94667e-13	3.83	3.5	4.25	7.08	7.15	7.23	HEXDC	chr17	protein_coding	hexosaminidase (glycosyl hydrolase family 20, catalytic domain) containing
ENSG00000204388.6	0.589993	6.82869	1.48096e-08	6.76824e-07	52.28	53.15	52.33	33.74	34.15	34.25	HSPA1B	chr6	protein_coding	heat shock 70kDa protein 1B
ENSG00000128849.10	0.859847	-0.268941	0.000663684	0.00979597	0.11	0.13	0.16	0.1	0.05	0.08	CGNL1	chr15	protein_coding	cingulin-like 1
ENSG00000110719.9	-0.714091	6.04641	1.33016e-11	8.73781e-10	15.05	15.7	17.55	23.62	25.77	27.71	TCIRG1	chr11	protein_coding	T-cell, immune regulator 1, ATPase, H+ transporting, lysosomal V0 subunit A3
ENSG00000163638.13	-0.618922	1.48792	0.000105017	0.00205962	0.21	0.24	0.27	0.45	0.33	0.31	ADAMTS9	chr3	protein_coding	ADAM metallopeptidase with thrombospondin type 1 motif, 9
ENSG00000171557.16	-1.0694	6.50558	3.59001e-24	5.76891e-22	28.91	19.05	33.03	73.82	54.73	38.22	FGG	chr4	protein_coding	fibrinogen gamma chain
ENSG00000060140.8	-0.744219	0.604647	0.000152462	0.0028624	0.4	0.33	0.33	0.52	0.62	0.59	STYK1	chr12	protein_coding	serine/threonine/tyrosine kinase 1
ENSG00000149633.11	-1.28964	-1.14158	0.000272903	0.00466369	0.02	0.04	0.05	0.08	0.09	0.08	KIAA1755	chr20	protein_coding	KIAA1755
ENSG00000143226.13	-2.4351	-2.20144	5.40102e-05	0.00115804	0.01	0.03	0.01	0.05	0.13	0.14	FCGR2A	chr1	protein_coding	Fc fragment of IgG, low affinity IIa, receptor (CD32)
ENSG00000271997.1	1.40392	-1.64513	0.000704159	0.0102616	0.1	0.06	0.13	0.03	0.06	0.02	RP11-97O12.6	chr15	sense_intronic	--
ENSG00000015413.9	-0.980304	-0.679638	0.000903639	0.0125388	0.25	0.19	0.15	0.35	0.39	0.39	DPEP1	chr16	protein_coding	dipeptidase 1 (renal)
ENSG00000121380.12	-2.89135	-2.75579	0.000466963	0.00733038	0	0.02	0	0.07	0.07	0.04	BCL2L14	chr12	protein_coding	BCL2-like 14 (apoptosis facilitator)
ENSG00000132821.11	-0.829626	3.6813	1.37003e-12	1.02629e-10	4.81	4.13	4.71	7.94	7.52	8.19	VSTM2L	chr20	protein_coding	V-set and transmembrane domain containing 2 like
ENSG00000117266.15	-1.53566	2.7385	2.16139e-30	4.36499e-28	0.92	0.89	1.23	3.05	2.77	2.79	CDK18	chr1	protein_coding	cyclin-dependent kinase 18
ENSG00000120675.5	-1.80281	-0.690757	8.17292e-09	3.88363e-07	0.03	0.01	0.05	0.13	0.09	0.1	DNAJC15	chr13	protein_coding	DnaJ (Hsp40) homolog, subfamily C, member 15
ENSG00000179873.14	3.10513	-3.16935	0.00671615	0.0617468	0.02	0.02	0.06	0	0	0.01	NLRP11	chr19	protein_coding	NLR family, pyrin domain containing 11
ENSG00000087245.12	0.671078	0.591174	0.000642954	0.00954183	0.42	0.39	0.29	0.28	0.16	0.24	MMP2	chr16	protein_coding	matrix metallopeptidase 2
ENSG00000057657.14	-0.861772	0.0881958	0.000168094	0.00309751	0.1	0.15	0.13	0.28	0.22	0.19	PRDM1	chr6	protein_coding	PR domain containing 1, with ZNF domain
ENSG00000075461.5	0.590646	2.71027	4.57652e-06	0.0001314	2.25	2.38	2.1	1.37	1.46	1.52	CACNG4	chr17	protein_coding	calcium channel, voltage-dependent, gamma subunit 4
ENSG00000258791.7	-2.12603	-2.84875	0.00819476	0.0712429	0	0.04	0	0.09	0.05	0.03	LINC00520	chr14	lincRNA	long intergenic non-protein coding RNA 520
ENSG00000054179.11	-1.31244	0.526936	2.86257e-10	1.63281e-08	0.43	0.17	0.5	1	1.1	0.57	ENTPD2	chr9	protein_coding	ectonucleoside triphosphate diphosphohydrolase 2
ENSG00000187951.10	0.66178	-0.0875465	0.0051262	0.050071	0.45	0.48	0.64	0.22	0.3	0.43	ARHGAP11B	chr15	protein_coding	Rho GTPase activating protein 11B
ENSG00000147872.9	-0.602637	6.81597	7.3566e-09	3.53507e-07	35.67	37.6	39.88	56.83	54.53	56.11	PLIN2	chr9	protein_coding	perilipin 2
ENSG00000282393.1	0.613623	1.94413	2.44309e-05	0.000582309	1.61	1.37	1.46	1.11	0.9	0.82	CTD-3113P16.11	chr19	lincRNA	--
ENSG00000224046.1	1.32677	-0.137616	1.06209e-07	4.27827e-06	1.9	1.54	1.22	0.48	0.46	0.86	AC005076.5	chr7	antisense	--
ENSG00000153064.11	-0.585391	0.331496	0.00583007	0.0554952	0.21	0.2	0.3	0.41	0.3	0.31	BANK1	chr4	protein_coding	B-cell scaffold protein with ankyrin repeats 1
ENSG00000277632.1	-3.2828	0.981877	2.6996e-49	1.12067e-46	0.32	0.49	0.51	4.17	3.26	5.12	CCL3	chr17	protein_coding	chemokine (C-C motif) ligand 3
ENSG00000109107.13	-1.25721	3.00455	7.69872e-23	1.13353e-20	1.93	1.8	2.97	4.95	5.41	5.24	ALDOC	chr17	protein_coding	aldolase C, fructose-bisphosphate
ENSG00000110436.11	-2.13098	-1.89807	2.51009e-05	0.000595428	0.01	0	0.01	0.04	0.02	0.01	SLC1A2	chr11	protein_coding	solute carrier family 1 (glial high affinity glutamate transporter), member 2
ENSG00000004468.12	-2.38559	5.00924	9.62857e-98	1.06588e-94	1.56	1.34	2.4	9.76	9.09	8.18	CD38	chr4	protein_coding	CD38 molecule
ENSG00000073331.17	-0.650665	3.23021	1.03437e-07	4.18354e-06	1.26	1.09	1.55	2.12	2.08	1.78	ALPK1	chr4	protein_coding	alpha-kinase 1
ENSG00000183484.11	-5.01282	-3.17037	0.000529739	0.00812385	0	0	0	0.04	0.01	0.04	GPR132	chr14	protein_coding	G protein-coupled receptor 132
ENSG00000184584.12	-2.95074	0.617813	6.14918e-36	1.49425e-33	0.16	0.14	0.26	1.28	1.35	1.52	TMEM173	chr5	protein_coding	transmembrane protein 173
ENSG00000258768.2	1.23623	-0.972855	0.000161808	0.00300577	0.19	0.18	0.11	0.03	0.13	0.05	CTD-2292M16.8	chr14	lincRNA	--
ENSG00000184730.10	-5.32555	-3.00069	6.94511e-05	0.00143358	0	0	0	0.05	0.03	0.03	APOBR	chr16	protein_coding	apolipoprotein B receptor
ENSG00000164691.16	-4.6126	-3.36291	0.00408448	0.0421259	0	0	0	0.01	0.01	0.04	TAGAP	chr6	protein_coding	T-cell activation RhoGTPase activating protein
ENSG00000005249.12	0.764568	1.37171	2.90287e-06	8.72876e-05	0.79	0.94	0.76	0.56	0.47	0.4	PRKAR2B	chr7	protein_coding	protein kinase, cAMP-dependent, regulatory, type II, beta
ENSG00000273079.4	0.628047	1.28981	0.000150747	0.00283733	0.11	0.08	0.09	0.06	0.06	0.06	GRIN2B	chr12	protein_coding	glutamate receptor, ionotropic, N-methyl D-aspartate 2B
ENSG00000117013.14	-1.77457	-1.11271	1.01219e-06	3.38784e-05	0.03	0.04	0.06	0.11	0.15	0.17	KCNQ4	chr1	protein_coding	potassium channel, voltage gated KQT-like subfamily Q, member 4
ENSG00000057593.13	-1.45188	-0.547733	4.64749e-07	1.64779e-05	0.13	0.07	0.11	0.44	0.26	0.14	F7	chr13	protein_coding	coagulation factor VII (serum prothrombin conversion accelerator)
ENSG00000162706.12	-1.77404	-2.26368	0.00163117	0.0201296	0.02	0.01	0.02	0.05	0.05	0.07	CADM3	chr1	protein_coding	cell adhesion molecule 3
ENSG00000078081.7	-2.54625	5.14547	1.03578e-110	1.9349e-107	2.02	2.13	4.52	17.12	16.43	15.77	LAMP3	chr3	protein_coding	lysosomal-associated membrane protein 3
ENSG00000182575.7	-1.98432	-2.29648	0.00108544	0.014581	0.02	0.02	0.02	0.06	0.11	0.05	NXPH3	chr17	protein_coding	neurexophilin 3
ENSG00000171227.6	-0.822331	3.91481	9.31869e-13	7.12343e-11	7.93	3.58	6.3	13.09	9.54	8.23	TMEM37	chr2	protein_coding	transmembrane protein 37
ENSG00000139832.4	-0.91535	3.32104	5.27443e-14	4.50421e-12	4.21	3.95	5.04	7.46	8.84	7.93	RAB20	chr13	protein_coding	RAB20, member RAS oncogene family
ENSG00000158467.16	-1.11895	4.01189	2.09248e-22	3.02135e-20	1.58	1.58	1.97	4.21	3.63	3.04	AHCYL2	chr7	protein_coding	adenosylhomocysteinase-like 2
ENSG00000099968.17	-0.60621	6.08319	8.67515e-09	4.08977e-07	7.02	7.11	8.05	10.83	11.32	10.77	BCL2L13	chr22	protein_coding	BCL2-like 13 (apoptosis facilitator)
ENSG00000198270.12	-0.597529	2.68487	4.06939e-06	0.000117744	3.45	3.01	3.21	4.9	4.96	4.43	TMEM116	chr12	protein_coding	transmembrane protein 116
ENSG00000185697.16	0.688537	2.37762	3.62877e-07	1.31627e-05	1.04	1.36	1.14	0.9	0.67	0.58	MYBL1	chr8	protein_coding	v-myb avian myeloblastosis viral oncogene homolog-like 1
ENSG00000130768.14	-0.726568	2.72433	1.91144e-08	8.60409e-07	2.12	2.18	2	3.46	3.47	3.25	SMPDL3B	chr1	protein_coding	sphingomyelin phosphodiesterase, acid-like 3B
ENSG00000172382.9	-1.17848	-0.489157	2.11534e-05	0.000512361	0.32	0.26	0.45	0.77	0.45	1.05	PRSS27	chr16	protein_coding	protease, serine 27
ENSG00000104518.10	-1.18768	4.97371	2.37573e-27	4.20168e-25	6.41	6.13	8.4	14.81	15.13	16.5	GSDMD	chr8	protein_coding	gasdermin D
ENSG00000166863.11	-3.24306	-0.366907	7.5583e-23	1.11837e-20	0.04	0.15	0.11	1.04	0.88	0.96	TAC3	chr12	protein_coding	tachykinin 3
ENSG00000132386.10	-1.29554	-0.988149	9.7948e-05	0.00194265	0.18	0.1	0.2	0.31	0.48	0.38	SERPINF1	chr17	protein_coding	serpin peptidase inhibitor, clade F (alpha-2 antiplasmin, pigment epithelium derived factor), member 1
ENSG00000261448.1	-0.760801	-0.517929	0.0056674	0.0543275	0.82	0.67	0.66	0.58	1.58	1.38	CTD-2576D5.4	chr16	antisense	--
ENSG00000169246.16	0.865076	-0.405065	0.00128102	0.0166689	0.34	0.38	0.31	0.11	0.23	0.21	NPIPB3	chr16	protein_coding	nuclear pore complex interacting protein family, member B3
ENSG00000204267.13	-0.896575	5.63304	4.67229e-17	4.90001e-15	4.75	5.25	6.34	10.05	9.61	9.98	TAP2	chr6	protein_coding	transporter 2, ATP-binding cassette, sub-family B (MDR/TAP)
ENSG00000116514.16	-0.933997	5.0944	7.6639e-18	8.36008e-16	8.2	8.89	9.05	15.39	15.86	17.37	RNF19B	chr1	protein_coding	ring finger protein 19B
ENSG00000144655.14	-0.60393	4.66323	3.90796e-08	1.66865e-06	5.7	5.88	6.6	8.46	8.71	9.72	CSRNP1	chr3	protein_coding	cysteine-serine-rich nuclear protein 1
ENSG00000213030.5	1.53338	-1.29424	3.38502e-05	0.000775882	0.75	0.58	0.42	0.27	0.12	0.2	CGB8	chr19	protein_coding	chorionic gonadotropin, beta polypeptide 8
ENSG00000109667.11	-0.59635	0.738892	0.00162766	0.0201113	0.56	0.57	0.62	1	0.85	0.74	SLC2A9	chr4	protein_coding	solute carrier family 2 (facilitated glucose transporter), member 9
ENSG00000176236.6	1.66544	-2.39659	0.00928981	0.0784359	0.08	0.11	0.17	0.05	0	0.06	C10orf111	chr10	antisense	chromosome 10 open reading frame 111
ENSG00000203797.9	-2.73412	0.472748	4.48235e-30	8.93153e-28	0.12	0.14	0.21	1.08	0.93	1.05	DDO	chr6	protein_coding	D-aspartate oxidase
ENSG00000278022.1	1.02319	-1.43202	0.00688606	0.0629796	0.9	0.76	1.05	0.35	0.55	0.39	RP11-35O15.2	chr15	sense_intronic	--
ENSG00000050165.17	-1.05695	4.71527	1.0783e-21	1.47841e-19	5.02	5.13	6.23	11.05	11.77	10.42	DKK3	chr11	protein_coding	dickkopf WNT signaling pathway inhibitor 3
ENSG00000139985.6	-1.0117	-0.948666	0.00168636	0.0207082	0.06	0.09	0.18	0.21	0.26	0.19	ADAM21	chr14	protein_coding	ADAM metallopeptidase domain 21
ENSG00000271778.1	2.20989	-2.6251	0.00296531	0.0326695	0.48	0.23	0.2	0.05	0.09	0.04	RP11-379F4.8	chr3	sense_intronic	--
ENSG00000163701.18	-1.0089	0.088032	1.16816e-05	0.000302821	0.3	0.18	0.2	0.42	0.53	0.38	IL17RE	chr3	protein_coding	interleukin 17 receptor E
ENSG00000250264.1	-0.932801	6.60213	6.48245e-19	7.75016e-17	21.58	23	27.28	42.79	44.93	45.91	XXbac-BPG246D15.9	chr6	protein_coding	--
ENSG00000206337.10	-2.6537	3.57916	1.42568e-91	1.37458e-88	1.03	1.04	1.5	7.91	6.93	7.03	HCP5	chr6	sense_overlapping	HLA complex P5 (non-protein coding)
ENSG00000185272.13	-2.13992	-2.20138	0.000259158	0.00447743	0	0.04	0.04	0.15	0.14	0.09	RBM11	chr21	protein_coding	RNA binding motif protein 11
ENSG00000165507.8	-1.40644	-0.0504929	1.29914e-08	5.99227e-07	0.22	0.22	0.24	0.64	0.59	0.54	C10orf10	chr10	protein_coding	chromosome 10 open reading frame 10
ENSG00000271430.1	0.868785	0.85969	2.84188e-06	8.57989e-05	0.49	0.57	0.64	0.29	0.25	0.36	RP3-368A4.5	chrX	sense_intronic	--
ENSG00000070729.13	-0.878493	-1.06963	0.00933714	0.0787688	0.09	0.03	0.01	0.07	0.09	0.08	CNGB1	chr16	protein_coding	cyclic nucleotide gated channel beta 1
ENSG00000237877.6	-1.8703	-2.36317	0.0017314	0.0211569	0.02	0	0.1	0.2	0.14	0.09	LINC01473	chr2	lincRNA	long intergenic non-protein coding RNA 1473
ENSG00000279296.1	-2.37308	-1.73414	8.55309e-07	2.88536e-05	0.03	0.02	0.01	0.15	0.12	0.08	RP11-609D21.3	chr17	TEC	--
ENSG00000268916.5	-3.71782	-1.82569	3.64605e-10	2.04843e-08	0.03	0	0.07	0.6	0.42	0.48	CSAG3	chrX	transcribed_processed_pseudogene	CSAG family, member 3
ENSG00000108771.12	-2.46103	3.21983	3.44549e-75	2.2885e-72	0.88	0.82	1.45	5.33	5.84	5.75	DHX58	chr17	protein_coding	DEXH (Asp-Glu-X-His) box polypeptide 58
ENSG00000124785.8	-1.20666	-1.54595	0.00443075	0.0447704	0.08	0.05	0.1	0.13	0.12	0.27	NRN1	chr6	protein_coding	neuritin 1
ENSG00000240087.3	1.34776	-1.75352	0.00299188	0.0329372	0.5	0.18	0.48	0.15	0.11	0.17	RP11-254B13.1	chr12	processed_pseudogene	--
ENSG00000100911.13	-0.951953	8.89131	3.56914e-20	4.52026e-18	196.8	186.33	250.05	394.2	406.37	393.73	PSME2	chr14	protein_coding	proteasome (prosome, macropain) activator subunit 2 (PA28 beta)
ENSG00000183691.4	0.750737	-0.62496	0.0085961	0.0737242	0.38	0.43	0.34	0.2	0.28	0.19	NOG	chr17	protein_coding	noggin
ENSG00000271533.1	1.63797	-0.845887	2.40205e-07	9.0308e-06	0.19	0.19	0.22	0.09	0.06	0.05	RP3-368A4.6	chrX	sense_intronic	--
ENSG00000255641.1	-2.05361	-1.94871	6.41953e-05	0.00134365	0.11	0.03	0.09	0.4	0.36	0.18	RP11-277P12.6	chr12	protein_coding	--
ENSG00000222033.1	-2.47285	-2.39827	0.000134251	0.00255419	0.03	0.01	0.01	0.11	0.11	0.08	LINC01124	chr2	lincRNA	long intergenic non-protein coding RNA 1124
ENSG00000163993.6	-1.27345	6.60877	2.18218e-33	4.86741e-31	46.36	31.37	52.1	112.42	100.16	94.1	S100P	chr4	protein_coding	S100 calcium binding protein P
ENSG00000073282.12	-0.888182	0.0308557	0.000144923	0.00273287	0.11	0.09	0.1	0.28	0.16	0.1	TP63	chr3	protein_coding	tumor protein p63
ENSG00000114541.14	-1.11254	0.72983	1.20164e-08	5.577e-07	0.15	0.12	0.27	0.49	0.39	0.25	FRMD4B	chr3	protein_coding	FERM domain containing 4B
ENSG00000259772.6	-0.721325	-0.39013	0.00738525	0.0664872	0.39	0.28	0.33	0.6	0.66	0.36	RP11-16E12.2	chr15	lincRNA	--
ENSG00000144712.11	-0.645541	0.191797	0.00322708	0.0349219	0.14	0.18	0.18	0.23	0.26	0.27	CAND2	chr3	protein_coding	cullin-associated and neddylation-dissociated 2 (putative)
ENSG00000006071.11	-0.726562	0.907626	7.6215e-05	0.00155813	0.29	0.24	0.28	0.47	0.48	0.36	ABCC8	chr11	protein_coding	ATP-binding cassette, sub-family C (CFTR/MRP), member 8
ENSG00000165556.9	-0.795423	-0.790291	0.00987049	0.0821139	0.08	0.09	0.1	0.19	0.16	0.12	CDX2	chr13	protein_coding	caudal type homeobox 2
ENSG00000122042.9	0.590779	2.59122	6.10367e-06	0.000169705	1.56	1.66	1.55	1.39	1.12	0.6	UBL3	chr13	protein_coding	ubiquitin-like 3
ENSG00000111331.12	-0.615475	9.20223	2.18312e-09	1.11923e-07	50.75	54.81	66.95	85.79	87.29	84.55	OAS3	chr12	protein_coding	2'-5'-oligoadenylate synthetase 3, 100kDa
ENSG00000247572.7	0.61667	1.58832	7.88511e-05	0.00160872	0.88	1.1	1.2	0.77	0.59	0.67	CKMT2-AS1	chr5	antisense	CKMT2 antisense RNA 1
ENSG00000140464.19	-0.882719	6.49923	4.39629e-17	4.62678e-15	6.69	6.37	8.17	11.87	12.62	13.63	PML	chr15	protein_coding	promyelocytic leukemia
ENSG00000184232.8	-0.782002	4.67104	1.24567e-12	9.37833e-11	6.89	6.69	7.97	11.7	12.29	12.12	OAF	chr11	protein_coding	OAF homolog (Drosophila)
ENSG00000197568.13	-0.687766	2.72369	1.01853e-07	4.12505e-06	4.77	4.73	5.28	7.84	7.25	8.12	HHLA3	chr1	protein_coding	HERV-H LTR-associating 3
ENSG00000277873.1	2.42649	-2.75422	0.00288816	0.0320075	0.43	0.08	0.16	0.11	0	0	RP11-33N14.3	chr12	antisense	--
ENSG00000111344.11	-1.2228	-0.338978	5.15298e-06	0.000145712	0.1	0.08	0.13	0.22	0.26	0.25	RASAL1	chr12	protein_coding	RAS protein activator like 1 (GAP1 like)
ENSG00000184497.12	-1.11189	-1.2016	0.00205287	0.0241473	0.03	0.05	0.03	0.08	0.07	0.08	TMEM255B	chr13	protein_coding	transmembrane protein 255B
ENSG00000224251.6	0.589923	0.377314	0.00425381	0.043501	3.05	2.48	4.8	2.36	2.21	2.09	RP11-499O7.7	chr10	antisense	--
ENSG00000182093.14	0.585432	4.14762	2.10141e-07	7.99818e-06	12	11.4	11.38	9.34	7.05	6.28	WRB	chr21	protein_coding	tryptophan rich basic protein
ENSG00000137745.11	-1.70103	-1.09788	2.07342e-06	6.43536e-05	0.05	0.02	0.13	0.2	0.2	0.23	MMP13	chr11	protein_coding	matrix metallopeptidase 13
ENSG00000238045.9	-0.687551	1.95765	2.66742e-06	8.1023e-05	0.81	0.56	0.83	0.85	1.44	1.14	PAGR1	chr16	antisense	PAXIP1 associated glutamate-rich protein 1
ENSG00000225111.1	-2.61882	-1.71238	9.64057e-08	3.93107e-06	0.06	0.23	0.12	0.73	1.14	0.7	AC083900.1	chr2	sense_intronic	--
ENSG00000101040.19	-0.616257	4.63271	2.16137e-08	9.64199e-07	2.76	3.35	3.63	5.34	5.18	4.07	ZMYND8	chr20	protein_coding	zinc finger, MYND-type containing 8
ENSG00000143355.15	-0.866708	0.680876	8.17155e-06	0.000218852	0.15	0.1	0.09	0.24	0.2	0.16	LHX9	chr1	protein_coding	LIM homeobox 9
ENSG00000136147.16	-0.604739	4.36295	5.98019e-08	2.4964e-06	6.59	6.36	7.7	10.92	10.07	9.65	PHF11	chr13	protein_coding	PHD finger protein 11
ENSG00000081803.15	-0.689148	1.10034	6.77794e-05	0.00140392	0.17	0.27	0.32	0.43	0.4	0.37	CADPS2	chr7	protein_coding	Ca++-dependent secretion activator 2
ENSG00000130433.7	-1.60138	3.9822	7.83663e-42	2.27407e-39	3.79	3.23	5.23	11.81	12.03	12.35	CACNG6	chr19	protein_coding	calcium channel, voltage-dependent, gamma subunit 6
ENSG00000136881.11	-0.644752	1.84579	1.52152e-05	0.000383445	0.76	0.65	0.96	1.32	1.27	1.02	BAAT	chr9	protein_coding	bile acid CoA:amino acid N-acyltransferase
ENSG00000157303.10	-0.896145	-0.576696	0.00152867	0.0191253	0.37	0.36	0.25	0.56	0.62	0.6	SUSD3	chr9	protein_coding	sushi domain containing 3
ENSG00000057149.14	-0.944674	-0.733812	0.00172272	0.0210767	0.15	0.14	0.21	0.33	0.34	0.27	SERPINB3	chr18	protein_coding	serpin peptidase inhibitor, clade B (ovalbumin), member 3
ENSG00000134321.11	-2.12154	4.41677	1.64261e-72	1.0673e-69	1.45	2.09	3.04	10.79	9.46	7.72	RSAD2	chr2	protein_coding	radical S-adenosyl methionine domain containing 2
ENSG00000275056.1	1.2633	-1.34497	0.000647049	0.00957408	0.43	0.59	0.26	0.22	0.09	0.21	RP11-127I20.8	chr16	sense_intronic	--
ENSG00000183688.4	0.818769	4.25637	3.23833e-13	2.61596e-11	6.83	6.71	6.04	3.62	3.62	3.58	FAM101B	chr17	protein_coding	family with sequence similarity 101, member B
ENSG00000225101.4	-2.05602	-0.723935	2.3166e-10	1.34188e-08	0.2	0.2	0.24	0.7	0.89	1.05	OR52K3P	chr11	unprocessed_pseudogene	olfactory receptor, family 52, subfamily K, member 3 pseudogene
ENSG00000228445.1	-2.18876	-2.17105	0.000159295	0.00297016	0.03	0.12	0.03	0.24	0.29	0.35	UGT1A2P	chr2	unprocessed_pseudogene	UDP glucuronosyltransferase 1 family, polypeptide A2 pseudogene
ENSG00000221500.1	2.13312	-2.6671	0.00487128	0.0480877	1.45	2.84	2.24	0.35	0.67	0.33	SNORD100	chr6	snoRNA	small nucleolar RNA, C/D box 100
ENSG00000246465.1	-0.868581	-0.480647	0.00140191	0.0179527	0.2	0.2	0.15	0.23	0.41	0.33	RP11-57A19.2	chr16	lincRNA	--
ENSG00000104953.18	-0.729298	2.10099	2.93222e-07	1.08736e-05	1.36	1.21	1.4	1.97	2.09	2.35	TLE6	chr19	protein_coding	transducin-like enhancer of split 6
ENSG00000204622.10	-2.28002	-2.11238	5.94688e-05	0.00125794	0.02	0.05	0.03	0.21	0.22	0.08	HLA-J	chr6	transcribed_unprocessed_pseudogene	major histocompatibility complex, class I, J (pseudogene)
ENSG00000162654.8	-2.62428	3.13433	2.81159e-81	2.10089e-78	0.32	0.33	0.5	2.46	2.29	2.18	GBP4	chr1	protein_coding	guanylate binding protein 4
ENSG00000278472.1	1.89623	-1.99929	0.00024536	0.00427621	0.66	0.77	0.56	0.12	0.17	0.22	RP11-74D7.3	chr15	sense_intronic	--
ENSG00000197646.7	-3.37315	-1.77923	1.23778e-09	6.55959e-08	0.02	0	0.02	0.21	0.16	0.14	PDCD1LG2	chr9	protein_coding	programmed cell death 1 ligand 2
ENSG00000100767.15	-0.945418	1.08312	8.68427e-08	3.56705e-06	0.21	0.23	0.23	0.42	0.5	0.35	PAPLN	chr14	protein_coding	papilin, proteoglycan-like sulfated glycoprotein
ENSG00000231274.5	-0.855486	-0.722443	0.00430851	0.0439213	0.41	0.21	0.27	0.46	0.5	0.62	SBK3	chr19	protein_coding	SH3 domain binding kinase family, member 3
ENSG00000272512.1	-1.06098	0.196851	1.91038e-06	5.97275e-05	0.41	0.31	0.26	0.76	0.54	0.7	RP11-54O7.17	chr1	lincRNA	--
ENSG00000267576.1	-2.12587	-2.84869	0.00819476	0.0712429	0.03	0.06	0	0.17	0.14	0.11	CTC-510F12.6	chr19	sense_intronic	--
ENSG00000061918.12	1.38682	-1.44907	0.00060313	0.0090406	0.08	0.07	0.21	0.04	0.02	0.07	GUCY1B3	chr4	protein_coding	guanylate cyclase 1, soluble, beta 3
ENSG00000229474.6	-1.99699	-0.825848	2.53354e-09	1.29003e-07	0.06	0.01	0.2	0.36	0.33	0.38	PATL2	chr15	protein_coding	protein associated with topoisomerase II homolog 2 (yeast)
ENSG00000121577.13	-1.68156	-2.47013	0.00676608	0.0621294	0.03	0.02	0.03	0.05	0.09	0.1	POPDC2	chr3	protein_coding	popeye domain containing 2
ENSG00000231908.1	-0.861949	-0.596516	0.00243793	0.0278699	1.13	0.66	0.75	1.19	1.92	1.4	IDH1-AS1	chr2	antisense	IDH1 antisense RNA 1
ENSG00000269044.2	0.742442	0.0279972	0.00127652	0.0166363	0.71	0.81	0.88	0.61	0.5	0.29	CTC-429P9.3	chr19	sense_intronic	--
ENSG00000135722.8	-0.798738	1.64047	2.63646e-07	9.83785e-06	0.61	0.92	0.99	1.55	1.15	1.59	FBXL8	chr16	protein_coding	F-box and leucine-rich repeat protein 8
ENSG00000105246.5	-0.944412	1.42616	6.98743e-09	3.38488e-07	1.28	1.52	1.6	2.2	2.65	3.38	EBI3	chr19	protein_coding	Epstein-Barr virus induced 3
ENSG00000170775.2	-0.725199	0.330999	0.000759909	0.010904	0.28	0.2	0.39	0.55	0.52	0.34	GPR37	chr7	protein_coding	G protein-coupled receptor 37 (endothelin receptor type B-like)
ENSG00000227591.5	-1.48469	-2.05525	0.00418326	0.0429373	0.31	0.12	0.19	0.59	0.62	0.51	RP1-28O10.1	chr1	antisense	--
ENSG00000166750.9	-0.788888	4.40943	1.53406e-12	1.13494e-10	1.36	1.32	1.55	3.04	2.21	1.9	SLFN5	chr17	protein_coding	schlafen family member 5
ENSG00000131171.12	-0.693501	5.77258	6.37769e-11	3.94664e-09	20.3	19.67	23.21	40.51	32.16	27.28	SH3BGRL	chrX	protein_coding	SH3 domain binding glutamate-rich protein like
ENSG00000167895.14	-1.79381	0.575513	2.08243e-17	2.21501e-15	0.12	0.17	0.13	0.38	0.47	0.57	TMC8	chr17	protein_coding	transmembrane channel-like 8
ENSG00000197766.7	-0.698944	4.80486	1.66324e-10	9.69059e-09	17.88	14.62	18.14	27.11	25.82	27.22	CFD	chr19	protein_coding	complement factor D (adipsin)
ENSG00000273259.2	-0.631363	1.99807	1.20326e-05	0.00031084	2.05	1.68	1.92	2.82	3.11	2.6	SERPINA3	chr14	protein_coding	serpin peptidase inhibitor, clade A (alpha-1 antiproteinase, antitrypsin), member 3
ENSG00000135114.12	-2.11329	8.34059	8.82749e-87	7.9953e-84	30.6	28.34	49.52	144.32	156.57	156.41	OASL	chr12	protein_coding	2'-5'-oligoadenylate synthetase-like
ENSG00000149809.14	-0.679522	3.17368	3.15357e-08	1.37401e-06	4	3.76	3.88	6.15	5.94	6.1	TM7SF2	chr11	protein_coding	transmembrane 7 superfamily member 2
ENSG00000257622.1	-0.677542	-0.346824	0.00832968	0.0721123	1.29	1.01	0.74	1.48	1.47	1.8	RP11-44N21.4	chr14	processed_transcript	--
ENSG00000162543.5	-0.862288	0.125711	0.000133065	0.00254133	0.16	0.1	0.12	0.27	0.23	0.18	UBXN10	chr1	protein_coding	UBX domain protein 10
ENSG00000005421.8	-1.01087	0.0312942	1.63722e-05	0.000409292	0.26	0.13	0.34	0.52	0.51	0.39	PON1	chr7	protein_coding	paraoxonase 1
ENSG00000241635.7	-1.03804	2.31112	8.73356e-14	7.35316e-12	0.75	0.5	0.84	1.52	1.43	1.24	UGT1A1	chr2	protein_coding	UDP glucuronosyltransferase 1 family, polypeptide A1
ENSG00000179627.9	-0.784906	3.45197	5.70105e-11	3.55738e-09	1.61	1.73	2.63	3.22	3.42	3.36	ZBTB42	chr14	protein_coding	zinc finger and BTB domain containing 42
ENSG00000215595.1	-4.44975	-3.4334	0.00808871	0.0706704	0	0	0	0.08	0.03	0.02	C20orf202	chr20	protein_coding	chromosome 20 open reading frame 202
ENSG00000115414.18	-0.798995	7.98981	1.20293e-14	1.07971e-12	19.49	18.12	21.79	41.76	32.27	27.09	FN1	chr2	protein_coding	fibronectin 1
ENSG00000225964.5	-3.02813	-1.58678	6.2388e-10	3.40276e-08	0.03	0.06	0.09	0.49	0.47	0.47	NRIR	chr2	antisense	negative regulator of interferon response (non-protein coding)
ENSG00000261697.5	4.67686	-3.36195	0.00408448	0.0421259	0.02	0	0.08	0	0	0	RP11-178L8.5	chr16	sense_intronic	--
ENSG00000135697.9	-1.20486	3.45296	3.67747e-23	5.57949e-21	2.11	1.77	2.67	5.14	4.74	4.82	BCO1	chr16	protein_coding	beta-carotene oxygenase 1
ENSG00000141574.7	-2.75145	0.448198	6.65257e-30	1.2996e-27	0.07	0.17	0.19	0.94	0.98	0.94	SECTM1	chr17	protein_coding	secreted and transmembrane 1
ENSG00000243137.7	-0.745573	-0.527515	0.00697902	0.0636545	0.17	0.26	0.21	0.23	0.37	0.43	PSG4	chr19	protein_coding	pregnancy specific beta-1-glycoprotein 4
ENSG00000281468.1	0.784773	-0.207469	0.00152704	0.0191253	1.26	2.17	1.29	1.08	0.8	0.8	CTC-459F4.9	chr19	sense_intronic	--
ENSG00000260329.1	0.798832	-0.327332	0.00178851	0.0216863	0.71	0.64	0.52	0.38	0.29	0.38	RP11-412D9.4	chr12	antisense	--
ENSG00000104213.12	-1.86466	5.37817	3.62365e-64	2.04353e-61	7.97	6.98	12.38	30.85	33.96	32.18	PDGFRL	chr8	protein_coding	platelet-derived growth factor receptor-like
ENSG00000181513.14	-0.593957	4.53905	7.74525e-08	3.19748e-06	6.58	6.08	6.83	8.98	9.59	10.07	ACBD4	chr17	protein_coding	acyl-CoA binding domain containing 4
ENSG00000255398.2	-3.00419	0.946532	1.3538e-43	4.25933e-41	0.13	0.25	0.17	1.51	1.66	1.21	HCAR3	chr12	protein_coding	hydroxycarboxylic acid receptor 3
ENSG00000113721.13	-1.85887	-2.54596	0.00465381	0.0464588	0	0	0.01	0.04	0.02	0.03	PDGFRB	chr5	protein_coding	platelet-derived growth factor receptor, beta polypeptide
ENSG00000276980.1	-0.731434	0.642958	0.000166107	0.00307036	0.55	1.03	0.83	1.23	1.4	1.29	CTD-3128G10.7	chr19	sense_intronic	--
ENSG00000021300.13	-0.759266	0.500007	0.000197201	0.00354216	0.35	0.37	0.28	0.6	0.5	0.57	PLEKHB1	chr11	protein_coding	pleckstrin homology domain containing, family B (evectins) member 1
ENSG00000181007.8	0.780829	-0.130661	0.00112622	0.0149874	0.5	0.29	0.42	0.23	0.24	0.21	ZFP82	chr19	protein_coding	ZFP82 zinc finger protein
ENSG00000145476.15	-1.18178	-0.0778567	1.57913e-06	5.02648e-05	0.24	0.21	0.32	0.52	0.67	0.52	CYP4V2	chr4	protein_coding	cytochrome P450, family 4, subfamily V, polypeptide 2
ENSG00000178826.10	-1.04847	0.822513	2.27422e-08	1.00852e-06	0.37	0.41	0.49	0.76	0.99	0.79	TMEM139	chr7	protein_coding	transmembrane protein 139
ENSG00000270010.1	-1.05991	-0.767669	0.000554008	0.00844404	0.38	0.75	0.84	1.52	1.21	1.31	CTD-2132N18.4	chr17	sense_intronic	--
ENSG00000134716.9	-1.8764	2.23347	6.60704e-37	1.67354e-34	0.73	0.8	1.52	3.69	3.29	3.89	CYP2J2	chr1	protein_coding	cytochrome P450, family 2, subfamily J, polypeptide 2
ENSG00000227619.1	-1.24337	2.90605	6.11154e-22	8.5833e-20	1.82	1.19	2.23	4.2	3.88	4.01	RP11-492E3.2	chr9	antisense	--
ENSG00000023445.13	-0.856354	6.56727	3.25552e-16	3.26525e-14	8.16	10.36	9.91	19.93	16.82	13.57	BIRC3	chr11	protein_coding	baculoviral IAP repeat containing 3
ENSG00000184922.13	-0.664412	5.77773	3.74437e-10	2.0958e-08	9.76	9.5	10.35	14.27	15.02	16.42	FMNL1	chr17	protein_coding	formin-like 1
ENSG00000222035.3	-1.84599	0.160368	1.48374e-14	1.31986e-12	0.12	0.06	0.25	0.64	0.51	0.37	AC079354.3	chr2	antisense	--
ENSG00000196074.12	1.08688	-1.56429	0.00607497	0.0572868	0.06	0.08	0.07	0.02	0.02	0.05	SYCP2	chr20	protein_coding	synaptonemal complex protein 2
ENSG00000266976.1	-2.28307	0.37951	1.67228e-22	2.43818e-20	0.06	0.06	0.15	0.39	0.5	0.42	AC079466.1	chr19	lincRNA	--
ENSG00000128422.15	-3.12537	1.20634	5.49595e-52	2.45177e-49	0.31	0.25	0.32	1.97	3.08	2.38	KRT17	chr17	protein_coding	keratin 17, type I
ENSG00000106560.10	-2.38351	0.148169	7.48186e-21	9.7653e-19	0.07	0.1	0.43	1.03	0.84	1.11	GIMAP2	chr7	protein_coding	GTPase, IMAP family member 2
ENSG00000134339.8	-2.72457	-0.792041	2.80143e-14	2.46271e-12	0.06	0.07	0.04	0.43	0.31	0.41	SAA2	chr11	protein_coding	serum amyloid A2
ENSG00000126353.3	-1.44386	0.650448	1.00116e-12	7.61415e-11	0.25	0.27	0.42	0.73	0.9	0.86	CCR7	chr17	protein_coding	chemokine (C-C motif) receptor 7
ENSG00000214381.4	-1.15357	0.60429	1.05501e-08	4.92707e-07	0.35	0.25	0.45	0.78	0.72	0.76	LINC00488	chr3	lincRNA	long intergenic non-protein coding RNA 488
ENSG00000172794.19	-0.865523	0.372021	4.88883e-05	0.00106039	0.24	0.14	0.18	0.38	0.36	0.27	RAB37	chr17	protein_coding	RAB37, member RAS oncogene family
ENSG00000128242.12	-0.710987	4.94007	6.50951e-11	4.0116e-09	9.78	7.48	11.15	15.96	15.38	14.06	GAL3ST1	chr22	protein_coding	galactose-3-O-sulfotransferase 1
ENSG00000041880.14	-1.11602	4.21957	7.53984e-23	1.11837e-20	4.05	4.41	5.32	9.6	9.9	9.59	PARP3	chr3	protein_coding	poly (ADP-ribose) polymerase family, member 3
ENSG00000152689.17	-1.45488	2.92814	4.64879e-29	8.85016e-27	0.7	0.66	0.82	1.99	2.15	1.71	RASGRP3	chr2	protein_coding	RAS guanyl releasing protein 3 (calcium and DAG-regulated)
ENSG00000125618.16	-0.665073	1.39988	4.39744e-05	0.00096857	0.45	0.43	0.49	0.68	0.68	0.75	PAX8	chr2	protein_coding	paired box 8
ENSG00000157613.10	-0.794544	0.573856	6.57393e-05	0.00136926	0.27	0.41	0.45	0.58	0.59	0.75	CREB3L1	chr11	protein_coding	cAMP responsive element binding protein 3-like 1
ENSG00000274427.1	1.45282	-1.94668	0.00319136	0.0346483	1.04	1.13	1.54	0.22	0.53	0.53	RP11-972P1.10	chr12	sense_intronic	--
ENSG00000236519.1	2.35128	-2.54495	0.00107834	0.0145183	0.29	0.18	0.08	0.03	0.02	0.05	LINC01424	chr21	antisense	long intergenic non-protein coding RNA 1424
ENSG00000158856.17	-0.642315	5.63862	1.57489e-09	8.21498e-08	11.2	10.03	13.14	17.28	17.62	17.4	DMTN	chr8	protein_coding	dematin actin binding protein
ENSG00000105852.10	-0.689894	4.64698	3.80392e-10	2.12118e-08	16.77	13.77	19.75	30.43	27.87	21.05	PON3	chr7	protein_coding	paraoxonase 3
ENSG00000213654.9	-0.716648	0.600754	0.000263505	0.0045342	0.49	0.52	0.72	0.78	1	0.98	GPSM3	chr6	protein_coding	G-protein signaling modulator 3
ENSG00000105287.12	-0.715418	6.5271	8.48437e-12	5.73856e-10	16.75	17.33	19.72	27.28	29.12	29.63	PRKD2	chr19	protein_coding	protein kinase D2
ENSG00000185245.7	-2.84833	-2.43384	3.64102e-05	0.000825068	0.01	0.01	0.01	0.04	0.09	0.12	GP1BA	chr17	protein_coding	glycoprotein Ib (platelet), alpha polypeptide
ENSG00000272106.1	0.642212	-0.0464977	0.00712494	0.0646305	0.53	0.58	0.49	0.39	0.31	0.3	RP11-345P4.9	chr1	antisense	--
ENSG00000236824.1	0.622834	8.63526	1.48792e-09	7.78851e-08	35.78	33.71	34.83	19.98	21.41	24.53	BCYRN1	chr2	lincRNA	brain cytoplasmic RNA 1
ENSG00000101347.8	-0.758993	6.78697	3.73225e-13	2.97475e-11	13.84	16.14	19.94	29.05	27.56	25.8	SAMHD1	chr20	protein_coding	SAM domain and HD domain 1
ENSG00000006606.8	-0.728098	0.664935	0.000159813	0.0029754	1.37	1.72	1.64	2.51	2.26	2.87	CCL26	chr7	protein_coding	chemokine (C-C motif) ligand 26
ENSG00000169752.16	0.779476	-0.431588	0.00304928	0.0333969	0.95	0.58	0.66	0.52	0.46	0.26	NRG4	chr15	protein_coding	neuregulin 4
ENSG00000159871.14	-2.01023	-1.41692	7.53327e-07	2.5821e-05	0.03	0.06	0.04	0.12	0.22	0.17	LYPD5	chr19	protein_coding	LY6/PLAUR domain containing 5
ENSG00000118160.13	-1.34154	-0.120594	1.06209e-07	4.27827e-06	0.07	0.07	0.12	0.23	0.22	0.22	SLC8A2	chr19	protein_coding	solute carrier family 8 (sodium/calcium exchanger), member 2
ENSG00000280237.1	0.709396	-0.335704	0.00567731	0.0543932	0.2	0.15	0.17	0.07	0.13	0.11	MIR4697HG	chr11	TEC	MIR4697 host gene
ENSG00000202538.1	-1.08651	-0.164322	1.75485e-05	0.000436361	4.69	2.68	3.62	5.43	8.28	8.99	RNU4-2	chr12	snRNA	RNA, U4 small nuclear 2
ENSG00000281398.2	0.635251	1.23919	0.000154475	0.00289112	3.25	3.24	2.98	2.2	1.79	1.96	SNHG4	chr5	processed_transcript	small nucleolar RNA host gene 4
ENSG00000197110.8	-3.15319	2.92365	3.13292e-100	4.07129e-97	0.96	1.57	3.2	13.59	17.67	18.18	IFNL3	chr19	protein_coding	interferon, lambda 3
ENSG00000152766.5	-0.913487	1.21602	9.72473e-08	3.95998e-06	1.12	0.79	0.94	1.97	1.68	1.6	ANKRD22	chr10	protein_coding	ankyrin repeat domain 22
ENSG00000173786.16	-0.735307	8.42115	1.07214e-12	8.13326e-11	46.41	43.07	54.08	75.39	78.53	79.01	CNP	chr17	protein_coding	2',3'-cyclic nucleotide 3' phosphodiesterase
ENSG00000253616.5	-0.719191	0.550996	0.00033724	0.00559366	1.25	1.41	0.84	1.71	1.58	2.33	RP11-875O11.3	chr8	antisense	--
ENSG00000226950.6	1.46782	4.85954	3.98901e-40	1.11428e-37	22.13	21.31	16.47	6.22	7.42	7.44	DANCR	chr4	processed_transcript	differentiation antagonizing non-protein coding RNA
ENSG00000127415.12	-1.15051	2.084	2.06181e-15	1.96887e-13	1	1.01	0.99	1.88	2.28	2.32	IDUA	chr4	protein_coding	iduronidase, alpha-L-
ENSG00000163536.12	-0.601741	1.67104	8.43874e-05	0.00170538	1	0.87	1.41	1.95	1.69	1.22	SERPINI1	chr3	protein_coding	serpin peptidase inhibitor, clade I (neuroserpin), member 1
ENSG00000182329.10	-1.86501	-1.71198	3.92768e-05	0.00087801	0.01	0.02	0.04	0.06	0.15	0.06	KIAA2012	chr2	protein_coding	KIAA2012
ENSG00000164488.11	-0.78408	1.64732	4.61429e-07	1.63796e-05	0.65	0.3	0.61	1.14	0.87	0.61	DACT2	chr6	protein_coding	dishevelled-binding antagonist of beta-catenin 2
ENSG00000204338.8	-3.22582	-3.05482	0.00198795	0.0236046	0	0	0.01	0.07	0.01	0.09	CYP21A1P	chr6	transcribed_unprocessed_pseudogene	cytochrome P450, family 21, subfamily A, polypeptide 1 pseudogene
ENSG00000095303.14	-1.11482	-0.19452	1.33768e-05	0.000343191	0.09	0.06	0.11	0.16	0.2	0.19	PTGS1	chr9	protein_coding	prostaglandin-endoperoxide synthase 1 (prostaglandin G/H synthase and cyclooxygenase)
ENSG00000189334.8	-1.15986	-1.3294	0.00239261	0.0274415	0.15	0.04	0.29	0.27	0.46	0.32	S100A14	chr1	protein_coding	S100 calcium binding protein A14
ENSG00000214274.9	-0.88896	3.14991	7.48925e-13	5.76923e-11	5.43	3.04	5.11	9.97	8.37	6.26	ANG	chr14	protein_coding	angiogenin, ribonuclease, RNase A family, 5
ENSG00000161558.10	-0.594633	3.1159	1.47377e-06	4.72635e-05	2.78	2.52	2.5	3.7	3.62	4.15	TMEM143	chr19	protein_coding	transmembrane protein 143
ENSG00000197405.7	-1.12204	1.23782	5.08336e-11	3.19194e-09	0.56	0.58	0.67	1.18	1.34	1.34	C5AR1	chr19	protein_coding	complement component 5a receptor 1
ENSG00000115041.12	0.985486	-1.08129	0.00346228	0.0369718	0.18	0.16	0.14	0.07	0.05	0.12	KCNIP3	chr2	protein_coding	Kv channel interacting protein 3, calsenilin
ENSG00000135363.11	-0.765974	1.35088	2.99169e-06	8.97776e-05	0.64	0.67	0.91	1.37	1.13	1.19	LMO2	chr11	protein_coding	LIM domain only 2 (rhombotin-like 1)
ENSG00000162645.12	-1.43238	2.29447	6.98492e-24	1.0988e-21	1.07	1.05	1.31	3.42	3.13	2.48	GBP2	chr1	protein_coding	guanylate binding protein 2, interferon-inducible
ENSG00000170703.15	-1.06438	1.81567	2.30397e-12	1.67144e-10	0.61	0.46	0.7	1.17	1.29	1.13	TTLL6	chr17	protein_coding	tubulin tyrosine ligase-like family member 6
ENSG00000198719.8	-1.22596	-0.898302	0.000124981	0.00240849	0.06	0.09	0.12	0.28	0.15	0.17	DLL1	chr6	protein_coding	delta-like 1 (Drosophila)
ENSG00000101276.14	-0.780001	0.684843	5.64375e-05	0.00120318	0.43	0.35	0.25	0.55	0.65	0.53	SLC52A3	chr20	protein_coding	solute carrier family 52 (riboflavin transporter), member 3
ENSG00000266728.5	-2.80315	2.84171	7.08647e-83	5.57388e-80	2.47	1.48	4.65	20.75	20.15	17.41	AC015688.3	chr17	protein_coding	--
ENSG00000229214.1	0.885413	-1.13939	0.0099134	0.0823518	0.22	0.21	0.2	0.09	0.13	0.12	LINC00242	chr6	lincRNA	long intergenic non-protein coding RNA 242
ENSG00000269900.3	-0.682241	3.93861	2.74075e-09	1.38375e-07	71.65	20.24	35.19	53.09	61.81	83.53	RMRP	chr9	lincRNA	RNA component of mitochondrial RNA processing endoribonuclease
ENSG00000160185.13	-5.01221	-3.17069	0.000529739	0.00812385	0	0	0	0.01	0.09	0.02	UBASH3A	chr21	protein_coding	ubiquitin associated and SH3 domain containing A
ENSG00000232656.7	1.3601	-1.99938	0.00669463	0.0617468	0.11	0.27	0.27	0	0.08	0.16	IDI2-AS1	chr10	antisense	IDI2 antisense RNA 1
ENSG00000260170.1	-0.751114	6.22559	9.66157e-13	7.3667e-11	49.59	51.02	52.52	84.87	84.17	82.23	RP11-96O20.4	chr15	protein_coding	--
ENSG00000206077.10	-5.01232	-3.17063	0.000529739	0.00812385	0	0	0	0.03	0.07	0.02	ZDHHC11B	chr5	protein_coding	zinc finger, DHHC-type containing 11B
ENSG00000185100.10	-1.36764	2.52333	1.81307e-23	2.82244e-21	1.55	0.72	1.39	3.34	2.93	2.95	ADSSL1	chr14	protein_coding	adenylosuccinate synthase like 1
ENSG00000255650.5	-1.53273	-2.02775	0.00281391	0.0313591	0.07	0.22	0.08	0.28	0.17	0.61	FAM222A-AS1	chr12	antisense	FAM222A antisense RNA 1
ENSG00000182324.6	0.614735	1.95011	2.30432e-05	0.00055276	1.03	1.15	0.91	0.71	0.56	0.7	KCNJ14	chr19	protein_coding	potassium channel, inwardly rectifying subfamily J, member 14
ENSG00000142089.15	-2.30036	8.61587	2.6249e-101	3.56617e-98	81.4	81.11	155.49	480.31	510	535.54	IFITM3	chr11	protein_coding	interferon induced transmembrane protein 3
ENSG00000089127.12	-1.03204	9.25185	2.10863e-23	3.26554e-21	88.57	79.54	115.09	187.31	190.06	187.37	OAS1	chr12	protein_coding	2'-5'-oligoadenylate synthetase 1, 40/46kDa
ENSG00000281028.1	-0.872391	0.504531	1.89757e-05	0.000465653	0.67	0.64	0.69	1.52	1.13	0.95	PI4K2B	chr4	protein_coding	phosphatidylinositol 4-kinase type 2 beta
ENSG00000151023.16	-1.15944	-0.898352	0.000269026	0.00461062	0.07	0.06	0.08	0.18	0.15	0.13	ENKUR	chr10	protein_coding	enkurin, TRPC channel interacting protein
ENSG00000172765.16	-0.93929	5.21883	3.86127e-18	4.30633e-16	3.73	2.91	4.55	7.77	7.12	6.06	TMCC1	chr3	protein_coding	transmembrane and coiled-coil domain family 1
ENSG00000216775.2	0.593679	0.5223	0.00296156	0.0326644	0.54	0.57	0.48	0.37	0.41	0.25	RP1-152L7.5	chr6	transcribed_unprocessed_pseudogene	--
ENSG00000100628.11	0.866495	0.774737	4.9646e-06	0.000141187	0.63	0.72	0.5	0.32	0.29	0.37	ASB2	chr14	protein_coding	ankyrin repeat and SOCS box containing 2
ENSG00000228857.2	-1.71779	-2.29604	0.0025451	0.0288364	0.08	0	0.21	0.2	0.42	0.34	AC104653.1	chr2	lincRNA	--
ENSG00000139178.10	-0.769764	4.75579	2.24941e-12	1.63698e-10	4.59	5.01	5.29	8.41	8.32	8.01	C1RL	chr12	protein_coding	complement component 1, r subcomponent-like
ENSG00000165948.10	-0.591468	3.24767	1.13949e-06	3.7675e-05	6.44	5.52	6.26	8.29	9.62	8.83	IFI27L1	chr14	protein_coding	interferon, alpha-inducible protein 27-like 1
ENSG00000255337.1	-1.32691	-1.68977	0.00364426	0.0384209	0.24	0.12	0.25	0.46	0.62	0.4	RP11-315O6.1	chr11	antisense	--
ENSG00000145012.12	0.741128	4.06867	6.74171e-11	4.14615e-09	0.87	0.96	0.84	0.63	0.49	0.44	LPP	chr3	protein_coding	LIM domain containing preferred translocation partner in lipoma
ENSG00000170965.9	-0.930126	0.254111	1.78406e-05	0.00044252	0.71	0.6	0.7	1.28	1.21	1.23	PLAC1	chrX	protein_coding	placenta-specific 1
ENSG00000254166.1	-0.71702	-0.113531	0.00360306	0.0380767	1.5	2.21	1.47	2.81	3.53	2	CASC19	chr8	lincRNA	cancer susceptibility candidate 19 (non-protein coding)
ENSG00000133321.10	-2.70633	5.75703	1.73204e-127	5.75212e-124	9.13	7.73	16.02	68.27	72.55	68.22	RARRES3	chr11	protein_coding	retinoic acid receptor responder (tazarotene induced) 3
ENSG00000101850.12	-1.47644	-2.29607	0.00814918	0.0710131	0.02	0.03	0.08	0.12	0.13	0.1	GPR143	chrX	protein_coding	G protein-coupled receptor 143
ENSG00000105402.7	-0.614321	7.50329	3.02903e-09	1.51904e-07	73.47	69.01	84.46	107.89	114.33	116.27	NAPA	chr19	protein_coding	N-ethylmaleimide-sensitive factor attachment protein, alpha
ENSG00000151790.8	-0.63911	-0.00819353	0.00664871	0.0614671	0.6	0.24	0.42	0.65	0.85	0.4	TDO2	chr4	protein_coding	tryptophan 2,3-dioxygenase
ENSG00000108679.12	-1.43352	10.0285	6.22787e-43	1.89944e-40	177.56	195.02	265.27	523.57	564.59	589.35	LGALS3BP	chr17	protein_coding	lectin, galactoside-binding, soluble, 3 binding protein
ENSG00000142623.9	0.846697	-0.0531193	0.000389352	0.00630408	0.27	0.34	0.28	0.16	0.17	0.15	PADI1	chr1	protein_coding	peptidyl arginine deiminase, type I
ENSG00000108342.12	-1.11341	0.814313	4.04573e-09	2.00535e-07	0.48	0.81	0.46	1.18	1.16	1.38	CSF3	chr17	protein_coding	colony stimulating factor 3 (granulocyte)
ENSG00000185038.14	-1.29144	-0.547582	5.81247e-06	0.000162667	0.07	0.05	0.07	0.23	0.14	0.09	MROH2A	chr2	protein_coding	maestro heat-like repeat family member 2A
ENSG00000108813.10	-0.674791	1.96915	3.48858e-06	0.000102729	0.94	1.13	1.04	1.52	1.56	1.77	DLX4	chr17	protein_coding	distal-less homeobox 4
ENSG00000267390.1	-1.39088	-1.18684	0.00013034	0.00249566	0.18	0.41	0.18	0.77	0.61	0.61	RP11-635N19.1	chr18	antisense	--
ENSG00000152377.12	1.07834	0.427478	1.71747e-07	6.67534e-06	0.28	0.41	0.37	0.14	0.19	0.16	SPOCK1	chr5	protein_coding	sparc/osteonectin, cwcv and kazal-like domains proteoglycan (testican) 1
ENSG00000189212.12	0.826324	0.411984	5.61326e-05	0.00119925	0.33	0.34	0.32	0.22	0.19	0.14	DPY19L2P1	chr7	transcribed_unprocessed_pseudogene	DPY19L2 pseudogene 1
ENSG00000272666.1	-1.35883	-0.135268	8.6882e-08	3.56705e-06	0.87	0.49	0.94	2.02	2.02	1.73	CTA-384D8.35	chr22	lincRNA	--
ENSG00000019549.8	0.870271	0.105057	0.00012189	0.00235346	0.47	0.61	0.61	0.51	0.19	0.21	SNAI2	chr8	protein_coding	snail family zinc finger 2
ENSG00000099338.22	-1.14513	-1.08376	0.00084742	0.0119193	0.06	0.06	0.08	0.16	0.14	0.14	CATSPERG	chr19	protein_coding	catsper channel auxiliary subunit gamma
ENSG00000205593.11	-0.729214	0.288131	0.000751969	0.0108108	0.2	0.14	0.18	0.3	0.24	0.29	DENND6B	chr22	protein_coding	DENN/MADD domain containing 6B
ENSG00000204397.7	-2.30285	-0.267108	5.9964e-16	5.8956e-14	0.2	0.39	0.31	1.58	1.49	1.28	CARD16	chr11	protein_coding	caspase recruitment domain family, member 16
ENSG00000117595.10	-1.3333	-1.28044	0.000405497	0.00650908	0.09	0.02	0.02	0.14	0.1	0.08	IRF6	chr1	protein_coding	interferon regulatory factor 6
ENSG00000004139.13	-0.966038	3.27426	3.16506e-15	2.97486e-13	0.62	0.56	0.66	1.25	1.12	1.13	SARM1	chr17	protein_coding	sterile alpha and TIR motif containing 1
ENSG00000224956.5	0.746685	-0.574198	0.00801201	0.0705603	0.56	0.7	0.57	0.45	0.33	0.29	RP11-206L10.1	chr1	unprocessed_pseudogene	--
ENSG00000156587.15	-1.49241	8.75293	5.14889e-46	1.74881e-43	104.94	98.5	163.24	319.34	345.46	340.69	UBE2L6	chr11	protein_coding	ubiquitin-conjugating enzyme E2L 6
ENSG00000142910.15	-0.590958	0.715478	0.00204578	0.0240828	0.3	0.56	0.76	0.73	0.71	0.92	TINAGL1	chr1	protein_coding	tubulointerstitial nephritis antigen-like 1
ENSG00000167608.11	-1.10206	0.00502	3.80228e-06	0.000111418	0.28	0.19	0.24	0.44	0.37	0.67	TMC4	chr19	protein_coding	transmembrane channel-like 4
ENSG00000173267.13	-0.688093	4.34998	7.36223e-10	4.0009e-08	19.66	18.53	19.99	28.57	30.55	32.19	SNCG	chr10	protein_coding	synuclein, gamma (breast cancer-specific protein 1)
ENSG00000178226.10	-0.874047	-0.711284	0.00340915	0.0365219	0.15	0.1	0.15	0.23	0.18	0.3	PRSS36	chr16	protein_coding	protease, serine, 36
ENSG00000118276.11	0.679629	0.339092	0.00147849	0.0186458	0.25	0.49	0.38	0.36	0.13	0.2	B4GALT6	chr18	protein_coding	UDP-Gal:betaGlcNAc beta 1,4- galactosyltransferase, polypeptide 6
ENSG00000189143.9	-1.53113	1.81829	5.74416e-23	8.6275e-21	0.3	0.44	0.49	1.09	1.29	1.09	CLDN4	chr7	protein_coding	claudin 4
ENSG00000180999.10	-1.07972	-1.17059	0.00236201	0.0271949	0.07	0.1	0.29	0.25	0.31	0.39	C1orf105	chr1	protein_coding	chromosome 1 open reading frame 105
ENSG00000216937.11	0.717376	-0.0740974	0.00281613	0.0313721	0.15	0.23	0.24	0.13	0.13	0.11	CCDC7	chr10	protein_coding	coiled-coil domain containing 7
ENSG00000276168.1	-0.6604	4.94377	1.23767e-09	6.55959e-08	105.32	60.83	65.35	98.79	106.14	150.84	RN7SL1	chr14	misc_RNA	RNA, 7SL, cytoplasmic 1
ENSG00000101098.12	0.689047	0.555843	0.000519319	0.00800925	0.33	0.32	0.33	0.17	0.19	0.24	RIMS4	chr20	protein_coding	regulating synaptic membrane exocytosis 4
ENSG00000085117.11	-1.0337	3.17264	7.43276e-17	7.71381e-15	2.06	2.95	2.46	4.79	5.31	4.81	CD82	chr11	protein_coding	CD82 molecule
ENSG00000279204.1	-1.14023	-1.58557	0.00828513	0.0718037	0.07	0.06	0.09	0.14	0.11	0.23	RP11-175K6.2	chr5	TEC	--
ENSG00000224934.2	0.945562	-1.27846	0.00847649	0.0729916	0.17	0.15	0.13	0.12	0.07	0.04	RP11-441O15.3	chr10	lincRNA	--
ENSG00000198756.10	-2.43346	-3.00047	0.00791611	0.0699806	0	0	0	0.02	0.01	0.02	COLGALT2	chr1	protein_coding	collagen beta(1-O)galactosyltransferase 2
ENSG00000039987.6	4.5133	-3.43271	0.00808871	0.0706704	0.05	0.02	0.03	0	0	0	BEST2	chr19	protein_coding	bestrophin 2
ENSG00000141497.13	-1.1084	0.190724	7.21015e-07	2.48223e-05	0.28	0.26	0.27	0.63	0.55	0.54	ZMYND15	chr17	protein_coding	zinc finger, MYND-type containing 15
ENSG00000240668.1	1.58049	-1.87146	0.001006	0.0137487	0.33	0.19	0.16	0.11	0.07	0.04	KRT8P36	chr3	processed_pseudogene	keratin 8 pseudogene 36
ENSG00000275902.1	1.21386	-1.43194	0.00144338	0.0183502	0.68	0.59	0.62	0.31	0.22	0.26	RP13-1032I1.11	chr17	antisense	--
ENSG00000268798.1	1.36683	-1.66669	0.00182333	0.0220281	0.38	0.37	0.26	0.07	0.12	0.18	CTB-25B13.5	chr19	lincRNA	--
ENSG00000256940.1	0.741934	2.53111	2.44716e-08	1.07881e-06	13.24	12.61	9.15	6.06	6.33	7.98	RP11-783K16.5	chr11	antisense	--
ENSG00000151224.12	-0.9435	0.655757	1.55942e-06	4.97966e-05	0.27	0.28	0.34	0.65	0.55	0.46	MAT1A	chr10	protein_coding	methionine adenosyltransferase I, alpha
ENSG00000148584.14	-0.693786	1.89746	2.68335e-06	8.14241e-05	0.36	0.16	0.34	0.66	0.4	0.3	A1CF	chr10	protein_coding	APOBEC1 complementation factor
ENSG00000256092.2	0.775811	0.832856	3.03329e-05	0.000703351	0.96	0.99	0.9	0.38	0.5	0.73	RP13-942N8.1	chr12	lincRNA	--
ENSG00000157873.17	-2.62705	-0.618622	2.50989e-15	2.38153e-13	0.04	0.07	0.13	0.34	0.61	0.54	TNFRSF14	chr1	protein_coding	tumor necrosis factor receptor superfamily, member 14
ENSG00000244187.7	-0.661655	5.75672	4.53057e-10	2.51232e-08	55.75	46.13	56.67	83.9	80.6	80.18	TMEM141	chr9	protein_coding	transmembrane protein 141
ENSG00000146674.14	-1.21677	8.64941	1.48587e-31	3.12754e-29	86.44	71.3	109.26	212.09	206	187.86	IGFBP3	chr7	protein_coding	insulin-like growth factor binding protein 3
ENSG00000187595.14	-0.946765	-0.94846	0.00321458	0.0348299	0.07	0.09	0.19	0.25	0.21	0.2	ZNF385C	chr17	protein_coding	zinc finger protein 385C
ENSG00000275703.1	1.2726	-1.39662	0.00074168	0.0107144	0.72	1.29	0.92	0.34	0.33	0.49	U47924.32	chr12	lincRNA	--
ENSG00000147027.3	-0.724664	2.34987	1.1607e-07	4.63179e-06	0.79	0.93	1.01	2.11	1.35	0.96	TMEM47	chrX	protein_coding	transmembrane protein 47
ENSG00000175938.6	-0.639009	2.95437	3.89516e-07	1.40099e-05	2.47	2.07	2.56	3.9	3.54	3.34	ORAI3	chr16	protein_coding	ORAI calcium release-activated calcium modulator 3
ENSG00000132256.18	-0.809015	5.63242	3.33711e-14	2.89109e-12	8.62	7.79	10.29	16.04	15.31	14.3	TRIM5	chr11	protein_coding	tripartite motif containing 5
ENSG00000081051.7	0.970793	-1.31081	0.00754856	0.0675102	0.21	0.14	0.19	0.06	0.09	0.11	AFP	chr4	protein_coding	alpha-fetoprotein
ENSG00000123843.12	-1.10943	-0.0569177	5.27868e-06	0.000148844	0.56	0.42	0.37	1.04	0.93	0.89	C4BPB	chr1	protein_coding	complement component 4 binding protein, beta
ENSG00000163659.12	0.644041	4.66808	4.57158e-09	2.25107e-07	6.24	7.07	5.43	4.61	3.68	3.42	TIPARP	chr3	protein_coding	TCDD-inducible poly(ADP-ribose) polymerase
ENSG00000102524.11	-2.8492	1.15825	7.77231e-45	2.58118e-42	0.14	0.11	0.32	1.67	1.27	1.09	TNFSF13B	chr13	protein_coding	tumor necrosis factor (ligand) superfamily, member 13b
ENSG00000214295.4	3.44271	-2.99957	0.00107592	0.0145183	0.16	0.05	0.04	0	0.02	0	FOXO1B	chr5	processed_pseudogene	forkhead box O1B pseudogene
ENSG00000171236.9	-1.49261	-0.557464	2.61668e-07	9.77626e-06	0.15	0.04	0.12	0.44	0.29	0.13	LRG1	chr19	protein_coding	leucine-rich alpha-2-glycoprotein 1
ENSG00000196218.11	-0.648649	0.367913	0.00202062	0.0238713	0.06	0.06	0.07	0.09	0.08	0.11	RYR1	chr19	protein_coding	ryanodine receptor 1 (skeletal)
ENSG00000140092.14	-1.02674	2.45	4.17387e-14	3.59518e-12	0.98	0.99	1.25	2.19	2.47	1.74	FBLN5	chr14	protein_coding	fibulin 5
ENSG00000261487.1	-0.627272	2.25292	6.11418e-06	0.000169839	3.01	2.13	3.03	4.51	4.45	3.37	AC135048.13	chr16	processed_transcript	--
ENSG00000189058.8	-1.23103	0.0687847	1.54602e-07	6.05622e-06	0.63	0.41	0.48	1.24	1.26	0.99	APOD	chr3	protein_coding	apolipoprotein D
ENSG00000151090.17	-0.638661	1.97929	1.10024e-05	0.000287205	0.33	0.37	0.37	0.66	0.52	0.45	THRB	chr3	protein_coding	thyroid hormone receptor, beta
ENSG00000125430.8	-0.649121	0.254441	0.00242842	0.0277777	0.15	0.16	0.17	0.3	0.25	0.18	HS3ST3B1	chr17	protein_coding	heparan sulfate (glucosamine) 3-O-sulfotransferase 3B1
ENSG00000269925.1	1.42096	-1.71029	0.00146576	0.0185478	0.56	1.44	0.72	0.54	0.32	0.13	RP3-467L1.6	chr1	sense_intronic	--
ENSG00000161955.16	-2.42681	-1.43441	4.26758e-08	1.80927e-06	0.02	0.01	0.09	0.26	0.18	0.22	TNFSF13	chr17	protein_coding	tumor necrosis factor (ligand) superfamily, member 13
ENSG00000006611.15	-0.889715	4.15846	4.4465e-15	4.14024e-13	4.25	2.16	3.93	7.82	5.99	4.95	USH1C	chr11	protein_coding	Usher syndrome 1C (autosomal recessive, severe)
ENSG00000226835.1	-3.03336	-0.366883	3.25514e-21	4.3629e-19	0.29	0.22	0.41	2.58	2.8	2.11	RP11-148B18.3	chr1	lincRNA	--
ENSG00000279348.1	0.924703	-0.822758	0.00229939	0.0265969	0.21	0.31	0.41	0.12	0.18	0.17	RP11-566E18.1	chr2	TEC	--
ENSG00000108622.10	-1.74563	-1.89827	0.000356339	0.00585198	0.04	0.12	0.02	0.24	0.18	0.18	ICAM2	chr17	protein_coding	intercellular adhesion molecule 2
ENSG00000112309.10	4.67644	-3.36216	0.00408448	0.0421259	0.01	0.01	0.02	0	0	0	B3GAT2	chr6	protein_coding	beta-1,3-glucuronyltransferase 2
ENSG00000185499.16	-1.4802	1.84184	9.10847e-22	1.26039e-19	0.46	0.33	0.47	1.11	1.16	1.16	MUC1	chr1	protein_coding	mucin 1, cell surface associated
ENSG00000198610.10	-0.63808	0.362828	0.00275449	0.0307772	0.86	0.42	0.7	0.97	1.06	0.97	AKR1C4	chr10	protein_coding	aldo-keto reductase family 1, member C4
ENSG00000135409.10	0.892581	-0.515084	0.00127685	0.0166363	0.65	0.39	0.27	0.2	0.19	0.3	AMHR2	chr12	protein_coding	anti-Mullerian hormone receptor, type II
ENSG00000182040.8	-1.20404	-1.24772	0.00111312	0.0148594	0.1	0.02	0.06	0.07	0.13	0.21	USH1G	chr17	protein_coding	Usher syndrome 1G (autosomal recessive)
ENSG00000107821.14	-0.85122	-0.314162	0.000861139	0.0120386	0.17	0.39	0.24	0.52	0.45	0.45	KAZALD1	chr10	protein_coding	Kazal-type serine peptidase inhibitor domain 1
ENSG00000247137.8	0.640055	0.770959	0.000561573	0.00853756	1.22	1.18	1.22	0.81	0.72	0.73	RP11-727A23.5	chr11	processed_transcript	--
ENSG00000164308.16	-0.737428	2.07487	2.45681e-07	9.22506e-06	0.43	0.55	0.56	1	0.81	0.69	ERAP2	chr5	protein_coding	endoplasmic reticulum aminopeptidase 2
ENSG00000158714.10	-4.89127	-3.23178	0.00104527	0.0141624	0	0	0	0.07	0	0.03	SLAMF8	chr1	protein_coding	SLAM family member 8
ENSG00000266053.2	1.6273	-1.43252	5.92737e-05	0.0012547	0.23	0.55	0.2	0.07	0.05	0.18	NDUFV2-AS1	chr18	antisense	NDUFV2 antisense RNA 1
ENSG00000245694.8	0.765965	3.66994	5.60359e-11	3.50389e-09	9.91	10.13	9.59	6.54	5.1	5.37	CRNDE	chr16	lincRNA	colorectal neoplasia differentially expressed (non-protein coding)
ENSG00000151655.17	-0.651822	2.49212	1.13681e-06	3.76279e-05	1.47	0.96	1.52	2.55	1.95	1.57	ITIH2	chr10	protein_coding	inter-alpha-trypsin inhibitor heavy chain 2
ENSG00000137462.6	-1.31764	-1.23277	0.000355266	0.00584078	0.04	0.05	0.05	0.07	0.15	0.13	TLR2	chr4	protein_coding	toll-like receptor 2
ENSG00000151882.11	-1.29684	-1.87347	0.00574897	0.0548455	0.02	0.06	0.03	0.06	0.12	0.08	CCL28	chr5	protein_coding	chemokine (C-C motif) ligand 28
ENSG00000174804.3	-0.904571	0.939322	7.75359e-07	2.65157e-05	0.17	0.15	0.19	0.33	0.28	0.32	FZD4	chr11	protein_coding	frizzled class receptor 4
ENSG00000225864.1	-2.84834	-2.43383	3.64102e-05	0.000825068	0.03	0.03	0.03	0.16	0.2	0.28	HCG4P11	chr6	unprocessed_pseudogene	HLA complex group 4 pseudogene 11
ENSG00000240457.3	2.24922	-2.84768	0.00819476	0.0712429	0.28	0.64	0.48	0.09	0	0.17	RN7SL472P	chr14	misc_RNA	RNA, 7SL, cytoplasmic 472, pseudogene
ENSG00000224308.1	-2.30202	-2.75553	0.00288816	0.0320075	0.01	0.01	0.01	0.16	0.04	0.03	LINC01527	chr1	antisense	long intergenic non-protein coding RNA 1527
ENSG00000242861.1	-0.91303	-0.452738	0.000698608	0.0101957	1.27	1.16	1.46	2.88	2.48	1.82	RP11-285F7.2	chr1	antisense	--
ENSG00000196569.11	-0.692292	-0.0153012	0.00356678	0.0378444	0.04	0.1	0.07	0.1	0.1	0.13	LAMA2	chr6	protein_coding	laminin, alpha 2
ENSG00000180316.11	-1.52862	-1.82529	0.001006	0.0137487	0.06	0.02	0.06	0.1	0.22	0.09	PNPLA1	chr6	protein_coding	patatin-like phospholipase domain containing 1
ENSG00000187091.13	-0.596894	2.52117	6.9492e-06	0.000190555	1.33	1.24	1.51	2.06	2.05	1.92	PLCD1	chr3	protein_coding	phospholipase C, delta 1
ENSG00000104490.17	-0.647272	1.82765	1.43887e-05	0.0003657	0.62	0.51	0.76	1.08	0.89	0.91	NCALD	chr8	protein_coding	neurocalcin delta
ENSG00000276718.1	-1.7448	-1.69009	8.79103e-05	0.00177059	0	0.32	0.24	0.48	0.59	0.76	RP1-102E24.10	chr12	antisense	--
ENSG00000172296.12	-1.492	-1.75626	0.00089593	0.0124609	0.03	0.02	0.01	0.06	0.08	0.02	SPTLC3	chr20	protein_coding	serine palmitoyltransferase, long chain base subunit 3
ENSG00000205809.9	-1.35729	0.947922	2.47033e-13	2.02289e-11	0.83	0.56	0.79	1.96	1.85	1.63	KLRC2	chr12	protein_coding	killer cell lectin-like receptor subfamily C, member 2
ENSG00000247092.6	0.631559	2.32087	3.92233e-06	0.000114399	3.92	3.75	3.77	2.19	2.37	2.63	SNHG10	chr14	antisense	small nucleolar RNA host gene 10
ENSG00000104324.15	-0.804935	1.3813	9.20733e-07	3.08518e-05	1.03	0.86	0.87	1.56	1.5	1.65	CPQ	chr8	protein_coding	carboxypeptidase Q
ENSG00000091262.14	-1.09408	0.878159	5.42591e-09	2.65426e-07	0.15	0.13	0.25	0.37	0.43	0.3	ABCC6	chr16	protein_coding	ATP-binding cassette, sub-family C (CFTR/MRP), member 6
ENSG00000272463.1	-1.61287	-1.87357	0.000751059	0.0108029	0.04	0.07	0	0.14	0.09	0.1	RP11-532F6.3	chr6	lincRNA	--
ENSG00000135100.17	-0.677455	3.99528	2.97076e-09	1.49232e-07	2.62	2.67	3.25	4.23	4.39	4.67	HNF1A	chr12	protein_coding	HNF1 homeobox A
ENSG00000125354.22	-0.621533	4.30115	2.80849e-08	1.23264e-06	2.52	2.69	2.68	3.87	4.03	3.93	SEPT6	chrX	protein_coding	septin 6
ENSG00000232931.5	0.977402	-0.197662	6.72099e-05	0.00139503	0.37	0.35	0.5	0.21	0.15	0.24	LINC00342	chr2	lincRNA	long intergenic non-protein coding RNA 342
ENSG00000074317.10	0.682464	0.258703	0.00174995	0.0213407	0.91	0.82	0.83	0.44	0.32	0.79	SNCB	chr5	protein_coding	synuclein, beta
ENSG00000180096.11	1.33246	0.219742	2.68926e-09	1.36005e-07	1.12	0.98	0.82	0.3	0.35	0.48	SEPT1	chr16	protein_coding	septin 1
ENSG00000278238.1	0.986603	-1.08126	0.00346228	0.0369718	0.94	0.87	1.12	0.71	0.41	0.32	RP11-245D16.4	chr13	lincRNA	--
ENSG00000256262.1	-3.15065	0.0279242	2.48229e-28	4.55172e-26	0.21	0.25	0.39	2.9	2.13	2.4	USP30-AS1	chr12	antisense	USP30 antisense RNA 1
ENSG00000276131.1	0.733114	0.948318	4.58062e-05	0.00100154	4.04	3.38	3.03	2.18	1.74	2.21	RP11-481J2.3	chr16	antisense	--
ENSG00000228812.7	-0.634834	0.260286	0.0029994	0.0329777	1.36	1.25	1.15	1.34	1.99	2.35	LAMA5-AS1	chr20	antisense	LAMA5 antisense RNA 1
ENSG00000261773.1	-1.47663	-2.29584	0.00814918	0.0710131	0.07	0.03	0.18	0.23	0.19	0.35	WI2-89031B12.1	chrX	sense_overlapping	--
ENSG00000144035.3	-3.35231	0.331254	5.6309e-36	1.37952e-33	0.23	0.11	0.3	2.62	2.2	1.69	NAT8	chr2	protein_coding	N-acetyltransferase 8 (GCN5-related, putative)
ENSG00000145623.12	-0.59263	6.60012	1.40687e-08	6.44939e-07	11.26	12.6	12.77	19.1	18.1	16.7	OSMR	chr5	protein_coding	oncostatin M receptor
ENSG00000261173.1	-0.979699	-1.28022	0.00847649	0.0729916	0.37	0.47	0.49	0.56	1.03	0.98	RP11-169E6.1	chr16	antisense	--
ENSG00000274735.1	-4.37186	-1.73561	2.31595e-12	1.67606e-10	0.98	0	0	0.47	22.2	0.45	FP236383.3	chr21	miRNA	--
ENSG00000173110.7	4.8602	5.12874	4.06861e-276	6.08034e-272	30.14	31.17	21.83	1.04	0.82	0.93	HSPA6	chr1	protein_coding	heat shock 70kDa protein 6 (HSP70B')
ENSG00000127241.16	-5.01237	-3.1706	0.000529739	0.00812385	0	0	0	0.01	0.02	0.01	MASP1	chr3	protein_coding	mannan-binding lectin serine peptidase 1 (C4/C2 activating component of Ra-reactive factor)
ENSG00000121858.10	-2.82851	4.10681	3.52725e-111	7.53043e-108	2.05	1.06	3.2	16.44	15.18	12.11	TNFSF10	chr3	protein_coding	tumor necrosis factor (ligand) superfamily, member 10
ENSG00000183723.12	0.661415	3.96125	7.17079e-09	3.4569e-07	5.18	5.12	4.3	3	2.8	3.19	CMTM4	chr16	protein_coding	CKLF-like MARVEL transmembrane domain containing 4
ENSG00000277639.1	-1.00135	0.0431167	1.83851e-05	0.000453393	0.48	0.59	0.57	0.99	1.37	0.84	RP11-295M3.4	chr16	lincRNA	--
ENSG00000270607.1	-0.894959	-0.637395	0.00202325	0.0238835	0.16	0.3	0.24	0.36	0.38	0.54	RP11-359E10.1	chr11	lincRNA	--
ENSG00000233668.1	4.67622	-3.36227	0.00408448	0.0421259	0.09	0.13	0.18	0	0	0	RP11-571F15.3	chr9	processed_pseudogene	--
ENSG00000134516.15	0.871505	-0.921642	0.00648624	0.0601698	0.1	0.1	0.05	0.03	0.05	0.05	DOCK2	chr5	protein_coding	dedicator of cytokinesis 2
ENSG00000225813.1	1.38533	-1.73162	0.0020995	0.0245092	0.54	0.41	0.51	0.22	0.21	0.11	AC009299.4	chr2	processed_pseudogene	--
ENSG00000129048.6	-3.90287	-1.36503	8.32369e-15	7.58496e-13	0.01	0.03	0.01	0.36	0.28	0.28	ACKR4	chr3	protein_coding	atypical chemokine receptor 4
ENSG00000260743.1	3.10495	-3.16949	0.00671615	0.0617468	0.09	0.03	0.07	0.02	0	0	RP11-255C15.3	chr3	lincRNA	--
ENSG00000011590.13	-3.97742	-0.30797	5.50419e-29	1.04123e-26	0	0.05	0.07	0.52	0.53	0.86	ZBTB32	chr19	protein_coding	zinc finger and BTB domain containing 32
ENSG00000187546.13	-0.99071	1.24992	5.78782e-09	2.82206e-07	0.76	0.44	0.63	1.49	1.09	0.96	AGMO	chr7	protein_coding	alkylglycerol monooxygenase
ENSG00000260966.1	1.41292	-1.31074	0.000131137	0.00250772	0.12	0.08	0.08	0.05	0.03	0.02	RP11-690D19.3	chr11	sense_overlapping	--
ENSG00000171435.13	0.972956	-0.0942696	4.65239e-05	0.00101649	0.08	0.05	0.06	0.04	0.03	0.03	KSR2	chr12	protein_coding	kinase suppressor of ras 2
ENSG00000253882.6	-0.797281	0.0308942	0.000626519	0.00934433	0.19	0.23	0.25	0.39	0.43	0.31	RP11-61L23.2	chr7	transcribed_unprocessed_pseudogene	--
ENSG00000176749.8	0.647761	2.10083	5.01336e-06	0.000142302	1.15	1.22	1.12	0.78	0.58	0.81	CDK5R1	chr17	protein_coding	cyclin-dependent kinase 5, regulatory subunit 1 (p35)
ENSG00000182782.7	-3.12804	1.47305	1.61984e-58	8.206e-56	0.24	0.22	0.32	1.94	2.25	2.48	HCAR2	chr12	protein_coding	hydroxycarboxylic acid receptor 2
ENSG00000064205.10	-0.699142	2.48991	1.67426e-07	6.51589e-06	2.34	2.1	2.36	3.07	3.84	3.83	WISP2	chr20	protein_coding	WNT1 inducible signaling pathway protein 2
ENSG00000159403.15	-1.6382	7.51907	5.02357e-54	2.30999e-51	27.14	26.6	39.64	96.97	96.11	90.49	C1R	chr12	protein_coding	complement component 1, r subcomponent
ENSG00000212864.3	-0.846215	-0.390133	0.00128102	0.0166689	0.5	0.47	0.3	0.71	0.62	0.9	RNF208	chr9	protein_coding	ring finger protein 208
ENSG00000122641.9	-2.00137	-1.24879	1.38249e-07	5.45585e-06	0.02	0.03	0.02	0.15	0.04	0.08	INHBA	chr7	protein_coding	inhibin, beta A
ENSG00000260552.1	-1.10898	0.86357	4.20547e-09	2.07764e-07	2.22	1.28	1.81	4.72	3.58	2.91	RP11-49I11.1	chr18	antisense	--
ENSG00000244649.4	-0.967807	0.50889	2.25264e-06	6.92688e-05	0.19	0.38	0.4	0.78	0.55	0.52	CTD-2377D24.6	chr17	lincRNA	--
ENSG00000165030.3	-0.636417	4.05239	2.2167e-08	9.87406e-07	6.01	5.01	7.05	10.18	8.97	8.28	NFIL3	chr9	protein_coding	nuclear factor, interleukin 3 regulated
ENSG00000138152.8	-0.590229	0.22135	0.0075908	0.0678458	0.58	0.29	0.52	0.73	0.73	0.59	BTBD16	chr10	protein_coding	BTB (POZ) domain containing 16
ENSG00000146411.5	-1.50802	1.36317	7.83101e-19	9.28813e-17	0.23	0.27	0.35	0.88	0.76	0.72	SLC2A12	chr6	protein_coding	solute carrier family 2 (facilitated glucose transporter), member 12
ENSG00000260371.1	-0.592986	0.929373	0.00102013	0.0138999	3.08	2.34	2.16	3.74	3.69	3.73	RP11-343C2.9	chr16	protein_coding	--
ENSG00000114378.16	-0.623939	1.25618	0.00019784	0.00355149	0.51	0.56	0.66	0.98	0.95	0.66	HYAL1	chr3	protein_coding	hyaluronoglucosaminidase 1
ENSG00000128383.12	-1.03599	3.18024	6.10591e-17	6.3811e-15	3.1	2.75	3.22	6.07	5.97	6.1	APOBEC3A	chr22	protein_coding	apolipoprotein B mRNA editing enzyme, catalytic polypeptide-like 3A
ENSG00000148019.12	0.760212	3.87447	3.94846e-11	2.51097e-09	1.5	1.64	1.47	1.04	0.83	0.79	CEP78	chr9	protein_coding	centrosomal protein 78kDa
ENSG00000171791.11	1.26357	-0.395116	3.05186e-06	9.11734e-05	0.11	0.13	0.14	0.07	0.03	0.05	BCL2	chr18	protein_coding	B-cell CLL/lymphoma 2
ENSG00000111266.8	-0.676905	6.22485	1.22681e-10	7.24669e-09	10.14	9.96	11.78	17.89	16.9	14.98	DUSP16	chr12	protein_coding	dual specificity phosphatase 16
ENSG00000115461.4	-1.87431	-1.04237	1.4033e-07	5.51884e-06	0.03	0.01	0.04	0.15	0.08	0.07	IGFBP5	chr2	protein_coding	insulin-like growth factor binding protein 5
ENSG00000179913.10	-0.67559	4.10029	2.55498e-09	1.29874e-07	5.84	5.22	6	8.55	8.97	9.03	B3GNT3	chr19	protein_coding	UDP-GlcNAc:betaGal beta-1,3-N-acetylglucosaminyltransferase 3
ENSG00000105499.13	-1.1618	2.07586	1.2666e-15	1.22515e-13	0.87	1.04	1.03	1.96	2.28	2.17	PLA2G4C	chr19	protein_coding	phospholipase A2, group IVC (cytosolic, calcium-independent)
ENSG00000263731.1	1.46927	2.51923	6.35399e-27	1.10415e-24	3.68	3.06	2.35	1.06	1.01	1.12	RP11-498C9.15	chr17	lincRNA	--
ENSG00000225611.1	-5.1248	-3.11155	0.000268792	0.00460924	0	0	0	0.09	0.08	0.2	RP11-70C1.1	chr3	antisense	--
ENSG00000112139.14	-0.836517	1.39334	3.19863e-07	1.1745e-05	0.17	0.17	0.15	0.28	0.29	0.28	MDGA1	chr6	protein_coding	MAM domain containing glycosylphosphatidylinositol anchor 1
ENSG00000276070.4	-4.06191	-1.97489	9.51784e-10	5.11652e-08	0	0	0.04	0.36	0.16	0.24	CCL4L2	chr17	protein_coding	chemokine (C-C motif) ligand 4-like 2
ENSG00000116663.10	-0.616649	4.12376	5.05346e-08	2.12437e-06	8.63	7.97	9.67	11.57	12.93	14.68	FBXO6	chr1	protein_coding	F-box protein 6
ENSG00000267278.5	-0.598229	0.978216	0.000748394	0.0107749	0.46	0.37	0.5	0.57	0.66	0.74	MAP3K14-AS1	chr17	antisense	MAP3K14 antisense RNA 1
ENSG00000181143.15	-2.11199	-1.77902	1.01758e-05	0.000266794	0	0	0	0.01	0.01	0.01	MUC16	chr19	protein_coding	mucin 16, cell surface associated
ENSG00000213542.3	1.36053	-1.99936	0.00669463	0.0617468	0.45	0.31	0.29	0.07	0.16	0.16	RP11-467H10.1	chr7	processed_pseudogene	--
ENSG00000279965.1	-1.93119	-1.89798	0.000100649	0.001987	0.03	0.07	0.03	0.18	0.09	0.2	RP11-472K17.3	chr13	TEC	--
ENSG00000244733.5	0.777462	1.01891	1.19867e-05	0.000309922	1.23	1.48	1.25	1.03	0.65	0.58	RP11-506M13.3	chr10	lincRNA	--
ENSG00000187775.16	-0.75333	0.144822	0.000756298	0.0108573	0.05	0.05	0.06	0.08	0.08	0.11	DNAH17	chr17	protein_coding	dynein, axonemal, heavy chain 17
ENSG00000105672.14	0.889447	-0.230083	0.000375166	0.00611081	0.64	0.55	0.44	0.3	0.34	0.22	ETV2	chr19	protein_coding	ets variant 2
ENSG00000176884.14	-1.79422	-2.11174	0.000975941	0.0134114	0.01	0.01	0.02	0.05	0.04	0.06	GRIN1	chr9	protein_coding	glutamate receptor, ionotropic, N-methyl D-aspartate 1
ENSG00000173269.13	-0.871075	-0.744419	0.00393911	0.0409659	0.09	0.04	0.12	0.19	0.14	0.12	MMRN2	chr10	protein_coding	multimerin 2
ENSG00000182885.16	-1.58278	-2.11219	0.00317312	0.0344752	0	0.05	0.04	0.08	0.14	0.06	ADGRG3	chr16	protein_coding	adhesion G protein-coupled receptor G3
ENSG00000101986.11	-0.760053	2.42368	1.82468e-08	8.26331e-07	0.99	0.92	0.85	1.46	1.53	1.56	ABCD1	chrX	protein_coding	ATP-binding cassette, sub-family D (ALD), member 1
ENSG00000213064.9	0.654729	5.2596	1.11276e-09	5.94976e-08	3.82	4.47	4	2.89	2.4	2.33	SFT2D2	chr1	protein_coding	SFT2 domain containing 2
ENSG00000261512.2	-0.916933	0.613994	3.35073e-06	9.914e-05	0.45	0.53	0.89	1.14	0.96	1.32	RP11-46D6.1	chr16	lincRNA	--
ENSG00000275302.1	-2.44816	-2.00144	7.95892e-06	0.000214117	0.03	0.09	0.06	0.5	0.36	0.17	CCL4	chr17	protein_coding	chemokine (C-C motif) ligand 4
ENSG00000148965.8	-2.53768	-2.94812	0.00454226	0.0455736	0	0.06	0	0.12	0.09	0.2	SAA4	chr11	protein_coding	serum amyloid A4, constitutive
ENSG00000256037.1	4.51337	-3.43268	0.00808871	0.0706704	0.14	0.09	0.14	0	0	0	MRPL40P1	chr12	processed_pseudogene	mitochondrial ribosomal protein L40 pseudogene 1
ENSG00000197594.11	-0.811427	2.7057	5.09772e-10	2.81118e-08	0.56	0.61	0.67	1.16	1.09	0.89	ENPP1	chr6	protein_coding	ectonucleotide pyrophosphatase/phosphodiesterase 1
ENSG00000163565.18	-1.55841	5.92008	2.10271e-47	8.26946e-45	8.31	9.19	12.94	32.5	30.84	24.25	IFI16	chr1	protein_coding	interferon, gamma-inducible protein 16
ENSG00000171303.6	-0.899277	3.29875	1.61214e-13	1.32377e-11	1.03	0.95	1.22	1.87	1.99	1.94	KCNK3	chr2	protein_coding	potassium channel, two pore domain subfamily K, member 3
ENSG00000134363.11	-1.14935	1.59944	3.79378e-13	3.01575e-11	0.7	0.62	0.6	1.34	1.38	1.45	FST	chr5	protein_coding	follistatin
ENSG00000171388.11	0.668957	1.13446	0.000109577	0.00214201	0.65	0.77	0.97	0.49	0.4	0.58	APLN	chrX	protein_coding	apelin
ENSG00000280734.2	-1.03131	1.36817	5.26034e-10	2.89019e-08	0.32	0.31	0.43	0.72	0.64	0.76	LINC01232	chr13	processed_transcript	long intergenic non-protein coding RNA 1232
ENSG00000158445.7	1.11963	-1.48721	0.003791	0.0396602	0.03	0.03	0.04	0.02	0.01	0.01	KCNB1	chr20	protein_coding	potassium channel, voltage gated Shab related subfamily B, member 1
ENSG00000129991.12	-0.636996	1.5817	4.37162e-05	0.000963595	1.94	2.72	2.58	3.61	3.5	3.88	TNNI3	chr19	protein_coding	troponin I type 3 (cardiac)
ENSG00000275793.1	-0.847249	-0.861283	0.00611722	0.0575685	0.06	0.06	0.05	0.11	0.09	0.1	RIMBP3	chr22	protein_coding	RIMS binding protein 3
ENSG00000166035.10	-2.47249	-2.39817	0.000134251	0.00255419	0.01	0	0.02	0.03	0.06	0.04	LIPC	chr15	protein_coding	lipase, hepatic
ENSG00000196358.10	-1.39334	0.286136	3.7735e-10	2.10815e-08	0.09	0.07	0.09	0.27	0.19	0.18	NTNG2	chr9	protein_coding	netrin G2
ENSG00000233586.1	1.87572	-2.43221	0.00432505	0.0440118	0.48	0.26	0.44	0.1	0.1	0.1	RP11-763B22.3	chr1	processed_pseudogene	--
ENSG00000169418.9	-1.04335	0.0686815	7.29163e-06	0.000198669	0.08	0.22	0.14	0.27	0.29	0.32	NPR1	chr1	protein_coding	natriuretic peptide receptor 1
ENSG00000146666.5	-0.996283	-0.669054	0.000699909	0.0102047	0.26	0.27	0.41	0.49	0.81	0.51	LINC00525	chr7	antisense	long intergenic non-protein coding RNA 525
ENSG00000172367.15	-1.47694	-2.29638	0.00814918	0.0710131	0.03	0.04	0.01	0.11	0.07	0.03	PDZD3	chr11	protein_coding	PDZ domain containing 3
ENSG00000157856.10	-1.48125	-2.17066	0.00710944	0.064556	0.06	0.02	0.02	0.1	0.09	0.09	DRC1	chr2	protein_coding	dynein regulatory complex subunit 1
ENSG00000198774.4	-0.735426	2.51516	3.72756e-08	1.60307e-06	0.63	0.59	0.96	1.51	1.1	0.94	RASSF9	chr12	protein_coding	Ras association (RalGDS/AF-6) domain family (N-terminal) member 9
ENSG00000154451.14	-2.72805	-0.392262	1.43286e-18	1.64719e-16	0	0.09	0.17	0.55	0.57	0.59	GBP5	chr1	protein_coding	guanylate binding protein 5
ENSG00000151835.13	0.592802	3.67475	3.67649e-07	1.32713e-05	0.83	1.01	0.98	0.81	0.57	0.44	SACS	chr13	protein_coding	sacsin molecular chaperone
ENSG00000183150.7	-0.692651	0.828254	0.000206106	0.00368659	0.6	0.56	0.82	1.25	0.93	0.95	GPR19	chr12	protein_coding	G protein-coupled receptor 19
ENSG00000141505.11	-1.29343	1.83052	4.20068e-17	4.43654e-15	1.19	0.27	1.01	3.69	1.45	0.84	ASGR1	chr17	protein_coding	asialoglycoprotein receptor 1
ENSG00000275185.1	0.593964	0.801291	0.00126879	0.0165746	2.85	4.13	3.97	3.07	2.25	1.78	RP13-753N3.3	chr17	antisense	--
ENSG00000222017.1	-2.21676	-2.80141	0.00488174	0.0481323	0.03	0.05	0	0.05	0.17	0.17	AC011997.1	chr2	antisense	--
ENSG00000128203.6	-0.593486	0.974244	0.000849458	0.0119311	0.39	0.45	0.48	0.57	0.66	0.69	ASPHD2	chr22	protein_coding	aspartate beta-hydroxylase domain containing 2
ENSG00000088881.20	-1.18377	0.878046	3.49569e-10	1.9751e-08	0.4	0.25	0.4	0.79	0.81	0.73	EBF4	chr20	protein_coding	early B-cell factor 4
ENSG00000122729.18	1.15653	4.29596	1.18838e-24	1.95162e-22	3.81	3.9	2.73	1.57	1.5	1.49	ACO1	chr9	protein_coding	aconitase 1, soluble
ENSG00000185507.19	-0.890255	7.47468	1.15722e-17	1.23972e-15	54.9	48.92	65.71	90.85	105.1	109.96	IRF7	chr11	protein_coding	interferon regulatory factor 7
ENSG00000138135.6	-2.71887	-1.09898	9.58197e-12	6.40706e-10	0	0.05	0.13	0.33	0.44	0.42	CH25H	chr10	protein_coding	cholesterol 25-hydroxylase
ENSG00000119917.13	-1.91306	8.49106	1.69243e-72	1.07628e-69	46.62	44.45	75.4	226.36	208.38	177.85	IFIT3	chr10	protein_coding	interferon-induced protein with tetratricopeptide repeats 3
ENSG00000244242.1	-0.684631	1.47175	2.0077e-05	0.000489065	0.63	0.44	0.57	0.71	0.81	1.03	IFITM10	chr11	protein_coding	interferon induced transmembrane protein 10
ENSG00000260454.1	-2.08364	-2.62624	0.00296531	0.0326695	0	0.02	0.06	0.17	0.11	0.07	RP11-367F23.2	chr9	lincRNA	--
ENSG00000188779.10	-2.96729	-2.71125	0.000261745	0.0045117	0	0	0.01	0.05	0.04	0.02	SKOR1	chr15	protein_coding	SKI family transcriptional corepressor 1
ENSG00000207110.1	0.891009	-1.09588	0.00848057	0.0730057	2.69	3.62	3.28	1.61	1.55	1.86	RNU1-106P	chr8	snRNA	RNA, U1 small nuclear 106, pseudogene
ENSG00000200087.1	-0.662089	-0.224364	0.00853107	0.0733137	3.51	1.98	3.33	5.05	4.23	4.35	SNORA73B	chr1	snoRNA	small nucleolar RNA, H/ACA box 73B
ENSG00000254859.1	-1.85426	-1.4341	9.42263e-06	0.000249012	0.17	0.22	0.4	0.42	0.87	1.48	RP11-661A12.5	chr8	antisense	--
ENSG00000242338.6	2.28132	-2.58501	0.00179343	0.0217108	0.03	0.19	0.06	0.04	0.01	0	BMS1P4	chr10	transcribed_unprocessed_pseudogene	BMS1 ribosome biogenesis factor pseudogene 4
ENSG00000103540.16	0.662884	2.814	2.00445e-07	7.71055e-06	1.41	1.6	1.39	1.21	0.83	0.68	CCP110	chr16	protein_coding	centriolar coiled coil protein 110kDa
ENSG00000103089.8	-0.943584	5.33099	1.98082e-18	2.26838e-16	9.07	12.19	11.79	19.81	20.09	21.95	FA2H	chr16	protein_coding	fatty acid 2-hydroxylase
ENSG00000249641.2	-0.925271	-1.04219	0.00562994	0.054055	0.25	0.21	0.14	0.21	0.56	0.36	HOXC13-AS	chr12	antisense	HOXC13 antisense RNA
ENSG00000142273.10	-4.89119	-3.23182	0.00104527	0.0141624	0	0	0	0.05	0.05	0.08	CBLC	chr19	protein_coding	Cbl proto-oncogene C, E3 ubiquitin protein ligase
ENSG00000080031.9	-0.854771	2.45821	2.49792e-10	1.43854e-08	0.81	1.12	0.97	1.76	1.64	1.72	PTPRH	chr19	protein_coding	protein tyrosine phosphatase, receptor type, H
ENSG00000175121.11	-2.43325	-3.00051	0.00791611	0.0699806	0.05	0	0	0.13	0.1	0.1	WFDC5	chr20	protein_coding	WAP four-disulfide core domain 5
ENSG00000102970.10	-4.14522	0.427101	7.4858e-47	2.79679e-44	0.22	0.13	0.27	4.04	4.05	2.94	CCL17	chr16	protein_coding	chemokine (C-C motif) ligand 17
ENSG00000183496.5	0.692933	0.820979	0.000168599	0.0031049	0.58	0.43	0.4	0.42	0.26	0.18	MEX3B	chr15	protein_coding	mex-3 RNA binding family member B
ENSG00000129422.13	-0.653898	6.77303	3.70358e-10	2.07685e-08	11.49	8.59	12.81	20.4	17.01	13.25	MTUS1	chr8	protein_coding	microtubule associated tumor suppressor 1
ENSG00000147394.18	0.616696	4.58947	2.23001e-08	9.91481e-07	5.66	6.91	5.2	3.86	3.44	3.99	ZNF185	chrX	protein_coding	zinc finger protein 185 (LIM domain)
ENSG00000134470.19	-1.38138	3.53501	5.63223e-30	1.11485e-27	1.65	2.1	2.41	4.57	5.29	5.77	IL15RA	chr10	protein_coding	interleukin 15 receptor, alpha
ENSG00000261730.1	0.84005	-0.871624	0.00774563	0.0689484	0.37	0.61	0.47	0.39	0.2	0.2	RP4-668J24.2	chr6	antisense	--
ENSG00000180720.7	-1.39862	-2.00058	0.00535709	0.0520371	0.02	0.05	0.13	0.24	0.12	0.17	CHRM4	chr11	protein_coding	cholinergic receptor, muscarinic 4
ENSG00000275209.1	1.49057	-0.366249	3.31142e-08	1.4365e-06	8.43	10.46	45.66	8.62	6.73	6.73	FP236383.4	chr21	miRNA	--
ENSG00000197272.2	-5.01228	-3.17065	0.000529739	0.00812385	0	0	0	0.1	0.17	0.02	IL27	chr16	protein_coding	interleukin 27
ENSG00000257335.8	0.977943	1.0066	3.88929e-08	1.66305e-06	0.28	0.28	0.26	0.19	0.13	0.1	MGAM	chr7	protein_coding	maltase-glucoamylase
ENSG00000163683.11	-0.884302	4.46052	2.19108e-15	2.08565e-13	2.19	1.78	2.96	4.99	4.09	3.43	SMIM14	chr4	protein_coding	small integral membrane protein 14
ENSG00000165695.9	-1.42183	-0.814255	8.03964e-06	0.0002159	0.05	0.16	0.18	0.43	0.29	0.29	AK8	chr9	protein_coding	adenylate kinase 8
ENSG00000188282.12	-3.138	0.964677	2.1572e-46	7.58549e-44	0.09	0.08	0.2	1.04	1.09	1.08	RUFY4	chr2	protein_coding	RUN and FYVE domain containing 4
ENSG00000095932.6	-2.44854	-2.00118	7.95892e-06	0.000214117	0.06	0.04	0.02	0.23	0.17	0.22	SMIM24	chr19	protein_coding	small integral membrane protein 24
ENSG00000272622.1	1.61477	-2.05372	0.00188141	0.0225928	0.71	0.37	0.34	0.05	0.22	0.17	RP11-395N3.2	chr2	lincRNA	--
ENSG00000172936.12	-0.680882	7.18464	5.73363e-11	3.57026e-09	36.69	34.43	42.07	57.88	58.79	60.17	MYD88	chr3	protein_coding	myeloid differentiation primary response 88
ENSG00000151012.13	0.610004	6.29417	6.11763e-09	2.97801e-07	9.69	9.8	9.13	7.33	6.11	4.91	SLC7A11	chr4	protein_coding	solute carrier family 7 (anionic amino acid transporter light chain, xc- system), member 11
ENSG00000129226.13	-1.50639	3.55402	4.25691e-35	9.86316e-33	2.57	2.83	4.03	8.15	8.65	9.25	CD68	chr17	protein_coding	CD68 molecule
ENSG00000129451.11	-2.21037	1.0033	3.09282e-29	5.92573e-27	0.15	0.11	0.34	1.03	0.91	0.75	KLK10	chr19	protein_coding	kallikrein-related peptidase 10
ENSG00000228989.1	1.04315	0.561853	1.5183e-07	5.96327e-06	4.51	4.03	4.98	1.91	1.89	2.57	AC133528.2	chr2	antisense	--
ENSG00000180767.9	-0.711794	0.293429	0.00112189	0.0149497	0.4	0.36	0.68	0.8	0.88	0.62	CHST13	chr3	protein_coding	carbohydrate (chondroitin 4) sulfotransferase 13
ENSG00000245975.2	-0.773547	-0.536666	0.00526831	0.0512914	0.43	0.23	0.3	0.57	0.47	0.58	RP11-30K9.6	chr15	lincRNA	--
ENSG00000266970.1	-1.60256	-0.690845	1.89254e-07	7.3083e-06	0.28	0.18	0.21	0.58	0.66	0.77	RP11-806H10.4	chr17	lincRNA	--
ENSG00000050438.16	0.872731	0.054719	0.00014094	0.00266617	0.1	0.09	0.09	0.05	0.04	0.06	SLC4A8	chr12	protein_coding	solute carrier family 4, sodium bicarbonate cotransporter, member 8
ENSG00000139567.12	-2.45965	0.552177	2.54702e-27	4.47811e-25	0.08	0.08	0.13	0.55	0.47	0.51	ACVRL1	chr12	protein_coding	activin A receptor type II-like 1
ENSG00000110427.14	0.722263	2.55754	5.36438e-08	2.25191e-06	0.48	0.73	0.52	0.33	0.32	0.37	KIAA1549L	chr11	protein_coding	KIAA1549-like
ENSG00000237883.1	0.738447	2.08278	2.31483e-07	8.72482e-06	6.27	6.52	4.85	3.17	3.49	3.63	DGUOK-AS1	chr2	antisense	DGUOK antisense RNA 1
ENSG00000235169.7	-0.870536	-0.398666	0.00128102	0.0166689	0.68	0.4	0.89	1.01	1.49	1	SMIM1	chr1	protein_coding	small integral membrane protein 1 (Vel blood group)
ENSG00000162426.14	-0.976797	3.17207	3.35152e-15	3.14024e-13	1.9	1.82	2.58	3.73	3.88	4.45	SLC45A1	chr1	protein_coding	solute carrier family 45, member 1
ENSG00000160352.15	0.619413	1.40812	0.000110131	0.00215004	0.38	0.42	0.49	0.39	0.23	0.2	ZNF714	chr19	protein_coding	zinc finger protein 714
ENSG00000202515.1	1.63716	-0.894698	3.66673e-07	1.32521e-05	10.22	6.67	7.32	2.37	1.71	3.42	VTRNA1-3	chr5	misc_RNA	vault RNA 1-3
ENSG00000143412.9	-0.586808	1.07385	0.000854008	0.0119663	1.03	0.59	0.99	1.42	1.06	1.35	ANXA9	chr1	protein_coding	annexin A9
ENSG00000183807.7	-2.43473	-2.20136	5.40102e-05	0.00115804	0.08	0.03	0.03	0.36	0.22	0.17	FAM162B	chr6	protein_coding	family with sequence similarity 162, member B
ENSG00000278765.1	1.79346	-1.94656	0.000356339	0.00585198	0.56	0.46	0.58	0.13	0.17	0.13	RP5-890E16.5	chr17	lincRNA	--
ENSG00000137752.22	-2.61429	3.18215	1.08752e-81	8.33459e-79	0.78	0.7	1.27	6.48	5.45	4.54	CASP1	chr11	protein_coding	caspase 1, apoptosis-related cysteine peptidase
ENSG00000007255.10	-0.771714	4.06242	1.22571e-11	8.12311e-10	14.31	12.54	17.62	24.07	25.18	24.72	TRAPPC6A	chr19	protein_coding	trafficking protein particle complex 6A
ENSG00000124762.13	-0.778089	7.51031	6.62621e-14	5.64247e-12	51.18	51.56	53.11	81.65	88.08	90.55	CDKN1A	chr6	protein_coding	cyclin-dependent kinase inhibitor 1A (p21, Cip1)
ENSG00000064763.10	-2.35143	-1.89833	5.46056e-06	0.00015325	0.02	0.01	0.02	0.08	0.13	0.06	FAR2	chr12	protein_coding	fatty acyl CoA reductase 2
ENSG00000253958.1	-0.746763	3.97109	6.80265e-11	4.17504e-09	5.02	5.05	5.59	8.63	8.87	8.12	CLDN23	chr8	protein_coding	claudin 23
ENSG00000180573.9	-0.801937	4.64946	3.54221e-13	2.84605e-11	10.09	10.12	11.92	20.25	18.19	16.25	HIST1H2AC	chr6	protein_coding	histone cluster 1, H2ac
ENSG00000258441.1	1.28355	0.94594	3.72317e-12	2.63701e-10	1.56	1.58	1.27	0.67	0.59	0.5	LINC00641	chr14	processed_transcript	long intergenic non-protein coding RNA 641
ENSG00000096996.15	-5.73149	-2.7558	2.40617e-06	7.3611e-05	0	0	0	0.04	0.05	0.05	IL12RB1	chr19	protein_coding	interleukin 12 receptor, beta 1
ENSG00000050344.8	-1.31598	5.49118	4.48681e-34	1.02371e-31	5.85	6.79	7.7	17.19	16.46	15.72	NFE2L3	chr7	protein_coding	nuclear factor, erythroid 2-like 3
ENSG00000272864.1	4.67558	-3.36258	0.00408448	0.0421259	0.1	0.29	0.05	0	0	0	RP11-17E13.2	chr1	lincRNA	--
ENSG00000176532.3	-1.43366	4.3926	1.00788e-36	2.51037e-34	6.39	4.76	8.47	17.65	17.93	16.11	PRR15	chr7	protein_coding	proline rich 15
ENSG00000115155.16	-2.48869	-0.887508	5.52657e-12	3.80607e-10	0.03	0.01	0.02	0.11	0.14	0.07	OTOF	chr2	protein_coding	otoferlin
ENSG00000116962.14	-0.609185	1.85093	3.65145e-05	0.000826804	0.52	0.45	0.43	0.71	0.68	0.68	NID1	chr1	protein_coding	nidogen 1
ENSG00000179604.9	-0.600628	6.79372	8.33034e-09	3.93965e-07	26.04	24.38	28.01	37.69	39.28	38.94	CDC42EP4	chr17	protein_coding	CDC42 effector protein (Rho GTPase binding) 4
ENSG00000258603.3	-2.30226	-2.75563	0.00288816	0.0320075	0.03	0.06	0	0.2	0.14	0.14	RP3-414A15.10	chr14	antisense	--
ENSG00000175311.6	-0.655806	1.75894	1.46123e-05	0.000369553	0.81	0.27	0.65	1.19	0.85	0.63	ANKS4B	chr16	protein_coding	ankyrin repeat and sterile alpha motif domain containing 4B
ENSG00000166920.10	-1.95225	5.17016	5.88728e-69	3.59112e-66	10.87	15.54	18.69	52.18	58.11	59.51	C15orf48	chr15	protein_coding	chromosome 15 open reading frame 48
ENSG00000275632.1	0.957956	1.14914	3.04882e-08	1.33226e-06	4.84	6.03	5.08	2.52	2.71	2.76	RP5-967N21.11	chr20	lincRNA	--
ENSG00000125246.15	-0.892189	1.67164	9.69587e-09	4.54232e-07	0.31	0.26	0.37	0.6	0.58	0.52	CLYBL	chr13	protein_coding	citrate lyase beta like
ENSG00000188206.6	0.602964	1.85399	4.31183e-05	0.00095182	0.83	0.82	0.86	0.51	0.57	0.53	HNRNPU-AS1	chr1	antisense	HNRNPU antisense RNA 1
ENSG00000119326.14	0.635309	5.06065	4.25612e-09	2.0992e-07	13.38	16.36	13.1	9.47	8.83	8.59	CTNNAL1	chr9	protein_coding	catenin (cadherin-associated protein), alpha-like 1
ENSG00000060656.19	-0.852881	4.31002	3.0715e-14	2.68433e-12	2.45	2.13	2.69	4.23	4.25	4.32	PTPRU	chr1	protein_coding	protein tyrosine phosphatase, receptor type, U
ENSG00000205436.7	-0.881303	-0.1127	0.000339355	0.00561938	0.25	0.15	0.37	0.38	0.64	0.36	EXOC3L4	chr14	protein_coding	exocyst complex component 3-like 4
ENSG00000280046.1	1.65916	-1.64497	0.000169518	0.0031199	0.05	0.05	0.07	0.03	0.01	0.01	RP11-1099M24.6	chr17	TEC	--
ENSG00000170298.15	-2.7324	-2.23215	1.57477e-05	0.000395533	0.03	0	0.03	0.15	0.1	0.19	LGALS9B	chr17	protein_coding	lectin, galactoside-binding, soluble, 9B
ENSG00000173221.13	-0.721633	6.63849	5.28177e-12	3.65432e-10	37.93	28.9	41.58	64.51	59.35	50.87	GLRX	chr5	protein_coding	glutaredoxin (thioltransferase)
ENSG00000225975.6	0.735384	0.69403	0.000139425	0.00264253	2.35	2.27	1.87	1.11	1.44	1.24	LINC01534	chr19	lincRNA	long intergenic non-protein coding RNA 1534
ENSG00000165376.10	-1.00111	7.23953	9.27707e-22	1.2778e-19	34.55	18.52	32.74	69.72	55.4	43.27	CLDN2	chrX	protein_coding	claudin 2
ENSG00000258713.2	-2.96771	-2.71125	0.000261745	0.0045117	0	0.04	0.04	0.07	0.27	0.3	C20orf141	chr20	protein_coding	chromosome 20 open reading frame 141
ENSG00000014914.19	-0.820922	3.32702	1.42987e-11	9.37224e-10	2.23	1.98	2.83	4.17	4.12	3.84	MTMR11	chr1	protein_coding	myotubularin related protein 11
ENSG00000189431.7	-0.663092	3.2575	5.02383e-08	2.11489e-06	2.49	3.36	2.61	4.29	4.39	4.38	RASSF10	chr11	protein_coding	Ras association (RalGDS/AF-6) domain family (N-terminal) member 10
ENSG00000137842.6	-1.00751	5.0656	2.12269e-20	2.72297e-18	7.57	6.8	8.96	15.83	15.47	14.45	TMEM62	chr15	protein_coding	transmembrane protein 62
ENSG00000144668.11	4.51403	-3.43236	0.00808871	0.0706704	0	0	0.03	0	0	0	ITGA9	chr3	protein_coding	integrin, alpha 9
ENSG00000197249.12	-1.65212	3.21102	1.98533e-38	5.25128e-36	1.24	0.61	1.35	5.35	2.53	1.98	SERPINA1	chr14	protein_coding	serpin peptidase inhibitor, clade A (alpha-1 antiproteinase, antitrypsin), member 1
ENSG00000257767.2	-0.733408	5.28764	9.19164e-12	6.17368e-10	39.32	31.53	37.89	65.89	60.73	50.09	RP11-162P23.2	chr12	protein_coding	--
ENSG00000001617.11	-1.18522	5.10615	1.69694e-27	3.01904e-25	4.65	4.51	5.71	10.22	10.86	11.85	SEMA3F	chr3	protein_coding	sema domain, immunoglobulin domain (Ig), short basic domain, secreted, (semaphorin) 3F
ENSG00000183569.17	-2.48778	-1.97516	4.77952e-06	0.000136442	0.02	0.09	0	0.26	0.25	0.16	SERHL2	chr22	protein_coding	serine hydrolase-like 2
ENSG00000235091.1	-2.99216	-3.1703	0.00671615	0.0617468	0	0	0.04	0.13	0.06	0.16	WI2-85898F10.1	chr22	lincRNA	--
ENSG00000124772.11	-2.89149	-2.75544	0.000466963	0.00733038	0.01	0	0	0.04	0.02	0.06	CPNE5	chr6	protein_coding	copine V
ENSG00000155363.18	-1.05334	6.06387	3.26893e-23	4.98495e-21	8.8	8.51	10.96	18.06	19.58	19.52	MOV10	chr1	protein_coding	Mov10 RISC complex RNA helicase
ENSG00000133466.13	-0.62249	4.0803	4.26354e-08	1.80927e-06	4.47	3.09	5.17	6.42	6.55	6.14	C1QTNF6	chr22	protein_coding	C1q and tumor necrosis factor related protein 6
ENSG00000204525.14	-1.71524	8.54359	2.19878e-59	1.13309e-56	73.98	81.82	111.64	276.69	286.11	292.68	HLA-C	chr6	protein_coding	major histocompatibility complex, class I, C
ENSG00000270722.1	-1.27069	0.281345	8.97807e-09	4.22592e-07	6.89	2.14	2.94	7.4	9.59	11.13	U1	chr1	snRNA	--
ENSG00000090661.11	-0.669547	1.95384	4.58683e-06	0.00013157	1.75	1.4	1.51	2.41	2.58	2.24	CERS4	chr19	protein_coding	ceramide synthase 4
ENSG00000083457.11	0.819438	4.63856	1.05802e-13	8.83331e-12	8.64	7.71	7.61	4.43	4.44	4.37	ITGAE	chr17	protein_coding	integrin, alpha E (antigen CD103, human mucosal lymphocyte antigen 1; alpha polypeptide)
ENSG00000105404.10	-0.724982	6.97256	3.47256e-12	2.47122e-10	98.08	94	100.15	142.62	156.75	170.75	RABAC1	chr19	protein_coding	Rab acceptor 1 (prenylated)
ENSG00000160460.15	-0.621806	1.88984	2.72431e-05	0.000641156	0.34	0.23	0.34	0.54	0.47	0.36	SPTBN4	chr19	protein_coding	spectrin, beta, non-erythrocytic 4
ENSG00000183160.8	-4.75849	-3.29593	0.002065	0.0242138	0	0	0	0.03	0.03	0.04	TMEM119	chr12	protein_coding	transmembrane protein 119
ENSG00000137496.17	-3.38988	3.67744	1.08336e-133	4.62579e-130	0.46	0.31	0.78	5.19	5.24	5.39	IL18BP	chr11	protein_coding	interleukin 18 binding protein
ENSG00000141293.15	-1.64366	-2.20098	0.00355469	0.0377295	0.03	0.01	0.08	0.14	0.14	0.1	SKAP1	chr17	protein_coding	src kinase associated phosphoprotein 1
ENSG00000267317.2	-0.755692	2.89883	2.49398e-09	1.27206e-07	6.2	5.07	6.31	8.9	9.47	10.52	CTB-25B13.12	chr19	antisense	--
ENSG00000178623.11	-1.18897	-0.120352	1.94831e-06	6.0786e-05	0.14	0.04	0.12	0.29	0.23	0.14	GPR35	chr2	protein_coding	G protein-coupled receptor 35
ENSG00000227906.7	-1.04774	-1.098	0.00232097	0.0268116	0.08	0.06	0.03	0.12	0.11	0.13	SNAP25-AS1	chr20	antisense	SNAP25 antisense RNA 1
ENSG00000268510.1	-2.00576	-1.84919	4.06549e-05	0.000904792	0.22	0.16	0.11	0.58	0.66	0.76	IFNL3P1	chr19	unprocessed_pseudogene	interferon, lambda 3 pseudogene 1
ENSG00000137251.15	-2.43332	-3.0004	0.00791611	0.0699806	0.01	0	0.01	0.05	0.04	0.07	TINAG	chr6	protein_coding	tubulointerstitial nephritis antigen
ENSG00000108375.12	-0.800393	5.2525	1.12699e-13	9.35681e-12	3.68	3.08	4.2	6.55	6.33	5.77	RNF43	chr17	protein_coding	ring finger protein 43
ENSG00000221883.2	-0.831175	0.089098	0.000273447	0.00467032	0.52	0.3	0.5	0.69	0.79	0.79	ARIH2OS	chr3	protein_coding	ariadne homolog 2 opposite strand
ENSG00000060566.13	-1.94181	-0.196073	4.09803e-13	3.23182e-11	0.11	0.09	0.17	0.56	0.47	0.36	CREB3L3	chr19	protein_coding	cAMP responsive element binding protein 3-like 3
ENSG00000244701.1	0.694647	-0.124198	0.00432677	0.0440118	1.43	1.26	1.36	0.79	0.99	0.66	RP5-894A10.2	chr7	antisense	--
ENSG00000105737.9	-1.17258	-0.372523	1.00381e-05	0.000264343	0.07	0.09	0.12	0.21	0.12	0.28	GRIK5	chr19	protein_coding	glutamate receptor, ionotropic, kainate 5
ENSG00000165949.12	-2.27035	9.60423	2.03819e-99	2.53832e-96	221.58	249.42	470	1485.68	1456.44	1483.53	IFI27	chr14	protein_coding	interferon, alpha-inducible protein 27
ENSG00000047457.13	-1.47093	5.60213	5.01127e-42	1.46845e-39	5.51	4.18	6.32	20.16	14.17	9.22	CP	chr3	protein_coding	ceruloplasmin (ferroxidase)
ENSG00000275993.2	-0.632867	5.30916	3.70776e-09	1.84116e-07	5.88	6.37	6.96	10.03	9.46	9.56	CH507-42P11.8	chr21	protein_coding	--
ENSG00000148702.14	-0.959197	0.0940196	2.85802e-05	0.000666329	0.28	0.2	0.15	0.6	0.4	0.21	HABP2	chr10	protein_coding	hyaluronan binding protein 2
ENSG00000140323.5	-0.645125	1.71523	1.98435e-05	0.000483771	0.16	0.21	0.21	0.26	0.31	0.32	DISP2	chr15	protein_coding	dispatched homolog 2 (Drosophila)
ENSG00000158315.10	-1.30783	0.585536	1.13474e-10	6.72939e-09	0.3	0.3	0.26	0.51	0.73	0.83	RHBDL2	chr1	protein_coding	rhomboid, veinlet-like 2 (Drosophila)
ENSG00000234362.5	-1.165	3.24959	4.24265e-21	5.6611e-19	7.96	8.31	10.22	19.26	18.51	20.08	AC104654.2	chr2	lincRNA	--
ENSG00000277496.1	-1.46356	-1.6059	0.0008945	0.0124468	0.02	0.06	0.16	0.31	0.13	0.2	RP11-93B14.9	chr20	antisense	--
ENSG00000118596.11	0.941865	0.44168	4.11191e-06	0.000118745	0.14	0.15	0.12	0.09	0.08	0.04	SLC16A7	chr12	protein_coding	solute carrier family 16 (monocarboxylate transporter), member 7
ENSG00000279329.1	-1.00613	-0.265468	6.77197e-05	0.00140366	0.28	0.27	0.24	0.48	0.67	0.42	CTD-2553L13.9	chr19	TEC	--
ENSG00000173227.13	-0.823333	2.38383	1.54025e-09	8.04833e-08	0.71	0.7	0.82	1.08	1.32	1.44	SYT12	chr11	protein_coding	synaptotagmin XII
ENSG00000213671.3	4.51359	-3.43257	0.00808871	0.0706704	0.07	0.02	0.09	0	0	0	OLA1P2	chr17	processed_pseudogene	Obg-like ATPase 1 pseudogene 2
ENSG00000128917.6	-3.29436	-1.38194	1.65439e-12	1.21494e-10	0.02	0.02	0.01	0.12	0.16	0.22	DLL4	chr15	protein_coding	delta-like 4 (Drosophila)
ENSG00000272540.1	0.698221	-0.0670097	0.00358811	0.0379762	1.92	1.26	1.03	0.89	0.82	0.82	XXbac-BPG252P9.9	chr6	antisense	--
ENSG00000130600.15	-0.91277	4.04791	1.36375e-15	1.31488e-13	6.34	3.97	6.04	10.51	10.45	9.09	H19	chr11	processed_transcript	H19, imprinted maternally expressed transcript (non-protein coding)
ENSG00000156500.14	-1.62745	0.0811733	1.29482e-11	8.54321e-10	0.12	0.09	0.22	0.38	0.48	0.42	FAM122C	chrX	protein_coding	family with sequence similarity 122C
ENSG00000164199.15	-1.18733	-0.098948	1.75355e-06	5.54037e-05	0.03	0.03	0.03	0.08	0.04	0.05	ADGRV1	chr5	protein_coding	adhesion G protein-coupled receptor V1
ENSG00000153029.14	-1.01286	3.76191	4.00485e-18	4.44985e-16	1.16	1.01	1.15	2.23	2.31	1.98	MR1	chr1	protein_coding	major histocompatibility complex, class I-related
ENSG00000181218.5	-0.851967	3.41117	1.46129e-12	1.08919e-10	8.03	7.72	8.76	13.71	14.37	15.01	HIST3H2A	chr1	protein_coding	histone cluster 3, H2a
ENSG00000111275.12	-0.724651	7.31715	3.06096e-12	2.18873e-10	12.69	10.18	13.55	22.44	19.49	16.92	ALDH2	chr12	protein_coding	aldehyde dehydrogenase 2 family (mitochondrial)
ENSG00000179750.15	-0.722226	4.50256	7.50696e-11	4.56048e-09	8.11	8.01	10.08	13.38	14.14	14.57	APOBEC3B	chr22	protein_coding	apolipoprotein B mRNA editing enzyme, catalytic polypeptide-like 3B
ENSG00000225265.1	-0.634073	0.138731	0.00453232	0.0455503	0.47	0.56	0.74	0.92	0.81	0.94	TAF1A-AS1	chr1	antisense	TAF1A antisense RNA 1
ENSG00000184206.11	1.02247	0.548023	2.86382e-07	1.06331e-05	0.34	0.37	0.5	0.29	0.16	0.14	GOLGA6L4	chr15	protein_coding	golgin A6 family-like 4
ENSG00000182326.14	-1.36031	7.37966	2.81139e-38	7.37101e-36	21.75	22.92	29.42	65.99	63.63	56.07	C1S	chr12	protein_coding	complement component 1, s subcomponent
ENSG00000163220.10	-0.645333	1.36943	8.87755e-05	0.00178561	2.53	2.81	4.61	6.95	4.92	3.34	S100A9	chr1	protein_coding	S100 calcium binding protein A9
ENSG00000168350.7	-1.12323	-0.556572	7.27986e-05	0.00149648	0.09	0.06	0.1	0.22	0.15	0.19	DEGS2	chr14	protein_coding	delta(4)-desaturase, sphingolipid 2
ENSG00000128016.5	-0.677413	5.43125	2.44838e-10	1.41273e-08	16.09	15.46	17.52	24.73	26.21	25.55	ZFP36	chr19	protein_coding	ZFP36 ring finger protein
ENSG00000139540.11	-2.99177	-3.1705	0.00671615	0.0617468	0	0	0.01	0.05	0.07	0.01	SLC39A5	chr12	protein_coding	solute carrier family 39 (zinc transporter), member 5
ENSG00000157884.10	-2.30191	-2.75567	0.00288816	0.0320075	0.07	0.03	0	0.17	0.26	0.13	CIB4	chr2	protein_coding	calcium and integrin binding family member 4
ENSG00000166426.7	-0.678552	1.13376	7.63382e-05	0.00155958	1.78	2.34	2.05	3.01	3.29	3.35	CRABP1	chr15	protein_coding	cellular retinoic acid binding protein 1
ENSG00000106733.20	-0.975129	2.23204	4.06807e-12	2.85424e-10	1.37	1.44	1.57	2.89	2.89	2.61	NMRK1	chr9	protein_coding	nicotinamide riboside kinase 1
ENSG00000220842.6	0.717727	-0.514896	0.00974781	0.0813833	1.48	1.4	1.99	1.48	0.68	0.73	RP11-572P18.1	chr10	processed_pseudogene	--
ENSG00000107518.16	1.28053	-1.8715	0.00699558	0.0637667	0.02	0.04	0.04	0.02	0.01	0.01	ATRNL1	chr10	protein_coding	attractin-like 1
ENSG00000047617.14	-5.86643	-2.66846	6.32036e-07	2.19662e-05	0	0	0	0.03	0.06	0.04	ANO2	chr12	protein_coding	anoctamin 2, calcium activated chloride channel
ENSG00000160932.10	-1.50479	9.24298	7.77047e-47	2.8673e-44	132.7	124.95	170.71	374.05	395.83	414.31	LY6E	chr8	protein_coding	lymphocyte antigen 6 complex, locus E
ENSG00000186832.8	-1.28086	-0.0846828	2.48703e-07	9.32684e-06	0.22	0.26	0.43	0.61	0.73	0.82	KRT16	chr17	protein_coding	keratin 16, type I
ENSG00000187634.10	-1.17101	2.59478	2.87423e-18	3.23325e-16	1.39	1.06	1.73	3.35	3.06	2.76	SAMD11	chr1	protein_coding	sterile alpha motif domain containing 11
ENSG00000140678.16	-0.693963	1.20871	4.15947e-05	0.000923643	0.29	0.25	0.33	0.47	0.41	0.48	ITGAX	chr16	protein_coding	integrin, alpha X (complement component 3 receptor 4 subunit)
ENSG00000078018.19	-1.11723	3.65852	5.12728e-21	6.78594e-19	0.65	0.7	0.9	1.84	1.5	1.43	MAP2	chr2	protein_coding	microtubule-associated protein 2
ENSG00000142303.13	-0.587926	3.0634	2.12254e-06	6.55378e-05	1.67	1.25	1.51	2.05	2.13	2.32	ADAMTS10	chr19	protein_coding	ADAM metallopeptidase with thrombospondin type 1 motif, 10
ENSG00000166710.17	-1.38511	10.2716	2.57946e-40	7.27335e-38	238.03	251.8	344.92	786.19	702.31	640.65	B2M	chr15	protein_coding	beta-2-microglobulin
ENSG00000099308.10	-0.627035	2.57012	2.08988e-06	6.47301e-05	0.73	0.78	0.77	1.18	1.21	1.04	MAST3	chr19	protein_coding	microtubule associated serine/threonine kinase 3
ENSG00000168016.13	-1.20445	5.41206	7.94317e-29	1.49317e-26	2.2	2.04	2.91	5.58	5.19	5.29	TRANK1	chr3	protein_coding	tetratricopeptide repeat and ankyrin repeat containing 1
ENSG00000173821.19	-1.00225	8.71546	3.95574e-22	5.65708e-20	9.85	10.36	14.69	23.22	22.18	22.76	RNF213	chr17	protein_coding	ring finger protein 213
ENSG00000261298.1	-1.3733	-1.58614	0.0008945	0.0124468	0.08	0.11	0.07	0.2	0.21	0.26	RP11-309M7.1	chr2	lincRNA	--
ENSG00000140853.15	-1.58337	4.71277	1.95868e-45	6.57785e-43	1.49	1.7	2.39	5.51	5.25	5.55	NLRC5	chr16	protein_coding	NLR family, CARD domain containing 5
ENSG00000257354.2	1.10186	0.74101	9.00032e-09	4.22972e-07	0.24	0.24	0.27	0.1	0.11	0.13	RP11-631N16.2	chr12	lincRNA	--
ENSG00000027697.12	-0.596642	6.11786	1.44505e-08	6.61425e-07	24.96	23.46	26.77	42.28	37.11	31.74	IFNGR1	chr6	protein_coding	interferon gamma receptor 1
ENSG00000164749.11	-0.794796	0.372703	0.000187699	0.00340214	0.22	0.15	0.22	0.43	0.29	0.28	HNF4G	chr8	protein_coding	hepatocyte nuclear factor 4, gamma
ENSG00000119283.15	-0.892822	-0.637527	0.00202325	0.0238835	0.02	0.04	0.06	0.09	0.1	0.05	TRIM67	chr1	protein_coding	tripartite motif containing 67
ENSG00000236833.1	1.84747	-2.29453	0.00163117	0.0201296	0.09	0.13	0.25	0.04	0.03	0.05	AC024560.2	chr3	lincRNA	--
ENSG00000153822.13	-1.22105	-0.098801	8.77773e-07	2.95115e-05	0.15	0.04	0.14	0.39	0.23	0.12	KCNJ16	chr17	protein_coding	potassium channel, inwardly rectifying subfamily J, member 16
ENSG00000111704.10	-2.53708	-2.94821	0.00454226	0.0455736	0	0.01	0.01	0.03	0.03	0.01	NANOG	chr12	protein_coding	Nanog homeobox
ENSG00000261534.1	-1.48549	-2.05525	0.00418326	0.0429373	0.01	0.04	0.02	0.08	0.04	0.08	RP11-244O19.1	chr9	sense_overlapping	--
ENSG00000188290.10	-0.89741	4.78824	2.94193e-16	2.96065e-14	15.82	17.75	20.37	28.76	32.76	36.18	HES4	chr1	protein_coding	hes family bHLH transcription factor 4
ENSG00000089250.18	-1.73011	-1.43394	2.96391e-05	0.000689403	0	0.01	0.02	0.05	0.02	0.04	NOS1	chr12	protein_coding	nitric oxide synthase 1 (neuronal)
ENSG00000160678.11	-1.49451	-1.66847	0.000543864	0.00830212	0.11	0.13	0.14	0.53	0.25	0.3	S100A1	chr1	protein_coding	S100 calcium binding protein A1
ENSG00000162738.5	-0.870986	1.72793	1.11797e-08	5.19675e-07	0.41	0.42	0.42	0.73	0.84	0.67	VANGL2	chr1	protein_coding	VANGL planar cell polarity protein 2
ENSG00000064300.8	-1.45577	-0.472149	2.06505e-07	7.90299e-06	0.11	0.08	0.08	0.19	0.33	0.23	NGFR	chr17	protein_coding	nerve growth factor receptor
ENSG00000231925.11	-0.989744	7.68608	1.90406e-21	2.57514e-19	29.19	30.18	36.37	59.72	61.89	63.6	TAPBP	chr6	protein_coding	TAP binding protein (tapasin)
ENSG00000159261.10	-2.03817	-2.26373	0.000419778	0.00669875	0.05	0	0.02	0.15	0.06	0.09	CLDN14	chr21	protein_coding	claudin 14
ENSG00000105559.11	-2.6511	4.97014	2.19581e-117	5.96643e-114	1.87	1.98	4.25	16.33	16.36	16.83	PLEKHA4	chr19	protein_coding	pleckstrin homology domain containing, family A (phosphoinositide binding specific) member 4
ENSG00000106541.11	-0.811624	8.03048	4.60713e-15	4.27648e-13	100.29	65.25	105.03	186.41	156.71	122.05	AGR2	chr7	protein_coding	anterior gradient 2
ENSG00000265750.1	-0.586005	0.423441	0.00501614	0.049185	1.09	1.36	1.62	1.98	2	1.97	RP11-799B12.4	chr18	lincRNA	--
ENSG00000168306.12	-0.720746	4.36576	1.13357e-10	6.72939e-09	7.01	4.78	6.83	11.46	10.16	8.38	ACOX2	chr3	protein_coding	acyl-CoA oxidase 2, branched chain
ENSG00000100219.16	-0.595201	6.49519	1.28858e-08	5.95278e-07	35.9	28.27	38.33	56.86	50.82	43.69	XBP1	chr22	protein_coding	X-box binding protein 1
ENSG00000186470.13	-0.756843	4.51359	8.94214e-12	6.01963e-10	4.01	3.58	4.38	6.59	6.96	6.17	BTN3A2	chr6	protein_coding	butyrophilin, subfamily 3, member A2
ENSG00000140057.8	-0.634911	0.901868	0.000468022	0.00733973	0.38	0.19	0.38	0.4	0.56	0.48	AK7	chr14	protein_coding	adenylate kinase 7
ENSG00000226025.9	-2.68376	1.29382	3.26634e-44	1.04976e-41	0.24	0.1	0.39	1.39	1.83	1.32	LGALS17A	chr19	transcribed_unprocessed_pseudogene	--
ENSG00000125848.9	-1.11408	2.86572	5.71742e-18	6.30583e-16	0.86	0.77	1.04	2.52	1.81	1.32	FLRT3	chr20	protein_coding	fibronectin leucine rich transmembrane protein 3
ENSG00000170379.19	-1.158	-0.470986	2.48297e-05	0.000590873	0.06	0.04	0.08	0.14	0.13	0.14	TCAF2	chr7	protein_coding	TRPM8 channel-associated factor 2
ENSG00000169248.12	-3.80929	1.8493	1.8132e-86	1.59396e-83	0.22	0.2	0.3	3.82	3.34	2.63	CXCL11	chr4	protein_coding	chemokine (C-X-C motif) ligand 11
ENSG00000231607.8	1.31375	2.15452	5.27657e-20	6.62653e-18	1.48	1.27	1.15	0.65	0.54	0.35	DLEU2	chr13	antisense	deleted in lymphocytic leukemia 2 (non-protein coding)
ENSG00000089356.16	-3.25048	-1.07119	4.94984e-15	4.58037e-13	0.01	0.03	0.04	0.22	0.27	0.25	FXYD3	chr19	protein_coding	FXYD domain containing ion transport regulator 3
ENSG00000116285.12	-0.647017	6.89025	5.30801e-10	2.91103e-08	20.36	20.32	23.86	35.58	33.16	29.92	ERRFI1	chr1	protein_coding	ERBB receptor feedback inhibitor 1
ENSG00000241081.1	-0.771419	0.560147	0.000109986	0.00214862	3.24	2.31	2.57	4.94	4.68	3.93	RP11-488C13.1	chr14	processed_pseudogene	--
ENSG00000162896.5	-4.06178	-1.23408	8.98879e-17	9.26434e-15	0.01	0	0.01	0.23	0.14	0.09	PIGR	chr1	protein_coding	polymeric immunoglobulin receptor
ENSG00000140557.11	4.51308	-3.43282	0.00808871	0.0706704	0.02	0.01	0	0	0	0	ST8SIA2	chr15	protein_coding	ST8 alpha-N-acetyl-neuraminide alpha-2,8-sialyltransferase 2
ENSG00000239002.3	-2.302	-2.75541	0.00288816	0.0320075	0.17	0	0.09	0.56	0.31	0.46	SCARNA10	chr12	snoRNA	small Cajal body-specific RNA 10
ENSG00000228084.1	-1.44039	-1.4708	0.000483885	0.00756029	0.34	0.12	0.26	0.56	0.89	0.46	RP5-884G6.2	chr1	antisense	--
ENSG00000126218.11	-2.22584	-2.54602	0.00107834	0.0145183	0.04	0.02	0.02	0.12	0.07	0.17	F10	chr13	protein_coding	coagulation factor X
ENSG00000198758.10	-0.908938	2.6648	5.14113e-12	3.56527e-10	2.25	1.1	2.11	4.16	3.03	2.82	EPS8L3	chr1	protein_coding	EPS8-like 3
ENSG00000165474.5	-0.917092	0.652124	3.03422e-06	9.07804e-05	0.37	0.36	0.53	0.84	0.72	0.75	GJB2	chr13	protein_coding	gap junction protein, beta 2, 26kDa
ENSG00000165443.11	-0.703127	0.387996	0.000859947	0.0120303	0.24	0.17	0.29	0.52	0.39	0.22	PHYHIPL	chr10	protein_coding	phytanoyl-CoA 2-hydroxylase interacting protein-like
ENSG00000169896.16	-0.732509	1.17568	1.79887e-05	0.000445824	0.36	0.33	0.32	0.49	0.59	0.57	ITGAM	chr16	protein_coding	integrin, alpha M (complement component 3 receptor 3 subunit)
ENSG00000007952.17	-1.70514	-0.974897	5.93952e-07	2.07876e-05	0.13	0.02	0.09	0.46	0.12	0.2	NOX1	chrX	protein_coding	NADPH oxidase 1
ENSG00000142611.16	-1.53704	-0.607049	2.17569e-07	8.25244e-06	0.03	0.02	0.05	0.1	0.09	0.1	PRDM16	chr1	protein_coding	PR domain containing 16
ENSG00000157851.16	0.601045	2.07559	2.29263e-05	0.000550839	0.93	0.86	0.94	0.55	0.62	0.59	DPYSL5	chr2	protein_coding	dihydropyrimidinase-like 5
ENSG00000076356.6	-1.16429	1.35612	3.75629e-12	2.64792e-10	0.15	0.12	0.12	0.27	0.33	0.26	PLXNA2	chr1	protein_coding	plexin A2
ENSG00000272279.1	-2.38239	-2.7112	0.00169827	0.0208287	0.1	0	0.05	0.29	0.37	0.19	RP11-157J24.2	chr6	lincRNA	--
ENSG00000197813.5	1.16583	-1.64563	0.00437502	0.0442671	0.53	0.57	0.79	0.23	0.49	0.09	CTC-301O7.4	chr19	lincRNA	--
ENSG00000138670.16	-1.26896	-1.50794	0.00232153	0.0268116	0.02	0.01	0.03	0.06	0.05	0.02	RASGEF1B	chr4	protein_coding	RasGEF domain family, member 1B
ENSG00000248099.3	-1.63247	-1.34723	3.70449e-05	0.000837253	0.15	0.21	0.16	0.41	0.68	0.51	INSL3	chr19	protein_coding	insulin-like 3 (Leydig cell)
ENSG00000180448.10	-0.747737	1.24722	8.20275e-06	0.000219295	0.27	0.37	0.32	0.47	0.52	0.56	HMHA1	chr19	protein_coding	histocompatibility (minor) HA-1
ENSG00000134207.14	1.37322	-1.16877	9.27053e-05	0.00185466	0.11	0.13	0.09	0.05	0.02	0.06	SYT6	chr1	protein_coding	synaptotagmin VI
ENSG00000115758.12	0.649279	7.99966	3.29744e-10	1.86687e-08	107.54	109.93	90.12	65.04	62.31	63.8	ODC1	chr2	protein_coding	ornithine decarboxylase 1
ENSG00000169876.13	-4.75845	-3.29595	0.002065	0.0242138	0	0	0	0.01	0.01	0.01	MUC17	chr7	protein_coding	mucin 17, cell surface associated
ENSG00000147689.16	-0.718919	3.08336	7.02626e-09	3.3927e-07	1.07	1.05	1.13	1.86	1.79	1.56	FAM83A	chr8	protein_coding	family with sequence similarity 83, member A
ENSG00000012171.17	-1.02862	3.8887	6.12797e-19	7.35578e-17	2.93	2.34	3.26	5.69	5.43	5.82	SEMA3B	chr3	protein_coding	sema domain, immunoglobulin domain (Ig), short basic domain, secreted, (semaphorin) 3B
ENSG00000159167.11	-0.588042	4.08527	2.13908e-07	8.12389e-06	2.98	3.09	3.41	5.08	4.4	4.44	STC1	chr8	protein_coding	stanniocalcin 1
ENSG00000169403.11	-0.720728	-0.321626	0.00466969	0.0465602	0.09	0.14	0.12	0.21	0.15	0.2	PTAFR	chr1	protein_coding	platelet-activating factor receptor
ENSG00000176040.13	-1.76744	-2.00062	0.000587832	0.00884856	0.03	0.02	0.04	0.1	0.06	0.16	TMPRSS7	chr3	protein_coding	transmembrane protease, serine 7
ENSG00000153291.15	1.36928	-1.52502	0.000974739	0.0134011	0.08	0.16	0.17	0.08	0.02	0.06	SLC25A27	chr6	protein_coding	solute carrier family 25, member 27
ENSG00000227471.8	-1.39176	3.94393	4.76013e-33	1.05389e-30	6.63	3.8	4.73	11.5	19.41	7.99	AKR1B15	chr7	protein_coding	aldo-keto reductase family 1, member B15
ENSG00000139410.14	-0.829989	5.24397	1.4094e-14	1.25748e-12	17.06	15.13	18.28	28.82	28.65	29.98	SDSL	chr12	protein_coding	serine dehydratase-like
ENSG00000126561.16	-1.25912	1.92858	3.71495e-17	3.93745e-15	0.4	0.45	0.49	1.05	1.02	1.07	STAT5A	chr17	protein_coding	signal transducer and activator of transcription 5A
ENSG00000082497.11	1.18444	-0.505558	2.11534e-05	0.000512361	0.16	0.19	0.15	0.05	0.09	0.08	SERTAD4	chr1	protein_coding	SERTA domain containing 4
ENSG00000183889.12	2.26817	-1.32444	7.40345e-09	3.54618e-07	0.05	0.03	0.99	0.08	0.06	0.06	NPIPA5	chr16	protein_coding	nuclear pore complex interacting protein family, member A5
ENSG00000139572.3	-2.285	-2.2962	0.000150134	0.00282757	0.03	0.01	0.03	0.04	0.11	0.19	GPR84	chr12	protein_coding	G protein-coupled receptor 84
ENSG00000162595.4	-1.92646	-2.71124	0.00794518	0.0700719	0.03	0.01	0.01	0.04	0.13	0.05	DIRAS3	chr1	protein_coding	DIRAS family, GTP-binding RAS-like 3
ENSG00000072858.10	-1.46517	0.616499	8.58856e-13	6.58214e-11	0.15	0.1	0.2	0.41	0.39	0.4	SIDT1	chr3	protein_coding	SID1 transmembrane family, member 1
ENSG00000197061.4	0.698	-0.431247	0.00792648	0.0700516	2.41	1.3	2.02	1.09	1.22	1.11	HIST1H4C	chr6	protein_coding	histone cluster 1, H4c
ENSG00000172724.11	-5.50176	-2.89773	1.80304e-05	0.000446487	0	0	0	0.1	0.27	0.2	CCL19	chr9	protein_coding	chemokine (C-C motif) ligand 19
ENSG00000143494.15	-0.619773	0.774685	0.00107263	0.0144805	0.17	0.15	0.24	0.33	0.31	0.22	VASH2	chr1	protein_coding	vasohibin 2
ENSG00000186198.3	-1.45109	3.09647	6.25701e-30	1.23037e-27	4.6	2.67	6.81	14.57	12.76	10.22	SLC51B	chr15	protein_coding	solute carrier family 51, beta subunit
ENSG00000164796.17	1.45738	-1.68831	0.00101831	0.0138852	0.01	0.04	0.03	0.01	0.01	0.01	CSMD3	chr8	protein_coding	CUB and Sushi multiple domains 3
ENSG00000264112.1	0.96863	2.80694	5.0916e-14	4.36054e-12	1.47	1.54	1.61	0.72	0.78	0.8	RP11-159D12.2	chr17	lincRNA	--
ENSG00000186496.10	-0.864148	-0.537076	0.0018451	0.0222192	0.08	0.08	0.15	0.2	0.22	0.13	ZNF396	chr18	protein_coding	zinc finger protein 396
ENSG00000036448.9	-0.607905	1.96171	2.80476e-05	0.000658535	0.71	0.51	0.55	1.03	0.74	0.85	MYOM2	chr8	protein_coding	myomesin 2
ENSG00000172780.16	-0.753748	3.83989	6.91219e-11	4.22492e-09	2.18	1.94	2.48	3.38	3.46	3.99	RAB43	chr3	protein_coding	RAB43, member RAS oncogene family
ENSG00000142920.16	-0.753713	0.559885	0.000164527	0.0030443	0.33	0.53	0.39	0.63	0.63	0.8	AZIN2	chr1	protein_coding	antizyme inhibitor 2
ENSG00000275688.4	-2.89119	-2.75566	0.000466963	0.00733038	0	0.03	0.03	0.26	0.13	0.08	CCL15-CCL14	chr17	protein_coding	CCL15-CCL14 readthrough (NMD candidate)
ENSG00000139547.7	-2.33	-0.850575	2.84079e-11	1.82598e-09	0.08	0.08	0.04	0.24	0.31	0.42	RDH16	chr12	protein_coding	retinol dehydrogenase 16 (all-trans)
ENSG00000173432.10	-2.63134	2.36365	1.46044e-65	8.39445e-63	1.22	1.9	2.22	9.32	9.09	13.82	SAA1	chr11	protein_coding	serum amyloid A1
ENSG00000162878.12	-1.06001	7.18089	3.96536e-24	6.338e-22	34.77	30.46	44.16	71.09	74.12	77.05	PKDCC	chr2	protein_coding	protein kinase domain containing, cytoplasmic
ENSG00000169169.14	-0.773499	3.19135	2.91144e-10	1.65752e-08	2.19	2.05	2.44	3.56	3.96	3.62	CPT1C	chr19	protein_coding	carnitine palmitoyltransferase 1C
ENSG00000244468.1	-2.43577	-1.01567	7.1338e-11	4.35147e-09	0.4	0.15	0.15	0.96	1.24	1.56	RP11-206M11.7	chr3	antisense	--
ENSG00000114698.14	-0.595168	1.08531	0.000696274	0.0101765	0.44	0.4	0.46	0.88	0.55	0.51	PLSCR4	chr3	protein_coding	phospholipid scramblase 4
ENSG00000105289.14	-1.23172	2.69544	1.6367e-20	2.11772e-18	1.15	0.72	1.25	3.02	2.16	1.98	TJP3	chr19	protein_coding	tight junction protein 3
ENSG00000221867.8	0.802119	0.808468	1.96665e-05	0.000481024	1.12	1.57	0.82	0.87	0.5	0.61	MAGEA3	chrX	protein_coding	melanoma antigen family A3
ENSG00000136156.12	-0.65304	6.97614	3.54659e-10	2.00008e-08	9.02	8.98	10.12	16.69	13.99	12.51	ITM2B	chr13	protein_coding	integral membrane protein 2B
ENSG00000131400.7	-0.862227	-0.105307	0.000370823	0.00604666	0.3	0.4	0.46	0.56	0.61	0.88	NAPSA	chr19	protein_coding	napsin A aspartic peptidase
ENSG00000155465.18	-0.800328	5.52356	7.29677e-14	6.19582e-12	13.16	9.49	13.49	22	20.95	18.53	SLC7A7	chr14	protein_coding	solute carrier family 7 (amino acid transporter light chain, y+L system), member 7
ENSG00000131401.11	-3.58107	0.813949	1.23972e-49	5.21886e-47	0.19	0.03	0.22	1.5	1.99	1.66	NAPSB	chr19	transcribed_unprocessed_pseudogene	napsin B aspartic peptidase, pseudogene
ENSG00000124635.8	-0.613192	2.14942	1.41155e-05	0.000359062	3.34	3.04	4.23	4.72	5.29	5.76	HIST1H2BJ	chr6	protein_coding	histone cluster 1, H2bj
ENSG00000244414.6	-1.01669	0.259448	3.52763e-06	0.000103675	0.43	0.47	0.82	1.23	1.3	0.88	CFHR1	chr1	protein_coding	complement factor H-related 1
ENSG00000197535.14	0.663542	3.9628	6.41519e-09	3.11778e-07	1.46	1.8	1.26	1.16	0.84	0.79	MYO5A	chr15	protein_coding	myosin VA (heavy chain 12, myoxin)
ENSG00000116717.11	-0.765596	5.25117	1.1619e-12	8.79192e-11	16.69	19.72	18.44	32.8	29.62	28.52	GADD45A	chr1	protein_coding	growth arrest and DNA-damage-inducible, alpha
ENSG00000261338.2	0.685854	-0.327366	0.00731264	0.0659926	0.42	0.43	0.46	0.3	0.25	0.25	RP11-378A13.1	chr2	sense_overlapping	--
ENSG00000183486.12	-2.40898	5.53722	1.01172e-102	1.43996e-99	3.58	3.46	7.03	24.65	24.81	23.34	MX2	chr21	protein_coding	MX dynamin-like GTPase 2
ENSG00000114302.15	0.776664	4.25764	4.76815e-12	3.32203e-10	3.71	3.93	3.21	2.28	1.83	2.06	PRKAR2A	chr3	protein_coding	protein kinase, cAMP-dependent, regulatory, type II, alpha
ENSG00000167244.17	-0.775306	-0.407997	0.00328944	0.0355067	0.07	0.09	0.06	0.11	0.12	0.12	IGF2	chr11	protein_coding	insulin-like growth factor 2
ENSG00000204632.11	-1.8589	-1.82469	0.000217338	0.00386207	0.03	0	0.14	0.22	0.13	0.29	HLA-G	chr6	protein_coding	major histocompatibility complex, class I, G
ENSG00000271976.1	0.596408	1.25095	0.000343897	0.00567887	1.11	0.96	1.1	0.82	0.62	0.61	RP11-884K10.7	chr3	antisense	--
ENSG00000234394.8	-2.81089	-2.80116	0.000830142	0.0117259	0.01	0	0	0.02	0.01	0.05	RP11-561O23.5	chr9	lincRNA	--
ENSG00000007216.14	-2.99216	-3.1703	0.00671615	0.0617468	0	0	0.01	0.04	0.02	0.04	SLC13A2	chr17	protein_coding	solute carrier family 13 (sodium-dependent dicarboxylate transporter), member 2
ENSG00000164621.5	-1.7458	-2.14127	0.00151039	0.018984	0.02	0.06	0.05	0.19	0.15	0.07	SMAD5-AS1	chr5	antisense	SMAD5 antisense RNA 1
ENSG00000273156.1	2.35119	-2.54508	0.00107834	0.0145183	0.08	0.45	0.34	0.12	0.04	0	RP11-127B20.2	chr4	lincRNA	--
ENSG00000269906.1	0.887992	0.366208	2.29004e-05	0.00055066	2.14	2.5	2.37	1.38	1.22	1.1	RP11-248J18.2	chr14	sense_intronic	--
ENSG00000129675.15	-1.89496	-1.80153	6.27749e-05	0.00132039	0.01	0	0.03	0.05	0.05	0.06	ARHGEF6	chrX	protein_coding	Rac/Cdc42 guanine nucleotide exchange factor (GEF) 6
ENSG00000198695.2	1.11358	7.16465	2.0656e-26	3.52793e-24	186.56	475.28	429.14	177.64	149.41	163.66	MT-ND6	chrM	protein_coding	mitochondrially encoded NADH dehydrogenase 6
ENSG00000132274.15	-2.50762	5.43302	1.10736e-109	1.83877e-106	3.08	3.12	6.37	27.6	22.75	19.47	TRIM22	chr11	protein_coding	tripartite motif containing 22
ENSG00000185101.12	-1.42904	-0.949282	2.14257e-05	0.000518536	0.09	0.07	0.12	0.24	0.3	0.21	ANO9	chr11	protein_coding	anoctamin 9
ENSG00000280739.2	-1.60491	-1.7788	0.000454265	0.00717248	0.02	0.03	0.02	0.08	0.06	0.06	EIF1B-AS1	chr3	processed_transcript	EIF1B antisense RNA 1
ENSG00000273734.1	-0.668012	0.973298	0.000208642	0.00372082	1.28	1.19	0.89	1.6	1.9	1.72	LLfos-48D6.2	chr19	protein_coding	--
ENSG00000110002.15	-0.891447	1.09623	3.70094e-07	1.33435e-05	0.19	0.21	0.29	0.44	0.49	0.32	VWA5A	chr11	protein_coding	von Willebrand factor A domain containing 5A
ENSG00000186115.12	-2.89108	-2.75571	0.000466963	0.00733038	0	0.01	0.01	0.08	0.07	0.03	CYP4F2	chr19	protein_coding	cytochrome P450, family 4, subfamily F, polypeptide 2
ENSG00000180616.8	-1.98857	-0.0512097	8.866e-15	8.05459e-13	0.04	0.05	0.05	0.18	0.16	0.19	SSTR2	chr17	protein_coding	somatostatin receptor 2
ENSG00000139269.2	-1.08576	-0.825612	0.000557125	0.00848028	0.1	0.13	0.15	0.26	0.27	0.27	INHBE	chr12	protein_coding	inhibin, beta E
ENSG00000184060.10	0.682992	2.0286	2.02656e-06	6.29783e-05	1.69	1.69	1.53	1	0.92	1.06	ADAP2	chr17	protein_coding	ArfGAP with dual PH domains 2
ENSG00000146859.6	-1.44585	4.2123	1.32081e-36	3.26261e-34	4.18	4.09	6.18	12.72	13.01	12.64	TMEM140	chr7	protein_coding	transmembrane protein 140
ENSG00000164850.14	-1.13913	-1.58552	0.00828513	0.0718037	0.05	0.02	0.09	0.16	0.1	0.09	GPER1	chr7	protein_coding	G protein-coupled estrogen receptor 1
ENSG00000226287.7	0.66549	0.631737	0.000678342	0.00995823	0.87	0.71	0.9	0.43	0.47	0.62	TMEM191A	chr22	processed_transcript	transmembrane protein 191A (pseudogene)
ENSG00000185267.9	-1.1274	-0.8374	0.000365259	0.00597222	0.24	0.13	0.25	0.5	0.48	0.34	CDNF	chr10	protein_coding	cerebral dopamine neurotrophic factor
ENSG00000111801.15	-1.55182	3.30631	2.5631e-35	6.08004e-33	1.28	1.45	2.11	4.88	4.6	4.37	BTN3A3	chr6	protein_coding	butyrophilin, subfamily 3, member A3
ENSG00000090554.12	-1.22345	1.09857	7.05057e-12	4.81129e-10	0.75	0.65	0.78	1.82	1.62	1.52	FLT3LG	chr19	protein_coding	fms-related tyrosine kinase 3 ligand
ENSG00000161091.12	-0.738671	6.00616	2.72286e-12	1.96105e-10	15.85	17.2	16.8	24.21	26.89	29.81	MFSD12	chr19	protein_coding	major facilitator superfamily domain containing 12
ENSG00000129990.14	-0.732544	1.4539	4.97023e-06	0.000141212	0.43	0.39	0.39	0.59	0.63	0.74	SYT5	chr19	protein_coding	synaptotagmin V
ENSG00000258777.1	-0.773295	-0.407288	0.00434835	0.0441443	0.93	0.5	0.87	1.01	1.52	1.28	HIF1A-AS1	chr14	lincRNA	HIF1A antisense RNA 1
ENSG00000148408.12	-1.48541	-1.01499	1.33003e-05	0.000341524	0.03	0.03	0.01	0.08	0.03	0.07	CACNA1B	chr9	protein_coding	calcium channel, voltage-dependent, N type, alpha 1B subunit
ENSG00000278233.1	-5.93053	-2.62613	3.24492e-07	1.19003e-05	0	0	0	0.69	0	3.15	RNA5-8S5	chr21	rRNA	RNA, 5.8S ribosomal 5
ENSG00000139714.12	-0.852781	-0.518411	0.00201865	0.0238643	0.08	0.17	0.1	0.15	0.22	0.25	MORN3	chr12	protein_coding	MORN repeat containing 3
ENSG00000137959.15	-1.52298	5.00048	3.1644e-43	9.75058e-41	2.17	2.13	3.87	8.65	7.76	6.53	IFI44L	chr1	protein_coding	interferon-induced protein 44-like
ENSG00000166145.14	-1.60227	-0.690878	1.89254e-07	7.3083e-06	0.14	0.05	0.06	0.3	0.24	0.24	SPINT1	chr15	protein_coding	serine peptidase inhibitor, Kunitz type 1
ENSG00000169562.9	-1.12165	-0.164025	9.24301e-06	0.000244698	0.27	0.09	0.39	0.99	0.41	0.2	GJB1	chrX	protein_coding	gap junction protein, beta 1, 32kDa
ENSG00000277476.1	1.08367	1.34699	6.06901e-11	3.77124e-09	1.08	1.38	1.16	0.56	0.57	0.54	RP11-147L13.13	chr17	lincRNA	--
ENSG00000204257.14	-0.627124	1.66828	4.49775e-05	0.000987028	2.82	1.66	1.87	3.24	3.48	2.84	HLA-DMA	chr6	protein_coding	major histocompatibility complex, class II, DM alpha
ENSG00000083720.12	1.1583	0.00296701	8.0827e-07	2.73905e-05	0.34	0.31	0.35	0.19	0.09	0.16	OXCT1	chr5	protein_coding	3-oxoacid CoA transferase 1
ENSG00000108828.15	0.663371	7.58375	1.51358e-10	8.85311e-09	81.88	83.69	73.51	45.21	49.51	52.21	VAT1	chr17	protein_coding	vesicle amine transport 1
ENSG00000139192.11	-1.86984	3.88502	3.97687e-54	1.85726e-51	3.13	3.12	4.23	12.86	13	11.51	TAPBPL	chr12	protein_coding	TAP binding protein-like
ENSG00000255198.4	0.886239	2.79995	5.64831e-12	3.87207e-10	16.3	16.41	14.8	7.19	8.52	9.29	SNHG9	chr16	lincRNA	small nucleolar RNA host gene 9
ENSG00000125730.16	-1.14617	7.84093	4.34292e-28	7.867e-26	23.47	26.39	29.1	56.79	57.58	55.97	C3	chr19	protein_coding	complement component 3
ENSG00000266401.1	-0.763991	0.987036	2.10797e-05	0.000511405	0.95	0.95	0.95	1.49	1.6	1.62	RP11-874J12.4	chr18	antisense	--
ENSG00000164211.12	-1.27235	3.00168	2.54724e-23	3.92445e-21	0.67	0.76	1.02	2.35	1.9	1.51	STARD4	chr5	protein_coding	StAR-related lipid transfer (START) domain containing 4
ENSG00000111859.16	-0.682981	5.97057	1.0269e-10	6.13862e-09	5.91	5.49	6.9	10.18	9.55	8.95	NEDD9	chr6	protein_coding	neural precursor cell expressed, developmentally down-regulated 9
ENSG00000224846.2	-1.52321	-0.936735	6.02599e-06	0.000167857	0.46	0.52	0.68	0.95	2.19	1.52	RP1-90J20.8	chr6	antisense	--
ENSG00000105639.18	-0.613425	1.15285	0.000346011	0.00570746	0.28	0.24	0.34	0.41	0.48	0.4	JAK3	chr19	protein_coding	Janus kinase 3
ENSG00000203446.2	-4.61241	-3.363	0.00408448	0.0421259	0	0	0	0.06	0.03	0.04	AC004988.1	chr7	antisense	--
ENSG00000158966.13	0.624996	0.359726	0.00275449	0.0307772	0.29	0.33	0.2	0.16	0.17	0.19	CACHD1	chr1	protein_coding	cache domain containing 1
ENSG00000272941.1	-1.0704	1.76924	2.52431e-12	1.82244e-10	2.21	1.53	1.73	3.99	3.77	3.48	RP11-134L10.1	chr7	antisense	--
ENSG00000269994.1	-0.801468	-0.576323	0.00452221	0.0454639	0.21	0.25	0.18	0.5	0.24	0.37	RP11-276H19.2	chr9	lincRNA	--
ENSG00000099834.18	-2.52813	-2.36384	0.000134251	0.00255419	0	0.01	0.02	0.07	0.1	0.01	CDHR5	chr11	protein_coding	cadherin-related family member 5
ENSG00000166143.9	-2.63174	0.784078	9.88687e-34	2.2387e-31	0.44	0.4	0.68	3.75	3.57	1.95	PPP1R14D	chr15	protein_coding	protein phosphatase 1, regulatory (inhibitor) subunit 14D
ENSG00000155158.20	-0.61685	1.89524	2.82298e-05	0.000661773	0.27	0.21	0.28	0.5	0.33	0.31	TTC39B	chr9	protein_coding	tetratricopeptide repeat domain 39B
ENSG00000278771.1	-1.02369	2.70832	5.51334e-15	5.05486e-13	20.09	10.38	10.99	23.13	24.01	34.85	Metazoa_SRP	chr14	misc_RNA	--
ENSG00000234690.6	-1.13315	-0.873452	0.0004192	0.00669309	0.05	0.09	0.18	0.23	0.23	0.21	AC073283.4	chr2	lincRNA	--
ENSG00000233098.8	-2.91034	-2.11218	1.77129e-06	5.57285e-05	0	0	0.01	0.04	0.04	0.03	CCDC144NL-AS1	chr17	antisense	CCDC144NL antisense RNA 1
ENSG00000106069.20	-1.36656	-1.20226	0.000182673	0.00332922	0.04	0.07	0.03	0.21	0.12	0.05	CHN2	chr7	protein_coding	chimerin 2
ENSG00000068079.7	-1.21082	8.57605	2.94801e-31	6.16176e-29	158.1	150.16	229.27	393.33	409.55	409.87	IFI35	chr17	protein_coding	interferon-induced protein 35
ENSG00000115616.2	0.628314	1.95308	1.52598e-05	0.000384247	0.84	0.95	0.72	0.68	0.47	0.44	SLC9A2	chr2	protein_coding	solute carrier family 9, subfamily A (NHE2, cation proton antiporter 2), member 2
ENSG00000143365.16	-2.03522	-1.39918	1.17871e-06	3.87573e-05	0.04	0.03	0.04	0.23	0.15	0.08	RORC	chr1	protein_coding	RAR-related orphan receptor C
ENSG00000144837.8	-2.99439	1.20472	9.58349e-49	3.87082e-46	0.23	0.15	0.37	2.6	1.68	1.6	PLA1A	chr3	protein_coding	phospholipase A1 member A
ENSG00000225339.3	0.585627	0.257656	0.00739431	0.0665087	0.36	0.34	0.29	0.25	0.18	0.21	RP11-513I15.6	chr6	processed_transcript	--
ENSG00000119865.8	0.995771	-0.563966	0.000404852	0.00650222	0.18	0.28	0.23	0.16	0.1	0.08	CNRIP1	chr2	protein_coding	cannabinoid receptor interacting protein 1
ENSG00000111912.18	-1.03811	6.74987	4.87242e-23	7.35514e-21	9.35	9.25	11.82	25.6	19.6	15.93	NCOA7	chr6	protein_coding	nuclear receptor coactivator 7
ENSG00000077522.12	-2.77264	-1.97471	8.04745e-07	2.7302e-05	0	0.02	0.01	0.08	0.03	0.08	ACTN2	chr1	protein_coding	actinin, alpha 2
ENSG00000124201.14	-0.762822	6.94461	2.59669e-13	2.11478e-11	9.12	9.29	10.97	16.53	16.41	15.68	ZNFX1	chr20	protein_coding	zinc finger, NFX1-type containing 1
ENSG00000170498.8	-1.89857	-1.68996	2.53814e-05	0.00060113	0.08	0.11	0.24	0.67	0.47	0.46	KISS1	chr1	protein_coding	KiSS-1 metastasis-suppressor
ENSG00000104368.17	-0.910141	1.34442	4.151e-08	1.76737e-06	0.57	0.54	0.71	0.82	1.37	1.12	PLAT	chr8	protein_coding	plasminogen activator, tissue
ENSG00000129221.14	-2.22552	-2.54625	0.00107834	0.0145183	0	0.01	0.02	0.05	0.05	0.04	AIPL1	chr17	protein_coding	aryl hydrocarbon receptor interacting protein-like 1
ENSG00000279095.1	0.870781	3.64357	1.14979e-13	9.51971e-12	8.06	8.73	6.35	3.94	4.02	4.36	AC092066.1	chr19	TEC	--
ENSG00000010030.13	-2.5822	1.96476	2.49182e-55	1.20126e-52	0.39	0.45	0.49	2.7	2.52	2.61	ETV7	chr6	protein_coding	ets variant 7
ENSG00000234745.9	-2.38093	8.83419	6.83227e-108	1.07479e-104	65.43	81.2	130.17	472.4	460.76	471.85	HLA-B	chr6	protein_coding	major histocompatibility complex, class I, B
ENSG00000131203.12	-3.29215	2.42938	8.18666e-91	7.6466e-88	0.31	0.35	0.57	3.76	4.07	3.92	IDO1	chr8	protein_coding	indoleamine 2,3-dioxygenase 1
ENSG00000249007.1	-1.92636	-2.71129	0.00794518	0.0700719	0.06	0.03	0.03	0.08	0.28	0.08	RP11-510N19.5	chr1	sense_intronic	--
ENSG00000174460.3	-2.45918	-2.66834	0.000993155	0.0135918	0.01	0.02	0	0.11	0.08	0.03	ZCCHC12	chrX	protein_coding	zinc finger, CCHC domain containing 12
ENSG00000103227.18	-0.832825	2.95816	4.30986e-11	2.72341e-09	2.03	2.03	2.09	3.42	3.75	3.5	LMF1	chr16	protein_coding	lipase maturation factor 1
ENSG00000184371.13	-0.67139	6.07514	1.91352e-10	1.11271e-08	9.32	10.53	11.1	15.1	16.31	16.59	CSF1	chr1	protein_coding	colony stimulating factor 1 (macrophage)
ENSG00000178750.2	-3.42642	-2.94823	0.000580729	0.00876636	0.02	0	0	0.07	0.15	0.11	STX19	chr3	protein_coding	syntaxin 19
ENSG00000143382.13	-1.00597	2.32894	3.367e-13	2.71257e-11	0.69	0.65	0.78	1.41	1.15	1.58	ADAMTSL4	chr1	protein_coding	ADAMTS-like 4
ENSG00000196189.12	-1.92659	-2.7111	0.00794518	0.0700719	0.01	0.01	0.02	0.04	0.05	0.04	SEMA4A	chr1	protein_coding	sema domain, immunoglobulin domain (Ig), transmembrane domain (TM) and short cytoplasmic domain, (semaphorin) 4A
ENSG00000258793.1	-0.99976	-0.398929	0.000162985	0.00302199	0.82	0.48	0.54	1.79	0.89	0.93	RP11-404P21.3	chr14	antisense	--
ENSG00000136327.6	-0.684802	1.8818	3.21283e-06	9.55504e-05	1.99	2.27	2.16	3.29	3.04	3.72	NKX2-8	chr14	protein_coding	NK2 homeobox 8
ENSG00000185955.4	-0.820812	-0.711092	0.00589809	0.0559822	0.22	0.32	0.62	0.53	0.58	0.88	C7orf61	chr7	protein_coding	chromosome 7 open reading frame 61
ENSG00000150756.13	1.21205	2.72776	2.73677e-20	3.48082e-18	4.67	4.42	4.82	2.24	1.85	1.76	FAM173B	chr5	protein_coding	family with sequence similarity 173, member B
ENSG00000185664.14	-0.611897	0.53775	0.00222418	0.0257769	0.26	0.38	0.49	0.59	0.63	0.46	PMEL	chr12	protein_coding	premelanosome protein
ENSG00000213492.2	-1.2483	1.05111	5.12892e-12	3.56507e-10	0.51	0.6	0.97	2.03	1.66	1.14	NT5C3AP1	chr4	transcribed_processed_pseudogene	5'-nucleotidase, cytosolic IIIA pseudogene 1
ENSG00000266978.1	2.75556	-2.8962	0.00259068	0.0292531	0.27	0.03	0.15	0	0.03	0.03	CTD-2369P2.5	chr19	antisense	--
ENSG00000197588.9	1.3687	0.184055	1.4568e-09	7.65244e-08	0.86	0.93	0.59	0.33	0.29	0.28	KLKP1	chr19	transcribed_unprocessed_pseudogene	kallikrein pseudogene 1
ENSG00000149418.10	-1.11806	-0.767703	0.000278122	0.00472855	0.05	0.1	0.12	0.18	0.19	0.21	ST14	chr11	protein_coding	suppression of tumorigenicity 14 (colon carcinoma)
ENSG00000120211.4	-0.901417	3.8741	6.408e-15	5.85714e-13	6.06	3.41	5.7	11.16	8.85	7.71	INSL4	chr9	protein_coding	insulin-like 4 (placenta)
ENSG00000004777.18	0.658532	1.08108	0.000158986	0.00296625	0.56	0.53	0.59	0.34	0.31	0.38	ARHGAP33	chr19	protein_coding	Rho GTPase activating protein 33
ENSG00000186204.14	-1.62028	1.84929	2.11567e-25	3.51307e-23	0.87	0.49	1.05	2.66	2.26	2.3	CYP4F12	chr19	protein_coding	cytochrome P450, family 4, subfamily F, polypeptide 12
ENSG00000105641.3	-1.39538	-1.12727	8.24673e-05	0.00167336	0.03	0.07	0.08	0.1	0.21	0.15	SLC5A5	chr19	protein_coding	solute carrier family 5 (sodium/iodide cotransporter), member 5
ENSG00000143867.6	0.688847	2.88305	5.4592e-08	2.28529e-06	4.51	4.79	4.31	2.59	2.5	3.13	OSR1	chr2	protein_coding	odd-skipped related transciption factor 1
ENSG00000273247.5	1.12237	-0.920131	0.000360478	0.0059005	0.07	0.06	0.1	0.05	0.03	0.04	RP11-83A24.2	chr4	antisense	--
ENSG00000278192.1	1.09732	-0.823609	0.000421892	0.00672164	0.31	0.45	0.29	0.11	0.26	0.1	RP5-1056H1.2	chr20	lincRNA	--
ENSG00000225492.6	-2.94945	-0.520538	8.70119e-19	1.02638e-16	0.05	0.05	0.08	0.43	0.57	0.36	GBP1P1	chr1	transcribed_unprocessed_pseudogene	guanylate binding protein 1, interferon-inducible pseudogene 1
ENSG00000175147.11	-0.880122	-0.224811	0.00051323	0.00794248	0.05	0.08	0.1	0.1	0.13	0.19	TMEM51-AS1	chr1	antisense	TMEM51 antisense RNA 1
ENSG00000248503.2	1.12751	-1.66709	0.00607578	0.0572868	0.14	0.18	0.12	0.04	0.09	0.05	RP5-1000K24.2	chrX	transcribed_processed_pseudogene	--
ENSG00000101605.12	-1.40558	-1.56661	0.000622246	0.00928987	0.01	0.05	0.02	0.06	0.07	0.06	MYOM1	chr18	protein_coding	myomesin 1
ENSG00000116661.9	-0.659534	2.75189	3.26559e-07	1.19614e-05	3.92	2.77	2.96	4.94	4.68	5.23	FBXO2	chr1	protein_coding	F-box protein 2
ENSG00000168679.17	-1.02308	6.11974	4.71278e-22	6.70764e-20	16.41	14.63	19.25	39.63	33.46	26.91	SLC16A4	chr1	protein_coding	solute carrier family 16, member 4
ENSG00000249790.2	-2.1312	-1.89774	2.51009e-05	0.000595428	0.05	0	0.05	0.16	0.1	0.17	RP11-20D14.6	chr12	lincRNA	--
ENSG00000118849.9	-1.52008	3.80795	3.82799e-37	9.77904e-35	3.78	2.22	4.02	12.72	8.95	6.5	RARRES1	chr3	protein_coding	retinoic acid receptor responder (tazarotene induced) 1
ENSG00000008118.9	-1.97768	-2.14098	0.000415242	0.006637	0.03	0.01	0.03	0.08	0.1	0.12	CAMK1G	chr1	protein_coding	calcium/calmodulin-dependent protein kinase IG
ENSG00000057704.10	-0.853977	0.467101	3.39414e-05	0.000777375	0.19	0.09	0.17	0.32	0.28	0.21	TMCC3	chr12	protein_coding	transmembrane and coiled-coil domain family 3
ENSG00000205363.5	1.05285	-1.58376	0.00828513	0.0718037	0.04	0.05	0.09	0.01	0.03	0.04	C15orf59	chr15	protein_coding	chromosome 15 open reading frame 59
ENSG00000244255.5	-2.46856	6.51151	2.05207e-111	4.71802e-108	5.29	5.48	9.19	39.83	36.6	31.48	XXbac-BPG116M5.17	chr6	protein_coding	--
ENSG00000171223.5	-0.695622	6.59059	2.95662e-11	1.89636e-09	38.27	37.94	41.45	58.22	61.52	65.8	JUNB	chr19	protein_coding	jun B proto-oncogene
ENSG00000163354.14	-1.57679	-2.00109	0.00188141	0.0225928	0.03	0.05	0.04	0.1	0.15	0.1	DCST2	chr1	protein_coding	DC-STAMP domain containing 2
ENSG00000274925.1	0.976723	-0.412893	0.000298836	0.0050486	0.27	0.24	0.36	0.14	0.15	0.14	CTD-2547G23.4	chr16	lincRNA	--
ENSG00000131781.12	-1.05942	-0.766712	0.000422113	0.00672164	0.18	0.03	0.11	0.28	0.1	0.26	FMO5	chr1	protein_coding	flavin containing monooxygenase 5
ENSG00000090776.5	-0.727312	4.40213	6.86119e-11	4.20234e-09	4.18	4.62	5.15	7.53	7.63	7.35	EFNB1	chrX	protein_coding	ephrin-B1
ENSG00000105675.8	-2.21551	-1.58594	6.4985e-07	2.24808e-05	0.02	0.02	0.03	0.13	0.03	0.18	ATP4A	chr19	protein_coding	ATPase, H+/K+ exchanging, alpha polypeptide
ENSG00000130589.16	-0.836817	7.35095	8.73768e-16	8.53466e-14	10.17	11.26	14.01	19.73	20.84	21.1	HELZ2	chr20	protein_coding	helicase with zinc finger 2, transcriptional coactivator
ENSG00000143507.17	-0.605437	1.90486	3.9194e-05	0.000877506	1	1.1	1.08	1.78	1.6	1.35	DUSP10	chr1	protein_coding	dual specificity phosphatase 10
ENSG00000223652.2	-4.6123	-3.36306	0.00408448	0.0421259	0	0	0	0.07	0.13	0.1	AC106786.1	chr5	antisense	--
ENSG00000243649.8	-2.31453	0.27316	1.4346e-21	1.94903e-19	0.08	0.13	0.18	0.87	0.6	0.43	CFB	chr6	protein_coding	complement factor B
ENSG00000234928.1	-5.22845	-3.05516	0.000136549	0.00259461	0	0	0	0.32	0.08	0	AP000344.3	chr22	lincRNA	--
ENSG00000130234.10	-3.75247	-2.20155	1.17312e-07	4.67513e-06	0	0.02	0	0.05	0.07	0.12	ACE2	chrX	protein_coding	angiotensin I converting enzyme 2
ENSG00000174502.18	-1.16791	0.173353	2.23155e-07	8.44287e-06	0.14	0.09	0.17	0.35	0.29	0.23	SLC26A9	chr1	protein_coding	solute carrier family 26 (anion exchanger), member 9
ENSG00000250508.1	-4.03021	-2.58612	3.95166e-06	0.000114894	0.01	0	0	0.08	0.09	0.02	RP11-757G1.6	chr11	lincRNA	--
ENSG00000172771.11	-1.45769	-0.435186	1.38363e-07	5.45585e-06	0.22	0.11	0.16	0.5	0.41	0.4	EFCAB12	chr3	protein_coding	EF-hand calcium binding domain 12
ENSG00000105479.15	-1.32344	-1.34659	0.000647049	0.00957408	0.06	0.04	0.07	0.16	0.13	0.13	CCDC114	chr19	protein_coding	coiled-coil domain containing 114
ENSG00000272524.1	1.05974	-0.882232	0.000641076	0.00952342	2.74	0.89	2.22	1.03	0.61	1.07	RP11-254F7.4	chr2	lincRNA	--
ENSG00000113555.5	-1.72304	-2.02782	0.00090334	0.0125388	0.01	0.01	0.02	0.03	0.05	0.05	PCDH12	chr5	protein_coding	protocadherin 12
ENSG00000132530.16	-2.0645	5.74409	1.23652e-78	8.59494e-76	3.95	3.95	8.69	26.09	23.34	18.39	XAF1	chr17	protein_coding	XIAP associated factor 1
ENSG00000175084.11	-1.92932	-2.17073	0.000658609	0.00973067	0.04	0.01	0.04	0.13	0.1	0.1	DES	chr2	protein_coding	desmin
ENSG00000169583.12	-1.57215	-0.0709635	4.66927e-10	2.58444e-08	0.38	0.42	0.47	1.04	0.97	1.7	CLIC3	chr9	protein_coding	chloride intracellular channel 3
ENSG00000244731.7	-1.72309	-1.08431	1.41572e-06	4.54995e-05	0.01	0.05	0.05	0.15	0.08	0.1	C4A	chr6	protein_coding	complement component 4A (Rodgers blood group)
ENSG00000228412.6	-0.848033	-0.861469	0.00611722	0.0575685	0.19	0.22	0.12	0.37	0.25	0.32	RP4-625H18.2	chr6	lincRNA	--
ENSG00000226145.7	-4.89085	-3.23199	0.00104527	0.0141624	0	0	0	0.06	0.08	0.01	KRT16P6	chr17	transcribed_unprocessed_pseudogene	keratin 16 pseudogene 6
ENSG00000120217.13	-1.38876	2.09908	2.33104e-21	3.1384e-19	0.52	0.56	0.76	1.81	1.43	1.47	CD274	chr9	protein_coding	CD274 molecule
ENSG00000187288.10	-0.900452	3.15796	3.65908e-13	2.92423e-11	5.81	2.59	4.68	10.21	8.25	5.46	CIDEC	chr3	protein_coding	cell death-inducing DFFA-like effector c
ENSG00000165874.12	-0.652457	0.051736	0.00467178	0.0465605	0.22	0.15	0.29	0.44	0.27	0.32	FAM35BP	chr10	transcribed_unprocessed_pseudogene	family with sequence similarity 35, member B, pseudogene
ENSG00000169213.6	0.688824	3.59094	4.63186e-09	2.277e-07	1.05	1.32	0.99	0.7	0.68	0.65	RAB3B	chr1	protein_coding	RAB3B, member RAS oncogene family
ENSG00000182393.2	-3.18044	3.25004	5.01541e-111	9.99371e-108	1.9	2.2	2.25	17.19	18.03	20.86	IFNL1	chr19	protein_coding	interferon, lambda 1
ENSG00000261420.1	2.65807	-2.94697	0.00454226	0.0455736	0.15	0.03	0.05	0	0	0.03	RP1-168L15.5	chr6	antisense	--
ENSG00000006210.6	-2.78192	0.17093	2.02955e-26	3.48627e-24	0.03	0.03	0.08	0.27	0.28	0.32	CX3CL1	chr16	protein_coding	chemokine (C-X3-C motif) ligand 1
ENSG00000155760.2	-0.819126	3.87548	1.24376e-12	9.37833e-11	2.45	2.48	3.05	5.16	4.48	4.1	FZD7	chr2	protein_coding	frizzled class receptor 7
ENSG00000102271.13	0.682586	2.41121	3.94715e-07	1.41799e-05	1	1.24	1.01	0.83	0.76	0.39	KLHL4	chrX	protein_coding	kelch-like family member 4
ENSG00000239617.1	-1.05282	-0.700741	0.000420214	0.00670212	1.46	0.41	0.79	1.87	1.67	1.86	RP11-302B13.1	chr12	processed_pseudogene	--
ENSG00000265864.1	1.0229	-1.43207	0.00688606	0.0629796	5.3	4.84	5.81	1.35	3.25	2.93	AC092117.2	chr16	miRNA	--
ENSG00000136002.16	-0.836589	0.125661	0.000216245	0.0038475	0.09	0.1	0.07	0.14	0.12	0.18	ARHGEF4	chr2	protein_coding	Rho guanine nucleotide exchange factor (GEF) 4
ENSG00000139899.10	-0.777713	0.839139	3.03329e-05	0.000703351	0.49	0.4	0.55	0.84	0.76	0.81	CBLN3	chr14	protein_coding	cerebellin 3 precursor
ENSG00000155093.17	-0.675408	1.30802	4.57775e-05	0.00100154	0.34	0.39	0.39	0.72	0.54	0.49	PTPRN2	chr7	protein_coding	protein tyrosine phosphatase, receptor type, N polypeptide 2
ENSG00000179673.4	1.01509	-0.946751	0.00168636	0.0207082	0.68	0.57	0.41	0.27	0.35	0.19	RPRML	chr17	protein_coding	reprimo-like
ENSG00000205609.12	0.611825	0.339498	0.00357032	0.0378684	0.59	0.45	0.35	0.39	0.2	0.3	EIF3CL	chr16	protein_coding	eukaryotic translation initiation factor 3, subunit C-like
ENSG00000227268.3	-0.664493	-0.0491927	0.00570641	0.0545614	0.15	0.18	0.15	0.21	0.26	0.27	KLLN	chr10	protein_coding	killin, p53-regulated DNA replication inhibitor
ENSG00000173262.11	-1.58252	-2.1119	0.00317312	0.0344752	0	0.02	0.04	0.07	0.06	0.03	SLC2A14	chr12	protein_coding	solute carrier family 2 (facilitated glucose transporter), member 14
ENSG00000182752.9	-0.685587	5.02712	2.5207e-10	1.44586e-08	1.77	2.42	2.44	3.92	3.37	3.12	PAPPA	chr9	protein_coding	pregnancy-associated plasma protein A, pappalysin 1
ENSG00000274737.1	-2.38278	-2.71128	0.00169827	0.0208287	0	0.1	0.05	0.41	0.29	0.2	RP5-1057I20.6	chr12	sense_intronic	--
ENSG00000140488.14	17.0805	7.91031	0	0	270.09	294.94	172.27	0	0	0	CELF6	chr15	protein_coding	CUGBP, Elav-like family member 6
ENSG00000124507.10	-1.17295	-1.56597	0.00607497	0.0572868	0.04	0.02	0.05	0.1	0.09	0.06	PACSIN1	chr6	protein_coding	protein kinase C and casein kinase substrate in neurons 1
ENSG00000241106.6	-2.50469	-0.963345	1.81361e-11	1.18098e-09	0.08	0.12	0.08	0.71	0.54	0.35	HLA-DOB	chr6	protein_coding	major histocompatibility complex, class II, DO beta
ENSG00000242732.4	-0.621289	1.82515	2.8345e-05	0.000662914	0.57	0.63	0.75	0.95	0.99	0.98	RGAG4	chrX	protein_coding	retrotransposon gag domain containing 4
ENSG00000142484.6	-0.908951	1.5228	1.51076e-08	6.89391e-07	3.81	1.07	3.16	6.64	4.98	3.15	TM4SF5	chr17	protein_coding	transmembrane 4 L six family member 5
ENSG00000137673.8	-0.892297	6.61993	1.81415e-17	1.93654e-15	61.1	51.28	65.7	114.25	112	96.56	MMP7	chr11	protein_coding	matrix metallopeptidase 7
ENSG00000136059.14	-1.66135	-0.949251	8.14301e-07	2.75636e-05	0.07	0.06	0.07	0.18	0.2	0.26	VILL	chr3	protein_coding	villin-like
ENSG00000179979.8	0.699066	0.734739	0.000217517	0.00386296	0.37	0.47	0.47	0.3	0.31	0.18	CRIPAK	chr4	protein_coding	cysteine-rich PAK1 inhibitor
ENSG00000163898.9	-0.64161	4.04178	1.72938e-08	7.84361e-07	3.03	2.73	3.51	5	4.78	4.33	LIPH	chr3	protein_coding	lipase, member H
ENSG00000168743.12	-0.778209	2.61154	3.34995e-09	1.67436e-07	0.78	0.87	1.09	1.62	1.65	1.31	NPNT	chr4	protein_coding	nephronectin
ENSG00000002933.7	-3.11341	-3.11156	0.00366111	0.0385136	0	0	0.02	0.14	0.05	0.02	TMEM176A	chr7	protein_coding	transmembrane protein 176A
ENSG00000196188.10	-2.59871	-1.89789	1.02039e-06	3.40461e-05	0.02	0	0.05	0.2	0.09	0.17	CTSE	chr1	protein_coding	cathepsin E
ENSG00000237276.8	-1.50264	1.10125	1.3419e-16	1.36888e-14	0.35	0.56	0.77	1.72	1.33	1.61	ANO7P1	chr1	transcribed_unprocessed_pseudogene	anoctamin 7 pseudogene 1
ENSG00000258947.6	0.609732	0.401468	0.00330418	0.0356143	0.42	0.48	0.46	0.3	0.28	0.29	TUBB3	chr16	protein_coding	tubulin, beta 3 class III
ENSG00000117226.11	-1.31699	3.57974	9.26868e-28	1.66887e-25	1.97	1.9	2.59	6.95	4.81	4	GBP3	chr1	protein_coding	guanylate binding protein 3
ENSG00000162777.16	-1.21292	1.24284	1.53184e-12	1.13494e-10	0.53	0.63	0.69	1.49	1.4	1.27	DENND2D	chr1	protein_coding	DENN/MADD domain containing 2D
ENSG00000106789.12	-0.766759	1.8957	2.10331e-07	7.99818e-06	0.61	0.34	0.43	1	0.76	0.54	CORO2A	chr9	protein_coding	coronin, actin binding protein, 2A
ENSG00000260804.3	1.11528	2.8277	6.58e-18	7.2305e-16	3.08	3.14	2.73	1.52	1.34	1.18	PKI55	chr2	lincRNA	--
ENSG00000159166.13	-1.1526	-0.120164	3.82841e-06	0.000111964	0.21	0.09	0.23	0.5	0.38	0.29	LAD1	chr1	protein_coding	ladinin 1
ENSG00000105327.15	-0.736634	4.02845	1.04174e-10	6.21487e-09	5.28	5.32	6.36	8.79	9.65	9.1	BBC3	chr19	protein_coding	BCL2 binding component 3
ENSG00000153162.8	-0.710845	2.62957	6.13362e-08	2.55687e-06	1.53	1.46	1.88	2.81	2.74	2.23	BMP6	chr6	protein_coding	bone morphogenetic protein 6
ENSG00000137767.13	-0.713418	6.71214	8.65755e-12	5.84121e-10	34.29	33.15	38.85	55.63	57.34	56.89	SQRDL	chr15	protein_coding	sulfide quinone reductase-like (yeast)
ENSG00000137561.4	1.25294	-1.09556	0.00023931	0.00419515	0.26	0.28	0.19	0.11	0.05	0.13	TTPA	chr8	protein_coding	tocopherol (alpha) transfer protein
ENSG00000273038.2	1.30888	2.78902	1.51752e-23	2.37471e-21	4.73	5.1	4.05	1.84	1.85	1.77	RP11-479G22.8	chr10	lincRNA	--
ENSG00000277067.4	-3.41134	-2.43466	7.69107e-06	0.000207659	0.01	0.01	0	0.01	0.28	0	CH507-254M2.1	chr21	lincRNA	--
ENSG00000157368.10	-2.48359	-1.17144	5.20772e-10	2.86655e-08	0.04	0.04	0.09	0.28	0.17	0.48	IL34	chr16	protein_coding	interleukin 34
ENSG00000167588.12	-1.4562	-0.179912	2.01708e-08	9.02525e-07	0.18	0.06	0.17	0.67	0.29	0.16	GPD1	chr12	protein_coding	glycerol-3-phosphate dehydrogenase 1 (soluble)
ENSG00000151687.14	0.839569	-0.0953188	0.000498186	0.00774326	0.25	0.28	0.22	0.17	0.11	0.13	ANKAR	chr2	protein_coding	ankyrin and armadillo repeat containing
ENSG00000087116.13	-1.38925	-1.18606	0.00013034	0.00249566	0.03	0.01	0.04	0.1	0.06	0.06	ADAMTS2	chr5	protein_coding	ADAM metallopeptidase with thrombospondin type 1 motif, 2
ENSG00000143153.12	-0.59153	7.74054	1.06228e-08	4.95326e-07	59.46	57.58	66.59	110.12	87.91	72.7	ATP1B1	chr1	protein_coding	ATPase, Na+/K+ transporting, beta 1 polypeptide
ENSG00000247317.3	-1.07004	0.531493	1.13778e-07	4.54639e-06	0.21	0.31	0.25	0.57	0.54	0.49	RP11-273G15.2	chr8	lincRNA	--
ENSG00000178033.5	-1.47294	-1.38121	0.000210259	0.00374743	0.01	0.02	0.02	0.05	0.05	0.05	FAM26E	chr6	protein_coding	family with sequence similarity 26, member E
ENSG00000260822.1	1.03849	1.57835	4.06741e-11	2.57566e-09	0.82	0.77	0.74	0.4	0.42	0.29	GS1-358P8.4	chrX	sense_overlapping	--
ENSG00000132744.7	-1.73062	1.85275	2.43893e-28	4.49982e-26	1.31	0.68	1.68	4.83	3.43	3.63	ACY3	chr11	protein_coding	aminoacylase 3
ENSG00000131773.13	1.31997	0.704495	1.32908e-11	8.73781e-10	1.07	0.91	0.83	0.48	0.31	0.3	KHDRBS3	chr8	protein_coding	KH domain containing, RNA binding, signal transduction associated 3
ENSG00000160255.16	-1.02631	0.119412	6.61745e-06	0.000182631	0.23	0.12	0.21	0.44	0.39	0.29	ITGB2	chr21	protein_coding	integrin, beta 2 (complement component 3 receptor 3 and 4 subunit)
ENSG00000101846.6	-0.857047	3.36555	1.37578e-12	1.02801e-10	1.04	1	1.22	2.1	2.03	1.62	STS	chrX	protein_coding	steroid sulfatase (microsomal), isozyme S
ENSG00000271192.1	1.46664	-1.84793	0.00277869	0.0310012	0.55	0.98	0.21	0.1	0.19	0.32	RP4-555D20.3	chr3	lincRNA	--
ENSG00000126709.14	-1.28002	10.8931	6.89688e-35	1.5857e-32	1061.85	1076.16	1596.54	2865.78	2961.87	3010.34	IFI6	chr1	protein_coding	interferon, alpha-inducible protein 6
ENSG00000158373.8	-0.713462	3.74737	8.5604e-10	4.64359e-08	12.4	9.67	11.77	21.31	17.24	15.69	HIST1H2BD	chr6	protein_coding	histone cluster 1, H2bd
ENSG00000100985.7	-1.04486	-0.241977	3.21444e-05	0.000740758	0.17	0.3	0.17	0.43	0.48	0.38	MMP9	chr20	protein_coding	matrix metallopeptidase 9
ENSG00000211448.11	-1.10835	-0.0561837	5.27868e-06	0.000148844	0.03	0.07	0.14	0.25	0.13	0.14	DIO2	chr14	protein_coding	deiodinase, iodothyronine, type II
ENSG00000092010.14	-0.924752	8.28136	4.52271e-19	5.47284e-17	159.6	156.18	196.14	320.07	314.76	312.74	PSME1	chr14	protein_coding	proteasome (prosome, macropain) activator subunit 1 (PA28 alpha)
ENSG00000196542.8	-1.19297	-0.272093	4.8676e-06	0.000138692	0.2	0.01	0.22	0.57	0.19	0.19	SPTSSB	chr3	protein_coding	serine palmitoyltransferase, small subunit B
ENSG00000272579.1	0.93132	-0.0597769	8.08311e-05	0.00164575	1.36	1.87	1.8	1.41	0.73	0.44	RP11-101E13.5	chr1	antisense	--
ENSG00000238000.1	-1.04482	-0.813798	0.000835106	0.0117738	0.31	0.52	0.51	0.84	0.85	1.02	RP11-274E7.2	chr5	processed_pseudogene	--
ENSG00000115419.12	0.645972	5.49645	1.42827e-09	7.52902e-08	6.61	7.99	6.05	5.69	3.95	3.27	GLS	chr2	protein_coding	glutaminase
ENSG00000156050.8	-0.699598	0.830841	0.000145341	0.00273903	0.32	0.32	0.3	0.56	0.53	0.39	FAM161B	chr14	protein_coding	family with sequence similarity 161, member B
ENSG00000084636.17	-0.739681	2.79244	8.22509e-09	3.89948e-07	0.75	0.83	0.85	1.13	1.41	1.42	COL16A1	chr1	protein_coding	collagen, type XVI, alpha 1
ENSG00000249196.6	-0.776604	1.14677	7.09652e-06	0.00019406	2.25	2.61	3.74	5.25	4.06	5.04	RP11-669N7.2	chr12	antisense	--
ENSG00000265096.1	-1.31295	-1.41612	0.00103683	0.0140735	0.19	0.19	0.23	0.55	0.44	0.5	C1QTNF1-AS1	chr17	antisense	C1QTNF1 antisense RNA 1
ENSG00000239620.1	-1.08296	-0.987341	0.000983229	0.0134806	0.37	0.27	0.75	0.88	0.76	1.22	RP11-88I21.1	chr3	processed_pseudogene	--
ENSG00000251141.5	2.05295	-2.71007	0.00794518	0.0700719	0.11	0.06	0.07	0	0.05	0	RP11-53O19.1	chr5	antisense	--
ENSG00000159399.9	-0.620036	2.67794	1.76745e-06	5.57194e-05	0.75	0.88	0.82	1.35	1.21	1.11	HK2	chr2	protein_coding	hexokinase 2
ENSG00000235863.3	-1.08133	-0.346967	5.23113e-05	0.00112565	0.26	0.22	0.32	0.53	0.46	0.66	B3GALT4	chr6	protein_coding	UDP-Gal:betaGlcNAc beta 1,3-galactosyltransferase, polypeptide 4
ENSG00000119508.17	-0.807445	-0.338666	0.00220596	0.0255954	0.08	0.07	0.09	0.09	0.19	0.13	NR4A3	chr9	protein_coding	nuclear receptor subfamily 4, group A, member 3
ENSG00000137198.9	-2.02499	2.31612	7.11559e-43	2.14826e-40	1.04	0.91	1.78	5.23	5.48	4.05	GMPR	chr6	protein_coding	guanosine monophosphate reductase
ENSG00000163823.3	-2.73598	-1.47133	1.2481e-09	6.60256e-08	0.06	0	0.02	0.21	0.19	0.15	CCR1	chr3	protein_coding	chemokine (C-C motif) receptor 1
ENSG00000140511.11	-0.93938	3.46579	5.36334e-15	4.93246e-13	3.02	3.13	4.2	5.62	6.99	6.69	HAPLN3	chr15	protein_coding	hyaluronan and proteoglycan link protein 3
ENSG00000182853.11	-1.10514	-1.15624	0.00176751	0.0214839	0.45	0.27	0.18	0.79	0.54	0.57	VMO1	chr17	protein_coding	vitelline membrane outer layer 1 homolog (chicken)
ENSG00000135744.7	-1.31006	0.206921	7.8452e-09	3.74062e-07	0.29	0.28	0.22	0.84	0.72	0.38	AGT	chr1	protein_coding	angiotensinogen (serpin peptidase inhibitor, clade A, member 8)
ENSG00000185418.15	0.63666	2.35664	2.5428e-06	7.74738e-05	1.65	1.63	1.65	1.12	0.97	1.01	TARSL2	chr15	protein_coding	threonyl-tRNA synthetase-like 2
ENSG00000197969.11	0.592139	2.57614	6.56409e-06	0.000181325	0.37	0.41	0.42	0.33	0.27	0.17	VPS13A	chr9	protein_coding	vacuolar protein sorting 13 homolog A (S. cerevisiae)
ENSG00000123240.16	-0.70694	5.98731	2.22365e-11	1.4417e-09	10.36	11.43	12.83	19.57	18.7	16.86	OPTN	chr10	protein_coding	optineurin
ENSG00000135373.12	-0.950827	2.50152	1.5712e-12	1.15955e-10	0.76	0.97	1.08	2.16	1.84	1.31	EHF	chr11	protein_coding	ets homologous factor
ENSG00000185745.9	-1.22011	9.47504	7.74294e-32	1.65306e-29	80.59	74.97	114.19	237.36	207.4	169.83	IFIT1	chr10	protein_coding	interferon-induced protein with tetratricopeptide repeats 1
ENSG00000240065.7	-1.65419	7.15832	1.07892e-54	5.11869e-52	60.76	61.88	95.04	210.29	225.59	231.42	PSMB9	chr6	protein_coding	proteasome (prosome, macropain) subunit, beta type, 9
ENSG00000156453.13	-0.88802	1.89831	2.06439e-09	1.06752e-07	0.44	0.5	0.44	0.9	0.76	0.84	PCDH1	chr5	protein_coding	protocadherin 1
ENSG00000271605.5	-0.833604	2.19417	2.81043e-09	1.41654e-07	2.11	2.15	1.91	3.82	3.3	3.61	MILR1	chr17	protein_coding	mast cell immunoglobulin-like receptor 1
ENSG00000260948.1	1.33745	-1.54417	0.00137457	0.0176707	0.22	0.17	0.21	0.09	0.03	0.11	RP11-552M11.8	chr1	sense_overlapping	--
ENSG00000279496.1	-1.00785	0.106695	1.04531e-05	0.000273823	0.5	0.54	0.66	0.94	1.38	1.01	CTC-251I16.1	chr5	TEC	--
ENSG00000248871.1	-0.673302	1.79032	7.42662e-06	0.000201593	1.47	1.4	1.33	2.04	2.19	2.29	TNFSF12-TNFSF13	chr17	protein_coding	TNFSF12-TNFSF13 readthrough
ENSG00000163075.12	-1.63222	-1.66831	0.000185364	0.00337414	0.04	0.02	0.04	0.08	0.08	0.14	CFAP221	chr2	protein_coding	cilia and flagella associated protein 221
ENSG00000163202.4	0.93019	-0.440636	0.000611018	0.00914966	1.93	1.36	0.97	0.69	0.66	0.83	LCE3D	chr1	protein_coding	late cornified envelope 3D
ENSG00000099998.17	-0.938986	3.51853	4.06251e-15	3.79451e-13	2.74	3.04	3.33	5.02	5.81	6.15	GGT5	chr22	protein_coding	gamma-glutamyltransferase 5
ENSG00000276085.1	-2.98925	-0.578359	2.37042e-18	2.68369e-16	0.04	0.24	0.22	1.85	0.81	1.26	CCL3L3	chr17	protein_coding	chemokine (C-C motif) ligand 3-like 3
ENSG00000171446.6	-2.11711	-2.39814	0.000674912	0.00991762	0.02	0.02	0.05	0.08	0.17	0.13	KRT27	chr17	protein_coding	keratin 27, type I
ENSG00000160182.2	-1.43213	1.52093	3.45982e-18	3.87305e-16	3.35	1.27	3.39	8.14	6.35	6.58	TFF1	chr21	protein_coding	trefoil factor 1
ENSG00000125148.6	-0.794734	8.13184	1.58287e-14	1.39972e-12	198.64	198.01	206.08	311.39	335.44	370.77	MT2A	chr16	protein_coding	metallothionein 2A
ENSG00000279805.1	-1.84076	-2.08316	0.000627245	0.00934583	0.04	0.01	0.06	0.15	0.11	0.16	CTA-212A2.1	chr22	TEC	--
ENSG00000261553.5	-1.28474	-1.43432	0.000850263	0.0119312	0.03	0.07	0.03	0.13	0.08	0.09	RP11-29G8.3	chr13	processed_transcript	--
ENSG00000120057.4	-1.95537	-1.28119	3.27258e-07	1.19723e-05	0.14	0.09	0	0.42	0.25	0.21	SFRP5	chr10	protein_coding	secreted frizzled-related protein 5
ENSG00000168079.16	-0.631528	1.40833	0.000105749	0.00207262	0.55	0.29	0.5	0.74	0.63	0.65	SCARA5	chr8	protein_coding	scavenger receptor class A, member 5
ENSG00000162692.10	-2.3007	-0.539095	1.36953e-13	1.13077e-11	0.05	0.08	0.06	0.35	0.32	0.29	VCAM1	chr1	protein_coding	vascular cell adhesion molecule 1
ENSG00000166165.12	-0.646265	5.93067	9.70905e-10	5.20994e-08	25.96	25.71	29.3	37.47	42.84	43.05	CKB	chr14	protein_coding	creatine kinase, brain
ENSG00000186517.13	-3.11331	-3.11168	0.00366111	0.0385136	0.01	0	0	0.02	0.04	0.01	ARHGAP30	chr1	protein_coding	Rho GTPase activating protein 30
ENSG00000276026.1	0.767466	-0.614573	0.0085961	0.0737242	2.9	4.52	3.12	1.64	1.58	2.79	RP4-545L17.11	chr20	antisense	--
ENSG00000102313.8	-2.968	-2.71131	0.000261745	0.0045117	0	0.01	0	0.04	0.03	0.04	ITIH6	chrX	protein_coding	inter-alpha-trypsin inhibitor heavy chain family, member 6
ENSG00000169245.5	-3.45194	2.48966	2.28855e-98	2.7361e-95	0.47	0.53	1.3	8.62	8.76	7.07	CXCL10	chr4	protein_coding	chemokine (C-X-C motif) ligand 10
ENSG00000170099.5	0.618727	0.833184	0.000705185	0.0102666	2.03	0.72	1.24	1.14	0.98	0.43	SERPINA6	chr14	protein_coding	serpin peptidase inhibitor, clade A (alpha-1 antiproteinase, antitrypsin), member 6
ENSG00000253598.1	1.15631	-1.52479	0.00321508	0.0348299	0.17	0.11	0.19	0.1	0.04	0.06	SLC10A5	chr8	protein_coding	solute carrier family 10, member 5
ENSG00000272079.2	0.830198	-0.812366	0.00726737	0.0656236	0.63	0.7	0.18	0.31	0.26	0.26	LA16c-380H5.5	chr16	lincRNA	--
ENSG00000141837.18	-2.43485	-2.20122	5.40102e-05	0.00115804	0.01	0	0.01	0.02	0.03	0.03	CACNA1A	chr19	protein_coding	calcium channel, voltage-dependent, P/Q type, alpha 1A subunit
ENSG00000215246.5	-1.20633	-0.322592	3.89929e-06	0.000113926	0.14	0.14	0.09	0.32	0.24	0.28	RP11-43F13.3	chr5	antisense	--
ENSG00000111254.7	-1.4049	-1.56662	0.000622246	0.00928987	0.02	0.06	0.04	0.09	0.17	0.09	AKAP3	chr12	protein_coding	A kinase (PRKA) anchor protein 3
ENSG00000198286.9	-0.929755	0.22014	2.2221e-05	0.000536481	0.16	0.15	0.19	0.29	0.34	0.31	CARD11	chr7	protein_coding	caspase recruitment domain family, member 11
ENSG00000128218.7	-1.24234	-1.28043	0.000938243	0.0129589	0.36	0.4	0.23	0.82	0.62	0.87	VPREB3	chr22	protein_coding	pre-B lymphocyte 3
ENSG00000137965.10	-1.45911	6.27272	1.65915e-42	4.90995e-40	18.67	20.23	32.23	71.62	65.04	54.39	IFI44	chr1	protein_coding	interferon-induced protein 44
ENSG00000105290.11	-0.585174	6.03231	2.83515e-08	1.24252e-06	16.19	15.96	17.56	23.1	24.67	24.88	APLP1	chr19	protein_coding	amyloid beta (A4) precursor-like protein 1
ENSG00000273174.1	-2.38663	-2.23231	9.02127e-05	0.00180843	0.05	0.1	0.1	0.47	0.4	0.45	RP11-434H6.6	chr3	antisense	--
ENSG00000128311.13	-0.623709	5.74529	4.15732e-09	2.05726e-07	22.68	18.61	24.04	32.23	33.36	32.57	TST	chr22	protein_coding	thiosulfate sulfurtransferase (rhodanese)
ENSG00000018280.16	-1.90116	-1.58634	2.3688e-05	0.000566407	0.02	0.02	0.04	0.13	0.11	0.08	SLC11A1	chr2	protein_coding	solute carrier family 11 (proton-coupled divalent metal ion transporter), member 1
ENSG00000125844.15	-0.621372	7.93403	1.81361e-09	9.39461e-08	30.54	33.44	36.49	49.56	50.55	50.47	RRBP1	chr20	protein_coding	ribosome binding protein 1
ENSG00000102796.10	-0.791359	2.09555	3.40713e-08	1.47588e-06	1.19	0.71	1.34	1.56	1.89	2.02	DHRS12	chr13	protein_coding	dehydrogenase/reductase (SDR family) member 12
ENSG00000182197.10	-0.614216	6.18098	5.20145e-09	2.55281e-07	6.21	6.71	7.26	10.05	10.58	9.48	EXT1	chr8	protein_coding	exostosin glycosyltransferase 1
ENSG00000016402.12	-1.55145	-1.33035	7.09684e-05	0.00146187	0.03	0.04	0.04	0.11	0.14	0.08	IL20RA	chr6	protein_coding	interleukin 20 receptor, alpha
ENSG00000256124.5	-0.881353	0.0815462	0.000125295	0.00241298	0.12	0.26	0.2	0.35	0.38	0.3	LINC01152	chr17	lincRNA	long intergenic non-protein coding RNA 1152
ENSG00000221963.5	-1.1297	5.86645	3.53075e-26	5.96219e-24	3.07	3.03	4.41	8.19	7.49	6.79	APOL6	chr22	protein_coding	apolipoprotein L, 6
ENSG00000117834.12	-1.04204	-0.576422	0.000244756	0.00427308	0.08	0.11	0.16	0.29	0.22	0.21	SLC5A9	chr1	protein_coding	solute carrier family 5 (sodium/sugar cotransporter), member 9
ENSG00000277342.1	1.79397	-1.64596	5.45092e-05	0.00116691	0.68	1.18	0.43	0.35	0.14	0.14	RP11-843B15.4	chr12	sense_intronic	--
ENSG00000253339.1	-2.99267	-3.17026	0.00671615	0.0617468	0	0.05	0	0.09	0	0.38	RP11-434I12.3	chr8	lincRNA	--
ENSG00000187325.4	0.609323	3.72337	1.56007e-07	6.10328e-06	5.63	5.64	5.81	4.71	3.21	3.04	TAF9B	chrX	protein_coding	TAF9B RNA polymerase II, TATA box binding protein (TBP)-associated factor, 31kDa
ENSG00000168404.12	-0.790975	5.6771	1.11121e-13	9.25149e-12	13.98	13.6	15	24.17	24.19	23.47	MLKL	chr16	protein_coding	mixed lineage kinase domain-like
ENSG00000272338.2	0.653403	-0.109807	0.00689863	0.0630739	1.67	2.1	1.62	1.24	0.66	1.45	RP11-722E23.2	chr8	lincRNA	--
ENSG00000170369.3	-1.75644	-0.188649	2.21373e-11	1.43839e-09	0.66	0.36	0.42	1.55	2	1.22	CST2	chr20	protein_coding	cystatin SA
ENSG00000254143.1	-2.12598	-2.84863	0.00819476	0.0712429	0.05	0.1	0	0.4	0.14	0.19	RP11-470M17.2	chr8	lincRNA	--
ENSG00000130222.10	1.12798	-1.66661	0.00607578	0.0572868	0.33	0.22	0.24	0.1	0.12	0.13	GADD45G	chr9	protein_coding	growth arrest and DNA-damage-inducible, gamma
ENSG00000106686.16	-0.617009	1.28189	0.000206729	0.00369332	0.9	0.85	1.22	1.15	1.68	1.58	SPATA6L	chr9	protein_coding	spermatogenesis associated 6-like
ENSG00000279347.1	2.72554	-2.5841	0.000334872	0.00556055	0.17	0.07	0.12	0	0.02	0.03	RP11-85I17.2	chr8	TEC	--
ENSG00000214145.6	-0.808207	1.31161	1.364e-06	4.40743e-05	0.49	0.27	0.47	0.71	0.66	0.74	LINC00887	chr3	lincRNA	long intergenic non-protein coding RNA 887
ENSG00000241358.1	-4.44954	-3.43351	0.00808871	0.0706704	0	0	0	0.09	0.14	0	RP11-758I14.3	chr3	transcribed_processed_pseudogene	--
ENSG00000168961.16	-2.64118	5.41135	5.01283e-120	1.49828e-116	2.73	2.64	5.61	23.12	21.82	21.79	LGALS9	chr17	protein_coding	lectin, galactoside-binding, soluble, 9
ENSG00000000971.15	-1.55438	5.98152	2.79619e-47	1.08539e-44	6.86	5.56	8.9	26.09	20.89	14.4	CFH	chr1	protein_coding	complement factor H
ENSG00000250461.1	1.98644	-2.54486	0.00465381	0.0464588	0.07	0.25	0.42	0	0.14	0.03	RP11-631M6.2	chr5	processed_pseudogene	--
ENSG00000167720.12	-0.590199	2.98291	2.33358e-06	7.16103e-05	2.02	2.27	2.4	3.44	3.27	3.09	SRR	chr17	protein_coding	serine racemase
ENSG00000170477.12	0.708319	1.33718	1.61057e-05	0.000403844	1.16	0.89	1.44	0.67	0.76	0.65	KRT4	chr12	protein_coding	keratin 4, type II
ENSG00000137200.12	-0.632108	5.96972	2.15518e-09	1.11062e-07	11.51	11.05	12.9	17.74	18.34	17.49	CMTR1	chr6	protein_coding	cap methyltransferase 1
ENSG00000237424.1	0.643022	1.68515	2.58051e-05	0.000610679	1.59	1.57	1.32	0.87	0.74	1.18	FOXD2-AS1	chr1	antisense	FOXD2 antisense RNA 1 (head to head)
ENSG00000269469.1	-1.0984	1.08717	5.39257e-10	2.95199e-08	1.55	1.68	2.43	3.52	3.76	4.51	CTD-3148I10.9	chr19	protein_coding	--
ENSG00000122971.8	-0.636454	4.30092	1.32591e-08	6.09694e-07	7.03	6.57	7.83	10.77	10.4	11.28	ACADS	chr12	protein_coding	acyl-CoA dehydrogenase, C-2 to C-3 short chain
ENSG00000266835.5	-0.655046	0.413514	0.00171635	0.0210245	0.87	0.67	1.21	1.43	1.64	1.13	GAPLINC	chr18	lincRNA	gastric adenocarcinoma associated, positive CD44 regulator, long intergenic non-coding RNA
ENSG00000264772.5	-1.49718	8.30482	3.78517e-46	1.3004e-43	30.28	33.08	42.43	93.37	97.24	100.26	RP11-186B7.4	chr17	processed_transcript	--
ENSG00000100299.17	-0.632109	4.09856	2.40699e-08	1.06267e-06	5.92	6.53	6.56	9.6	8.79	10.3	ARSA	chr22	protein_coding	arylsulfatase A
ENSG00000223414.2	-0.604742	1.89462	3.53579e-05	0.000805497	0.99	0.87	0.73	1.53	1.07	1.27	LINC00473	chr6	lincRNA	long intergenic non-protein coding RNA 473
ENSG00000172602.9	-0.993166	4.16646	2.27092e-18	2.58081e-16	8.29	4.56	7.85	15.14	13.78	11.37	RND1	chr12	protein_coding	Rho family GTPase 1
ENSG00000197536.10	-1.20678	2.42294	2.18729e-18	2.49526e-16	0.4	0.33	0.65	1.09	0.98	1.03	C5orf56	chr5	protein_coding	chromosome 5 open reading frame 56
ENSG00000265683.1	1.3252	-1.19904	0.000182673	0.00332922	0.72	0.78	0.7	0.47	0.1	0.28	RP11-173M1.5	chr17	processed_pseudogene	--
ENSG00000272831.1	0.703049	2.94968	2.3268e-08	1.02878e-06	17.61	16.76	15.4	10.28	9.75	9.79	RP11-792A8.4	chr7	antisense	--
ENSG00000160190.13	-0.758131	2.79118	3.41598e-09	1.70451e-07	1.37	1.2	1.24	2.3	2.13	1.85	SLC37A1	chr21	protein_coding	solute carrier family 37 (glucose-6-phosphate transporter), member 1
ENSG00000163661.3	1.04622	0.855566	2.01702e-08	9.02525e-07	1.16	1.29	1.11	0.67	0.52	0.5	PTX3	chr3	protein_coding	pentraxin 3, long
ENSG00000103490.13	-0.721046	1.89163	1.01598e-06	3.39672e-05	2.73	2.34	3.03	4.13	3.84	5.02	PYCARD	chr16	protein_coding	PYD and CARD domain containing
ENSG00000188505.4	-1.11551	-1.05592	0.000984627	0.0134936	0.04	0.15	0.2	0.2	0.37	0.26	NCCRP1	chr19	protein_coding	non-specific cytotoxic cell receptor protein 1 homolog (zebrafish)
ENSG00000203618.5	1.02954	-1.23006	0.00366684	0.0385136	0.32	0.26	0.36	0.15	0.13	0.16	GP1BB	chr22	protein_coding	glycoprotein Ib (platelet), beta polypeptide
ENSG00000123700.4	-0.788668	1.56441	6.25168e-07	2.18036e-05	0.45	0.2	0.46	0.82	0.61	0.44	KCNJ2	chr17	protein_coding	potassium channel, inwardly rectifying subfamily J, member 2
ENSG00000151470.12	-0.908294	3.9549	2.72948e-15	2.57354e-13	1.45	1.39	1.93	3.12	3.25	2.38	C4orf33	chr4	protein_coding	chromosome 4 open reading frame 33
ENSG00000203668.1	0.608871	3.67105	1.77452e-07	6.88813e-06	2.14	2.15	2.01	1.66	1.39	1	CHML	chr1	protein_coding	choroideremia-like (Rab escort protein 2)
ENSG00000156509.13	0.685569	0.891488	0.000166894	0.00308111	0.73	0.71	0.81	0.4	0.55	0.4	FBXO43	chr8	protein_coding	F-box protein 43
ENSG00000172201.10	-1.10636	2.88585	9.01808e-18	9.73074e-16	1.83	1.47	2.46	4.35	4.06	3.71	ID4	chr6	protein_coding	inhibitor of DNA binding 4, dominant negative helix-loop-helix protein
ENSG00000236098.1	-1.87118	-1.11273	3.19201e-07	1.17351e-05	0.09	0.23	0.53	1.03	1.03	0.98	RP11-148B18.4	chr1	lincRNA	--
ENSG00000176928.5	-1.00847	-0.567253	0.000359306	0.00588778	0.06	0.08	0.07	0.12	0.19	0.11	GCNT4	chr5	protein_coding	glucosaminyl (N-acetyl) transferase 4, core 2
ENSG00000162772.16	-0.611086	3.58176	2.01665e-07	7.74752e-06	3.29	4	3.53	5.43	5.43	5.25	ATF3	chr1	protein_coding	activating transcription factor 3
ENSG00000273033.2	0.722824	0.790199	9.36835e-05	0.00187173	0.35	0.4	0.36	0.26	0.2	0.19	RP11-67L2.2	chr3	lincRNA	--
ENSG00000115267.5	-1.27317	5.90622	1.19703e-32	2.5926e-30	6.87	6.85	10.52	22.75	19.2	15.33	IFIH1	chr2	protein_coding	interferon induced with helicase C domain 1
ENSG00000104883.7	-0.852114	0.935184	3.23693e-06	9.61716e-05	0.84	0.97	0.9	1.51	1.67	1.59	PEX11G	chr19	protein_coding	peroxisomal biogenesis factor 11 gamma
ENSG00000117228.9	-1.82206	4.06745	3.97649e-53	1.80081e-50	2.06	2.16	2.84	9.93	8.19	6.28	GBP1	chr1	protein_coding	guanylate binding protein 1, interferon-inducible
ENSG00000214076.3	-0.750371	0.253281	0.000583602	0.00879641	0.27	0.25	0.14	0.29	0.48	0.31	CPSF1P1	chr22	processed_pseudogene	cleavage and polyadenylation specific factor 1, 160kDa pseudogene 1
ENSG00000013288.8	-0.761784	4.17327	1.53971e-11	1.00701e-09	2.27	2.66	2.62	4.2	4.24	4.04	MAN2B2	chr4	protein_coding	mannosidase, alpha, class 2B, member 2
ENSG00000224389.8	-3.54657	-0.827103	1.34102e-18	1.54815e-16	0.02	0	0.03	0.26	0.1	0.13	C4B	chr6	protein_coding	complement component 4B (Chido blood group)
ENSG00000127252.5	1.17068	-1.70961	0.00839052	0.0725239	0.26	0.3	0.4	0.2	0.1	0.12	HRASLS	chr3	protein_coding	HRAS-like suppressor
ENSG00000230438.6	-1.15183	-1.28004	0.0020574	0.0241762	0.22	0.08	0.16	0.44	0.28	0.3	SERPINB9P1	chr6	lincRNA	serpin peptidase inhibitor, clade B (ovalbumin), member 9, pseudogene 1
ENSG00000165269.12	-0.677973	-0.0769334	0.0051262	0.050071	0.2	0.13	0.19	0.26	0.34	0.21	AQP7	chr9	protein_coding	aquaporin 7
ENSG00000136449.13	-1.02493	-0.825398	0.0010913	0.0146335	0.03	0.07	0.11	0.16	0.13	0.12	MYCBPAP	chr17	protein_coding	MYCBP associated protein
ENSG00000233885.7	5.18873	-3.11083	0.000268792	0.00460924	0.03	0.08	0.03	0	0	0	YEATS2-AS1	chr3	antisense	YEATS2 antisense RNA 1
ENSG00000110628.13	-0.633324	4.12354	2.23248e-08	9.91481e-07	6.65	5.44	7.6	10.41	9.58	9.8	SLC22A18	chr11	protein_coding	solute carrier family 22, member 18
ENSG00000254639.1	1.11673	-1.43272	0.00324775	0.0351201	0.38	0.91	0.65	0.12	0.54	0.19	CTD-2589M5.5	chr11	lincRNA	--
ENSG00000059378.12	-0.770923	6.9578	1.45385e-13	1.19708e-11	21.69	21.33	27.42	39.34	38.52	39.3	PARP12	chr7	protein_coding	poly (ADP-ribose) polymerase family, member 12
ENSG00000233822.4	-0.587219	0.627436	0.00245241	0.0279961	0.2	0.18	0.25	0.31	0.31	0.31	HIST1H2BN	chr6	protein_coding	histone cluster 1, H2bn
ENSG00000168394.10	-1.30579	8.17835	8.10876e-36	1.95454e-33	48.4	48.57	67.2	128.21	134.34	132.98	TAP1	chr6	protein_coding	transporter 1, ATP-binding cassette, sub-family B (MDR/TAP)
ENSG00000007312.12	-1.38632	-2.11203	0.0090654	0.0769542	0.04	0.08	0.09	0.19	0.28	0.1	CD79B	chr17	protein_coding	CD79b molecule, immunoglobulin-associated beta
ENSG00000267121.5	-0.884384	1.37301	7.87287e-08	3.24569e-06	0.47	0.49	0.56	0.82	1	0.91	CTD-2020K17.1	chr17	antisense	--
ENSG00000133401.15	-1.08903	0.603814	5.91367e-08	2.47208e-06	0.06	0.07	0.1	0.15	0.19	0.15	PDZD2	chr5	protein_coding	PDZ domain containing 2
ENSG00000265263.1	-0.746692	1.24723	9.98114e-06	0.000263074	0.9	1.09	1.04	1.65	1.71	1.59	RP11-135L13.4	chr17	antisense	--
ENSG00000171564.11	-0.90227	6.67253	7.76657e-18	8.44128e-16	37.44	24.43	42.8	89.14	61.85	41.17	FGB	chr4	protein_coding	fibrinogen beta chain
ENSG00000267147.2	-0.606372	0.806145	0.00126879	0.0165746	1.65	1.48	1.95	2.13	2.21	3.17	CTC-548K16.1	chr19	lincRNA	--
ENSG00000280219.1	-1.59032	-2.23207	0.00540113	0.0523797	0	0.01	0.02	0.01	0.04	0.03	RP11-752L20.3	chr4	TEC	--
ENSG00000168970.20	0.635395	0.464917	0.00187555	0.0225496	0.41	0.6	0.4	0.31	0.32	0.26	JMJD7-PLA2G4B	chr15	protein_coding	JMJD7-PLA2G4B readthrough
ENSG00000124102.4	-1.45692	1.87937	1.21569e-21	1.65916e-19	2.72	3.6	3.39	8.19	8.97	8.83	PI3	chr20	protein_coding	peptidase inhibitor 3, skin-derived
ENSG00000100226.15	-0.623874	4.68824	1.3317e-08	6.11418e-07	3.86	3.72	3.92	5.55	5.79	5.93	GTPBP1	chr22	protein_coding	GTP binding protein 1
ENSG00000133067.17	-0.724735	1.78381	1.61877e-06	5.14716e-05	0.67	0.47	0.82	1.23	0.95	0.98	LGR6	chr1	protein_coding	leucine-rich repeat containing G protein-coupled receptor 6
ENSG00000228742.9	-0.710198	1.84296	1.7485e-06	5.53612e-05	0.8	0.75	0.65	1.1	1.14	1.27	RP5-884M6.1	chr7	lincRNA	--
ENSG00000246695.7	0.829482	-0.3781	0.0018849	0.0226075	0.23	0.26	0.31	0.14	0.13	0.16	RASSF8-AS1	chr12	antisense	RASSF8 atnisense RNA 1
ENSG00000147041.11	-0.924934	-0.885655	0.00396496	0.0411631	0.04	0.05	0.11	0.15	0.15	0.07	SYTL5	chrX	protein_coding	synaptotagmin-like 5
ENSG00000161921.14	-0.786426	5.1026	3.80932e-13	3.02008e-11	9.38	9.27	11.53	17.38	17.5	15.9	CXCL16	chr17	protein_coding	chemokine (C-X-C motif) ligand 16
ENSG00000231574.5	-1.19798	-0.0923278	1.34804e-06	4.36527e-05	0.18	0.19	0.15	0.5	0.36	0.32	RP11-91K9.1	chr3	lincRNA	--
ENSG00000205663.5	0.865881	-0.96011	0.00754256	0.0675102	0.18	0.22	0.12	0.06	0.12	0.1	RP11-706O15.5	chrX	lincRNA	--
ENSG00000154309.8	-0.706617	1.36329	1.65469e-05	0.000412829	0.36	0.38	0.43	0.66	0.67	0.53	DISP1	chr1	protein_coding	dispatched homolog 1 (Drosophila)
ENSG00000186847.5	-2.49659	-0.5791	9.63183e-15	8.72381e-13	0.03	0.23	0.05	0.73	0.63	0.41	KRT14	chr17	protein_coding	keratin 14, type I
ENSG00000132109.9	-0.697006	6.84174	2.37107e-11	1.53065e-09	43.16	38.08	51.12	69.4	71.83	68.03	TRIM21	chr11	protein_coding	tripartite motif containing 21
ENSG00000158125.9	-0.954641	2.36965	3.24735e-12	2.31647e-10	0.44	0.65	0.69	1.16	1.08	1.11	XDH	chr2	protein_coding	xanthine dehydrogenase
ENSG00000163131.10	-2.05791	5.43546	4.77763e-77	3.24542e-74	3.3	3.53	5.03	17.62	16.41	14.19	CTSS	chr1	protein_coding	cathepsin S
ENSG00000188004.9	-1.31642	-0.756969	2.09358e-05	0.000508326	0.12	0.14	0.09	0.32	0.28	0.26	C1orf204	chr1	protein_coding	chromosome 1 open reading frame 204
ENSG00000128335.13	-1.02924	7.1372	7.54393e-23	1.11837e-20	27.92	25.82	39.19	61.05	62.37	61.51	APOL2	chr22	protein_coding	apolipoprotein L, 2
ENSG00000256916.1	-2.12567	-2.8485	0.00819476	0.0712429	0	0.02	0.04	0.08	0.09	0.11	RP11-817J15.2	chr11	antisense	--
ENSG00000188089.13	-1.7849	-1.87322	0.000232283	0.00408876	0.02	0.03	0.01	0.06	0.03	0.09	PLA2G4E	chr15	protein_coding	phospholipase A2, group IVE
ENSG00000197121.14	0.595985	1.41892	0.00020185	0.00361696	0.24	0.22	0.32	0.26	0.14	0.11	PGAP1	chr2	protein_coding	post-GPI attachment to proteins 1
ENSG00000064835.10	-2.43325	-3.00036	0.00791611	0.0699806	0	0	0.04	0.1	0.03	0.08	POU1F1	chr3	protein_coding	POU class 1 homeobox 1
ENSG00000228288.6	0.71783	0.426762	0.000498463	0.00774353	1.8	2.38	2.08	1.2	1.12	1.39	PCAT6	chr1	antisense	prostate cancer associated transcript 6 (non-protein coding)
ENSG00000089692.8	-1.29688	-1.8731	0.00574897	0.0548455	0.05	0.06	0.05	0.15	0.12	0.14	LAG3	chr12	protein_coding	lymphocyte-activation gene 3
ENSG00000258867.5	-1.16984	-0.733844	0.000118483	0.00229212	0.2	0.11	0.28	0.5	0.43	0.37	LINC01146	chr14	lincRNA	long intergenic non-protein coding RNA 1146
ENSG00000116690.11	-2.05849	-0.608398	3.42954e-11	2.19029e-09	0.07	0.03	0.04	0.27	0.21	0.07	PRG4	chr1	protein_coding	proteoglycan 4
ENSG00000104808.7	-0.941907	-0.0167322	5.73651e-05	0.00121948	0.51	0.85	0.34	0.9	1.31	0.99	DHDH	chr19	protein_coding	dihydrodiol dehydrogenase (dimeric)
ENSG00000196684.12	-2.02615	3.71783	2.72575e-60	1.45482e-57	1.67	1.3	3.37	7.97	8.69	8.44	HSH2D	chr19	protein_coding	hematopoietic SH2 domain containing
ENSG00000030582.16	-0.717707	7.80053	4.146e-12	2.90211e-10	66.85	67.01	75.74	103.64	113.31	118.66	GRN	chr17	protein_coding	granulin
ENSG00000230526.1	-0.865898	-0.848814	0.00611722	0.0575685	0.73	0.31	0.92	1.01	1.4	1.06	RP11-472G21.2	chr10	lincRNA	--
ENSG00000274270.1	1.35503	-1.46859	0.000483885	0.00756029	0.16	0.18	0.15	0.07	0.05	0.07	RP11-34F20.7	chr13	sense_intronic	--
ENSG00000136244.11	-1.75397	2.42858	2.77068e-35	6.52071e-33	0.92	1.76	1.44	4.7	4.59	4.27	IL6	chr7	protein_coding	interleukin 6
ENSG00000124253.10	-1.52497	-1.28076	6.39956e-05	0.00134135	0.03	0.04	0.05	0.2	0.11	0.04	PCK1	chr20	protein_coding	phosphoenolpyruvate carboxykinase 1 (soluble)
ENSG00000268173.1	-1.69839	6.33701	2.45857e-56	1.20466e-53	6.27	6.63	8.65	20.95	23.61	23.53	PIK3R2	chr19	protein_coding	phosphoinositide-3-kinase, regulatory subunit 2 (beta)
ENSG00000130528.11	-4.44988	-3.43333	0.00808871	0.0706704	0	0	0	0.02	0.02	0.04	HRC	chr19	protein_coding	histidine rich calcium binding protein
ENSG00000239218.2	1.56154	-1.62465	0.000332288	0.00552379	0.25	0.33	0.32	0.06	0.12	0.12	RPS20P22	chr8	transcribed_processed_pseudogene	ribosomal protein S20 pseudogene 22
ENSG00000138496.16	-0.639695	7.34549	7.02443e-10	3.82428e-08	14.38	14.09	18.79	26.47	23.94	21.5	PARP9	chr3	protein_coding	poly (ADP-ribose) polymerase family, member 9
ENSG00000129538.13	-1.47882	-1.18621	5.17726e-05	0.00111567	0.07	0.09	0.23	0.35	0.34	0.37	RNASE1	chr14	protein_coding	ribonuclease, RNase A family, 1 (pancreatic)
ENSG00000269951.1	0.817651	-0.884135	0.00977217	0.0815184	0.9	1.2	0.59	0.63	0.34	0.53	RP11-797A18.6	chr15	sense_intronic	--
ENSG00000062038.13	-1.28566	-0.58637	8.76718e-06	0.000233341	0.05	0.06	0.1	0.14	0.13	0.21	CDH3	chr16	protein_coding	cadherin 3, type 1, P-cadherin (placental)
ENSG00000142619.4	0.59193	1.30206	0.00036887	0.00602138	0.79	1.02	0.84	0.53	0.64	0.55	PADI3	chr1	protein_coding	peptidyl arginine deiminase, type III
ENSG00000168268.10	0.810261	5.58928	3.12574e-14	2.72377e-12	27.87	26.32	22.76	13.76	14.22	14.77	NT5DC2	chr3	protein_coding	5'-nucleotidase domain containing 2
ENSG00000272604.1	0.670874	0.206955	0.00244707	0.0279589	0.62	0.42	0.49	0.33	0.36	0.25	RP11-251G23.5	chr7	antisense	--
ENSG00000272097.1	-0.926468	-0.849396	0.00341872	0.0366113	0.3	0.2	0.17	0.52	0.41	0.33	RP11-421M1.8	chr6	lincRNA	--
ENSG00000107201.9	-1.09265	7.01973	1.96891e-25	3.28764e-23	16.44	16.36	22.59	44.6	39.19	31.71	DDX58	chr9	protein_coding	DEAD (Asp-Glu-Ala-Asp) box polypeptide 58
ENSG00000132965.9	0.705445	-0.44993	0.00963148	0.0805697	0.61	0.66	0.67	0.4	0.36	0.4	ALOX5AP	chr13	protein_coding	arachidonate 5-lipoxygenase-activating protein
ENSG00000206811.1	0.592553	0.0725037	0.00918803	0.0777743	7.25	10.55	8.52	4.96	5.91	6.1	SNORA10	chr16	snoRNA	small nucleolar RNA, H/ACA box 10
ENSG00000168918.13	-1.09335	-1.06985	0.00131513	0.017017	0.08	0.04	0.03	0.13	0.11	0.08	INPP5D	chr2	protein_coding	inositol polyphosphate-5-phosphatase, 145kDa
ENSG00000124508.16	-0.625254	3.07902	4.242e-07	1.51843e-05	1.48	1.77	1.69	2.47	2.55	2.42	BTN2A2	chr6	protein_coding	butyrophilin, subfamily 2, member A2
ENSG00000181444.12	-0.925086	2.40192	1.20886e-11	8.04711e-10	1.38	1.1	1.36	2.18	2.57	2.34	ZNF467	chr7	protein_coding	zinc finger protein 467
ENSG00000119514.6	-0.813901	2.235	5.65713e-09	2.76284e-07	1.14	1.26	1.18	2.26	2.22	1.68	GALNT12	chr9	protein_coding	polypeptide N-acetylgalactosaminyltransferase 12
ENSG00000257718.1	0.824505	-0.123733	0.000693939	0.0101473	1.89	2.1	2.15	0.65	1.16	1.54	RP11-396F22.1	chr12	antisense	--
ENSG00000101197.12	-0.605057	0.16879	0.00612012	0.0575749	0.49	0.47	0.62	0.9	0.68	0.76	BIRC7	chr20	protein_coding	baculoviral IAP repeat containing 7
ENSG00000238741.1	-1.74724	-2.43377	0.00432505	0.0440118	0.17	0.16	0.17	0.16	0.92	0.61	SCARNA7	chr3	scaRNA	small Cajal body-specific RNA 7
ENSG00000228203.6	-0.886937	-0.390287	0.000744493	0.0107446	0.19	0.21	0.18	0.32	0.36	0.37	RNF144A-AS1	chr2	processed_transcript	RNF144A antisense RNA 1
ENSG00000120949.14	-0.980155	-1.28019	0.00847649	0.0729916	0.05	0.07	0.06	0.05	0.14	0.17	TNFRSF8	chr1	protein_coding	tumor necrosis factor receptor superfamily, member 8
ENSG00000272142.1	-1.01387	0.0102099	1.83482e-05	0.000452857	0.63	0.6	0.44	1	1.47	0.84	RP11-428J1.5	chr6	lincRNA	--
ENSG00000174059.16	-2.11368	-2.05542	0.00010128	0.00199682	0.01	0.01	0.01	0.03	0.03	0.03	CD34	chr1	protein_coding	CD34 molecule
ENSG00000266714.6	-0.645639	5.38106	1.6783e-09	8.73913e-08	3.07	2.86	3.61	4.85	4.78	4.91	MYO15B	chr17	protein_coding	myosin XVB
ENSG00000021355.12	-1.00377	7.4636	6.11677e-22	8.5833e-20	43.35	37.7	49.47	84.56	88.31	82.41	SERPINB1	chr6	protein_coding	serpin peptidase inhibitor, clade B (ovalbumin), member 1
ENSG00000105967.15	-2.56996	-2.11252	1.13699e-05	0.000296282	0.01	0	0	0.05	0.05	0.01	TFEC	chr7	protein_coding	transcription factor EC
ENSG00000204592.8	-1.50831	8.3892	8.1948e-47	2.987e-44	59.07	58.49	77.65	173.57	183.24	184.3	HLA-E	chr6	protein_coding	major histocompatibility complex, class I, E
ENSG00000247095.2	-0.782673	1.68433	3.12276e-07	1.1523e-05	0.83	0.97	1.13	1.26	1.8	1.84	MIR210HG	chr11	lincRNA	MIR210 host gene
ENSG00000248698.5	-1.68901	-1.8254	0.000330058	0.00548976	0.07	0.03	0.02	0.19	0.15	0.08	LINC01085	chr4	lincRNA	long intergenic non-protein coding RNA 1085
ENSG00000133328.3	-3.27669	2.12894	3.56045e-81	2.59557e-78	0.97	0.47	1.72	9.89	10.84	8.99	HRASLS2	chr11	protein_coding	HRAS-like suppressor 2
ENSG00000260257.2	1.1222	1.62139	8.00475e-13	6.15049e-11	1.97	1.85	1.87	0.84	0.85	0.86	RP5-1085F17.3	chr20	lincRNA	--
ENSG00000197448.13	-0.672243	6.98755	1.07199e-10	6.38263e-09	73.08	74.53	84.75	116.2	120.12	124.36	GSTK1	chr7	protein_coding	glutathione S-transferase kappa 1
ENSG00000204174.6	-0.880159	0.101534	0.000111465	0.002169	0.3	0.28	0.49	0.51	0.69	0.7	NPY4R	chr10	protein_coding	neuropeptide Y receptor Y4
ENSG00000054392.12	-0.772241	1.36111	2.42043e-06	7.39716e-05	0.27	0.26	0.29	0.51	0.39	0.46	HHAT	chr1	protein_coding	hedgehog acyltransferase
ENSG00000261840.2	1.0388	-0.823119	0.000835106	0.0117738	0.68	0.61	0.47	0.14	0.36	0.33	RP11-146F11.1	chr16	antisense	--
ENSG00000160013.8	-1.52521	-1.28104	6.39956e-05	0.00134135	0.06	0.09	0.07	0.16	0.29	0.15	PTGIR	chr19	protein_coding	prostaglandin I2 (prostacyclin) receptor (IP)
ENSG00000260328.1	-0.598724	0.738624	0.00142127	0.0181076	0.3	0.51	0.4	0.61	0.52	0.66	RP11-416I2.1	chr17	lincRNA	--
ENSG00000231007.5	0.60354	0.729857	0.00136261	0.0175321	1.12	1.53	1.11	0.51	1	0.9	CDC20P1	chr9	processed_pseudogene	cell division cycle 20 pseudogene 1
ENSG00000204531.15	-0.632267	0.686677	0.000907046	0.0125745	0.44	0.35	0.44	0.61	0.54	0.7	POU5F1	chr6	protein_coding	POU class 5 homeobox 1
ENSG00000085831.15	-1.07535	2.57299	1.15444e-15	1.12029e-13	0.45	0.31	0.48	0.87	0.9	0.77	TTC39A	chr1	protein_coding	tetratricopeptide repeat domain 39A
ENSG00000104537.16	-0.757471	3.76628	7.61607e-11	4.60803e-09	7.45	3.61	7.32	13.22	10.24	7	ANXA13	chr8	protein_coding	annexin A13
ENSG00000170373.8	-1.00451	5.22529	1.78191e-20	2.29567e-18	33.62	17.27	31.95	65.02	53.91	43.81	CST1	chr20	protein_coding	cystatin SN
ENSG00000278597.1	0.739914	0.860928	8.94707e-05	0.00179591	42.73	87.56	0	11.31	24.85	39.84	FP671120.7	chr21	miRNA	--
ENSG00000196187.11	-0.73648	3.26916	1.48425e-09	7.78295e-08	1.68	1.46	1.54	2.54	2.38	2.69	TMEM63A	chr1	protein_coding	transmembrane protein 63A
ENSG00000168065.15	-1.63207	-1.6681	0.000370285	0.00604118	0.03	0.01	0.05	0.14	0.04	0.11	SLC22A11	chr11	protein_coding	solute carrier family 22 (organic anion/urate transporter), member 11
ENSG00000241935.8	-0.701145	1.34502	1.92783e-05	0.000471916	0.66	0.78	0.76	1.26	1.16	1.08	HOGA1	chr10	protein_coding	4-hydroxy-2-oxoglutarate aldolase 1
ENSG00000011422.11	-0.661178	6.62804	2.51849e-10	1.44586e-08	30.87	35.23	35.32	49.17	51.72	55.22	PLAUR	chr19	protein_coding	plasminogen activator, urokinase receptor
ENSG00000203706.8	1.28466	-0.985356	9.7948e-05	0.00194265	0.52	0.67	0.68	0.13	0.3	0.3	SERTAD4-AS1	chr1	antisense	SERTAD4 antisense RNA 1
ENSG00000281332.1	0.752078	2.08624	1.13526e-07	4.54239e-06	1.96	2.07	1.78	1.12	1.23	1.02	LINC00997	chr7	lincRNA	long intergenic non-protein coding RNA 997
ENSG00000254154.8	-1.52611	1.03044	1.76518e-16	1.78846e-14	0.21	0.15	0.23	0.55	0.68	0.43	RP4-798P15.3	chr1	processed_transcript	--
ENSG00000203857.9	-1.98611	-0.962798	1.86105e-08	8.40829e-07	0.09	0.08	0.13	0.59	0.39	0.2	HSD3B1	chr1	protein_coding	hydroxy-delta-5-steroid dehydrogenase, 3 beta- and steroid delta-isomerase 1
ENSG00000184908.17	-2.99197	-3.1704	0.00671615	0.0617468	0	0	0.01	0.04	0.03	0.03	CLCNKB	chr1	protein_coding	chloride channel, voltage-sensitive Kb
ENSG00000177989.13	-1.17852	2.68546	6.00253e-19	7.23426e-17	3.29	2.85	4.29	7.2	7.62	8.15	ODF3B	chr22	protein_coding	outer dense fiber of sperm tails 3B
ENSG00000095585.16	-2.77224	-1.97479	8.04745e-07	2.7302e-05	0.05	0.01	0	0.22	0.11	0.15	BLNK	chr10	protein_coding	B-cell linker
ENSG00000089169.14	-1.5326	-0.314135	1.6316e-08	7.434e-07	0.11	0.03	0.08	0.14	0.24	0.25	RPH3A	chr12	protein_coding	rabphilin 3A
ENSG00000128394.16	-1.23072	3.24781	3.25336e-23	4.98495e-21	1.66	1.67	2.07	4.23	3.88	4.25	APOBEC3F	chr22	protein_coding	apolipoprotein B mRNA editing enzyme, catalytic polypeptide-like 3F
ENSG00000272395.5	-4.18523	-0.640427	1.8042e-24	2.93075e-22	0.06	0	0.03	0.35	0.84	0.5	IFNL4	chr19	polymorphic_pseudogene	interferon, lambda 4 (gene/pseudogene)
ENSG00000170049.9	0.656072	-0.182856	0.00664433	0.0614457	0.37	0.33	0.51	0.21	0.2	0.33	KCNAB3	chr17	protein_coding	potassium channel, voltage gated subfamily A regulatory beta subunit 3
ENSG00000173237.4	-0.649826	4.1109	9.62943e-09	4.51828e-07	10.7	10.39	11.79	15.61	16.14	18.45	C11orf86	chr11	protein_coding	chromosome 11 open reading frame 86
ENSG00000006118.14	-0.719477	7.08131	4.76405e-12	3.32203e-10	26.27	29.68	29.56	41.29	46.19	49.5	TMEM132A	chr11	protein_coding	transmembrane protein 132A
ENSG00000274026.1	0.754148	0.58281	0.00013415	0.00255419	1.07	1.15	1.1	0.61	0.59	0.72	FAM27E3	chr9	transcribed_processed_pseudogene	family with sequence similarity 27, member E3
ENSG00000282301.1	-4.61239	-3.36302	0.00408448	0.0421259	0	0	0	0.13	0	0	CYP3A7-CYP3A51P	chr7	protein_coding	CYP3A7-CYP3A51P readthrough
ENSG00000275530.1	-1.09804	-1.54772	0.00607497	0.0572868	0.49	8.19	0.51	0	14.04	5.43	FP671120.4	chr21	miRNA	--
ENSG00000236617.2	1.22639	-1.82336	0.00837477	0.0724286	0.45	0.53	0.71	0.19	0.27	0.23	RP11-46H11.12	chr12	antisense	--
ENSG00000164171.10	-0.606163	4.70286	3.26741e-08	1.41947e-06	2.14	2.76	2.73	4.5	3.62	3.22	ITGA2	chr5	protein_coding	integrin, alpha 2 (CD49B, alpha 2 subunit of VLA-2 receptor)
ENSG00000185338.4	-1.00186	1.30738	2.33413e-09	1.19256e-07	1.12	1.17	1.53	2.52	2.42	2.5	SOCS1	chr16	protein_coding	suppressor of cytokine signaling 1
ENSG00000164307.12	-0.991654	4.71172	2.46556e-19	3.00788e-17	1.84	2.41	2.62	4.93	4.51	3.9	ERAP1	chr5	protein_coding	endoplasmic reticulum aminopeptidase 1
ENSG00000204709.4	-1.60158	-1.29719	3.38502e-05	0.000775882	0.18	0.41	0.49	1.42	1.2	0.6	LINC01556	chr6	lincRNA	long intergenic non-protein coding RNA 1556
ENSG00000183831.6	-1.27402	-1.80187	0.00493696	0.0486036	0.08	0.11	0.08	0.26	0.26	0.12	ANKRD45	chr1	protein_coding	ankyrin repeat domain 45
ENSG00000206503.11	-1.87781	8.88392	2.98601e-70	1.85935e-67	79.04	89.69	119.09	337.9	341.46	351.18	HLA-A	chr6	protein_coding	major histocompatibility complex, class I, A
ENSG00000268460.1	-0.833687	0.819408	7.38331e-06	0.000200801	0.42	0.44	0.4	0.86	0.7	0.66	DKFZp434J0226	chr19	processed_transcript	--
ENSG00000186280.6	-0.782091	-0.329932	0.00292057	0.0322948	0.18	0.14	0.22	0.3	0.33	0.26	KDM4D	chr11	protein_coding	lysine (K)-specific demethylase 4D
ENSG00000169174.10	-1.94657	1.93301	3.36424e-35	7.85577e-33	0.42	0.3	0.51	1.55	1.58	1.51	PCSK9	chr1	protein_coding	proprotein convertase subtilisin/kexin type 9
ENSG00000231233.1	-2.22492	-2.5462	0.00107834	0.0145183	0.03	0	0.11	0.27	0.32	0.1	CFAP58-AS1	chr10	antisense	CFAP58 antisense RNA 1 (head to head)
ENSG00000260841.1	0.842188	-0.370543	0.00152027	0.0190842	0.24	0.39	0.24	0.2	0.13	0.15	CTC-205M6.5	chr5	sense_overlapping	--
ENSG00000135148.11	-0.889604	5.30134	1.52231e-16	1.54763e-14	7.95	7.63	9.32	15.11	15.08	14.77	TRAFD1	chr12	protein_coding	TRAF-type zinc finger domain containing 1
ENSG00000263244.2	0.587926	4.58605	9.58102e-08	3.91212e-06	3.06	3.81	3.19	2.51	2.09	1.94	RP11-473I1.9	chr16	3prime_overlapping_ncrna	--
ENSG00000041982.14	0.592619	0.327861	0.00482386	0.0477419	0.12	0.2	0.14	0.14	0.09	0.07	TNC	chr9	protein_coding	tenascin C
ENSG00000167550.10	-0.801885	2.57727	1.44287e-09	7.59259e-08	3.26	3.1	4	4.89	5.91	6.75	RHEBL1	chr12	protein_coding	Ras homolog enriched in brain like 1
ENSG00000182704.7	-0.744345	8.36095	5.76677e-13	4.47696e-11	62.21	56.35	67.23	95.71	103.86	103.71	TSKU	chr11	protein_coding	tsukushi, small leucine rich proteoglycan
ENSG00000136367.13	-0.826138	1.18405	1.3834e-06	4.45084e-05	0.16	0.18	0.16	0.31	0.26	0.27	ZFHX2	chr14	protein_coding	zinc finger homeobox 2
ENSG00000254389.3	-0.599594	0.943171	0.000934299	0.0129104	0.68	0.7	0.87	1.05	1.31	0.96	RHPN1-AS1	chr8	antisense	RHPN1 antisense RNA 1 (head to head)
ENSG00000260777.1	-2.13516	-0.444724	4.88716e-13	3.83392e-11	0.03	0.05	0.19	0.41	0.37	0.36	CTD-2008P7.1	chr17	lincRNA	--
ENSG00000176919.11	-1.09441	-0.897964	0.000557238	0.00848028	0.35	0.25	0.43	0.83	0.59	0.74	C8G	chr9	protein_coding	complement component 8, gamma polypeptide
ENSG00000279912.1	0.946666	-0.776882	0.00198913	0.0236046	0.15	0.21	0.16	0.12	0.08	0.06	RP11-624A21.1	chr15	TEC	--
ENSG00000259347.5	-4.45002	-3.43326	0.00808871	0.0706704	0	0	0	0.02	0.02	0.14	RP11-798K3.2	chr15	lincRNA	--
ENSG00000234546.2	-0.928667	-0.39046	0.00042272	0.00672431	0.59	0.47	0.37	0.7	1.03	0.93	RP3-510D11.2	chr1	lincRNA	--
ENSG00000174567.7	-1.18193	2.7057	3.35073e-19	4.07114e-17	4.65	4.16	4.2	9.98	9.51	9.3	GOLT1A	chr1	protein_coding	golgi transport 1A
ENSG00000153832.11	-0.663661	1.85947	7.47938e-06	0.000202309	0.81	0.89	0.87	1.64	1.28	1.07	FBXO36	chr2	protein_coding	F-box protein 36
ENSG00000026950.16	-1.07906	4.02986	5.13106e-21	6.78594e-19	2.26	2.07	2.93	5.39	4.89	4.68	BTN3A1	chr6	protein_coding	butyrophilin, subfamily 3, member A1
ENSG00000269939.1	0.992894	-0.95942	0.00220596	0.0255954	0.47	0.39	0.32	0.16	0.18	0.23	RP11-727A23.11	chr11	lincRNA	--
ENSG00000272017.1	1.03252	-1.09574	0.00232097	0.0268116	0.5	0.59	0.54	0.18	0.28	0.3	RP1-199J3.7	chr6	antisense	--
ENSG00000272123.1	4.51308	-3.43282	0.00808871	0.0706704	0.24	0.18	0.06	0	0	0	CTD-2366F13.2	chr5	antisense	--
ENSG00000233077.1	-1.0338	-0.935944	0.00128479	0.0167034	0.09	0.14	0.16	0.25	0.25	0.29	LINC01271	chr20	lincRNA	long intergenic non-protein coding RNA 1271
ENSG00000226332.2	0.726679	0.869727	7.01752e-05	0.00144753	3.76	2.85	2.87	1.67	2.16	1.75	RP11-157P1.4	chr20	antisense	--
ENSG00000227766.1	-1.47956	-0.567901	3.63983e-07	1.31868e-05	0.17	0.41	0.37	0.77	1.15	0.66	HCG4P5	chr6	unprocessed_pseudogene	HLA complex group 4 pseudogene 5
ENSG00000227232.5	-0.673872	0.650588	0.000431308	0.00684618	0.33	1.54	0.63	1.13	1.22	1.54	WASH7P	chr1	unprocessed_pseudogene	WAS protein family homolog 7 pseudogene
ENSG00000240399.1	1.33095	-1.68774	0.00258436	0.0292148	0.42	0.45	0.51	0.17	0.07	0.29	RP1-228P16.1	chr12	transcribed_processed_pseudogene	--
ENSG00000280623.1	-2.43328	-3.00063	0.00791611	0.0699806	0.01	0.01	0	0.02	0.03	0.02	PCAT14	chr22	lincRNA	prostate cancer associated transcript 14 (non-protein coding)
ENSG00000154188.9	-1.27699	-1.97439	0.00960334	0.0804469	0.07	0.07	0.07	0.14	0.22	0.17	ANGPT1	chr8	protein_coding	angiopoietin 1
ENSG00000274259.2	2.0526	-2.71003	0.00794518	0.0700719	0.25	0.17	0.18	0.07	0.03	0.03	XXbac-BPG294E21.9	chr6	antisense	--
ENSG00000161912.17	1.16026	-1.58397	0.00374854	0.0392298	0.07	0.06	0.07	0.04	0.02	0.03	ADCY10P1	chr6	transcribed_unprocessed_pseudogene	adenylate cyclase 10 (soluble) pseudogene 1
ENSG00000165731.17	-2.49648	1.15547	1.8867e-37	4.86134e-35	0.07	0.09	0.14	0.5	0.6	0.5	RET	chr10	protein_coding	ret proto-oncogene
ENSG00000258818.3	-0.852655	3.75433	2.61733e-13	2.1258e-11	4.14	2.36	4.15	8.66	5.92	4.3	RNASE4	chr14	protein_coding	ribonuclease, RNase A family, 4
ENSG00000187837.3	-0.660532	5.18991	8.83776e-10	4.76808e-08	46.05	39.38	42.61	64.88	67.09	65.36	HIST1H1C	chr6	protein_coding	histone cluster 1, H1c
ENSG00000122884.12	-0.63129	5.42652	3.61055e-09	1.79859e-07	10.17	10.62	12.75	18.82	18.01	13.93	P4HA1	chr10	protein_coding	prolyl 4-hydroxylase, alpha polypeptide I
ENSG00000271551.2	2.0553	-2.50638	0.00289864	0.0320848	0.07	0.17	0.23	0.04	0.04	0.02	RP11-230C9.2	chr6	antisense	--
ENSG00000125910.5	-2.0696	-2.08365	0.000162786	0.00302018	0.07	0.03	0.02	0.12	0.24	0.16	S1PR4	chr19	protein_coding	sphingosine-1-phosphate receptor 4
ENSG00000129159.6	-1.87089	-2.36316	0.0017314	0.0211569	0.01	0	0.01	0.01	0.02	0.03	KCNC1	chr11	protein_coding	potassium channel, voltage gated Shaw related subfamily C, member 1
ENSG00000149380.11	-0.739938	3.85031	1.42515e-10	8.35224e-09	4.59	4.58	4.6	7.62	7.66	7.15	P4HA3	chr11	protein_coding	prolyl 4-hydroxylase, alpha polypeptide III
ENSG00000236204.5	-0.944033	-0.606669	0.000980077	0.0134559	0.12	0.16	0.19	0.3	0.31	0.27	LINC01376	chr2	lincRNA	long intergenic non-protein coding RNA 1376
ENSG00000204389.9	0.656359	7.44573	2.43681e-10	1.40878e-08	87.29	83.65	79.23	51.53	51.49	51.7	HSPA1A	chr6	protein_coding	heat shock 70kDa protein 1A
ENSG00000173557.14	-1.41367	-1.17135	9.27053e-05	0.00185466	0.14	0.32	0.33	0.76	0.6	0.73	C2orf70	chr2	protein_coding	chromosome 2 open reading frame 70
ENSG00000269706.1	2.65769	-2.9472	0.00454226	0.0455736	0.39	0.17	0.04	0.04	0	0.04	CTB-60B18.15	chr19	unprocessed_pseudogene	--
ENSG00000163644.14	-0.824094	2.46067	1.04975e-09	5.62296e-08	0.42	0.37	0.56	0.86	0.82	0.64	PPM1K	chr4	protein_coding	protein phosphatase, Mg2+/Mn2+ dependent, 1K
ENSG00000257732.1	-0.647046	-0.134924	0.0092632	0.0782776	0.75	1.12	0.89	1.36	1.74	1.12	RP11-818F20.5	chr12	antisense	--
ENSG00000049239.12	-0.607896	3.64545	2.08379e-07	7.95434e-06	1	0.95	1.13	1.44	1.51	1.62	H6PD	chr1	protein_coding	hexose-6-phosphate dehydrogenase (glucose 1-dehydrogenase)
ENSG00000224141.5	1.46544	-2.13944	0.00617921	0.0579876	0.16	0.15	0.3	0.04	0.15	0.02	AL109763.2	chr21	lincRNA	--
ENSG00000125775.14	-1.02609	-0.825457	0.000835106	0.0117738	0.09	0.21	0.21	0.32	0.28	0.42	SDCBP2	chr20	protein_coding	syndecan binding protein (syntenin) 2
ENSG00000269243.1	1.21736	-1.75429	0.00424072	0.0434525	0.13	0.06	0.06	0.03	0.06	0.01	CTD-2231E14.8	chr19	antisense	--
ENSG00000121297.6	0.895799	-0.183157	0.000291241	0.00493196	0.13	0.2	0.24	0.06	0.12	0.11	TSHZ3	chr19	protein_coding	teashirt zinc finger homeobox 3
ENSG00000159713.10	-0.789718	0.150191	0.000402388	0.00647307	0.45	0.23	0.28	0.59	0.56	0.48	TPPP3	chr16	protein_coding	tubulin polymerization-promoting protein family member 3
ENSG00000237356.5	-2.29128	-2.5077	0.000644936	0.0095665	0.05	0	0.02	0.08	0.13	0.12	AL163953.3	chr14	processed_transcript	--
ENSG00000151883.16	-0.941894	0.0233917	6.27402e-05	0.00132039	0.07	0.11	0.05	0.14	0.15	0.14	PARP8	chr5	protein_coding	poly (ADP-ribose) polymerase family, member 8
ENSG00000273445.1	-3.24117	0.40846	1.24367e-35	2.97376e-33	0.26	0.25	0.79	3.42	4.51	3.99	RP11-1399P15.1	chr2	antisense	--
ENSG00000240563.1	1.1936	-0.998665	0.000299143	0.0050486	0.16	0.15	0.15	0.06	0.07	0.07	L1TD1	chr1	protein_coding	LINE-1 type transposase domain containing 1
ENSG00000136040.8	-1.90225	0.257168	4.2261e-16	4.19648e-14	0.07	0.04	0.06	0.28	0.24	0.13	PLXNC1	chr12	protein_coding	plexin C1
ENSG00000117115.12	1.10634	0.548256	5.40605e-08	2.26622e-06	0.39	0.39	0.45	0.22	0.12	0.22	PADI2	chr1	protein_coding	peptidyl arginine deiminase, type II
ENSG00000071073.12	0.639328	0.604872	0.00116695	0.01544	0.21	0.17	0.19	0.13	0.12	0.11	MGAT4A	chr2	protein_coding	mannosyl (alpha-1,3-)-glycoprotein beta-1,4-N-acetylglucosaminyltransferase, isozyme A
ENSG00000140481.13	-1.47034	-1.45232	0.00033886	0.00561429	0.04	0.04	0.04	0.08	0.12	0.14	CCDC33	chr15	protein_coding	coiled-coil domain containing 33
ENSG00000145390.11	0.650297	2.31789	2.08118e-06	6.45275e-05	0.79	0.9	0.93	0.7	0.51	0.42	USP53	chr4	protein_coding	ubiquitin specific peptidase 53
ENSG00000125347.13	-1.0918	6.39805	4.84206e-25	7.99582e-23	13.06	12.6	15.66	28.21	28.32	29.3	IRF1	chr5	protein_coding	interferon regulatory factor 1
ENSG00000260035.1	-2.72562	-2.8486	0.00146987	0.0185684	0	0.18	0	0.51	0.16	0.66	CTD-2651B20.6	chr15	sense_intronic	--
ENSG00000126091.19	-0.793019	1.57755	4.51108e-07	1.60705e-05	0.79	0.69	1.01	1.41	1.36	1.44	ST3GAL3	chr1	protein_coding	ST3 beta-galactoside alpha-2,3-sialyltransferase 3
ENSG00000226981.2	2.05518	-2.50639	0.00289864	0.0320848	0.11	0.21	0.24	0.03	0.05	0.05	ABHD17AP6	chr17	unprocessed_pseudogene	abhydrolase domain containing 17A pseudogene 6
ENSG00000269113.3	-1.0421	0.391697	7.17966e-07	2.47512e-05	0.09	0.11	0.14	0.2	0.28	0.2	TRABD2B	chr1	protein_coding	TraB domain containing 2B
ENSG00000136514.2	-3.40958	1.54483	5.64882e-67	3.31054e-64	0.28	0.1	0.53	3.26	3.05	3.15	RTP4	chr3	protein_coding	receptor (chemosensory) transporter protein 4
ENSG00000260563.3	0.69248	0.711087	0.000278861	0.00473572	1.64	1.54	1.61	0.82	1	1.06	RP13-516M14.1	chr17	lincRNA	--
ENSG00000250799.9	-1.5212	0.905156	1.04418e-15	1.0166e-13	0.81	0.26	0.56	2	1.71	0.85	PRODH2	chr19	protein_coding	proline dehydrogenase (oxidase) 2
ENSG00000141526.14	-0.752223	8.00185	3.6026e-13	2.88681e-11	34.5	33.49	39.49	53.3	58.95	63.96	SLC16A3	chr17	protein_coding	solute carrier family 16 (monocarboxylate transporter), member 3
ENSG00000104888.9	-0.700141	0.0951907	0.00208785	0.0244051	0.31	0.23	0.19	0.35	0.37	0.43	SLC17A7	chr19	protein_coding	solute carrier family 17 (vesicular glutamate transporter), member 7
ENSG00000146166.16	-0.591249	2.71187	5.35257e-06	0.000150785	0.84	0.76	1	1.46	1.34	1.01	LGSN	chr6	protein_coding	lengsin, lens protein with glutamine synthetase domain
ENSG00000224080.1	1.77331	-2.19943	0.00151039	0.018984	0.37	0.54	0.76	0.18	0.06	0.23	UBE2FP1	chr3	processed_pseudogene	ubiquitin-conjugating enzyme E2F (putative) pseudogene 1
ENSG00000237004.3	1.08755	-1.62551	0.007134	0.064693	0.81	1.16	0.45	0.72	0.29	0.11	ZNRF2P1	chr7	processed_pseudogene	zinc and ring finger 2 pseudogene 1
ENSG00000113532.12	-0.813637	3.95847	1.32478e-12	9.94883e-11	1.53	1.24	1.68	3.21	2.57	1.89	ST8SIA4	chr5	protein_coding	ST8 alpha-N-acetyl-neuraminide alpha-2,8-sialyltransferase 4
ENSG00000174564.12	-0.93579	1.34456	1.87375e-08	8.44711e-07	0.86	0.74	0.82	1.61	1.43	1.47	IL20RB	chr3	protein_coding	interleukin 20 receptor beta
ENSG00000095596.11	0.692638	0.129483	0.00208598	0.0244023	0.48	0.49	0.55	0.28	0.34	0.3	CYP26A1	chr10	protein_coding	cytochrome P450, family 26, subfamily A, polypeptide 1
ENSG00000168062.9	-1.47986	6.43388	7.86525e-44	2.5009e-41	15.75	14.74	26.17	49.54	52.58	51.87	BATF2	chr11	protein_coding	basic leucine zipper transcription factor, ATF-like 2
ENSG00000181577.15	-1.37862	0.989751	8.92012e-14	7.48914e-12	0.25	0.16	0.38	0.61	0.63	0.76	C6orf223	chr6	protein_coding	chromosome 6 open reading frame 223
ENSG00000274267.1	-1.00607	-0.83633	0.0010913	0.0146335	1.01	0.33	1.03	1.8	0.68	2.16	HIST1H3B	chr6	protein_coding	histone cluster 1, H3b
ENSG00000053524.11	-4.75809	-3.29614	0.002065	0.0242138	0	0	0	0	0.03	0	MCF2L2	chr3	protein_coding	MCF.2 cell line derived transforming sequence-like 2
ENSG00000173890.16	-0.985092	1.66809	2.28343e-10	1.32523e-08	0.88	0.97	1.14	2.16	2.15	1.45	GPR160	chr3	protein_coding	G protein-coupled receptor 160
ENSG00000277287.1	-0.980148	-1.27998	0.00847649	0.0729916	0.02	0.05	0.05	0.06	0.07	0.11	RP4-794I6.4	chr20	lincRNA	--
ENSG00000184489.11	-0.992561	2.25434	1.6034e-12	1.18039e-10	1.16	0.83	1.2	2.02	1.97	2.19	PTP4A3	chr8	protein_coding	protein tyrosine phosphatase type IVA, member 3
ENSG00000198400.11	-1.27424	-1.80177	0.00493696	0.0486036	0.06	0.04	0.02	0.1	0.12	0.09	NTRK1	chr1	protein_coding	neurotrophic tyrosine kinase, receptor, type 1
ENSG00000102962.4	-3.46609	-2.39838	2.33968e-06	7.17236e-05	0.02	0	0	0.06	0.09	0.09	CCL22	chr16	protein_coding	chemokine (C-C motif) ligand 22
ENSG00000213413.2	4.51287	-3.43292	0.00808871	0.0706704	0.07	0.07	0	0	0	0	PVRIG	chr7	protein_coding	poliovirus receptor related immunoglobulin domain containing
ENSG00000125510.15	-0.770762	-0.434203	0.00497276	0.04887	0.17	0.11	0.14	0.22	0.24	0.22	OPRL1	chr20	protein_coding	opiate receptor-like 1
ENSG00000103196.11	0.821873	0.840323	7.84253e-06	0.000211557	0.33	0.48	0.49	0.21	0.24	0.27	CRISPLD2	chr16	protein_coding	cysteine-rich secretory protein LCCL domain containing 2
ENSG00000130775.15	-1.61954	3.47026	3.28495e-39	9.00768e-37	1.66	1.61	2.51	5.34	5.57	6.36	THEMIS2	chr1	protein_coding	thymocyte selection associated family member 2
ENSG00000198732.10	-1.05248	4.13879	2.40879e-20	3.07677e-18	2.94	2.46	3.63	6.57	6.12	5.6	SMOC1	chr14	protein_coding	SPARC related modular calcium binding 1
ENSG00000164078.12	-0.807541	3.91737	2.10442e-12	1.53787e-10	2.32	2.25	2.1	3.7	3.75	3.93	MST1R	chr3	protein_coding	macrophage stimulating 1 receptor
ENSG00000100342.20	-2.07862	8.0723	5.04422e-84	4.18796e-81	26.33	25.56	44.36	131.21	131.72	133.42	APOL1	chr22	protein_coding	apolipoprotein L, 1
ENSG00000235944.7	-0.848378	0.0241132	0.000294313	0.00497834	0.49	0.42	0.27	0.61	0.75	0.71	ZNF815P	chr7	transcribed_unprocessed_pseudogene	zinc finger protein 815, pseudogene
ENSG00000165259.13	-0.700694	1.59237	7.11887e-06	0.000194494	0.32	0.33	0.38	0.64	0.57	0.43	HDX	chrX	protein_coding	highly divergent homeobox
ENSG00000265962.1	-0.656315	1.7657	1.37072e-05	0.000349413	3.81	2.57	2.84	5.55	4.25	4.4	GACAT2	chr18	antisense	gastric cancer associated transcript 2 (non-protein coding)
ENSG00000106366.8	-0.595009	8.53192	7.6715e-09	3.6687e-07	82.06	100.92	86.39	131.56	127.15	137.44	SERPINE1	chr7	protein_coding	serpin peptidase inhibitor, clade E (nexin, plasminogen activator inhibitor type 1), member 1
ENSG00000177409.11	-1.33067	4.00583	1.13591e-30	2.32542e-28	1	1.06	1.66	3.83	3.26	2.05	SAMD9L	chr7	protein_coding	sterile alpha motif domain containing 9-like
ENSG00000104805.15	-0.616233	7.59457	2.64006e-09	1.33744e-07	53.09	56.87	56.63	77.69	82.12	88.74	NUCB1	chr19	protein_coding	nucleobindin 1
ENSG00000090339.8	-1.40516	2.9528	1.64697e-27	2.94768e-25	0.82	1.41	1.53	3.06	2.9	3.73	ICAM1	chr19	protein_coding	intercellular adhesion molecule 1
ENSG00000166816.13	-0.730281	1.07491	2.79351e-05	0.00065641	0.51	0.73	0.93	1.02	1.42	1.05	LDHD	chr16	protein_coding	lactate dehydrogenase D
ENSG00000240875.5	-0.794001	0.356106	0.000162467	0.00301613	0.28	0.27	0.24	0.41	0.54	0.38	LINC00886	chr3	lincRNA	long intergenic non-protein coding RNA 886
ENSG00000258457.5	-0.842556	-0.935899	0.00825074	0.0716462	0.1	0.32	0.3	0.47	0.36	0.44	RP11-298I3.4	chr14	antisense	--
ENSG00000143416.20	-0.703245	4.47124	2.52514e-10	1.44586e-08	9.82	5.57	9.57	14.66	13.57	11.51	SELENBP1	chr1	protein_coding	selenium binding protein 1
ENSG00000274627.1	0.87028	-0.0385812	0.000207754	0.00370719	0.17	0.22	0.25	0.11	0.1	0.13	RP11-104N10.2	chr16	sense_intronic	--
ENSG00000213057.5	0.871748	-0.554503	0.0018451	0.0222192	0.33	0.37	0.22	0.2	0.15	0.14	C1orf220	chr1	lincRNA	chromosome 1 open reading frame 220
ENSG00000170476.15	-1.65984	-2.3293	0.00394612	0.0410245	0.13	0	0.1	0.29	0.31	0.15	MZB1	chr5	protein_coding	marginal zone B and B1 cell-specific protein
ENSG00000171174.13	-0.643776	3.69117	3.49123e-08	1.50794e-06	5.16	4.16	5.19	7.05	7.57	7.46	RBKS	chr2	protein_coding	ribokinase
ENSG00000167281.18	-0.847894	2.41926	4.10261e-10	2.28176e-08	1.02	0.89	1.3	1.94	1.88	1.81	RBFOX3	chr17	protein_coding	RNA binding protein, fox-1 homolog (C. elegans) 3
ENSG00000261254.2	1.43366	-2.05366	0.00535709	0.0520371	0.05	0.05	0.06	0.02	0.01	0.02	RP4-714D9.5	chr1	sense_overlapping	--
ENSG00000153294.11	-0.686314	2.68621	1.35411e-07	5.35358e-06	1.37	1.42	1.4	2.22	2.21	2.15	ADGRF4	chr6	protein_coding	adhesion G protein-coupled receptor F4
ENSG00000157601.13	-1.22389	9.5696	4.97803e-32	1.07042e-29	94.15	90.07	144.16	247.21	252.93	247.75	MX1	chr21	protein_coding	MX dynamin-like GTPase 1
ENSG00000161270.19	-0.8688	-0.480714	0.00140191	0.0179527	0.1	0.13	0.09	0.24	0.19	0.14	NPHS1	chr19	protein_coding	nephrosis 1, congenital, Finnish type (nephrin)
ENSG00000263740.2	-5.01276	-3.17041	0.000529739	0.00812385	0	0	0	0.18	0.26	0.6	RN7SL4P	chr3	misc_RNA	RNA, 7SL, cytoplasmic 4, pseudogene
ENSG00000162946.20	-0.592311	0.693963	0.0020757	0.0243106	0.13	0.11	0.09	0.16	0.17	0.15	DISC1	chr1	protein_coding	disrupted in schizophrenia 1
ENSG00000135094.10	-1.1878	2.81547	7.68323e-20	9.48942e-18	2.97	1.9	2.84	4.9	5.96	6.22	SDS	chr12	protein_coding	serine dehydratase
ENSG00000205403.12	-1.15544	3.06176	5.82653e-20	7.22611e-18	2.26	1.52	2.54	5.85	4.33	3.61	CFI	chr4	protein_coding	complement factor I
ENSG00000183709.7	-3.12588	2.88737	3.02716e-98	3.47996e-95	1.27	2.16	2.5	15.29	16.9	18.2	IFNL2	chr19	protein_coding	interferon, lambda 2
ENSG00000205413.7	-1.11136	4.96338	3.2471e-24	5.24609e-22	2.25	2.73	3.39	7.78	6.26	3.69	SAMD9	chr7	protein_coding	sterile alpha motif domain containing 9
ENSG00000132002.7	0.592739	7.70223	9.9575e-09	4.65758e-07	104.13	100.42	93.37	61.53	65.72	65.21	DNAJB1	chr19	protein_coding	DnaJ (Hsp40) homolog, subfamily B, member 1
ENSG00000130164.11	-0.594769	3.30462	8.67572e-07	2.92344e-05	1.74	2.21	2.25	2.82	2.94	3.34	LDLR	chr19	protein_coding	low density lipoprotein receptor
ENSG00000131378.13	-0.979219	1.8838	5.03332e-11	3.16718e-09	0.59	0.8	0.89	1.37	1.5	1.51	RFTN1	chr3	protein_coding	raftlin, lipid raft linker 1
ENSG00000165591.6	-1.35144	-1.75589	0.00241633	0.0276818	0.07	0.07	0.06	0.16	0.17	0.17	FAAH2	chrX	protein_coding	fatty acid amide hydrolase 2
ENSG00000231172.2	-1.06146	1.55902	3.64821e-11	2.32498e-09	1.74	0.82	2.03	3.59	2.98	2.78	AC007099.1	chr2	antisense	--
ENSG00000130202.9	-0.89635	7.54986	6.71e-18	7.34634e-16	33.9	34.17	39.77	60.14	66.63	68.67	PVRL2	chr19	protein_coding	poliovirus receptor-related 2 (herpesvirus entry mediator B)
ENSG00000116544.11	-0.784936	-0.733708	0.00738039	0.0664836	0.1	0.12	0.08	0.2	0.12	0.19	DLGAP3	chr1	protein_coding	discs, large (Drosophila) homolog-associated protein 3
ENSG00000182287.13	0.673533	3.65876	8.23237e-09	3.89948e-07	2.91	3.05	2.58	2.1	1.61	1.53	AP1S2	chrX	protein_coding	adaptor-related protein complex 1, sigma 2 subunit
ENSG00000006534.15	-0.725451	7.42502	2.77583e-12	1.9944e-10	43.22	38.18	47.13	65.11	69.75	72.18	ALDH3B1	chr11	protein_coding	aldehyde dehydrogenase 3 family, member B1
ENSG00000272168.5	-0.68978	2.10988	1.22286e-06	4.01207e-05	0.3	0.26	0.29	0.51	0.44	0.39	CASC15	chr6	lincRNA	cancer susceptibility candidate 15 (non-protein coding)
ENSG00000128262.8	-1.1973	-0.092038	1.34804e-06	4.36527e-05	0.07	0.11	0.14	0.23	0.24	0.22	POM121L9P	chr22	transcribed_unprocessed_pseudogene	POM121 transmembrane nucleoporin-like 9, pseudogene
ENSG00000173391.8	-1.46415	-1.60678	0.000484753	0.00756989	0.03	0.1	0.03	0.19	0.17	0.09	OLR1	chr12	protein_coding	oxidized low density lipoprotein (lectin-like) receptor 1
ENSG00000124942.13	0.712119	7.57382	6.43767e-12	4.4031e-10	10.81	13.9	11.13	7.09	6.91	7.3	AHNAK	chr11	protein_coding	AHNAK nucleoprotein
ENSG00000226887.7	0.805011	1.0358	4.77406e-06	0.000136417	0.61	0.66	0.61	0.31	0.37	0.37	ERVMER34-1	chr4	protein_coding	endogenous retrovirus group MER34, member 1
ENSG00000232645.5	1.35004	-1.18319	0.00013034	0.00249566	0.82	0.65	0.84	0.15	0.11	0.61	LINC01431	chr20	lincRNA	long intergenic non-protein coding RNA 1431
ENSG00000170801.9	-1.00466	0.885938	6.30196e-08	2.62339e-06	0.33	0.33	0.38	0.73	0.58	0.73	HTRA3	chr4	protein_coding	HtrA serine peptidase 3
ENSG00000149922.10	-0.764863	-0.489148	0.00494071	0.0486246	0.13	0.15	0.17	0.29	0.19	0.27	TBX6	chr16	protein_coding	T-box 6
ENSG00000110446.9	-2.30133	2.98402	1.09472e-63	6.05926e-61	1	0.8	1.83	5.5	5.99	5.93	SLC15A3	chr11	protein_coding	solute carrier family 15 (oligopeptide transporter), member 3
ENSG00000140105.17	-0.669767	7.66007	9.938e-11	5.96427e-09	34.72	35.35	37.02	53.47	57.31	55.24	WARS	chr14	protein_coding	tryptophanyl-tRNA synthetase
ENSG00000104140.6	-0.704548	3.75345	1.40856e-09	7.43824e-08	6.19	4.1	7.14	10.28	8.84	8.61	RHOV	chr15	protein_coding	ras homolog family member V
ENSG00000179299.16	-1.53736	-2.39813	0.00928981	0.0784359	0.01	0.03	0.01	0.05	0.05	0.05	NSUN7	chr4	protein_coding	NOP2/Sun domain family, member 7
ENSG00000170482.16	-1.34439	2.3683	8.22598e-22	1.14356e-19	1.36	0.7	1.57	3.54	3.21	2.25	SLC23A1	chr5	protein_coding	solute carrier family 23 (ascorbic acid transporter), member 1
ENSG00000101439.8	-0.627723	8.15862	1.19253e-09	6.34226e-08	59.68	55.19	62.05	83.96	91.4	90.97	CST3	chr20	protein_coding	cystatin C
ENSG00000197324.8	-0.59901	7.77097	6.89341e-09	3.34476e-07	23.84	23.62	25.99	35.04	36.53	36.82	LRP10	chr14	protein_coding	low density lipoprotein receptor-related protein 10
ENSG00000270392.2	1.08079	-1.11007	0.0015237	0.0191032	0.36	0.29	0.23	0.21	0.1	0.1	PFN1P2	chr1	transcribed_processed_pseudogene	profilin 1 pseudogene 2
ENSG00000178685.13	-1.53793	6.19087	1.03586e-46	3.73022e-44	8.56	8.37	13.03	25.62	28.9	30.15	PARP10	chr8	protein_coding	poly (ADP-ribose) polymerase family, member 10
ENSG00000136305.11	-1.10663	-0.0570505	5.27868e-06	0.000148844	0.26	0.1	0.22	0.52	0.53	0.18	CIDEB	chr14	protein_coding	cell death-inducing DFFA-like effector b
ENSG00000236901.4	1.46561	-1.10993	2.30328e-05	0.00055276	0.1	0.12	0.08	0.04	0.02	0.05	MIR600HG	chr9	sense_intronic	MIR600 host gene
ENSG00000108984.13	-0.706191	4.03168	5.80936e-10	3.17433e-08	3.71	3.4	4.42	6.42	6.43	5.5	MAP2K6	chr17	protein_coding	mitogen-activated protein kinase kinase 6
ENSG00000188051.6	-0.946317	-0.767589	0.00198913	0.0236046	0.2	0.2	0.15	0.34	0.3	0.38	TMEM221	chr19	protein_coding	transmembrane protein 221
ENSG00000202415.1	1.6102	-2.16945	0.00476563	0.0473011	1.04	0.85	0.44	0.33	0.16	0.24	RN7SKP269	chr1	misc_RNA	RNA, 7SK small nuclear pseudogene 269
ENSG00000271452.1	2.05558	-2.50624	0.00289864	0.0320848	0.12	0.41	0.73	0.11	0.11	0.05	RP11-342K6.2	chr2	sense_intronic	--
ENSG00000197776.7	1.61618	-2.053	0.00188141	0.0225928	0.12	0.02	0.17	0.05	0.03	0.02	KLHDC1	chr14	protein_coding	kelch domain containing 1
ENSG00000149131.15	-2.84191	3.26109	1.25204e-94	1.24741e-91	0.75	0.64	1.33	6.34	6.26	6.38	SERPING1	chr11	protein_coding	serpin peptidase inhibitor, clade G (C1 inhibitor), member 1
ENSG00000168447.10	-2.23459	-2.14095	9.75144e-05	0.00193662	0.01	0	0.05	0.12	0.08	0.09	SCNN1B	chr16	protein_coding	sodium channel, non voltage gated 1 beta subunit
ENSG00000104870.12	-0.637818	4.59707	7.38002e-09	3.54063e-07	9.41	8.06	9.59	13.62	13.76	13.68	FCGRT	chr19	protein_coding	Fc fragment of IgG, receptor, transporter, alpha
ENSG00000186329.9	1.34728	-1.754	0.00299188	0.0329372	0.18	0.16	0.21	0.08	0.08	0.04	TMEM212	chr3	protein_coding	transmembrane protein 212
ENSG00000132906.17	-0.607509	4.02844	9.22135e-08	3.77041e-06	2.46	2.98	2.7	3.87	4.15	4.07	CASP9	chr1	protein_coding	caspase 9, apoptosis-related cysteine peptidase
ENSG00000102001.12	-4.61239	-3.36302	0.00408448	0.0421259	0	0	0	0	0.02	0.02	CACNA1F	chrX	protein_coding	calcium channel, voltage-dependent, L type, alpha 1F subunit
ENSG00000239713.7	-3.48007	-1.23362	1.25572e-14	1.12372e-12	0.03	0.01	0.05	0.37	0.29	0.37	APOBEC3G	chr22	protein_coding	apolipoprotein B mRNA editing enzyme, catalytic polypeptide-like 3G
ENSG00000188933.14	0.644201	2.09287	5.58972e-06	0.000156727	0.99	1.09	1.19	0.99	0.62	0.44	USP32P1	chr17	transcribed_unprocessed_pseudogene	ubiquitin specific peptidase 32 pseudogene 1
ENSG00000233671.1	1.44746	0.615235	6.61489e-13	5.10885e-11	1.46	1.71	1.44	0.44	0.57	0.63	AC083899.1	chr2	processed_pseudogene	--
ENSG00000120341.18	-1.39891	2.66232	1.84718e-25	3.1017e-23	0.58	0.59	0.79	1.72	1.79	1.54	SEC16B	chr1	protein_coding	SEC16 homolog B (S. cerevisiae)
ENSG00000268902.2	-3.12597	-1.33081	1.21641e-11	8.07939e-10	0.03	0	0.21	0.48	0.92	0.68	CSAG2	chrX	transcribed_unprocessed_pseudogene	CSAG family, member 2
ENSG00000056558.10	-1.88329	3.25848	6.67173e-49	2.73166e-46	0.5	0.72	0.6	2.08	1.99	2.48	TRAF1	chr9	protein_coding	TNF receptor-associated factor 1
ENSG00000111879.18	3.22613	-3.11078	0.00366111	0.0385136	0.02	0.02	0.02	0	0	0	FAM184A	chr6	protein_coding	family with sequence similarity 184, member A
ENSG00000273014.1	0.880293	1.34424	9.7548e-08	3.96682e-06	6.36	6.52	7.08	5.03	3.6	1.99	RP11-225B17.2	chr7	lincRNA	--
ENSG00000004799.7	-0.759676	6.26058	5.282e-13	4.12203e-11	15.45	12.7	18.16	31.84	25.72	19.23	PDK4	chr7	protein_coding	pyruvate dehydrogenase kinase, isozyme 4
ENSG00000183169.6	-2.15667	-2.58561	0.00179343	0.0217108	0	0.02	0.02	0.1	0.04	0.07	POM121L1P	chr22	transcribed_unprocessed_pseudogene	POM121 transmembrane nucleoporin-like 1, pseudogene
ENSG00000184979.9	-1.02334	7.0584	1.40157e-22	2.0535e-20	36.11	33.55	50.49	79.37	77.9	80.8	USP18	chr22	protein_coding	ubiquitin specific peptidase 18
ENSG00000272010.1	1.32441	-1.48736	0.000688211	0.0100784	0.75	0.74	0.55	0.3	0.29	0.2	CTD-3025N20.3	chr8	lincRNA	--
ENSG00000110852.4	-0.90659	2.24628	8.86339e-11	5.33034e-09	1.28	1.59	1.71	2.94	2.94	2.52	CLEC2B	chr12	protein_coding	C-type lectin domain family 2, member B
ENSG00000237857.2	0.650596	0.360621	0.00164121	0.0202285	0.92	1.02	1.19	0.58	0.8	0.56	RP11-435O5.2	chr9	lincRNA	--
ENSG00000114127.10	-0.597868	2.82111	2.78231e-06	8.42343e-05	0.42	0.49	0.6	0.91	0.73	0.58	XRN1	chr3	protein_coding	5'-3' exoribonuclease 1
ENSG00000240695.1	3.22607	-3.11081	0.00366111	0.0385136	0.08	0.22	0.16	0.04	0	0	RP11-102M11.1	chr3	processed_pseudogene	--
ENSG00000185885.15	-2.77174	8.14402	2.27343e-140	1.35901e-136	51.4	44.2	106.39	466.22	452.58	427.46	IFITM1	chr11	protein_coding	interferon induced transmembrane protein 1
ENSG00000115009.11	-1.56723	3.77442	4.4478e-39	1.20855e-36	7.3	7.6	8.85	26.9	22.17	19.66	CCL20	chr2	protein_coding	chemokine (C-C motif) ligand 20
ENSG00000134986.13	-0.934714	3.97081	3.93146e-16	3.91692e-14	1.98	1.96	2.41	4.11	4.21	3.52	NREP	chr5	protein_coding	neuronal regeneration related protein
ENSG00000153234.13	-1.31654	2.00867	7.7532e-19	9.23248e-17	0.5	0.43	0.82	1.35	1.54	1.35	NR4A2	chr2	protein_coding	nuclear receptor subfamily 4, group A, member 2
ENSG00000231683.6	-0.731765	1.18463	2.014e-05	0.000490199	0.48	0.37	0.48	0.72	0.81	0.61	RP1-27K12.2	chr6	lincRNA	--
ENSG00000196951.10	0.618836	1.03228	0.00037638	0.00612725	1.37	0.82	0.93	0.71	0.79	0.48	SCOC-AS1	chr4	antisense	SCOC antisense RNA 1
ENSG00000127129.9	-1.79388	-0.0923964	3.97748e-12	2.79725e-10	0.27	0.13	0.52	0.77	1.19	1.14	EDN2	chr1	protein_coding	endothelin 2
ENSG00000204616.10	-1.43687	4.93657	1.09644e-38	2.92602e-36	7.67	6.62	9.19	22.5	21.01	18.56	TRIM31	chr6	protein_coding	tripartite motif containing 31
ENSG00000179046.8	0.62599	4.44344	1.70336e-08	7.73736e-07	16.89	15.82	14.12	10.15	10.54	8.93	TRIML2	chr4	protein_coding	tripartite motif family-like 2
ENSG00000225431.1	-2.89132	-2.75545	0.000466963	0.00733038	0.02	0	0.02	0.09	0.06	0.11	AP001626.1	chr21	lincRNA	--
ENSG00000275708.1	-2.99233	-3.17029	0.00671615	0.0617468	0.15	0	0	0.29	0.28	0.99	MIR3648-1	chr21	miRNA	microRNA 3648-1
ENSG00000065361.14	-1.09954	3.54596	5.26876e-20	6.62653e-18	1.12	0.67	1.11	2.74	2.07	1.27	ERBB3	chr12	protein_coding	erb-b2 receptor tyrosine kinase 3
ENSG00000126259.19	-0.665304	1.23793	7.23331e-05	0.00148793	0.45	0.44	0.69	0.81	0.7	0.93	KIRREL2	chr19	protein_coding	kin of IRRE like 2 (Drosophila)
ENSG00000157782.9	-1.56746	-0.627874	1.65893e-07	6.46465e-06	0.08	0.07	0.1	0.27	0.27	0.23	CABP1	chr12	protein_coding	calcium binding protein 1
ENSG00000271503.5	-3.8112	7.5153	1.14115e-238	1.13692e-234	9.61	14.11	25.84	207.13	224.99	244.5	CCL5	chr17	protein_coding	chemokine (C-C motif) ligand 5
ENSG00000116032.5	-0.959146	0.201718	1.46076e-05	0.000369553	0.19	0.3	0.16	0.31	0.49	0.43	GRIN3B	chr19	protein_coding	glutamate receptor, ionotropic, N-methyl-D-aspartate 3B
ENSG00000105642.15	-0.730192	0.956326	5.62753e-05	0.00120144	0.39	0.39	0.34	0.48	0.68	0.67	KCNN1	chr19	protein_coding	potassium channel, calcium activated intermediate/small conductance subfamily N alpha, member 1
ENSG00000106302.9	-2.01761	-0.874744	3.70832e-09	1.84116e-07	0.01	0.09	0.13	0.39	0.31	0.21	HYAL4	chr7	protein_coding	hyaluronoglucosaminidase 4
ENSG00000133083.14	0.74623	-0.574506	0.00801201	0.0705603	0.06	0.1	0.07	0.06	0.04	0.03	DCLK1	chr13	protein_coding	doublecortin-like kinase 1
ENSG00000013374.15	-0.843929	6.03891	1.49032e-15	1.43229e-13	13.75	12.79	15.93	27.18	25.53	21.75	NUB1	chr7	protein_coding	negative regulator of ubiquitin-like proteins 1
ENSG00000214691.7	-1.99963	0.385149	1.25831e-18	1.46913e-16	0.21	0.22	0.36	0.82	1.12	1.16	AC104654.1	chr2	lincRNA	--
ENSG00000134326.11	-1.62689	6.23787	7.09493e-52	3.11853e-49	7.43	7.19	12.8	31.16	26.97	24.59	CMPK2	chr2	protein_coding	cytidine monophosphate (UMP-CMP) kinase 2, mitochondrial
ENSG00000002549.12	-0.919335	7.42534	1.05632e-18	1.23813e-16	48.17	46.71	61.51	109.79	96.2	83.07	LAP3	chr4	protein_coding	leucine aminopeptidase 3
ENSG00000161958.10	-1.01534	0.308583	2.58377e-06	7.86419e-05	0.16	0.14	0.16	0.26	0.33	0.32	FGF11	chr17	protein_coding	fibroblast growth factor 11
ENSG00000118526.6	-0.799904	-0.576172	0.00452221	0.0454639	0.09	0.08	0.11	0.12	0.19	0.18	TCF21	chr6	protein_coding	transcription factor 21
ENSG00000215252.11	0.589947	2.92133	2.95592e-06	8.87936e-05	1.67	2	2.07	1.38	1.1	1.24	GOLGA8B	chr15	protein_coding	golgin A8 family, member B
ENSG00000276462.1	-5.86684	-2.66825	6.32036e-07	2.19662e-05	0	0	0	0.08	0.04	0.08	BX255923.3	chr9	lincRNA	--
ENSG00000181908.5	-1.32218	-1.94833	0.00669463	0.0617468	0.06	0.03	0.05	0.16	0.11	0.09	AP003774.4	chr11	lincRNA	--
ENSG00000132554.19	-1.66828	0.954227	1.34153e-18	1.54815e-16	0.18	0.14	0.24	0.55	0.59	0.6	RGS22	chr8	protein_coding	regulator of G-protein signaling 22
ENSG00000274528.1	0.630272	-0.0879373	0.00764124	0.0681758	1.05	1.18	1.41	0.67	0.73	0.88	CTD-2650P22.2	chr15	sense_intronic	--
ENSG00000123358.19	-1.04313	5.23025	5.98111e-22	8.47249e-20	5.72	5.13	6.74	10.81	11.94	12.54	NR4A1	chr12	protein_coding	nuclear receptor subfamily 4, group A, member 1
ENSG00000089199.9	-0.788571	3.23113	1.23031e-10	7.25299e-09	2.67	2.35	2.79	5.14	4.48	3.56	CHGB	chr20	protein_coding	chromogranin B
ENSG00000278464.1	-3.11336	-3.1118	0.00366111	0.0385136	0	0.05	0	0.15	0.37	0.05	RP11-96A15.1	chr18	lincRNA	--
ENSG00000161082.12	-0.80579	-0.0985051	0.000994053	0.0135978	0.09	0.13	0.17	0.25	0.24	0.18	CELF5	chr19	protein_coding	CUGBP, Elav-like family member 5
ENSG00000179766.17	-0.858411	-0.149636	0.000587951	0.00884856	0.17	0.06	0.05	0.22	0.18	0.1	ATP8B5P	chr9	transcribed_unprocessed_pseudogene	ATPase, class I, type 8B, member 5, pseudogene
ENSG00000197142.10	-1.89188	2.34901	8.16508e-39	2.19861e-36	0.55	0.46	0.59	1.95	2.15	1.68	ACSL5	chr10	protein_coding	acyl-CoA synthetase long-chain family member 5
ENSG00000204186.7	0.621023	0.668742	0.00138853	0.017812	0.16	0.19	0.18	0.16	0.1	0.07	ZDBF2	chr2	protein_coding	zinc finger, DBF-type containing 2
ENSG00000182580.2	-0.694311	-0.248068	0.00635997	0.059293	0.16	0.11	0.14	0.24	0.18	0.23	EPHB3	chr3	protein_coding	EPH receptor B3
ENSG00000269821.1	0.734088	1.60193	2.31052e-06	7.09754e-05	0.04	0.04	0.04	0.03	0.02	0.02	KCNQ1OT1	chr11	antisense	KCNQ1 opposite strand/antisense transcript 1 (non-protein coding)
ENSG00000255135.3	0.845497	2.25595	1.14097e-09	6.07887e-08	7.17	8.3	8.56	4.26	4.47	4.29	RP11-111M22.3	chr11	lincRNA	--
ENSG00000079385.21	-2.59067	4.63682	3.9343e-104	5.87962e-101	1.66	1.21	2.67	11.59	11.05	9.94	CEACAM1	chr19	protein_coding	carcinoembryonic antigen-related cell adhesion molecule 1 (biliary glycoprotein)
ENSG00000114279.13	1.20223	-1.32777	0.00108234	0.0145585	0.08	0.07	0.07	0.03	0.05	0.02	FGF12	chr3	protein_coding	fibroblast growth factor 12
ENSG00000228318.3	-1.46935	-1.45256	0.00033886	0.00561429	0.1	0.12	0.2	0.35	0.55	0.25	AP001610.5	chr21	antisense	--
ENSG00000110172.11	0.638485	5.50662	2.17013e-09	1.1164e-07	7.69	8.79	7.31	6.83	4.48	3.65	CHORDC1	chr11	protein_coding	cysteine and histidine-rich domain (CHORD) containing 1
ENSG00000179111.8	-0.870949	3.08421	2.79479e-12	2.0032e-10	3.36	3.43	3.55	5.82	6.11	6.5	HES7	chr17	protein_coding	hes family bHLH transcription factor 7
ENSG00000131094.3	-1.73848	5.54001	5.61368e-57	2.79646e-54	14.25	14.69	19.22	46.43	52.89	57.03	C1QL1	chr17	protein_coding	complement component 1, q subcomponent-like 1
ENSG00000243716.10	0.684468	1.75963	5.45708e-06	0.00015325	0.81	0.99	0.83	0.6	0.5	0.49	NPIPB5	chr16	protein_coding	nuclear pore complex interacting protein family, member B5
ENSG00000243753.5	-1.15965	-1.17142	0.00113116	0.0150397	0.12	0.1	0.15	0.32	0.37	0.14	HLA-L	chr6	transcribed_unprocessed_pseudogene	major histocompatibility complex, class I, L (pseudogene)
ENSG00000188761.11	-0.698337	0.437702	0.000776959	0.0111113	1.14	0.77	0.73	1.24	1.57	1.38	BCL2L15	chr1	protein_coding	BCL2-like 15
ENSG00000200795.1	-1.09025	0.101016	2.22934e-06	6.86229e-05	6.84	3.25	3.21	7.68	8.28	11.69	RNU4-1	chr12	snRNA	RNA, U4 small nuclear 1
ENSG00000116299.16	0.595072	0.754592	0.00154395	0.0192681	0.4	0.64	0.63	0.37	0.35	0.35	KIAA1324	chr1	protein_coding	KIAA1324
ENSG00000124107.5	-0.815574	4.921	7.6757e-14	6.49912e-12	42.81	25.85	38.25	70.16	59.42	54.41	SLPI	chr20	protein_coding	secretory leukocyte peptidase inhibitor
ENSG00000197721.16	-3.74299	-0.251614	1.83536e-28	3.40727e-26	0.06	0.02	0.1	0.59	0.78	0.91	CR1L	chr1	protein_coding	complement component (3b/4b) receptor 1-like
ENSG00000214215.3	-1.85849	-2.54601	0.00465381	0.0464588	0.02	0	0.04	0.1	0.07	0.04	C12orf74	chr12	protein_coding	chromosome 12 open reading frame 74
ENSG00000139679.15	-1.47685	0.624676	5.09261e-13	3.98463e-11	0.2	0.19	0.35	0.78	0.7	0.55	LPAR6	chr13	protein_coding	lysophosphatidic acid receptor 6
ENSG00000196776.14	-0.690008	5.81097	7.60013e-11	4.60771e-09	7.57	8.23	8.82	13.23	13.32	12.18	CD47	chr3	protein_coding	CD47 molecule
ENSG00000128284.19	-3.07022	3.45045	1.66894e-110	2.93428e-107	0.35	0.44	0.95	4.39	5.08	4.73	APOL3	chr22	protein_coding	apolipoprotein L, 3
ENSG00000155324.9	-0.697407	0.382187	0.00081233	0.0115288	0.34	0.24	0.15	0.51	0.36	0.29	GRAMD3	chr5	protein_coding	GRAM domain containing 3
ENSG00000067715.13	-0.64782	1.58362	3.36317e-05	0.00077235	0.43	0.39	0.42	0.72	0.69	0.5	SYT1	chr12	protein_coding	synaptotagmin I
ENSG00000282246.1	0.977376	-0.386644	0.000262267	0.00451809	0.78	0.72	0.8	0.35	0.34	0.44	RP11-295P9.13	chr10	protein_coding	--
ENSG00000117475.13	-0.706195	4.25253	3.2979e-10	1.86687e-08	3.27	3.76	4.04	7.98	5.69	4.02	BLZF1	chr1	protein_coding	basic leucine zipper nuclear factor 1
ENSG00000182179.10	-2.59141	4.07701	2.57813e-96	2.65716e-93	0.83	1.05	2.35	7.7	8.2	8.83	UBA7	chr3	protein_coding	ubiquitin-like modifier activating enzyme 7
ENSG00000213160.9	0.731704	3.19212	2.2301e-09	1.14136e-07	2.36	2.76	2.38	1.83	1.44	1.15	KLHL23	chr2	protein_coding	kelch-like family member 23
ENSG00000277512.1	1.35056	-1.60463	0.00158314	0.0196751	5.28	7.02	3.49	2.17	1.39	2.43	SNORD65	chr17	snoRNA	small nucleolar RNA, C/D box 65
ENSG00000253741.1	-0.67858	0.0822167	0.00295626	0.0326292	0.1	0.15	0.14	0.19	0.24	0.18	CTD-2292P10.4	chr8	antisense	--
ENSG00000141527.16	-2.55669	-1.75651	2.67611e-07	9.97336e-06	0.01	0.02	0.01	0.08	0.09	0.07	CARD14	chr17	protein_coding	caspase recruitment domain family, member 14
ENSG00000227671.4	0.587834	0.376851	0.00425381	0.043501	0.82	0.74	0.99	0.49	0.47	0.68	RP11-488L18.4	chr1	transcribed_unprocessed_pseudogene	--
ENSG00000054938.15	-1.28062	-0.331058	1.15372e-06	3.80195e-05	0.24	0.22	0.17	0.33	0.56	0.59	CHRDL2	chr11	protein_coding	chordin-like 2
ENSG00000263096.1	-0.80545	-0.363755	0.00251821	0.0285968	0.32	0.22	0.34	0.42	0.54	0.52	RP11-515O17.2	chr17	antisense	--
ENSG00000112343.10	-0.988073	5.3169	5.39428e-20	6.74601e-18	2.49	2.49	3.26	5.53	5.47	4.97	TRIM38	chr6	protein_coding	tripartite motif containing 38
ENSG00000171560.14	-1.2092	7.09841	1.14893e-30	2.33608e-28	21.82	13.88	25.11	55.12	46.07	36.51	FGA	chr4	protein_coding	fibrinogen alpha chain
ENSG00000170542.5	-0.692859	5.66467	7.36407e-11	4.48278e-09	8.84	9	9.54	14.48	15.11	13.58	SERPINB9	chr6	protein_coding	serpin peptidase inhibitor, clade B (ovalbumin), member 9
ENSG00000140807.5	-0.60263	2.01716	2.84759e-05	0.000665455	0.38	0.27	0.42	0.65	0.53	0.41	NKD1	chr16	protein_coding	naked cuticle homolog 1 (Drosophila)
ENSG00000117305.14	-0.61767	3.77853	9.86953e-08	4.00802e-06	6.16	6.02	7.43	10.18	9.93	9.25	HMGCL	chr1	protein_coding	3-hydroxymethyl-3-methylglutaryl-CoA lyase
ENSG00000173805.15	-0.915761	0.446627	8.30293e-06	0.000221775	0.16	0.15	0.13	0.29	0.29	0.24	HAP1	chr17	protein_coding	huntingtin-associated protein 1
ENSG00000101017.13	-1.42712	3.34417	1.07349e-30	2.2128e-28	2.66	2.5	3.27	6.99	7.39	7.68	CD40	chr20	protein_coding	CD40 molecule, TNF receptor superfamily member 5
ENSG00000160183.13	-3.06913	-2.0015	1.93372e-07	7.45767e-06	0.01	0.01	0.01	0.14	0.09	0.03	TMPRSS3	chr21	protein_coding	transmembrane protease, serine 3
ENSG00000138798.11	-1.23398	-1.02866	0.000251611	0.00436724	0.06	0.06	0.03	0.13	0.11	0.11	EGF	chr4	protein_coding	epidermal growth factor
ENSG00000275183.1	-0.585199	2.79478	4.82656e-06	0.000137654	2.88	2.38	3.1	3.76	4.73	3.73	LENG9	chr19	protein_coding	leukocyte receptor cluster (LRC) member 9
ENSG00000227017.1	-3.22535	-3.05506	0.00198795	0.0236046	0	0	0.04	0	0.3	0.19	AC007036.6	chr7	lincRNA	--
ENSG00000042980.12	-2.10937	-1.54668	2.78724e-06	8.42343e-05	0.01	0	0.03	0.06	0.06	0.05	ADAM28	chr8	protein_coding	ADAM metallopeptidase domain 28
ENSG00000100346.17	-1.5354	0.280469	9.27716e-12	6.21715e-10	0.05	0.05	0.06	0.18	0.14	0.13	CACNA1I	chr22	protein_coding	calcium channel, voltage-dependent, T type, alpha 1I subunit
ENSG00000256618.2	1.14761	-1.41454	0.00237264	0.0272858	0.27	0.33	0.24	0.17	0.15	0.05	MTRNR2L1	chr17	protein_coding	MT-RNR2-like 1
ENSG00000263934.4	-1.10444	3.10076	1.3235e-18	1.53923e-16	9.74	5.25	7.49	14.43	14.12	18.5	SNORD3A	chr17	snoRNA	small nucleolar RNA, C/D box 3A
ENSG00000185339.8	-1.59179	4.92742	1.16384e-46	4.14118e-44	5.08	4.79	6.83	16	17.23	15.84	TCN2	chr22	protein_coding	transcobalamin II
ENSG00000198930.12	-2.13614	-0.723731	6.39354e-11	3.94828e-09	0.08	0.12	0.34	0.63	0.77	0.91	CSAG1	chrX	protein_coding	chondrosarcoma associated gene 1
ENSG00000139835.13	-0.70711	1.17054	3.98139e-05	0.000888058	0.86	0.49	0.81	1.22	1.24	0.97	GRTP1	chr13	protein_coding	growth hormone regulated TBC protein 1
ENSG00000137642.12	0.759979	2.11627	7.4743e-08	3.09846e-06	0.42	0.48	0.43	0.27	0.25	0.25	SORL1	chr11	protein_coding	sortilin-related receptor, L(DLR class) A repeats containing
ENSG00000068489.12	0.610772	4.09542	6.91989e-08	2.87661e-06	7.16	8.58	6.46	4.81	4.69	4.67	PRR11	chr17	protein_coding	proline rich 11
ENSG00000103269.13	-0.968904	-0.935888	0.00247769	0.0281902	0.18	0.17	0.18	0.32	0.32	0.37	RHBDL1	chr16	protein_coding	rhomboid, veinlet-like 1 (Drosophila)
ENSG00000255121.2	0.829488	-0.378419	0.00139711	0.0179144	0.73	0.62	0.63	0.47	0.34	0.28	RP11-110I1.12	chr11	lincRNA	--
ENSG00000258561.1	-1.48128	-2.17035	0.00476563	0.0473011	0.07	0.02	0.07	0.13	0.1	0.21	RP11-72M17.1	chr14	lincRNA	--
ENSG00000101323.4	-0.827527	-0.232278	0.00106266	0.0143718	0.4	0.11	0.43	0.74	0.54	0.34	HAO1	chr20	protein_coding	hydroxyacid oxidase (glycolate oxidase) 1
ENSG00000141485.15	-2.63425	-2.89752	0.00259068	0.0292531	0	0.01	0.01	0.05	0.03	0.03	SLC13A5	chr17	protein_coding	solute carrier family 13 (sodium-dependent citrate transporter), member 5
ENSG00000141448.8	-0.741247	2.14368	1.65308e-07	6.45026e-06	0.87	0.63	0.91	1.43	1.37	1.13	GATA6	chr18	protein_coding	GATA binding protein 6
ENSG00000039068.18	-1.62825	5.23265	1.23872e-49	5.21886e-47	2.98	2.8	4.95	10.63	11.22	10.49	CDH1	chr16	protein_coding	cadherin 1, type 1, E-cadherin (epithelial)
ENSG00000204588.5	0.594199	2.46159	8.41029e-06	0.000224299	2.43	2.82	2.6	1.64	1.76	1.68	LINC01123	chr2	lincRNA	long intergenic non-protein coding RNA 1123
ENSG00000005981.12	-0.878485	1.53593	3.93858e-08	1.67932e-06	0.53	0.27	0.54	0.96	0.94	0.52	ASB4	chr7	protein_coding	ankyrin repeat and SOCS box containing 4
ENSG00000187510.7	-2.95217	-2.0834	1.02062e-06	3.40461e-05	0.01	0	0.02	0.09	0.04	0.09	PLEKHG7	chr12	protein_coding	pleckstrin homology domain containing, family G (with RhoGef domain) member 7
ENSG00000234460.1	0.795458	0.903296	1.49405e-05	0.000377159	5.79	4.48	4.64	2.51	2.19	3.65	XXyac-YM21GA2.4	chr9	lincRNA	--
ENSG00000129988.5	-2.27237	2.14338	1.63472e-48	6.51468e-46	1.08	0.25	0.88	4.63	3.73	2.09	LBP	chr20	protein_coding	lipopolysaccharide binding protein
ENSG00000102871.15	-0.746093	5.33409	3.73527e-12	2.63933e-10	11.69	11.57	12.18	17.51	19.82	20.53	TRADD	chr16	protein_coding	TNFRSF1A-associated via death domain
ENSG00000276445.1	1.0819	-1.19969	0.00205287	0.0241473	0.8	1.02	0.78	0.41	0.52	0.26	LLNLR-268E12.1	chr19	lincRNA	--
ENSG00000249746.1	-1.52147	-0.745378	1.06994e-06	3.55328e-05	0.59	0.08	0.56	1.5	1.21	0.78	RP11-254I22.3	chr5	lincRNA	--
ENSG00000156113.20	0.84365	2.64765	1.20318e-10	7.12118e-09	0.92	1.08	0.72	0.46	0.48	0.54	KCNMA1	chr10	protein_coding	potassium channel, calcium activated large conductance subfamily M alpha, member 1
ENSG00000267288.2	-1.0787	1.11444	8.82307e-10	4.76808e-08	0.75	0.47	0.69	1.36	1.48	1.1	RP13-890H12.2	chr17	antisense	--
ENSG00000184678.9	-0.953439	2.98899	4.18794e-14	3.59694e-12	2.54	2.19	2.18	4.37	4.21	4.45	HIST2H2BE	chr1	protein_coding	histone cluster 2, H2be
ENSG00000259684.1	-0.941201	-0.23258	0.00021626	0.0038475	0.68	0.71	1.21	1.61	1.42	1.84	RP11-120K9.2	chr15	antisense	--
ENSG00000110492.15	-2.21141	4.65828	5.726e-83	4.62553e-80	4.06	3.93	7.23	22.96	23.22	22.46	MDK	chr11	protein_coding	midkine (neurite growth-promoting factor 2)
ENSG00000123609.10	-1.19987	6.03579	2.00235e-29	3.86118e-27	19.67	21.55	30.11	56.93	53.71	49.27	NMI	chr2	protein_coding	N-myc (and STAT) interactor
ENSG00000204642.13	-2.14515	5.90021	7.05875e-85	6.02797e-82	7.83	9.04	15.41	45.97	45.85	47.22	HLA-F	chr6	protein_coding	major histocompatibility complex, class I, F
ENSG00000274598.1	3.87337	-2.75431	4.83432e-05	0.00105162	0.37	0.24	0.17	0.04	0	0	RP11-423G4.10	chr12	sense_intronic	--
ENSG00000186994.11	-0.674198	1.27868	5.5209e-05	0.00118036	0.55	0.46	0.46	0.73	0.73	0.84	KANK3	chr19	protein_coding	KN motif and ankyrin repeat domains 3
ENSG00000167107.12	-0.788333	3.42246	5.25234e-11	3.29114e-09	3.36	2.99	3.49	5.37	5.95	5.25	ACSF2	chr17	protein_coding	acyl-CoA synthetase family member 2
ENSG00000259674.1	-0.77956	2.13761	3.63043e-08	1.56354e-06	3.33	3.5	4.77	6.35	6.45	6.58	RP11-356M20.1	chr15	processed_pseudogene	--
ENSG00000176046.8	-1.11845	3.55585	9.87135e-21	1.2828e-18	1.34	1.26	1.28	2.5	2.98	2.7	NUPR1	chr16	protein_coding	nuclear protein, transcriptional regulator, 1
ENSG00000118503.14	-0.765349	3.93485	2.48678e-11	1.60188e-09	2.02	2.6	2.32	4.22	3.75	3.53	TNFAIP3	chr6	protein_coding	tumor necrosis factor, alpha-induced protein 3
ENSG00000246548.3	-4.44983	-3.43336	0.00808871	0.0706704	0	0	0	0.03	0.02	0.03	RP11-7F17.5	chr14	lincRNA	--
ENSG00000142149.8	0.764021	-0.0115195	0.00104028	0.0141139	0.14	0.14	0.19	0.11	0.1	0.05	HUNK	chr21	protein_coding	hormonally up-regulated Neu-associated kinase
ENSG00000168517.10	-0.661439	4.41698	2.85747e-09	1.43783e-07	9.86	8.17	10.82	13.65	15.27	15.52	HEXIM2	chr17	protein_coding	hexamethylene bis-acetamide inducible 2
ENSG00000204540.10	-0.90686	1.55932	1.0966e-08	5.10533e-07	1.22	1.78	2.76	3.12	3.38	4	PSORS1C1	chr6	protein_coding	psoriasis susceptibility 1 candidate 1
ENSG00000230176.2	-0.635307	2.6155	1.24588e-06	4.07865e-05	7.87	5.19	6.78	9.73	10.48	9.82	LINC01433	chr20	antisense	long intergenic non-protein coding RNA 1433
ENSG00000163515.6	-6.15726	-2.47073	2.28058e-08	1.00984e-06	0	0	0	0.27	0.45	0.3	RETNLB	chr3	protein_coding	resistin like beta
ENSG00000213088.9	-4.77329	-0.96367	1.88692e-22	2.73778e-20	0	0.01	0.03	0.51	0.3	0.36	ACKR1	chr1	protein_coding	atypical chemokine receptor 1 (Duffy blood group)
ENSG00000147573.16	-0.863742	-0.922895	0.00648624	0.0601698	0.06	0.12	0.15	0.17	0.17	0.24	TRIM55	chr8	protein_coding	tripartite motif containing 55
ENSG00000130813.17	-0.84965	6.62294	5.28643e-16	5.21472e-14	25.7	24.68	32.76	48.17	48.25	49.6	C19orf66	chr19	protein_coding	chromosome 19 open reading frame 66
ENSG00000176723.9	-0.949094	-1.02807	0.0043458	0.0441358	0.04	0.08	0.07	0.14	0.08	0.13	ZNF843	chr16	protein_coding	zinc finger protein 843
ENSG00000113504.19	-0.601699	5.25335	2.15943e-08	9.64199e-07	5.37	5.43	5.88	8.27	8.03	8.37	SLC12A7	chr5	protein_coding	solute carrier family 12 (potassium/chloride transporter), member 7
ENSG00000197635.9	-1.67291	0.623808	4.60752e-16	4.56007e-14	0.17	0.16	0.18	0.56	0.56	0.48	DPP4	chr2	protein_coding	dipeptidyl-peptidase 4
ENSG00000261371.5	-1.86564	-1.71172	3.92768e-05	0.00087801	0.01	0.01	0.02	0.04	0.06	0.06	PECAM1	chr17	protein_coding	platelet/endothelial cell adhesion molecule 1
ENSG00000105467.8	-0.808353	-0.178256	0.00109644	0.0146699	0.62	0.18	0.66	0.79	0.89	0.8	SYNGR4	chr19	protein_coding	synaptogyrin 4
ENSG00000100298.15	-2.24393	-1.45299	1.09029e-07	4.37008e-06	0.1	0.09	0.07	0.35	0.51	0.4	APOBEC3H	chr22	protein_coding	apolipoprotein B mRNA editing enzyme, catalytic polypeptide-like 3H
ENSG00000188404.8	-2.21487	0.842944	4.40575e-27	7.7008e-25	0.19	0.12	0.42	1.15	1.07	1.08	SELL	chr1	protein_coding	selectin L
ENSG00000221949.5	0.678581	0.269496	0.00184654	0.0222277	0.95	0.6	0.58	0.48	0.38	0.44	LINC01465	chr12	lincRNA	long intergenic non-protein coding RNA 1465
ENSG00000214900.8	-0.777433	2.45613	7.84693e-09	3.74062e-07	0.53	0.66	0.76	0.98	1.07	1.21	LINC01588	chr14	lincRNA	long intergenic non-protein coding RNA 1588
ENSG00000109511.10	0.865449	1.38524	1.24414e-07	4.93185e-06	2.53	2.3	1.98	1.15	1.45	1.04	ANXA10	chr4	protein_coding	annexin A10
ENSG00000273049.1	1.17802	-1.39659	0.00172553	0.0211024	0.6	0.59	0.51	0.2	0.33	0.2	RP11-834C11.12	chr12	protein_coding	--
ENSG00000269388.1	-0.62361	0.787256	0.00097708	0.0134209	1.1	0.57	0.92	0.97	1.21	1.71	AC018755.16	chr19	transcribed_processed_pseudogene	--
ENSG00000101076.16	-0.733908	4.951	1.57396e-11	1.02716e-09	3.49	2.13	3.74	5.82	5.17	4.23	HNF4A	chr20	protein_coding	hepatocyte nuclear factor 4, alpha
ENSG00000180336.17	0.603021	1.69531	7.44071e-05	0.00152639	0.57	0.55	0.59	0.51	0.34	0.25	C17orf104	chr17	protein_coding	chromosome 17 open reading frame 104
ENSG00000142677.3	-0.957061	3.71813	2.93375e-16	2.96065e-14	2.86	2.6	3.81	6	6.15	5.39	IL22RA1	chr1	protein_coding	interleukin 22 receptor, alpha 1
ENSG00000140519.12	-0.822448	2.87311	9.95742e-11	5.96427e-09	2.32	3.05	2.33	4.32	4.29	4.67	RHCG	chr15	protein_coding	Rh family, C glycoprotein
ENSG00000138646.8	-1.13371	6.13819	1.30904e-26	2.26162e-24	9.61	10.37	15.73	27.19	27.19	22.1	HERC5	chr4	protein_coding	HECT and RLD domain containing E3 ubiquitin protein ligase 5
ENSG00000162729.13	-0.742956	4.99008	7.91361e-12	5.38793e-10	8.97	9.76	10.11	13.75	15.44	17.74	IGSF8	chr1	protein_coding	immunoglobulin superfamily, member 8
ENSG00000108187.15	-0.79907	1.17978	3.35343e-06	9.914e-05	0.57	0.28	0.65	1.11	0.77	0.66	PBLD	chr10	protein_coding	phenazine biosynthesis-like protein domain containing
ENSG00000019582.14	-5.60625	2.60397	1.25195e-163	9.35489e-160	0.08	0.13	0.2	5.5	7.29	7.03	CD74	chr5	protein_coding	CD74 molecule, major histocompatibility complex, class II invariant chain
ENSG00000099330.8	-0.620584	3.04876	6.09599e-07	2.13103e-05	5.3	4.32	5.94	7.67	8	7.64	OCEL1	chr19	protein_coding	occludin/ELL domain containing 1
ENSG00000204815.8	-0.80834	0.804648	1.83267e-05	0.0004527	0.45	0.5	0.63	0.82	0.99	0.89	TTC25	chr17	protein_coding	tetratricopeptide repeat domain 25
ENSG00000166741.7	-0.694564	7.28039	2.29124e-11	1.48231e-09	48.66	39.61	51.6	75.01	73.99	71.86	NNMT	chr11	protein_coding	nicotinamide N-methyltransferase
ENSG00000241690.3	-1.98784	-1.5279	2.78724e-06	8.42343e-05	0.1	0.04	0.03	0.14	0.37	0.19	TMEM239	chr20	protein_coding	transmembrane protein 239
ENSG00000169507.9	-2.9921	-3.17055	0.00671615	0.0617468	0	0.01	0	0.04	0.03	0.01	SLC38A11	chr2	protein_coding	solute carrier family 38, member 11
ENSG00000107159.12	-1.89645	5.80585	1.38462e-67	8.27699e-65	12.98	9.91	19.67	51.41	53.76	49.34	CA9	chr9	protein_coding	carbonic anhydrase IX
ENSG00000115415.18	-0.715557	9.63094	3.57279e-12	2.53651e-10	110.61	104.23	138.53	209.05	191.97	165.91	STAT1	chr2	protein_coding	signal transducer and activator of transcription 1, 91kDa
ENSG00000198959.11	-0.885327	11.0965	8.45699e-18	9.15837e-16	271.61	302.82	309.42	505.69	531.58	552.38	TGM2	chr20	protein_coding	transglutaminase 2
ENSG00000140465.13	0.971581	0.218585	1.05527e-05	0.000275948	0.55	0.52	0.33	0.2	0.19	0.3	CYP1A1	chr15	protein_coding	cytochrome P450, family 1, subfamily A, polypeptide 1
ENSG00000184347.14	0.591454	3.03825	1.86553e-06	5.85087e-05	1	1.07	0.86	0.68	0.59	0.64	SLIT3	chr5	protein_coding	slit homolog 3 (Drosophila)
ENSG00000188293.5	-0.845611	-0.178802	0.000667076	0.00983909	0.93	0.56	0.74	1.24	1.22	1.45	IGFL1	chr19	protein_coding	IGF-like family member 1
ENSG00000261786.1	0.66431	2.64768	3.50297e-07	1.2755e-05	1.28	1.77	1.34	0.83	0.97	0.9	RP4-555D20.2	chr3	lincRNA	--
ENSG00000080573.6	-1.52154	-0.289709	8.57324e-09	4.04811e-07	0.07	0.05	0.07	0.24	0.13	0.14	COL5A3	chr19	protein_coding	collagen, type V, alpha 3
ENSG00000244558.5	-1.13139	-1.00118	0.00063752	0.00948945	0.22	0.19	0.3	0.58	0.47	0.47	KCNK15-AS1	chr20	antisense	KCNK15 antisense RNA 1 (head to head)
ENSG00000025708.12	-1.62658	5.71914	7.33973e-51	3.17938e-48	12.32	12.13	15.88	37.08	39.69	44.41	TYMP	chr22	protein_coding	thymidine phosphorylase
ENSG00000206113.7	-4.44999	-3.43328	0.00808871	0.0706704	0	0	0	0.03	0	0.03	RP11-503N18.1	chr4	lincRNA	--
ENSG00000204610.12	-1.09314	-0.89797	0.000738482	0.0106785	0.16	0.05	0.19	0.32	0.31	0.2	TRIM15	chr6	protein_coding	tripartite motif containing 15
ENSG00000028137.16	-1.9454	2.11948	1.12514e-37	2.92428e-35	0.35	0.42	0.61	1.61	1.8	1.78	TNFRSF1B	chr1	protein_coding	tumor necrosis factor receptor superfamily, member 1B
ENSG00000236643.1	-1.53299	-2.14088	0.00476563	0.0473011	0.31	0.04	0.05	0.17	0.45	0.53	RP11-175D17.3	chr9	antisense	--
ENSG00000100271.16	-0.619713	1.03436	0.000506859	0.0078617	0.72	0.84	1.22	1.51	1.39	1.26	TTLL1	chr22	protein_coding	tubulin tyrosine ligase-like family member 1
ENSG00000069667.15	1.53844	-1.89617	0.0014861	0.0187181	0.03	0.03	0.02	0.01	0	0.02	RORA	chr15	protein_coding	RAR-related orphan receptor A
ENSG00000011347.9	0.79621	-0.160234	0.000966155	0.0133014	0.17	0.16	0.21	0.11	0.08	0.12	SYT7	chr11	protein_coding	synaptotagmin VII
ENSG00000073605.18	-1.77052	1.57063	2.51089e-26	4.2641e-24	0.69	0.51	0.92	2.48	2.58	1.98	GSDMB	chr17	protein_coding	gasdermin B
ENSG00000204264.8	-1.44175	7.5288	1.07105e-42	3.20126e-40	51.87	53.55	81.33	161.08	167.16	166.16	PSMB8	chr6	protein_coding	proteasome (prosome, macropain) subunit, beta type, 8
ENSG00000100422.13	0.621175	4.08362	4.19685e-08	1.78435e-06	4.47	4.84	4.11	2.84	2.98	2.69	CERK	chr22	protein_coding	ceramide kinase
ENSG00000116701.14	-1.00385	1.7848	3.98341e-11	2.52782e-09	0.75	0.95	0.97	1.69	1.76	1.77	NCF2	chr1	protein_coding	neutrophil cytosolic factor 2
ENSG00000165309.13	1.66334	-2.1391	0.00209952	0.0245092	0.09	0.03	0.08	0.01	0.02	0.02	ARMC3	chr10	protein_coding	armadillo repeat containing 3
ENSG00000104951.15	-1.63204	2.42367	4.38757e-31	9.10695e-29	0.76	1.12	1.05	2.12	3.27	3.43	IL4I1	chr19	protein_coding	interleukin 4 induced 1
ENSG00000179674.3	-1.16178	2.62785	2.87746e-18	3.23325e-16	2.49	3.07	2.93	7.45	6.14	5	ARL14	chr3	protein_coding	ADP-ribosylation factor-like 14
ENSG00000234779.1	1.35793	-0.552814	1.89498e-06	5.93079e-05	3.54	1.32	1.32	1.05	0.59	0.71	RP11-62F24.2	chr9	antisense	--
ENSG00000242366.3	-0.815875	7.02032	5.21206e-15	4.80812e-13	39.98	32.34	41.35	74.71	65.65	55.33	UGT1A8	chr2	protein_coding	UDP glucuronosyltransferase 1 family, polypeptide A8
ENSG00000070190.12	-3.22559	-1.43528	8.3874e-12	5.69752e-10	0.03	0.01	0.02	0.29	0.18	0.08	DAPP1	chr4	protein_coding	dual adaptor of phosphotyrosine and 3-phosphoinositides
ENSG00000107551.20	-0.682502	1.62109	1.11212e-05	0.000290054	0.6	0.65	0.6	0.88	0.93	1.07	RASSF4	chr10	protein_coding	Ras association (RalGDS/AF-6) domain family member 4
ENSG00000109072.13	-1.60499	4.83269	5.00727e-47	1.89446e-44	6.19	5.2	7.66	19.46	19.05	18	VTN	chr17	protein_coding	vitronectin
ENSG00000130303.12	-2.8139	6.34768	1.61924e-139	8.06623e-136	13.57	13.82	30.51	134.01	133.56	129.25	BST2	chr19	protein_coding	bone marrow stromal cell antigen 2
ENSG00000228696.8	-1.12923	-1.14138	0.00131758	0.0170408	0.07	0.11	0.12	0.27	0.17	0.2	ARL17B	chr17	protein_coding	ADP-ribosylation factor-like 17B
ENSG00000170122.5	0.782694	-0.405321	0.00354137	0.0376549	0.46	0.52	0.33	0.29	0.19	0.26	FOXD4	chr9	protein_coding	forkhead box D4
ENSG00000176907.4	-0.933716	6.28129	8.72227e-19	1.02638e-16	27.15	25.21	31.51	63.49	50.31	42.92	C8orf4	chr8	protein_coding	chromosome 8 open reading frame 4
ENSG00000165521.15	1.15928	-0.859067	0.00023516	0.00413209	0.07	0.08	0.06	0.02	0.04	0.03	EML5	chr14	protein_coding	echinoderm microtubule associated protein like 5
ENSG00000135047.14	-0.748043	9.32915	3.8245e-13	3.02409e-11	182.42	205.41	203.57	330.82	325.14	312.35	CTSL	chr9	protein_coding	cathepsin L
ENSG00000273171.1	-1.7086	3.92158	2.18984e-46	7.61072e-44	8.26	5.33	10.58	27.02	26.35	23.65	CTB-96E2.2	chr17	protein_coding	--
ENSG00000230356.1	-4.45003	-3.43326	0.00808871	0.0706704	0	0	0	0.04	0	0.07	NCAPD2P1	chr7	processed_pseudogene	non-SMC condensin I complex, subunit D2 pseudogene 1
ENSG00000213385.3	0.63215	-0.0522511	0.00712494	0.0646305	1.56	0.95	1.57	0.76	0.86	0.93	RP11-577H5.1	chr7	processed_pseudogene	--
ENSG00000137726.15	-0.994818	-0.668663	0.000699909	0.0102047	0.1	0.02	0.12	0.13	0.23	0.11	FXYD6	chr11	protein_coding	FXYD domain containing ion transport regulator 6
ENSG00000225335.3	-1.35582	-0.813742	1.91457e-05	0.000469439	0.09	0.11	0.18	0.26	0.27	0.4	XXbac-B476C20.9	chr22	antisense	--
ENSG00000115844.10	0.684415	0.200269	0.00196316	0.0233959	0.31	0.55	0.48	0.25	0.32	0.23	DLX2	chr2	protein_coding	distal-less homeobox 2
ENSG00000281348.1	-0.618891	1.74781	4.42983e-05	0.00097427	3.91	4.56	5.14	7.12	6.75	6.52	CTD-2574D22.6	chr16	protein_coding	--
ENSG00000268006.1	1.2593	-1.13938	0.000272903	0.00466369	0.13	0.17	0.09	0.06	0.04	0.06	PTOV1-AS1	chr19	antisense	PTOV1 antisense RNA 1
ENSG00000258554.1	4.51373	-3.4325	0.00808871	0.0706704	0.2	0	0.2	0	0	0	RP11-973D8.4	chr12	antisense	--
ENSG00000271933.1	-1.57676	-0.849639	1.35981e-06	4.39865e-05	0.14	0.06	0.13	0.38	0.28	0.32	RP11-338I21.1	chr10	antisense	--
ENSG00000125735.10	-0.877566	-0.248801	0.000583386	0.00879641	0.06	0.11	0.17	0.19	0.24	0.17	TNFSF14	chr19	protein_coding	tumor necrosis factor (ligand) superfamily, member 14
ENSG00000061656.9	-0.816855	2.17276	7.22683e-09	3.47831e-07	2.14	2.01	2.3	3.6	3.74	3.73	SPAG4	chr20	protein_coding	sperm associated antigen 4
ENSG00000185404.16	-1.01703	4.56848	5.55545e-20	6.91862e-18	2.84	3.43	4.46	7.65	7.04	6.52	SP140L	chr2	protein_coding	SP140 nuclear body protein-like
ENSG00000224078.12	0.96806	3.80448	7.13649e-17	7.43214e-15	0.63	0.66	0.56	0.38	0.29	0.26	SNHG14	chr15	processed_transcript	small nucleolar RNA host gene 14
ENSG00000233429.9	0.678316	2.70642	1.64728e-07	6.43602e-06	6.66	6.64	6.85	4.35	4.07	3.87	HOTAIRM1	chr7	antisense	HOXA transcript antisense RNA, myeloid-specific 1
ENSG00000126467.10	-2.99193	-3.17049	0.00671615	0.0617468	0.01	0	0	0.02	0.07	0.04	TSKS	chr19	protein_coding	testis-specific serine kinase substrate
ENSG00000172183.14	-2.0341	6.91502	1.88208e-79	1.33937e-76	18.74	16.91	28.5	80.84	86.98	88.16	ISG20	chr15	protein_coding	interferon stimulated exonuclease gene 20kDa
ENSG00000205810.8	-0.996703	-0.700584	0.000804684	0.0114421	0.22	0.14	0.59	0.71	0.71	0.42	KLRC3	chr12	protein_coding	killer cell lectin-like receptor subfamily C, member 3
ENSG00000147003.5	-1.12102	1.22925	8.86062e-11	5.33034e-09	0.68	0.77	1.2	1.94	2.15	1.53	TMEM27	chrX	protein_coding	transmembrane protein 27
ENSG00000166592.11	-1.57914	1.10753	4.86374e-18	5.38416e-16	0.75	0.48	0.7	1.38	1.81	2.38	RRAD	chr16	protein_coding	Ras-related associated with diabetes
ENSG00000106804.7	-0.646701	3.89924	1.86232e-08	8.40829e-07	2.22	1.64	2.31	4.24	3	2.22	C5	chr9	protein_coding	complement component 5
ENSG00000196116.7	-0.738097	5.43832	5.48688e-12	3.78747e-10	7.4	7.79	9.46	14.38	14.05	11.71	TDRD7	chr9	protein_coding	tudor domain containing 7
ENSG00000124205.15	-0.999491	-0.733582	0.000926158	0.0128157	0.15	0.07	0.17	0.46	0.18	0.13	EDN3	chr20	protein_coding	endothelin 3
ENSG00000136826.14	-0.76712	3.25112	3.29135e-10	1.86687e-08	2.37	2.54	2.04	3.72	3.73	4.07	KLF4	chr9	protein_coding	Kruppel-like factor 4 (gut)
ENSG00000205464.11	-1.22167	-1.08379	0.000392472	0.00634429	0.09	0.1	0.1	0.2	0.21	0.24	ATP6AP1L	chr5	protein_coding	ATPase, H+ transporting, lysosomal accessory protein 1-like
ENSG00000166979.12	-0.817647	6.09344	9.8985e-15	8.91133e-13	22.98	21.87	26.84	40.1	42.33	40.73	EVA1C	chr21	protein_coding	eva-1 homolog C (C. elegans)
ENSG00000206073.10	-0.91526	-0.249007	0.000340676	0.00563814	0.36	0.23	0.31	0.71	0.61	0.35	SERPINB4	chr18	protein_coding	serpin peptidase inhibitor, clade B (ovalbumin), member 4
ENSG00000240053.8	1.36424	-1.8233	0.00346361	0.0369728	0.14	0.11	0.1	0.02	0.04	0.07	LY6G5B	chr6	protein_coding	lymphocyte antigen 6 complex, locus G5B
ENSG00000234160.1	0.752356	1.18396	8.91047e-06	0.000236733	8.39	11.02	8.72	5.48	5.35	5.44	RP11-613M10.6	chr9	antisense	--
ENSG00000121005.8	-0.595758	0.162201	0.00715197	0.0648363	0.18	0.2	0.17	0.3	0.26	0.25	CRISPLD1	chr8	protein_coding	cysteine-rich secretory protein LCCL domain containing 1
ENSG00000273576.1	-0.63821	0.50571	0.00160017	0.0198602	1.24	1.34	2.24	2.46	2.67	2.16	RP11-390P24.1	chr17	lincRNA	--
ENSG00000111913.15	-2.69679	-1.23317	1.36589e-10	8.02063e-09	0.01	0	0.02	0.1	0.05	0.07	FAM65B	chr6	protein_coding	family with sequence similarity 65, member B
ENSG00000111335.12	-2.25435	8.34497	1.67397e-97	1.7869e-94	12.3	12.39	27.85	82.24	82.67	79.55	OAS2	chr12	protein_coding	2'-5'-oligoadenylate synthetase 2, 69/71kDa
ENSG00000101115.12	0.597579	0.0275746	0.00943888	0.0793806	0.21	0.22	0.22	0.16	0.15	0.11	SALL4	chr20	protein_coding	spalt-like transcription factor 4
ENSG00000119915.4	-0.899691	0.966022	7.12672e-07	2.4597e-05	0.62	1.02	1.16	1.54	1.92	1.63	ELOVL3	chr10	protein_coding	ELOVL fatty acid elongase 3
ENSG00000166448.14	-1.38993	-1.43381	0.00060313	0.0090406	0.09	0.02	0.01	0.13	0.05	0.13	TMEM130	chr7	protein_coding	transmembrane protein 130
ENSG00000169903.6	-0.613896	6.17356	5.37522e-09	2.63377e-07	28.34	20.49	30.12	48.77	37.24	32.28	TM4SF4	chr3	protein_coding	transmembrane 4 L six family member 4
ENSG00000224043.7	1.36302	-0.359078	3.16015e-07	1.16322e-05	1.59	1.04	1.92	0.7	0.34	0.67	CCNT2-AS1	chr2	antisense	CCNT2 antisense RNA 1
ENSG00000105668.7	-0.908487	0.0636798	8.43427e-05	0.00170538	0.38	0.38	0.7	0.48	1.1	1.08	UPK1A	chr19	protein_coding	uroplakin 1A
ENSG00000277644.1	4.74497	-2.16732	1.12922e-09	6.02701e-08	2.81	0.55	16.76	0.54	0	0	FP236383.12	chr21	miRNA	--
ENSG00000274828.1	0.682711	1.1723	5.76374e-05	0.0012244	1.08	1.42	1.33	0.7	0.82	0.8	RP11-567M16.6	chr18	lincRNA	--
ENSG00000204261.8	-1.6899	2.44325	4.88976e-33	1.07463e-30	1.43	1.76	2.29	5.58	6.13	5.51	PSMB8-AS1	chr6	lincRNA	PSMB8 antisense RNA 1 (head to head)
ENSG00000119922.8	-2.69629	7.22745	3.12534e-132	1.16767e-128	8.69	9.41	15.32	79.25	73.57	58.83	IFIT2	chr10	protein_coding	interferon-induced protein with tetratricopeptide repeats 2
ENSG00000233654.1	1.42217	-1.70926	0.00146576	0.0185478	1.09	0.67	0.91	0.33	0.13	0.5	AC093388.3	chr2	antisense	--
ENSG00000224420.3	0.776898	2.26901	1.6992e-08	7.73021e-07	3.67	3.47	3.08	1.74	2.11	1.96	ADM5	chr19	protein_coding	adrenomedullin 5 (putative)
ENSG00000079257.7	-0.602088	4.03961	1.21334e-07	4.81614e-06	11.45	10.08	12.41	18.36	17.66	14.31	LXN	chr3	protein_coding	latexin
ENSG00000227039.6	-0.964224	-0.756026	0.00154633	0.0192898	0.12	0.13	0.17	0.26	0.25	0.31	ITGB2-AS1	chr21	antisense	ITGB2 antisense RNA 1
ENSG00000271895.2	1.50156	-2.23051	0.00710944	0.064556	0.38	0.25	0.43	0.16	0.08	0.12	RP4-635E18.8	chr1	antisense	--
ENSG00000155918.7	-3.26228	-0.446305	7.5506e-22	1.05458e-19	0.12	0.04	0.11	0.86	1	0.7	RAET1L	chr6	protein_coding	retinoic acid early transcript 1L
ENSG00000177669.3	-1.8107	-2.39785	0.00274535	0.0307095	0.05	0.02	0.04	0.07	0.1	0.22	MBOAT4	chr8	protein_coding	membrane bound O-acyltransferase domain containing 4
ENSG00000101213.6	-0.626673	0.83398	0.000674547	0.00991762	0.36	0.63	0.35	0.69	0.69	0.64	PTK6	chr20	protein_coding	protein tyrosine kinase 6
ENSG00000188095.4	-0.90458	-0.897993	0.00396496	0.0411631	0.14	0.14	0.27	0.34	0.4	0.26	MESP2	chr15	protein_coding	mesoderm posterior basic helix-loop-helix transcription factor 2
ENSG00000101198.14	-0.81132	-0.313708	0.00144675	0.0183618	0.41	0.29	0.19	0.46	0.53	0.53	NKAIN4	chr20	protein_coding	Na+/K+ transporting ATPase interacting 4
ENSG00000233818.1	-0.676272	0.622065	0.00052622	0.00809896	0.8	1.03	0.99	1.21	1.62	1.55	AP000695.4	chr21	antisense	--
ENSG00000184378.2	-0.593341	1.74724	8.94995e-05	0.00179591	1.11	1.35	1.36	2.04	2.01	1.57	ACTRT3	chr3	protein_coding	actin-related protein T3
ENSG00000186907.7	-0.878023	6.17115	9.16589e-17	9.4144e-15	19.43	18.35	24.12	32.1	37.25	41.29	RTN4RL2	chr11	protein_coding	reticulon 4 receptor-like 2
ENSG00000257151.1	1.80485	-1.05304	2.09133e-07	7.97292e-06	0.1	0.18	0.15	0.06	0.04	0.02	PWAR6	chr15	lincRNA	Prader Willi/Angelman region RNA 6
ENSG00000182621.16	-0.595565	0.893614	0.00112513	0.0149795	0.11	0.15	0.14	0.27	0.17	0.16	PLCB1	chr20	protein_coding	phospholipase C, beta 1 (phosphoinositide-specific)
ENSG00000265460.6	-4.45003	-3.43326	0.00808871	0.0706704	0	0	0	0.06	0	0.1	RP11-690G19.4	chr17	transcribed_processed_pseudogene	--
ENSG00000216588.8	1.05325	-1.52492	0.00704445	0.0641144	0.33	0.33	0.52	0	0.21	0.33	IGSF23	chr19	protein_coding	immunoglobulin superfamily, member 23
ENSG00000138760.8	-0.845535	6.69496	6.81157e-16	6.67512e-14	14.32	14.41	16.53	28.83	27.02	23.58	SCARB2	chr4	protein_coding	scavenger receptor class B, member 2
ENSG00000151617.15	-1.07463	-1.12652	0.00203198	0.0239486	0.03	0.05	0.1	0.13	0.13	0.12	EDNRA	chr4	protein_coding	endothelin receptor type A
ENSG00000107796.12	-0.921364	3.75751	2.70376e-15	2.55736e-13	4.94	4.51	5.58	8.66	9.63	9.43	ACTA2	chr10	protein_coding	actin, alpha 2, smooth muscle, aorta
ENSG00000111181.12	-2.02942	-1.31338	2.07207e-07	7.91969e-06	0.07	0.02	0.01	0.14	0.09	0.19	SLC6A12	chr12	protein_coding	solute carrier family 6 (neurotransmitter transporter), member 12
ENSG00000249599.1	0.844523	-0.972325	0.00959932	0.0804469	1.29	0.9	1.16	0.77	0.55	0.5	BMPR1B-AS1	chr4	lincRNA	BMPR1B antisense RNA 1 (head to head)
ENSG00000144583.4	0.693755	3.03354	2.46976e-08	1.08557e-06	2.09	2.77	1.74	1.38	1.12	1.47	2021-03-04	chr2	protein_coding	membrane-associated ring finger (C3HC4) 4, E3 ubiquitin protein ligase
ENSG00000103522.15	-2.72522	-2.84859	0.00146987	0.0185684	0	0.01	0.01	0.01	0.03	0.04	IL21R	chr16	protein_coding	interleukin 21 receptor
ENSG00000200959.1	-1.68112	-2.46993	0.00676608	0.0621294	0.28	0	0.57	1.47	0.64	0.64	SNORA74A	chr5	snoRNA	small nucleolar RNA, H/ACA box 74A
ENSG00000189060.5	-0.597691	8.10188	6.99962e-09	3.3853e-07	84.35	89.37	97.9	137.28	133.13	130.37	H1F0	chr22	protein_coding	H1 histone family, member 0
ENSG00000137699.16	-0.934264	2.33229	1.20407e-11	8.03312e-10	0.51	0.68	0.66	1	1.1	1.34	TRIM29	chr11	protein_coding	tripartite motif containing 29
ENSG00000169594.12	1.00106	-1.24625	0.00486995	0.0480877	0.08	0.12	0.1	0.02	0.04	0.08	BNC1	chr15	protein_coding	basonuclin 1
ENSG00000272644.1	0.943466	0.166259	2.50802e-05	0.000595428	3.14	2.78	3.11	1.91	1.67	1	RP11-33O4.1	chr2	lincRNA	--
ENSG00000114268.11	-0.882348	3.30368	4.23054e-13	3.32754e-11	1.73	1.68	2.2	3.08	3.14	3.82	PFKFB4	chr3	protein_coding	6-phosphofructo-2-kinase/fructose-2,6-biphosphatase 4
ENSG00000263280.1	-1.09865	-0.936218	0.000641422	0.00952383	0.5	0.32	0.47	1.07	1.06	0.57	LA16c-325D7.2	chr16	lincRNA	--
ENSG00000233006.6	0.657785	0.800838	0.000403531	0.00648448	0.87	1.05	0.69	0.54	0.54	0.54	AC034220.3	chr5	processed_transcript	--
ENSG00000255513.1	1.11335	-1.32733	0.00239261	0.0274415	0.71	1.31	1.94	0.45	0.51	0.79	AC005363.9	chr16	transcribed_processed_pseudogene	--
ENSG00000174837.14	-1.55124	6.01656	3.54671e-47	1.35907e-44	8.44	8.81	12.39	26.05	28.66	29.85	ADGRE1	chr19	protein_coding	adhesion G protein-coupled receptor E1
ENSG00000143036.16	-0.791873	1.66099	2.96812e-07	1.09931e-05	0.82	0.84	0.99	1.46	1.64	1.36	SLC44A3	chr1	protein_coding	solute carrier family 44, member 3
ENSG00000103056.11	-1.42715	-2.2007	0.00710944	0.064556	0.01	0	0.04	0.04	0.04	0.05	SMPD3	chr16	protein_coding	sphingomyelin phosphodiesterase 3, neutral membrane (neutral sphingomyelinase II)
ENSG00000185201.16	-1.72038	8.32882	1.29032e-59	6.76601e-57	120.37	113.89	178.02	440.14	448.13	436.51	IFITM2	chr11	protein_coding	interferon induced transmembrane protein 2
ENSG00000183287.13	0.63179	0.897324	0.000535625	0.00819729	0.38	0.41	0.24	0.22	0.19	0.24	CCBE1	chr18	protein_coding	collagen and calcium binding EGF domains 1
ENSG00000106927.11	-1.18162	1.8154	9.80939e-15	8.85779e-13	1.48	1.02	1.8	2.85	3.47	3.15	AMBP	chr9	protein_coding	alpha-1-microglobulin/bikunin precursor
ENSG00000167311.13	-1.53028	-1.92307	0.0016759	0.0206136	0.05	0.06	0.07	0.14	0.23	0.15	ART5	chr11	protein_coding	ADP-ribosyltransferase 5
ENSG00000273456.1	0.725792	-0.262071	0.00384518	0.0401427	1.56	1.6	1.05	0.9	0.64	0.94	RP11-686O6.2	chr2	lincRNA	--
ENSG00000167850.3	-2.05681	-2.43361	0.00110328	0.0147356	0.05	0	0.04	0.03	0.17	0.18	CD300C	chr17	protein_coding	CD300c molecule
ENSG00000281344.1	0.604739	2.25322	1.14291e-05	0.000297564	0.02	0.03	0.03	0.02	0.02	0.02	HELLPAR	chr12	macro_lncRNA	HELLP associated long non-coding RNA
ENSG00000272129.1	2.05897	-2.02611	0.000102114	0.00201191	0.27	0.21	0.16	0.09	0.02	0.04	RP11-250B2.6	chr6	lincRNA	--
ENSG00000172955.17	-1.31008	1.85648	1.08458e-17	1.16608e-15	0.73	0.14	0.71	2.36	0.98	0.5	ADH6	chr4	protein_coding	alcohol dehydrogenase 6 (class V)
ENSG00000237310.1	0.754872	1.32522	4.57299e-06	0.0001314	6.02	5.6	5.03	3.28	2.82	3.52	GS1-124K5.4	chr7	lincRNA	--
ENSG00000100600.14	-0.7821	6.53968	8.611e-14	7.27046e-12	29.49	28.6	33.45	52.45	50.82	50.23	LGMN	chr14	protein_coding	legumain
ENSG00000214049.6	-1.47536	-1.31319	0.000131137	0.00250772	0.07	0.07	0.09	0.13	0.22	0.28	UCA1	chr19	processed_transcript	urothelial cancer associated 1 (non-protein coding)
ENSG00000273448.1	-0.73854	0.168713	0.000863208	0.0120619	0.47	0.54	0.72	0.79	0.82	1.21	RP11-166O4.6	chr7	lincRNA	--
ENSG00000280102.2	-0.63588	2.46887	2.09408e-06	6.4793e-05	80.59	33.06	42.12	77.21	72.3	86.52	RN7SL2	chr14	miRNA	RNA, 7SL, cytoplasmic 2
ENSG00000183346.6	-1.11957	-0.658738	0.000141163	0.0026687	0.2	0.16	0.27	0.55	0.56	0.23	C10orf107	chr10	protein_coding	chromosome 10 open reading frame 107
ENSG00000167183.2	-0.981613	0.220646	1.05527e-05	0.000275948	0.63	0.18	0.62	1.3	0.89	0.57	PRR15L	chr17	protein_coding	proline rich 15-like
ENSG00000187726.8	-1.41839	0.679814	1.48678e-12	1.10543e-10	0.3	0.21	0.24	0.5	0.69	0.75	DNAJB13	chr11	protein_coding	DnaJ (Hsp40) homolog, subfamily B, member 13
ENSG00000215386.10	-0.886047	-0.872958	0.00437707	0.0442728	0.06	0.06	0.1	0.13	0.1	0.15	MIR99AHG	chr21	lincRNA	mir-99a-let-7c cluster host gene
ENSG00000168955.3	-1.09606	5.27506	4.7113e-24	7.49021e-22	12.08	5.92	13.2	31.4	21.36	12.82	TM4SF20	chr2	protein_coding	transmembrane 4 L six family member 20
ENSG00000234289.5	-0.65649	3.83387	1.31301e-08	6.04691e-07	24.44	20.06	25.24	35.46	37.56	34.17	H2BFS	chr21	protein_coding	H2B histone family, member S (pseudogene)
ENSG00000250988.7	0.69069	2.28078	5.29842e-07	1.86751e-05	7.83	7.6	6.44	4	4.71	4.48	SNHG21	chr15	antisense	small nucleolar RNA host gene 21
ENSG00000204335.3	-1.64207	-0.962704	1.69966e-06	5.3872e-05	0.12	0.11	0.08	0.32	0.39	0.25	SP5	chr2	protein_coding	Sp5 transcription factor
ENSG00000279191.1	0.807706	-0.0952901	0.000813165	0.0115343	0.38	0.33	0.26	0.15	0.2	0.2	RP11-803D5.1	chr2	TEC	--
ENSG00000274383.1	0.736442	-0.277418	0.00359869	0.0380479	1.75	1.56	2.12	1.27	1.02	0.88	CTD-2017F17.2	chr15	antisense	--
ENSG00000150625.16	-2.73459	-1.80208	1.26618e-07	5.01255e-06	0	0.01	0.04	0.08	0.11	0.09	GPM6A	chr4	protein_coding	glycoprotein M6A
ENSG00000074370.17	-0.626562	2.74119	1.26356e-06	4.1236e-05	1.16	0.84	1.11	1.67	1.6	1.41	ATP2A3	chr17	protein_coding	ATPase, Ca++ transporting, ubiquitous
ENSG00000169436.16	-1.01023	-1.31289	0.00754856	0.0675102	0.04	0.03	0.03	0.05	0.07	0.09	COL22A1	chr8	protein_coding	collagen, type XXII, alpha 1
ENSG00000181804.14	-1.32151	-0.365325	7.78689e-07	2.6595e-05	0.1	0.16	0.07	0.28	0.24	0.28	SLC9A9	chr3	protein_coding	solute carrier family 9, subfamily A (NHE9, cation proton antiporter 9), member 9
ENSG00000196975.14	-0.769917	8.42892	9.17367e-14	7.68044e-12	121.63	89.95	131.13	234.22	187.63	150.49	ANXA4	chr2	protein_coding	annexin A4
ENSG00000259066.5	0.819731	-0.432048	0.001827	0.0220635	1.49	1.7	1.43	0.91	1.01	0.64	RP11-371E8.4	chr14	protein_coding	--
ENSG00000144749.13	-0.762136	2.29907	3.0752e-08	1.34182e-06	0.52	0.72	0.69	1.23	1.06	0.92	LRIG1	chr3	protein_coding	leucine-rich repeats and immunoglobulin-like domains 1
ENSG00000164342.12	-1.63811	3.62892	3.71141e-41	1.05648e-38	0.82	0.75	1.23	3.34	2.82	2.34	TLR3	chr4	protein_coding	toll-like receptor 3
ENSG00000197191.4	-0.847306	-0.179683	0.00049433	0.0076927	0.34	0.6	0.37	0.61	0.8	0.9	CYSRT1	chr9	protein_coding	cysteine-rich tail protein 1
ENSG00000231890.7	-0.634289	-0.0833015	0.00905187	0.0769049	0.11	0.11	0.23	0.23	0.24	0.21	DARS-AS1	chr2	antisense	DARS antisense RNA 1
ENSG00000187608.8	-1.4634	9.87999	1.39699e-44	4.53856e-42	460.5	435.99	653.47	1261.94	1366.99	1531.53	ISG15	chr1	protein_coding	ISG15 ubiquitin-like modifier
ENSG00000174808.11	-1.07343	1.99594	2.51432e-13	2.0533e-11	0.78	0.83	1	2.07	1.69	1.6	BTC	chr4	protein_coding	betacellulin
ENSG00000085276.17	-1.16291	-0.408594	1.48549e-05	0.000375314	0.06	0.07	0.06	0.19	0.14	0.08	MECOM	chr3	protein_coding	MDS1 and EVI1 complex locus
ENSG00000257303.1	0.812671	-0.31957	0.00144675	0.0183618	1.2	2.11	1.52	0.92	0.97	0.79	RP11-977G19.11	chr12	antisense	--
ENSG00000198133.8	-2.18927	1.20073	1.15521e-31	2.4488e-29	0.17	0.13	0.26	0.74	0.88	0.87	TMEM229B	chr14	protein_coding	transmembrane protein 229B
ENSG00000279384.1	1.40711	-1.97327	0.00463654	0.0463509	0.48	0.43	0.23	0.04	0.31	0.07	RP11-635L1.2	chr4	TEC	--
ENSG00000163082.9	-0.68469	1.25624	4.55069e-05	0.00099645	0.49	0.48	0.59	0.78	0.91	0.75	SGPP2	chr2	protein_coding	sphingosine-1-phosphate phosphatase 2
ENSG00000130487.5	-1.98566	0.206589	1.20796e-16	1.23647e-14	0.13	0.12	0.18	0.35	0.65	0.64	KLHDC7B	chr22	protein_coding	kelch domain containing 7B
ENSG00000104760.16	-0.955795	3.72079	3.28772e-16	3.28651e-14	4.04	2.31	4.02	8.49	6.61	4.59	FGL1	chr8	protein_coding	fibrinogen-like 1
ENSG00000124126.13	0.859032	2.75558	2.98288e-11	1.90911e-09	1.2	1.46	1.14	0.58	0.71	0.75	PREX1	chr20	protein_coding	phosphatidylinositol-3,4,5-trisphosphate-dependent Rac exchange factor 1
ENSG00000070731.9	-2.11765	-2.39837	0.000674912	0.00991762	0.03	0.04	0	0.13	0.09	0.06	ST6GALNAC2	chr17	protein_coding	ST6 (alpha-N-acetyl-neuraminyl-2,3-beta-galactosyl-1,3)-N-acetylgalactosaminide alpha-2,6-sialyltransferase 2
ENSG00000196912.12	0.605824	0.518328	0.00245992	0.0280414	0.26	0.25	0.26	0.22	0.15	0.12	ANKRD36B	chr2	protein_coding	ankyrin repeat domain 36B
ENSG00000189223.13	-1.13289	0.856723	2.14507e-09	1.10732e-07	0.07	0.04	0.09	0.14	0.16	0.15	PAX8-AS1	chr2	processed_transcript	PAX8 antisense RNA 1
ENSG00000232480.1	1.03393	-1.01236	0.00172249	0.0210767	1.09	1.16	0.86	0.62	0.23	0.64	TGFB2-AS1	chr1	antisense	TGFB2 antisense RNA 1 (head to head)
ENSG00000181856.14	-1.02129	-1.06975	0.00263521	0.0297109	0.06	0.09	0.06	0.1	0.13	0.17	SLC2A4	chr17	protein_coding	solute carrier family 2 (facilitated glucose transporter), member 4
ENSG00000269954.1	3.10455	-3.16964	0.00671615	0.0617468	0.22	0.21	0.17	0	0	0.05	RP11-148O21.6	chr8	lincRNA	--
ENSG00000197903.7	-0.678013	4.99975	4.10715e-10	2.28176e-08	61.83	63.25	62.66	99.08	98.01	95.75	HIST1H2BK	chr6	protein_coding	histone cluster 1, H2bk
ENSG00000144891.17	-0.906548	-0.120323	0.000249462	0.00434003	0.18	0.19	0.18	0.46	0.3	0.26	AGTR1	chr3	protein_coding	angiotensin II receptor, type 1
ENSG00000126246.9	-0.614392	4.3429	3.77377e-08	1.61925e-06	8.83	8.47	9.06	11.72	13.76	13.8	IGFLR1	chr19	protein_coding	IGF-like family receptor 1
ENSG00000171916.16	-2.00101	-0.598096	7.95788e-11	4.80511e-09	0.11	0.12	0.16	0.58	0.6	0.36	LGALS9C	chr17	protein_coding	lectin, galactoside-binding, soluble, 9C
ENSG00000135124.14	-0.815455	3.77535	2.25099e-12	1.63698e-10	4.78	4.19	4.85	7.75	7.99	7.96	P2RX4	chr12	protein_coding	purinergic receptor P2X, ligand gated ion channel, 4
ENSG00000125384.6	-0.89913	0.0377032	0.000117338	0.00227293	0.27	0.24	0.29	0.51	0.44	0.49	PTGER2	chr14	protein_coding	prostaglandin E receptor 2 (subtype EP2), 53kDa
ENSG00000180210.14	-1.07708	2.17382	3.89407e-14	3.36387e-12	1.36	1.29	1.46	2.84	3.01	2.61	F2	chr11	protein_coding	coagulation factor II (thrombin)
ENSG00000198099.8	-1.96668	-0.911528	1.25312e-08	5.80692e-07	0.15	0.04	0.07	0.69	0.19	0.13	ADH4	chr4	protein_coding	alcohol dehydrogenase 4 (class II), pi polypeptide
ENSG00000257621.7	0.617089	3.22826	4.0463e-07	1.45186e-05	1.99	2.13	1.84	1.34	1.36	1.09	PSMA3-AS1	chr14	antisense	PSMA3 antisense RNA 1
ENSG00000107485.15	-0.901545	2.84107	2.09458e-12	1.53444e-10	1.32	1.7	1.67	2.65	2.93	2.94	GATA3	chr10	protein_coding	GATA binding protein 3
ENSG00000280002.1	-0.673366	1.126	9.95372e-05	0.00197155	0.88	0.68	1.22	1.52	1.45	1.34	RP11-76C10.6	chr12	TEC	--
ENSG00000172867.3	-2.81092	-2.80128	0.000830142	0.0117259	0.01	0.01	0	0.01	0.05	0.12	KRT2	chr12	protein_coding	keratin 2, type II
ENSG00000107614.21	0.621415	1.80509	3.09384e-05	0.000715172	0.97	0.99	1	0.73	0.56	0.6	TRDMT1	chr10	protein_coding	tRNA aspartic acid methyltransferase 1
ENSG00000107282.7	-0.874961	-0.67934	0.00295368	0.0326127	0.07	0.05	0.06	0.12	0.1	0.09	APBA1	chr9	protein_coding	amyloid beta (A4) precursor protein-binding, family A, member 1
ENSG00000170345.9	-0.786414	2.82882	9.28853e-10	5.00225e-08	1.77	1.25	2.1	3.51	2.63	2.49	FOS	chr14	protein_coding	FBJ murine osteosarcoma viral oncogene homolog
ENSG00000204682.5	0.858254	4.21607	2.67358e-14	2.35725e-12	6.52	6.12	5.68	2.86	3.43	3.54	CASC10	chr10	protein_coding	cancer susceptibility candidate 10
ENSG00000213689.9	-1.23329	5.04032	1.93996e-29	3.76515e-27	7.9	7.57	10.5	17.96	20.26	21.2	TREX1	chr3	protein_coding	three prime repair exonuclease 1
ENSG00000099377.13	-0.753999	4.80416	5.60267e-12	3.84961e-10	8.84	8.04	8.62	13.3	14.24	14.35	HSD3B7	chr16	protein_coding	hydroxy-delta-5-steroid dehydrogenase, 3 beta- and steroid delta-isomerase 7
ENSG00000264006.6	-2.21645	-2.80156	0.00488174	0.0481323	0.01	0.02	0	0.11	0.08	0	AKR1C8P	chr10	transcribed_unprocessed_pseudogene	aldo-keto reductase family 1, member C8, pseudogene
ENSG00000147676.13	-3.96735	-2.62655	7.39799e-06	0.000201017	0	0	0.01	0.04	0.07	0.05	MAL2	chr8	protein_coding	mal, T-cell differentiation protein 2 (gene/pseudogene)
ENSG00000245888.6	-1.48562	-2.05532	0.00418326	0.0429373	0.01	0.05	0.03	0.08	0.05	0.1	FLJ21408	chr16	antisense	--
ENSG00000227373.5	4.51309	-3.43281	0.00808871	0.0706704	0.02	0.09	0.07	0	0	0	RP11-160H22.5	chr1	lincRNA	--
ENSG00000155629.14	-1.59094	3.30219	9.00278e-37	2.26121e-34	0.87	0.62	1.22	3.34	2.62	2.03	PIK3AP1	chr10	protein_coding	phosphoinositide-3-kinase adaptor protein 1
ENSG00000167100.14	2.05818	-2.1693	0.000260567	0.00449918	0.05	0.06	0.06	0.01	0.02	0.01	SAMD14	chr17	protein_coding	sterile alpha motif domain containing 14
ENSG00000091513.14	-2.20142	2.05806	8.16453e-45	2.68164e-42	0.58	0.19	0.66	3.82	1.69	0.97	TF	chr3	protein_coding	transferrin
ENSG00000170581.13	-1.01778	5.17811	6.45386e-21	8.49778e-19	6.02	5.61	8.88	13.6	14.08	12.82	STAT2	chr12	protein_coding	signal transducer and activator of transcription 2, 113kDa
ENSG00000131002.11	0.756194	0.75982	6.25886e-05	0.00131833	0.21	0.23	0.26	0.13	0.12	0.15	TXLNGY	chrY	transcribed_unprocessed_pseudogene	taxilin gamma pseudogene, Y-linked
ENSG00000100867.14	-0.735856	3.13292	2.57024e-09	1.30427e-07	3.61	3.77	3.64	5.47	6.54	5.86	DHRS2	chr14	protein_coding	dehydrogenase/reductase (SDR family) member 2
ENSG00000142347.16	-0.597458	0.949662	0.000971995	0.0133757	0.38	0.33	0.29	0.5	0.56	0.43	MYO1F	chr19	protein_coding	myosin IF
ENSG00000215417.10	0.985172	0.412408	1.76914e-06	5.57194e-05	0.53	0.65	0.6	0.24	0.33	0.31	MIR17HG	chr13	processed_transcript	miR-17-92 cluster host gene
ENSG00000183726.10	-0.639353	6.77957	8.82474e-10	4.76808e-08	30.04	29.66	33.5	50.21	47.47	43.99	TMEM50A	chr1	protein_coding	transmembrane protein 50A
ENSG00000196502.11	-0.655556	3.85766	1.2623e-08	5.84038e-07	4.2	4.09	4.08	6.9	6.12	6.01	SULT1A1	chr16	protein_coding	sulfotransferase family, cytosolic, 1A, phenol-preferring, member 1
ENSG00000241217.3	4.51403	-3.43236	0.00808871	0.0706704	0	0	0.76	0	0	0	RN7SL809P	chr12	misc_RNA	RNA, 7SL, cytoplasmic 809, pseudogene
ENSG00000149927.17	-0.589791	2.32437	1.66356e-05	0.000414697	1.69	1.56	1.82	2.67	2.19	2.58	DOC2A	chr16	protein_coding	double C2-like domains, alpha
ENSG00000260236.1	0.808719	-0.213919	0.0011514	0.0152545	0.58	0.48	0.52	0.21	0.29	0.37	RP11-708J19.1	chr3	antisense	--
ENSG00000170500.12	0.648104	2.1869	3.49697e-06	0.000102875	0.36	0.4	0.39	0.24	0.24	0.23	LONRF2	chr2	protein_coding	LON peptidase N-terminal domain and ring finger 2
ENSG00000003400.14	-0.651395	3.68405	2.4691e-08	1.08557e-06	1.45	1.24	1.65	2.37	2.17	2.1	CASP10	chr2	protein_coding	caspase 10, apoptosis-related cysteine peptidase
ENSG00000224093.5	-1.52988	-1.92287	0.0016759	0.0206136	0.1	0.02	0.07	0.17	0.21	0.14	RP5-1033H22.2	chr1	antisense	--
ENSG00000229677.1	3.10456	-3.16963	0.00671615	0.0617468	0.05	0.24	0.26	0	0	0.05	RP11-383F6.1	chr7	processed_pseudogene	--
ENSG00000256043.2	-1.28648	0.57213	3.61329e-10	2.03386e-08	0.25	0.24	0.33	0.79	0.68	0.48	CTSO	chr4	protein_coding	cathepsin O
ENSG00000163121.9	-1.36959	1.07524	2.91504e-14	2.55506e-12	0.54	0.66	0.42	1.19	1.49	1.4	NEURL3	chr2	protein_coding	neuralized E3 ubiquitin protein ligase 3
ENSG00000180389.6	1.10581	-1.09561	0.00113835	0.0151196	1.86	1.19	1.25	0.75	0.86	0.33	ATP5EP2	chr13	protein_coding	ATP synthase, H+ transporting, mitochondrial F1 complex, epsilon subunit pseudogene 2
ENSG00000259001.3	-0.894765	3.13853	5.70953e-13	4.44406e-11	13.3	6.34	8.21	15.56	15.86	19.03	RPPH1	chr14	antisense	ribonuclease P RNA component H1
ENSG00000265972.5	-0.988196	2.05001	8.48622e-12	5.73856e-10	0.87	0.87	0.73	1.79	1.4	1.6	TXNIP	chr1	protein_coding	thioredoxin interacting protein
ENSG00000273760.1	0.875898	0.0202485	0.000178715	0.00326704	1.17	2.16	1.06	0.93	0.77	0.64	CH17-360D5.3	chr10	lincRNA	--
ENSG00000156966.6	-0.974188	1.78032	1.61906e-10	9.45157e-09	0.61	0.44	0.74	1.08	1.17	1.16	B3GNT7	chr2	protein_coding	UDP-GlcNAc:betaGal beta-1,3-N-acetylglucosaminyltransferase 7
ENSG00000132000.11	-1.31881	-1.23269	0.000355266	0.00584078	0.02	0.1	0.07	0.17	0.1	0.17	PODNL1	chr19	protein_coding	podocan-like 1
ENSG00000165923.15	-0.985995	0.745589	2.55585e-07	9.56094e-06	0.27	0.24	0.29	0.58	0.54	0.43	AGBL2	chr11	protein_coding	ATP/GTP binding protein-like 2
ENSG00000007171.16	-0.800991	0.0693959	0.000493272	0.00768286	0.16	0.17	0.17	0.25	0.35	0.25	NOS2	chr17	protein_coding	nitric oxide synthase 2, inducible
ENSG00000170608.2	-0.736524	2.3268	8.96049e-08	3.66877e-06	2.06	1.45	1.92	2.81	3.39	2.63	FOXA3	chr19	protein_coding	forkhead box A3
ENSG00000173702.7	-1.3294	4.90557	1.97335e-33	4.43469e-31	6.13	3.72	7.35	17.15	13.36	11.79	MUC13	chr3	protein_coding	mucin 13, cell surface associated
ENSG00000162366.7	-1.2746	4.03283	1.6093e-28	3.00627e-26	6.48	8.84	7.99	15.96	19.21	19.67	PDZK1IP1	chr1	protein_coding	PDZK1 interacting protein 1
ENSG00000242599.7	-4.44959	-3.43348	0.00808871	0.0706704	0	0	0	0.14	0.13	0	CSAG4	chrX	transcribed_unprocessed_pseudogene	CSAG family, member 4 (pseudogene)
ENSG00000123838.10	-0.892347	0.476739	1.46145e-05	0.000369553	0.41	0.3	0.5	0.85	0.68	0.67	C4BPA	chr1	protein_coding	complement component 4 binding protein, alpha
ENSG00000205220.11	-1.62241	4.05493	3.01601e-43	9.39015e-41	6.13	5.54	7.72	18.42	19.85	19.86	PSMB10	chr16	protein_coding	proteasome (prosome, macropain) subunit, beta type, 10
ENSG00000109063.14	-0.650148	0.254519	0.00242842	0.0277777	0.13	0.15	0.14	0.2	0.22	0.24	MYH3	chr17	protein_coding	myosin, heavy chain 3, skeletal muscle, embryonic
ENSG00000173918.14	-0.969939	5.58232	1.30765e-19	1.60182e-17	6.54	7.43	7.67	12.42	13.91	14.9	C1QTNF1	chr17	protein_coding	C1q and tumor necrosis factor related protein 1
ENSG00000234327.7	0.689255	2.91726	4.70588e-08	1.98664e-06	11.65	10.53	9.36	5.67	6.16	7.2	AC012146.7	chr17	processed_transcript	--
ENSG00000123243.14	-0.695331	1.34311	2.18992e-05	0.000529139	0.25	0.2	0.25	0.42	0.36	0.33	ITIH5	chr10	protein_coding	inter-alpha-trypsin inhibitor heavy chain family, member 5
ENSG00000145451.12	-4.75814	-3.29611	0.002065	0.0242138	0	0	0	0.01	0.02	0	GLRA3	chr4	protein_coding	glycine receptor, alpha 3
ENSG00000112773.15	-1.14758	3.07816	9.49245e-20	1.16757e-17	0.75	0.67	1.23	2.19	1.82	1.71	FAM46A	chr6	protein_coding	family with sequence similarity 46, member A
ENSG00000272894.5	1.08035	-1.15418	0.00176751	0.0214839	0.33	0.41	0.25	0.13	0.1	0.22	RP5-1159O4.1	chr7	lincRNA	--
ENSG00000147168.12	-2.39109	0.982907	1.00999e-32	2.20348e-30	0.29	0.4	0.46	2.1	1.69	2.13	IL2RG	chrX	protein_coding	interleukin 2 receptor, gamma
ENSG00000074410.13	-0.593408	9.09445	7.97023e-09	3.79335e-07	66.01	59.74	72.08	108.64	97.41	85.6	CA12	chr15	protein_coding	carbonic anhydrase XII
ENSG00000272150.5	1.07974	0.072843	3.15107e-06	9.39006e-05	0.29	0.48	0.27	0.15	0.15	0.18	NBPF25P	chr1	transcribed_unprocessed_pseudogene	neuroblastoma breakpoint family, member 25, pseudogene
ENSG00000141665.11	-0.767904	-0.337281	0.00357649	0.037907	0.4	0.11	0.41	0.51	0.4	0.62	FBXO15	chr18	protein_coding	F-box protein 15
ENSG00000275645.1	2.05273	-2.70997	0.00794518	0.0700719	0.73	0.19	0.2	0.13	0.06	0.06	RP11-817O13.9	chr15	antisense	--
ENSG00000161544.9	-0.992395	1.00689	3.50783e-08	1.51292e-06	0.43	0.41	0.59	0.72	0.97	1.06	CYGB	chr17	protein_coding	cytoglobin
ENSG00000184985.16	-0.605877	0.243467	0.00480565	0.0475932	0.19	0.12	0.11	0.21	0.21	0.21	SORCS2	chr4	protein_coding	sortilin-related VPS10 domain containing receptor 2
ENSG00000142178.7	-0.984242	-1.38171	0.00784079	0.0695617	0.02	0.09	0.02	0.09	0.12	0.05	SIK1	chr21	protein_coding	salt-inducible kinase 1
ENSG00000123342.15	-0.925817	-1.0829	0.00656604	0.0608724	0.13	0.09	0.13	0.16	0.13	0.36	MMP19	chr12	protein_coding	matrix metallopeptidase 19
ENSG00000204396.10	-0.974732	-0.499545	0.000397374	0.00640394	0.2	0.16	0.08	0.3	0.29	0.26	VWA7	chr6	protein_coding	von Willebrand factor A domain containing 7
ENSG00000185966.3	1.57218	-1.97353	0.00248335	0.0282438	0.36	0.88	0.19	0.17	0.08	0.21	LCE3E	chr1	protein_coding	late cornified envelope 3E
ENSG00000136689.18	-1.9313	-1.56643	6.72278e-06	0.000185195	0.05	0.05	0.05	0.16	0.18	0.21	IL1RN	chr2	protein_coding	interleukin 1 receptor antagonist
ENSG00000232653.8	0.690497	0.508789	0.000571128	0.00866139	0.28	0.33	0.31	0.21	0.2	0.15	GOLGA8N	chr15	protein_coding	golgin A8 family, member N
ENSG00000134627.11	-1.58236	-2.11171	0.00317312	0.0344752	0.02	0.01	0.05	0.06	0.09	0.07	PIWIL4	chr11	protein_coding	piwi-like RNA-mediated gene silencing 4
ENSG00000122643.18	-1.43146	6.90551	1.06485e-41	3.06031e-39	23.78	21.43	34.27	87.38	69.63	52.92	NT5C3A	chr7	protein_coding	5'-nucleotidase, cytosolic IIIA
ENSG00000196954.12	-1.14354	4.48347	1.57746e-24	2.57643e-22	5.74	5.48	6.68	13.86	13.32	11.42	CASP4	chr11	protein_coding	caspase 4, apoptosis-related cysteine peptidase
ENSG00000145192.12	-1.28987	0.0883638	3.42113e-08	1.4798e-06	0.4	0.13	0.46	1.12	0.71	0.53	AHSG	chr3	protein_coding	alpha-2-HS-glycoprotein
ENSG00000277938.1	0.689541	0.0802048	0.00248654	0.0282694	0.39	0.37	0.55	0.23	0.29	0.26	RP5-965G21.3	chr20	lincRNA	--
ENSG00000183091.19	-1.35922	0.264827	1.78818e-09	9.27896e-08	0.03	0.01	0.03	0.1	0.05	0.03	NEB	chr2	protein_coding	nebulin
ENSG00000183760.10	-2.99264	-2.05543	5.87083e-07	2.05954e-05	0	0.01	0.03	0.09	0.07	0.15	PAPL	chr19	protein_coding	--
ENSG00000178078.11	-1.98443	-2.29644	0.00108544	0.014581	0.09	0.02	0	0.12	0.19	0.11	STAP2	chr19	protein_coding	signal transducing adaptor family member 2
ENSG00000187550.8	-0.926625	-0.885779	0.00308365	0.0336499	0.25	0.32	0.31	0.36	0.6	0.67	SBK2	chr19	protein_coding	SH3 domain binding kinase family, member 2
ENSG00000103647.12	1.34224	0.16642	3.32611e-09	1.66523e-07	0.43	0.43	0.27	0.15	0.12	0.16	CORO2B	chr15	protein_coding	coronin, actin binding protein, 2B
ENSG00000105699.16	-0.719647	5.7401	1.25343e-11	8.28842e-10	14.35	14.77	17.1	23.03	25.51	25.57	LSR	chr19	protein_coding	lipolysis stimulated lipoprotein receptor
ENSG00000100234.11	-1.16834	-1.21697	0.00130897	0.0169735	0.04	0.04	0.07	0.09	0.14	0.09	TIMP3	chr22	protein_coding	TIMP metallopeptidase inhibitor 3
ENSG00000067113.16	-0.704346	5.23386	6.16163e-11	3.82085e-09	16.72	13.44	16.49	26.93	26.19	21.14	PPAP2A	chr5	protein_coding	phosphatidic acid phosphatase type 2A
ENSG00000126262.4	-3.17494	-2.58588	4.53076e-05	0.000992815	0.01	0	0.01	0.05	0.13	0.08	FFAR2	chr19	protein_coding	free fatty acid receptor 2
ENSG00000078900.14	-2.30221	-2.75565	0.00288816	0.0320075	0	0.01	0	0.04	0.02	0.02	TP73	chr1	protein_coding	tumor protein p73
ENSG00000163596.16	0.800808	0.587293	4.99412e-05	0.00108088	0.19	0.21	0.19	0.12	0.1	0.11	ICA1L	chr2	protein_coding	islet cell autoantigen 1,69kDa-like
ENSG00000234753.5	1.43925	-0.221245	2.94319e-08	1.28798e-06	1.57	1.72	1.38	0.46	0.58	0.62	FOXP4-AS1	chr6	antisense	FOXP4 antisense RNA 1
ENSG00000260401.1	0.625292	2.1699	8.09457e-06	0.000216985	1.61	1.7	1.37	1.01	0.96	0.99	RP11-800A3.4	chr11	sense_overlapping	--
ENSG00000180525.11	-0.985409	-0.112592	6.61243e-05	0.00137536	0.08	0.03	0.07	0.16	0.11	0.08	PRR26	chr10	protein_coding	proline rich 26
ENSG00000237491.8	1.17728	-1.77673	0.00988387	0.0821521	0.08	0.06	0.1	0.03	0.04	0.03	RP11-206L10.9	chr1	lincRNA	--
ENSG00000095539.15	-0.592097	3.72884	3.62506e-07	1.31627e-05	2.62	1.82	2.54	3.91	3.18	3.18	SEMA4G	chr10	protein_coding	sema domain, immunoglobulin domain (Ig), transmembrane domain (TM) and short cytoplasmic domain, (semaphorin) 4G
ENSG00000166278.14	-2.87906	-0.0727303	5.56927e-24	8.80741e-22	0.07	0.01	0.07	0.46	0.32	0.35	C2	chr6	protein_coding	complement component 2
ENSG00000124256.14	-3.31855	0.52789	8.17647e-40	2.26284e-37	0.02	0.13	0.13	0.81	0.95	0.99	ZBP1	chr20	protein_coding	Z-DNA binding protein 1
ENSG00000266469.1	1.02279	-1.4323	0.00688606	0.0629796	0.7	0.41	0.33	0.25	0.29	0.15	CTB-131K11.1	chr17	antisense	--
ENSG00000167772.11	-0.995372	5.95165	7.36112e-21	9.64984e-19	20.07	19.23	24.7	37.4	40.61	46.14	ANGPTL4	chr19	protein_coding	angiopoietin-like 4
ENSG00000175155.8	-0.948024	0.882042	3.12678e-07	1.15236e-05	0.23	0.21	0.22	0.54	0.36	0.34	YPEL2	chr17	protein_coding	yippee-like 2 (Drosophila)
ENSG00000108387.14	-1.41966	1.35078	8.27583e-17	8.55904e-15	0.38	0.42	0.68	1.2	1.39	1.28	SEPT4	chr17	protein_coding	septin 4
ENSG00000236345.1	-1.96908	-1.87388	6.40844e-05	0.00134227	0.04	0.13	0	0.18	0.28	0.21	RP11-59D5__B.2	chr6	antisense	--
