# Supplementary material for: RNA-binding protein CELF6 modulates transcription and splicing levels of genes associated with tumorigenesis in lung cancer A549 cells
Source: PeerJ. 2022 Jul 26;10:e13800. doi: 10.7717/peerj.13800 (PMC9336609; doi:10.7717/peerj.13800)
Supplement: Supplemental Information 7 [file peerj-10-13800-s007.xls]

## Sheet: Up_GO_enrichment_P
#fg	79
#bg	14960
##Statistical test method: hypergeometric test
##FDR correction method: Benjamini and Hochberg
#Term	Database	ID	Input number	Background number	P-Value	Corrected P-Value	Input	Hyperlink
--------------------
#Term	Database	ID	Input number	Background number	P-Value	Corrected P-Value	Input	Hyperlink
--------------------
#Term	Database	ID	Input number	Background number	P-Value	Corrected P-Value	Input	Hyperlink
synaptic transmission	Gene Ontology	GO:0007268	10	389	3.66738e-05	0.000733477	KCNJ14|KCNMA1|KCNAB3|GRIN2B|SNCB|FGF12|KCNB1|GLS|CACNG4|MYO5A	http://amigo.geneontology.org/amigo/term/GO:0007268
nervous system development	Gene Ontology	GO:0007399	7	278	0.000656999	0.00656999	DPYSL5|NOG|DCLK1|ST8SIA2|SPOCK1|FGF12|VPS13A	http://amigo.geneontology.org/amigo/term/GO:0007399
transport	Gene Ontology	GO:0006810	7	349	0.00243418	0.0162279	SERPINA6|CACNG4|GRIN2B|SLC25A27|MYO5A|AFP|TTPA	http://amigo.geneontology.org/amigo/term/GO:0006810
intracellular signal transduction	Gene Ontology	GO:0035556	7	379	0.00384183	0.0192092	ASB2|PREX1|DCLK1|PRKAR2A|PRKAR2B|GUCY1B3|KSR2	http://amigo.geneontology.org/amigo/term/GO:0035556
axon guidance	Gene Ontology	GO:0007411	6	334	0.00839999	0.0244407	ITGA9|DPYSL5|ST8SIA2|TUBB3|CDK5R1|SLIT3	http://amigo.geneontology.org/amigo/term/GO:0007411
signal transduction	Gene Ontology	GO:0007165	12	1045	0.00840113	0.0244407	ASB2|SORL1|DPYSL5|AMHR2|ARHGAP33|PRKAR2A|PRKAR2B|HUNK|APLN|FGF12|KCNIP3|SPOCK1	http://amigo.geneontology.org/amigo/term/GO:0007165
cell adhesion	Gene Ontology	GO:0007155	7	445	0.00904236	0.0244407	ITGA9|CTNNAL1|GP1BB|SPOCK1|TNC|LPP|ITGAE	http://amigo.geneontology.org/amigo/term/GO:0007155
negative regulation of transcription from RNA polymerase II promoter	Gene Ontology	GO:0000122	8	565	0.0097763	0.0244407	FOXD4|NOG|OSR1|SALL4|SNAI2|TAF9B|KCNIP3|DLX2	http://amigo.geneontology.org/amigo/term/GO:0000122
small molecule metabolic process	Gene Ontology	GO:0044281	14	1413	0.0152663	0.033925	CYP1A1|MT-ND6|MGAM|CERK|PRKAR2A|ALOX5AP|OXCT1|CYP26A1|PRKAR2B|B3GAT2|KCNB1|GLS|ODC1|B4GALT6	http://amigo.geneontology.org/amigo/term/GO:0044281
cellular protein metabolic process	Gene Ontology	GO:0044267	7	530	0.0217318	0.0434635	PGAP1|TUBB3|ST8SIA2|MGAT4A|MYO5A|MMP2|B4GALT6	http://amigo.geneontology.org/amigo/term/GO:0044267
extracellular matrix organization	Gene Ontology	GO:0030198	5	312	0.0245889	0.0447072	ITGA9|MMP2|ITGAE|TNC|CRISPLD2	http://amigo.geneontology.org/amigo/term/GO:0030198
transmembrane transport	Gene Ontology	GO:0055085	7	578	0.0327702	0.052609	SLC9A2|SLC7A11|SLC16A7|PRKAR2A|PRKAR2B|SLC4A8|BCL2	http://amigo.geneontology.org/amigo/term/GO:0055085
blood coagulation	Gene Ontology	GO:0007596	6	469	0.037452	0.052609	KCNMA1|SLC7A11|PRKAR2A|PRKAR2B|GUCY1B3|GP1BB	http://amigo.geneontology.org/amigo/term/GO:0007596
carbohydrate metabolic process	Gene Ontology	GO:0005975	5	354	0.0392067	0.052609	B3GAT2|MGAM|MGAT4A|ST8SIA2|B4GALT6	http://amigo.geneontology.org/amigo/term/GO:0005975
negative regulation of apoptotic process	Gene Ontology	GO:0043066	6	475	0.0394568	0.052609	OSR1|HSPA1A|SLC25A27|TAF9B|SYCP2|BCL2	http://amigo.geneontology.org/amigo/term/GO:0043066
protein transport	Gene Ontology	GO:0015031	5	402	0.0613242	0.0766553	SFT2D2|MYO5A|ARHGAP33|VPS13A|RAB3B	http://amigo.geneontology.org/amigo/term/GO:0015031
positive regulation of cell proliferation	Gene Ontology	GO:0008284	5	429	0.0763528	0.0898268	SLC25A27|BNC1|ODC1|TNC|APLN	http://amigo.geneontology.org/amigo/term/GO:0008284
positive regulation of transcription from RNA polymerase II promoter	Gene Ontology	GO:0045944	7	749	0.100122	0.111247	ETV2|FOXD4|NOG|OSR1|RORA|SALL4|DLX2	http://amigo.geneontology.org/amigo/term/GO:0045944
transcription, DNA-dependent	Gene Ontology	GO:0006351	11	1857	0.390792	0.41136	BNC1|YY2|ZNF714|TSHZ3|OSR1|RORA|SALL4|KHDRBS3|ZFP82|MYBL1|KCNIP3	http://amigo.geneontology.org/amigo/term/GO:0006351
regulation of transcription, DNA-dependent	Gene Ontology	GO:0006355	6	1305	0.697253	0.697253	YY2|ZNF714|RORA|KHDRBS3|ZFP82|MYBL1	http://amigo.geneontology.org/amigo/term/GO:0006355
--------------------
