# Supplementary material for: RNA-binding protein CELF6 modulates transcription and splicing levels of genes associated with tumorigenesis in lung cancer A549 cells
Source: PeerJ. 2022 Jul 26;10:e13800. doi: 10.7717/peerj.13800 (PMC9336609; doi:10.7717/peerj.13800)
Supplement: Supplemental Information 8 [file peerj-10-13800-s008.xls]

## Sheet: Up_KEGG_pathway
Term	Database	ID	Input number	Background number	P-Value	Corrected P-Value	Input	Hyperlink	img
MAPK signaling pathway	KEGG PATHWAY	hsa04010	7	255	0.00418113	0.364096	HSPA6|JMJD7-PLA2G4B|GADD45G|HSPA1B|HSPA1A|FGF12|CACNG4	http://www.genome.jp/kegg-bin/show_pathway?hsa04010/hsa:3304%09red/hsa:2257%09red/hsa:27092%09red/hsa:3310%09red/hsa:8681%09red/hsa:10912%09red/hsa:3303%09red	img/hsa04010.html
Estrogen signaling pathway	KEGG PATHWAY	hsa04915	4	99	0.00815391	0.364096	HSPA1B|HSPA1A|MMP2|HSPA6	http://www.genome.jp/kegg-bin/show_pathway?hsa04915/hsa:3304%09red/hsa:4313%09red/hsa:3310%09red/hsa:3303%09red	img/hsa04915.html
Legionellosis	KEGG PATHWAY	hsa05134	3	55	0.00973955	0.364096	HSPA1B|HSPA1A|HSPA6	http://www.genome.jp/kegg-bin/show_pathway?hsa05134/hsa:3304%09red/hsa:3310%09red/hsa:3303%09red	img/hsa05134.html
Protein processing in endoplasmic reticulum	KEGG PATHWAY	hsa04141	5	166	0.0105947	0.364096	HSPA1B|DNAJB1|HSPA6|HSPA1A|BCL2	http://www.genome.jp/kegg-bin/show_pathway?hsa04141/hsa:3304%09red/hsa:596%09red/hsa:3337%09red/hsa:3310%09red/hsa:3303%09red	img/hsa04141.html
Longevity regulating pathway - multiple species	KEGG PATHWAY	hsa04213	3	64	0.0146988	0.364096	HSPA1B|HSPA1A|HSPA6	http://www.genome.jp/kegg-bin/show_pathway?hsa04213/hsa:3304%09red/hsa:3310%09red/hsa:3303%09red	img/hsa04213.html
Toxoplasmosis	KEGG PATHWAY	hsa05145	4	119	0.0152768	0.364096	HSPA1B|HSPA1A|HSPA6|BCL2	http://www.genome.jp/kegg-bin/show_pathway?hsa05145/hsa:3304%09red/hsa:596%09red/hsa:3310%09red/hsa:3303%09red	img/hsa05145.html
Antigen processing and presentation	KEGG PATHWAY	hsa04612	3	78	0.0248003	0.504568	HSPA1B|HSPA1A|HSPA6	http://www.genome.jp/kegg-bin/show_pathway?hsa04612/hsa:3304%09red/hsa:3310%09red/hsa:3303%09red	img/hsa04612.html
ECM-receptor interaction	KEGG PATHWAY	hsa04512	3	82	0.0282276	0.504568	ITGA9|TNC|GP1BB	http://www.genome.jp/kegg-bin/show_pathway?hsa04512/hsa:3371%09red/hsa:3680%09red/hsa:2812%09red	img/hsa04512.html
Salivary secretion	KEGG PATHWAY	hsa04970	3	89	0.034802	0.532119	BEST2|KCNMA1|GUCY1B3	http://www.genome.jp/kegg-bin/show_pathway?hsa04970/hsa:54831%09red/hsa:3778%09red/hsa:2983%09red	img/hsa04970.html
Oxytocin signaling pathway	KEGG PATHWAY	hsa04921	4	158	0.0382053	0.532119	JMJD7-PLA2G4B|KCNJ14|CACNG4|GUCY1B3	http://www.genome.jp/kegg-bin/show_pathway?hsa04921/hsa:27092%09red/hsa:8681%09red/hsa:2983%09red/hsa:3770%09red	img/hsa04921.html
Influenza A	KEGG PATHWAY	hsa05164	4	176	0.0531436	0.532119	HSPA1B|DNAJB1|HSPA1A|HSPA6	http://www.genome.jp/kegg-bin/show_pathway?hsa05164/hsa:3304%09red/hsa:3337%09red/hsa:3310%09red/hsa:3303%09red	img/hsa05164.html
Sphingolipid metabolism	KEGG PATHWAY	hsa00600	2	47	0.054971	0.532119	CERK|B4GALT6	http://www.genome.jp/kegg-bin/show_pathway?hsa00600/hsa:9331%09red/hsa:64781%09red	img/hsa00600.html
Cocaine addiction	KEGG PATHWAY	hsa05030	2	49	0.059198	0.532119	GRIN2B|CDK5R1	http://www.genome.jp/kegg-bin/show_pathway?hsa05030/hsa:8851%09red/hsa:2904%09red	img/hsa05030.html
Ovarian steroidogenesis	KEGG PATHWAY	hsa04913	2	50	0.0613526	0.532119	JMJD7-PLA2G4B|CYP1A1	http://www.genome.jp/kegg-bin/show_pathway?hsa04913/hsa:8681%09red/hsa:1543%09red	img/hsa04913.html
Amyotrophic lateral sclerosis (ALS)	KEGG PATHWAY	hsa05014	2	51	0.063534	0.532119	GRIN2B|BCL2	http://www.genome.jp/kegg-bin/show_pathway?hsa05014/hsa:596%09red/hsa:2904%09red	img/hsa05014.html
Glutamatergic synapse	KEGG PATHWAY	hsa04724	3	114	0.064088	0.532119	JMJD7-PLA2G4B|GRIN2B|GLS	http://www.genome.jp/kegg-bin/show_pathway?hsa04724/hsa:2904%09red/hsa:2744%09red/hsa:8681%09red	img/hsa04724.html
Vascular smooth muscle contraction	KEGG PATHWAY	hsa04270	3	120	0.0723958	0.532119	JMJD7-PLA2G4B|KCNMA1|GUCY1B3	http://www.genome.jp/kegg-bin/show_pathway?hsa04270/hsa:8681%09red/hsa:2983%09red/hsa:3778%09red	img/hsa04270.html
Platelet activation	KEGG PATHWAY	hsa04611	3	122	0.0752684	0.532119	JMJD7-PLA2G4B|GP1BB|GUCY1B3	http://www.genome.jp/kegg-bin/show_pathway?hsa04611/hsa:8681%09red/hsa:2983%09red/hsa:2812%09red	img/hsa04611.html
Synthesis and degradation of ketone bodies	KEGG PATHWAY	hsa00072	1	10	0.0779454	0.532119	OXCT1	http://www.genome.jp/kegg-bin/show_pathway?hsa00072/hsa:5019%09red	img/hsa00072.html
Epstein-Barr virus infection	KEGG PATHWAY	hsa05169	4	201	0.0784773	0.532119	HSPA1B|HSPA1A|HSPA6|BCL2	http://www.genome.jp/kegg-bin/show_pathway?hsa05169/hsa:3304%09red/hsa:596%09red/hsa:3310%09red/hsa:3303%09red	img/hsa05169.html
Long-term depression	KEGG PATHWAY	hsa04730	2	60	0.0842794	0.532119	JMJD7-PLA2G4B|GUCY1B3	http://www.genome.jp/kegg-bin/show_pathway?hsa04730/hsa:8681%09red/hsa:2983%09red	img/hsa04730.html
Spliceosome	KEGG PATHWAY	hsa03040	3	134	0.0935385	0.532119	HSPA1B|HSPA1A|HSPA6	http://www.genome.jp/kegg-bin/show_pathway?hsa03040/hsa:3304%09red/hsa:3310%09red/hsa:3303%09red	img/hsa03040.html
Renin secretion	KEGG PATHWAY	hsa04924	2	64	0.09408	0.532119	KCNMA1|GUCY1B3	http://www.genome.jp/kegg-bin/show_pathway?hsa04924/hsa:3778%09red/hsa:2983%09red	img/hsa04924.html
Retinol metabolism	KEGG PATHWAY	hsa00830	2	65	0.0965803	0.532119	CYP1A1|CYP26A1	http://www.genome.jp/kegg-bin/show_pathway?hsa00830/hsa:1592%09red/hsa:1543%09red	img/hsa00830.html
Systemic lupus erythematosus	KEGG PATHWAY	hsa05322	3	136	0.0967488	0.532119	GRIN2B|HIST1H3C|HIST1H4C	http://www.genome.jp/kegg-bin/show_pathway?hsa05322/hsa:8352%09red/hsa:2904%09red/hsa:8364%09red	img/hsa05322.html
Measles	KEGG PATHWAY	hsa05162	3	136	0.0967488	0.532119	HSPA1B|HSPA1A|HSPA6	http://www.genome.jp/kegg-bin/show_pathway?hsa05162/hsa:3304%09red/hsa:3310%09red/hsa:3303%09red	img/hsa05162.html
Ras signaling pathway	KEGG PATHWAY	hsa04014	4	228	0.11151	0.59059	JMJD7-PLA2G4B|GRIN2B|KSR2|FGF12	http://www.genome.jp/kegg-bin/show_pathway?hsa04014/hsa:2904%09red/hsa:2257%09red/hsa:283455%09red/hsa:8681%09red	img/hsa04014.html
Arrhythmogenic right ventricular cardiomyopathy (ARVC)	KEGG PATHWAY	hsa05412	2	74	0.119888	0.612283	ITGA9|CACNG4	http://www.genome.jp/kegg-bin/show_pathway?hsa05412/hsa:3680%09red/hsa:27092%09red	img/hsa05412.html
2-Oxocarboxylic acid metabolism	KEGG PATHWAY	hsa01210	1	18	0.135976	0.620861	ACO1	http://www.genome.jp/kegg-bin/show_pathway?hsa01210/hsa:48%09red	img/hsa01210.html
Hypertrophic cardiomyopathy (HCM)	KEGG PATHWAY	hsa05410	2	83	0.144427	0.620861	ITGA9|CACNG4	http://www.genome.jp/kegg-bin/show_pathway?hsa05410/hsa:3680%09red/hsa:27092%09red	img/hsa05410.html
TGF-beta signaling pathway	KEGG PATHWAY	hsa04350	2	84	0.147218	0.620861	NOG|AMHR2	http://www.genome.jp/kegg-bin/show_pathway?hsa04350/hsa:269%09red/hsa:9241%09red	img/hsa04350.html
Arginine biosynthesis	KEGG PATHWAY	hsa00220	1	21	0.156799	0.620861	GLS	http://www.genome.jp/kegg-bin/show_pathway?hsa00220/hsa:2744%09red	img/hsa00220.html
Gap junction	KEGG PATHWAY	hsa04540	2	88	0.158488	0.620861	TUBB3|GUCY1B3	http://www.genome.jp/kegg-bin/show_pathway?hsa04540/hsa:10381%09red/hsa:2983%09red	img/hsa04540.html
Dilated cardiomyopathy	KEGG PATHWAY	hsa05414	2	90	0.164184	0.620861	ITGA9|CACNG4	http://www.genome.jp/kegg-bin/show_pathway?hsa05414/hsa:3680%09red/hsa:27092%09red	img/hsa05414.html
GnRH signaling pathway	KEGG PATHWAY	hsa04912	2	91	0.167047	0.620861	JMJD7-PLA2G4B|MMP2	http://www.genome.jp/kegg-bin/show_pathway?hsa04912/hsa:4313%09red/hsa:8681%09red	img/hsa04912.html
Proximal tubule bicarbonate reclamation	KEGG PATHWAY	hsa04964	1	23	0.170407	0.620861	GLS	http://www.genome.jp/kegg-bin/show_pathway?hsa04964/hsa:2744%09red	img/hsa04964.html
Alcoholism	KEGG PATHWAY	hsa05034	3	179	0.175309	0.620861	GRIN2B|HIST1H3C|HIST1H4C	http://www.genome.jp/kegg-bin/show_pathway?hsa05034/hsa:8352%09red/hsa:2904%09red/hsa:8364%09red	img/hsa05034.html
Circadian entrainment	KEGG PATHWAY	hsa04713	2	95	0.178582	0.620861	GRIN2B|GUCY1B3	http://www.genome.jp/kegg-bin/show_pathway?hsa04713/hsa:2904%09red/hsa:2983%09red	img/hsa04713.html
Glycerophospholipid metabolism	KEGG PATHWAY	hsa00564	2	95	0.178582	0.620861	JMJD7-PLA2G4B|PNPLA7	http://www.genome.jp/kegg-bin/show_pathway?hsa00564/hsa:375775%09red/hsa:8681%09red	img/hsa00564.html
Glycosylphosphatidylinositol(GPI)-anchor biosynthesis	KEGG PATHWAY	hsa00563	1	25	0.183799	0.620861	PGAP1	http://www.genome.jp/kegg-bin/show_pathway?hsa00563/hsa:80055%09red	img/hsa00563.html
alpha-Linolenic acid metabolism	KEGG PATHWAY	hsa00592	1	25	0.183799	0.620861	JMJD7-PLA2G4B	http://www.genome.jp/kegg-bin/show_pathway?hsa00592/hsa:8681%09red	img/hsa00592.html
Endocrine resistance	KEGG PATHWAY	hsa01522	2	97	0.184397	0.620861	MMP2|BCL2	http://www.genome.jp/kegg-bin/show_pathway?hsa01522/hsa:4313%09red/hsa:596%09red	img/hsa01522.html
AGE-RAGE signaling pathway in diabetic complications	KEGG PATHWAY	hsa04933	2	101	0.19611	0.620861	MMP2|BCL2	http://www.genome.jp/kegg-bin/show_pathway?hsa04933/hsa:4313%09red/hsa:596%09red	img/hsa04933.html
Butanoate metabolism	KEGG PATHWAY	hsa00650	1	28	0.203489	0.620861	OXCT1	http://www.genome.jp/kegg-bin/show_pathway?hsa00650/hsa:5019%09red	img/hsa00650.html
Glyoxylate and dicarboxylate metabolism	KEGG PATHWAY	hsa00630	1	28	0.203489	0.620861	ACO1	http://www.genome.jp/kegg-bin/show_pathway?hsa00630/hsa:48%09red	img/hsa00630.html
Linoleic acid metabolism	KEGG PATHWAY	hsa00591	1	29	0.209948	0.620861	JMJD7-PLA2G4B	http://www.genome.jp/kegg-bin/show_pathway?hsa00591/hsa:8681%09red	img/hsa00591.html
Citrate cycle (TCA cycle)	KEGG PATHWAY	hsa00020	1	30	0.216356	0.620861	ACO1	http://www.genome.jp/kegg-bin/show_pathway?hsa00020/hsa:48%09red	img/hsa00020.html
Galactose metabolism	KEGG PATHWAY	hsa00052	1	31	0.222712	0.620861	MGAM	http://www.genome.jp/kegg-bin/show_pathway?hsa00052/hsa:8972%09red	img/hsa00052.html
Circadian rhythm	KEGG PATHWAY	hsa04710	1	31	0.222712	0.620861	RORA	http://www.genome.jp/kegg-bin/show_pathway?hsa04710/hsa:6095%09red	img/hsa04710.html
Other types of O-glycan biosynthesis	KEGG PATHWAY	hsa00514	1	31	0.222712	0.620861	B3GAT2	http://www.genome.jp/kegg-bin/show_pathway?hsa00514/hsa:135152%09red	img/hsa00514.html
Focal adhesion	KEGG PATHWAY	hsa04510	3	203	0.225114	0.620861	ITGA9|TNC|BCL2	http://www.genome.jp/kegg-bin/show_pathway?hsa04510/hsa:3371%09red/hsa:3680%09red/hsa:596%09red	img/hsa04510.html
Cholinergic synapse	KEGG PATHWAY	hsa04725	2	111	0.225768	0.620861	KCNJ14|BCL2	http://www.genome.jp/kegg-bin/show_pathway?hsa04725/hsa:596%09red/hsa:3770%09red	img/hsa04725.html
Apoptosis - multiple species	KEGG PATHWAY	hsa04215	1	33	0.235274	0.634795	BCL2	http://www.genome.jp/kegg-bin/show_pathway?hsa04215/hsa:596%09red	img/hsa04215.html
Prion diseases	KEGG PATHWAY	hsa05020	1	35	0.247636	0.641006	HSPA1A	http://www.genome.jp/kegg-bin/show_pathway?hsa05020/hsa:3303%09red	img/hsa05020.html
Alanine, aspartate and glutamate metabolism	KEGG PATHWAY	hsa00250	1	35	0.247636	0.641006	GLS	http://www.genome.jp/kegg-bin/show_pathway?hsa00250/hsa:2744%09red	img/hsa00250.html
Regulation of actin cytoskeleton	KEGG PATHWAY	hsa04810	3	215	0.251023	0.641006	ITGA9|ITGAE|FGF12	http://www.genome.jp/kegg-bin/show_pathway?hsa04810/hsa:3680%09red/hsa:2257%09red/hsa:3682%09red	img/hsa04810.html
Nicotine addiction	KEGG PATHWAY	hsa05033	1	40	0.277688	0.681403	GRIN2B	http://www.genome.jp/kegg-bin/show_pathway?hsa05033/hsa:2904%09red	img/hsa05033.html
Tryptophan metabolism	KEGG PATHWAY	hsa00380	1	40	0.277688	0.681403	CYP1A1	http://www.genome.jp/kegg-bin/show_pathway?hsa00380/hsa:1543%09red	img/hsa00380.html
Bladder cancer	KEGG PATHWAY	hsa05219	1	41	0.283556	0.681403	MMP2	http://www.genome.jp/kegg-bin/show_pathway?hsa05219/hsa:4313%09red	img/hsa05219.html
PI3K-Akt signaling pathway	KEGG PATHWAY	hsa04151	4	341	0.296223	0.681403	ITGA9|FGF12|TNC|BCL2	http://www.genome.jp/kegg-bin/show_pathway?hsa04151/hsa:3371%09red/hsa:3680%09red/hsa:2257%09red/hsa:596%09red	img/hsa04151.html
Ether lipid metabolism	KEGG PATHWAY	hsa00565	1	45	0.306561	0.681403	JMJD7-PLA2G4B	http://www.genome.jp/kegg-bin/show_pathway?hsa00565/hsa:8681%09red	img/hsa00565.html
Basal transcription factors	KEGG PATHWAY	hsa03022	1	45	0.306561	0.681403	TAF9B	http://www.genome.jp/kegg-bin/show_pathway?hsa03022/hsa:51616%09red	img/hsa03022.html
Insulin signaling pathway	KEGG PATHWAY	hsa04910	2	139	0.309869	0.681403	PRKAR2A|PRKAR2B	http://www.genome.jp/kegg-bin/show_pathway?hsa04910/hsa:5577%09red/hsa:5576%09red	img/hsa04910.html
Carbohydrate digestion and absorption	KEGG PATHWAY	hsa04973	1	46	0.312198	0.681403	MGAM	http://www.genome.jp/kegg-bin/show_pathway?hsa04973/hsa:8972%09red	img/hsa04973.html
Apoptosis	KEGG PATHWAY	hsa04210	2	140	0.312863	0.681403	GADD45G|BCL2	http://www.genome.jp/kegg-bin/show_pathway?hsa04210/hsa:596%09red/hsa:10912%09red	img/hsa04210.html
Hedgehog signaling pathway	KEGG PATHWAY	hsa04340	1	47	0.31779	0.681403	BCL2	http://www.genome.jp/kegg-bin/show_pathway?hsa04340/hsa:596%09red	img/hsa04340.html
Valine, leucine and isoleucine degradation	KEGG PATHWAY	hsa00280	1	48	0.323337	0.681403	OXCT1	http://www.genome.jp/kegg-bin/show_pathway?hsa00280/hsa:5019%09red	img/hsa00280.html
N-Glycan biosynthesis	KEGG PATHWAY	hsa00510	1	49	0.32884	0.681403	MGAT4A	http://www.genome.jp/kegg-bin/show_pathway?hsa00510/hsa:11320%09red	img/hsa00510.html
Arginine and proline metabolism	KEGG PATHWAY	hsa00330	1	50	0.334299	0.681403	ODC1	http://www.genome.jp/kegg-bin/show_pathway?hsa00330/hsa:4953%09red	img/hsa00330.html
Adrenergic signaling in cardiomyocytes	KEGG PATHWAY	hsa04261	2	149	0.339678	0.681403	CACNG4|BCL2	http://www.genome.jp/kegg-bin/show_pathway?hsa04261/hsa:596%09red/hsa:27092%09red	img/hsa04261.html
Glutathione metabolism	KEGG PATHWAY	hsa00480	1	52	0.345086	0.681403	ODC1	http://www.genome.jp/kegg-bin/show_pathway?hsa00480/hsa:4953%09red	img/hsa00480.html
Endocytosis	KEGG PATHWAY	hsa04144	3	260	0.350931	0.681403	HSPA1B|HSPA1A|HSPA6	http://www.genome.jp/kegg-bin/show_pathway?hsa04144/hsa:3304%09red/hsa:3310%09red/hsa:3303%09red	img/hsa04144.html
Hippo signaling pathway	KEGG PATHWAY	hsa04390	2	154	0.354452	0.681403	SNAI2|AFP	http://www.genome.jp/kegg-bin/show_pathway?hsa04390/hsa:6591%09red/hsa:174%09red	img/hsa04390.html
Pathogenic Escherichia coli infection	KEGG PATHWAY	hsa05130	1	55	0.360946	0.681403	TUBB3	http://www.genome.jp/kegg-bin/show_pathway?hsa05130/hsa:10381%09red	img/hsa05130.html
Starch and sucrose metabolism	KEGG PATHWAY	hsa00500	1	57	0.371309	0.681403	MGAM	http://www.genome.jp/kegg-bin/show_pathway?hsa00500/hsa:8972%09red	img/hsa00500.html
Steroid hormone biosynthesis	KEGG PATHWAY	hsa00140	1	58	0.376428	0.681403	CYP1A1	http://www.genome.jp/kegg-bin/show_pathway?hsa00140/hsa:1543%09red	img/hsa00140.html
VEGF signaling pathway	KEGG PATHWAY	hsa04370	1	61	0.391542	0.681403	JMJD7-PLA2G4B	http://www.genome.jp/kegg-bin/show_pathway?hsa04370/hsa:8681%09red	img/hsa04370.html
cGMP-PKG signaling pathway	KEGG PATHWAY	hsa04022	2	167	0.392316	0.681403	KCNMA1|GUCY1B3	http://www.genome.jp/kegg-bin/show_pathway?hsa04022/hsa:3778%09red/hsa:2983%09red	img/hsa04022.html
Alzheimer's disease	KEGG PATHWAY	hsa05010	2	168	0.395191	0.681403	GRIN2B|CDK5R1	http://www.genome.jp/kegg-bin/show_pathway?hsa05010/hsa:8851%09red/hsa:2904%09red	img/hsa05010.html
Colorectal cancer	KEGG PATHWAY	hsa05210	1	62	0.396499	0.681403	BCL2	http://www.genome.jp/kegg-bin/show_pathway?hsa05210/hsa:596%09red	img/hsa05210.html
Arachidonic acid metabolism	KEGG PATHWAY	hsa00590	1	62	0.396499	0.681403	JMJD7-PLA2G4B	http://www.genome.jp/kegg-bin/show_pathway?hsa00590/hsa:8681%09red	img/hsa00590.html
Inflammatory bowel disease (IBD)	KEGG PATHWAY	hsa05321	1	66	0.415935	0.681403	RORA	http://www.genome.jp/kegg-bin/show_pathway?hsa05321/hsa:6095%09red	img/hsa05321.html
Aminoacyl-tRNA biosynthesis	KEGG PATHWAY	hsa00970	1	66	0.415935	0.681403	TARSL2	http://www.genome.jp/kegg-bin/show_pathway?hsa00970/hsa:123283%09red	img/hsa00970.html
Long-term potentiation	KEGG PATHWAY	hsa04720	1	66	0.415935	0.681403	GRIN2B	http://www.genome.jp/kegg-bin/show_pathway?hsa04720/hsa:2904%09red	img/hsa04720.html
Axon guidance	KEGG PATHWAY	hsa04360	2	176	0.417972	0.681403	DPYSL5|SLIT3	http://www.genome.jp/kegg-bin/show_pathway?hsa04360/hsa:6586%09red/hsa:56896%09red	img/hsa04360.html
Amphetamine addiction	KEGG PATHWAY	hsa05031	1	67	0.420697	0.681403	GRIN2B	http://www.genome.jp/kegg-bin/show_pathway?hsa05031/hsa:2904%09red	img/hsa05031.html
Central carbon metabolism in cancer	KEGG PATHWAY	hsa05230	1	67	0.420697	0.681403	GLS	http://www.genome.jp/kegg-bin/show_pathway?hsa05230/hsa:2744%09red	img/hsa05230.html
Fc epsilon RI signaling pathway	KEGG PATHWAY	hsa04664	1	68	0.425421	0.681403	JMJD7-PLA2G4B	http://www.genome.jp/kegg-bin/show_pathway?hsa04664/hsa:8681%09red	img/hsa04664.html
p53 signaling pathway	KEGG PATHWAY	hsa04115	1	69	0.430107	0.681403	GADD45G	http://www.genome.jp/kegg-bin/show_pathway?hsa04115/hsa:10912%09red	img/hsa04115.html
MicroRNAs in cancer	KEGG PATHWAY	hsa05206	3	299	0.436951	0.681403	GLS|TNC|BCL2	http://www.genome.jp/kegg-bin/show_pathway?hsa05206/hsa:3371%09red/hsa:596%09red/hsa:2744%09red	img/hsa05206.html
Melanoma	KEGG PATHWAY	hsa05218	1	71	0.439367	0.681403	FGF12	http://www.genome.jp/kegg-bin/show_pathway?hsa05218/hsa:2257%09red	img/hsa05218.html
Metabolism of xenobiotics by cytochrome P450	KEGG PATHWAY	hsa00980	1	73	0.448479	0.681403	CYP1A1	http://www.genome.jp/kegg-bin/show_pathway?hsa00980/hsa:1543%09red	img/hsa00980.html
Chemokine signaling pathway	KEGG PATHWAY	hsa04062	2	187	0.448603	0.681403	DOCK2|PREX1	http://www.genome.jp/kegg-bin/show_pathway?hsa04062/hsa:1794%09red/hsa:57580%09red	img/hsa04062.html
Adherens junction	KEGG PATHWAY	hsa04520	1	74	0.45298	0.681403	SNAI2	http://www.genome.jp/kegg-bin/show_pathway?hsa04520/hsa:6591%09red	img/hsa04520.html
Platinum drug resistance	KEGG PATHWAY	hsa01524	1	75	0.457445	0.681403	BCL2	http://www.genome.jp/kegg-bin/show_pathway?hsa01524/hsa:596%09red	img/hsa01524.html
Biosynthesis of amino acids	KEGG PATHWAY	hsa01230	1	75	0.457445	0.681403	ACO1	http://www.genome.jp/kegg-bin/show_pathway?hsa01230/hsa:48%09red	img/hsa01230.html
Cardiac muscle contraction	KEGG PATHWAY	hsa04260	1	78	0.470627	0.686731	CACNG4	http://www.genome.jp/kegg-bin/show_pathway?hsa04260/hsa:27092%09red	img/hsa04260.html
Bacterial invasion of epithelial cells	KEGG PATHWAY	hsa05100	1	78	0.470627	0.686731	SEPT1	http://www.genome.jp/kegg-bin/show_pathway?hsa05100/hsa:1731%09red	img/hsa05100.html
EGFR tyrosine kinase inhibitor resistance	KEGG PATHWAY	hsa01521	1	81	0.483494	0.690038	BCL2	http://www.genome.jp/kegg-bin/show_pathway?hsa01521/hsa:596%09red	img/hsa01521.html
Chemical carcinogenesis	KEGG PATHWAY	hsa05204	1	82	0.487714	0.690038	CYP1A1	http://www.genome.jp/kegg-bin/show_pathway?hsa05204/hsa:1543%09red	img/hsa05204.html
Insulin secretion	KEGG PATHWAY	hsa04911	1	85	0.500173	0.690038	KCNMA1	http://www.genome.jp/kegg-bin/show_pathway?hsa04911/hsa:3778%09red	img/hsa04911.html
Small cell lung cancer	KEGG PATHWAY	hsa05222	1	86	0.504259	0.690038	BCL2	http://www.genome.jp/kegg-bin/show_pathway?hsa05222/hsa:596%09red	img/hsa05222.html
Rap1 signaling pathway	KEGG PATHWAY	hsa04015	2	211	0.512255	0.690038	GRIN2B|FGF12	http://www.genome.jp/kegg-bin/show_pathway?hsa04015/hsa:2904%09red/hsa:2257%09red	img/hsa04015.html
ErbB signaling pathway	KEGG PATHWAY	hsa04012	1	88	0.512334	0.690038	NRG4	http://www.genome.jp/kegg-bin/show_pathway?hsa04012/hsa:145957%09red	img/hsa04012.html
Hematopoietic cell lineage	KEGG PATHWAY	hsa04640	1	88	0.512334	0.690038	GP1BB	http://www.genome.jp/kegg-bin/show_pathway?hsa04640/hsa:2812%09red	img/hsa04640.html
GABAergic synapse	KEGG PATHWAY	hsa04727	1	88	0.512334	0.690038	GLS	http://www.genome.jp/kegg-bin/show_pathway?hsa04727/hsa:2744%09red	img/hsa04727.html
Prostate cancer	KEGG PATHWAY	hsa05215	1	89	0.516322	0.690038	BCL2	http://www.genome.jp/kegg-bin/show_pathway?hsa05215/hsa:596%09red	img/hsa05215.html
NF-kappa B signaling pathway	KEGG PATHWAY	hsa04064	1	93	0.531959	0.697891	BCL2	http://www.genome.jp/kegg-bin/show_pathway?hsa04064/hsa:596%09red	img/hsa04064.html
Fc gamma R-mediated phagocytosis	KEGG PATHWAY	hsa04666	1	93	0.531959	0.697891	DOCK2	http://www.genome.jp/kegg-bin/show_pathway?hsa04666/hsa:1794%09red	img/hsa04666.html
Pancreatic secretion	KEGG PATHWAY	hsa04972	1	96	0.543359	0.706367	KCNMA1	http://www.genome.jp/kegg-bin/show_pathway?hsa04972/hsa:3778%09red	img/hsa04972.html
Inflammatory mediator regulation of TRP channels	KEGG PATHWAY	hsa04750	1	98	0.550808	0.709599	JMJD7-PLA2G4B	http://www.genome.jp/kegg-bin/show_pathway?hsa04750/hsa:8681%09red	img/hsa04750.html
Metabolic pathways	KEGG PATHWAY	hsa01100	10	1241	0.558036	0.710896	PGAP1|CYP1A1|JMJD7-PLA2G4B|MGAM|MGAT4A|CYP26A1|ACO1|GLS|ODC1|B4GALT6	http://www.genome.jp/kegg-bin/show_pathway?hsa01100/hsa:2744%09red/hsa:8972%09red/hsa:80055%09red/hsa:9331%09red/hsa:4953%09red/hsa:48%09red/hsa:8681%09red/hsa:1592%09red/hsa:11320%09red/hsa:1543%09red	img/hsa01100.html
Choline metabolism in cancer	KEGG PATHWAY	hsa05231	1	101	0.561757	0.710896	JMJD7-PLA2G4B	http://www.genome.jp/kegg-bin/show_pathway?hsa05231/hsa:8681%09red	img/hsa05231.html
HIF-1 signaling pathway	KEGG PATHWAY	hsa04066	1	103	0.56891	0.713633	BCL2	http://www.genome.jp/kegg-bin/show_pathway?hsa04066/hsa:596%09red	img/hsa04066.html
Serotonergic synapse	KEGG PATHWAY	hsa04726	1	112	0.599706	0.741074	JMJD7-PLA2G4B	http://www.genome.jp/kegg-bin/show_pathway?hsa04726/hsa:8681%09red	img/hsa04726.html
Carbon metabolism	KEGG PATHWAY	hsa01200	1	113	0.602991	0.741074	ACO1	http://www.genome.jp/kegg-bin/show_pathway?hsa01200/hsa:48%09red	img/hsa01200.html
Leukocyte transendothelial migration	KEGG PATHWAY	hsa04670	1	118	0.619025	0.741074	MMP2	http://www.genome.jp/kegg-bin/show_pathway?hsa04670/hsa:4313%09red	img/hsa04670.html
Neurotrophin signaling pathway	KEGG PATHWAY	hsa04722	1	120	0.625259	0.741074	BCL2	http://www.genome.jp/kegg-bin/show_pathway?hsa04722/hsa:596%09red	img/hsa04722.html
Sphingolipid signaling pathway	KEGG PATHWAY	hsa04071	1	121	0.628338	0.741074	BCL2	http://www.genome.jp/kegg-bin/show_pathway?hsa04071/hsa:596%09red	img/hsa04071.html
Pathways in cancer	KEGG PATHWAY	hsa05200	3	397	0.62975	0.741074	FGF12|MMP2|BCL2	http://www.genome.jp/kegg-bin/show_pathway?hsa05200/hsa:4313%09red/hsa:2257%09red/hsa:596%09red	img/hsa05200.html
Oocyte meiosis	KEGG PATHWAY	hsa04114	1	123	0.634422	0.741074	FBXO43	http://www.genome.jp/kegg-bin/show_pathway?hsa04114/hsa:286151%09red	img/hsa04114.html
Lysosome	KEGG PATHWAY	hsa04142	1	123	0.634422	0.741074	AP1S2	http://www.genome.jp/kegg-bin/show_pathway?hsa04142/hsa:8905%09red	img/hsa04142.html
Cell cycle	KEGG PATHWAY	hsa04110	1	124	0.637427	0.741074	GADD45G	http://www.genome.jp/kegg-bin/show_pathway?hsa04110/hsa:10912%09red	img/hsa04110.html
Dopaminergic synapse	KEGG PATHWAY	hsa04728	1	130	0.654955	0.755311	GRIN2B	http://www.genome.jp/kegg-bin/show_pathway?hsa04728/hsa:2904%09red	img/hsa04728.html
FoxO signaling pathway	KEGG PATHWAY	hsa04068	1	134	0.666175	0.762104	GADD45G	http://www.genome.jp/kegg-bin/show_pathway?hsa04068/hsa:10912%09red	img/hsa04068.html
Tight junction	KEGG PATHWAY	hsa04530	1	139	0.679697	0.771402	RAB3B	http://www.genome.jp/kegg-bin/show_pathway?hsa04530/hsa:5865%09red	img/hsa04530.html
Phospholipase D signaling pathway	KEGG PATHWAY	hsa04072	1	144	0.692681	0.77345	JMJD7-PLA2G4B	http://www.genome.jp/kegg-bin/show_pathway?hsa04072/hsa:8681%09red	img/hsa04072.html
Cell adhesion molecules (CAMs)	KEGG PATHWAY	hsa04514	1	145	0.695215	0.77345	ITGA9	http://www.genome.jp/kegg-bin/show_pathway?hsa04514/hsa:3680%09red	img/hsa04514.html
Hepatitis B	KEGG PATHWAY	hsa05161	1	146	0.697728	0.77345	BCL2	http://www.genome.jp/kegg-bin/show_pathway?hsa05161/hsa:596%09red	img/hsa05161.html
Phagosome	KEGG PATHWAY	hsa04145	1	155	0.719451	0.791397	TUBB3	http://www.genome.jp/kegg-bin/show_pathway?hsa04145/hsa:10381%09red	img/hsa04145.html
Jak-STAT signaling pathway	KEGG PATHWAY	hsa04630	1	158	0.726346	0.792881	BCL2	http://www.genome.jp/kegg-bin/show_pathway?hsa04630/hsa:596%09red	img/hsa04630.html
RNA transport	KEGG PATHWAY	hsa03013	1	172	0.756381	0.817816	EIF3CL	http://www.genome.jp/kegg-bin/show_pathway?hsa03013/hsa:728689%09red	img/hsa03013.html
Purine metabolism	KEGG PATHWAY	hsa00230	1	175	0.762383	0.817816	GUCY1B3	http://www.genome.jp/kegg-bin/show_pathway?hsa00230/hsa:2983%09red	img/hsa00230.html
Tuberculosis	KEGG PATHWAY	hsa05152	1	179	0.770159	0.817816	BCL2	http://www.genome.jp/kegg-bin/show_pathway?hsa05152/hsa:596%09red	img/hsa05152.html
Transcriptional misregulation in cancer	KEGG PATHWAY	hsa05202	1	180	0.772064	0.817816	HIST1H3C	http://www.genome.jp/kegg-bin/show_pathway?hsa05202/hsa:8352%09red	img/hsa05202.html
Herpes simplex infection	KEGG PATHWAY	hsa05168	1	186	0.783171	0.823481	TAF9B	http://www.genome.jp/kegg-bin/show_pathway?hsa05168/hsa:51616%09red	img/hsa05168.html
Huntington's disease	KEGG PATHWAY	hsa05016	1	193	0.795459	0.830296	GRIN2B	http://www.genome.jp/kegg-bin/show_pathway?hsa05016/hsa:2904%09red	img/hsa05016.html
cAMP signaling pathway	KEGG PATHWAY	hsa04024	1	199	0.805444	0.832414	GRIN2B	http://www.genome.jp/kegg-bin/show_pathway?hsa04024/hsa:2904%09red	img/hsa04024.html
Viral carcinogenesis	KEGG PATHWAY	hsa05203	1	205	0.81495	0.832414	HIST1H4C	http://www.genome.jp/kegg-bin/show_pathway?hsa05203/hsa:8364%09red	img/hsa05203.html
Proteoglycans in cancer	KEGG PATHWAY	hsa05205	1	205	0.81495	0.832414	MMP2	http://www.genome.jp/kegg-bin/show_pathway?hsa05205/hsa:4313%09red	img/hsa05205.html
HTLV-I infection	KEGG PATHWAY	hsa05166	1	259	0.882343	0.894396	MYBL1	http://www.genome.jp/kegg-bin/show_pathway?hsa05166/hsa:4603%09red	img/hsa05166.html
Cytokine-cytokine receptor interaction	KEGG PATHWAY	hsa04060	1	265	0.888142	0.894396	AMHR2	http://www.genome.jp/kegg-bin/show_pathway?hsa04060/hsa:269%09red	img/hsa04060.html
Neuroactive ligand-receptor interaction	KEGG PATHWAY	hsa04080	1	278	0.899759	0.899759	GRIN2B	http://www.genome.jp/kegg-bin/show_pathway?hsa04080/hsa:2904%09red	img/hsa04080.html
