# Supplementary material for: RNA-binding protein CELF6 modulates transcription and splicing levels of genes associated with tumorigenesis in lung cancer A549 cells
Source: PeerJ. 2022 Jul 26;10:e13800. doi: 10.7717/peerj.13800 (PMC9336609; doi:10.7717/peerj.13800)
Supplement: Supplemental Information 9 [file peerj-10-13800-s009.xls]

## Sheet: Down_GO_enrichment_P
#fg	828
#bg	14960
##Statistical test method: hypergeometric test
##FDR correction method: Benjamini and Hochberg
#Term	Database	ID	Input number	Background number	P-Value	Corrected P-Value	Input	Hyperlink
--------------------
#Term	Database	ID	Input number	Background number	P-Value	Corrected P-Value	Input	Hyperlink
--------------------
#Term	Database	ID	Input number	Background number	P-Value	Corrected P-Value	Input	Hyperlink
type I interferon-mediated signaling pathway	Gene Ontology	GO:0060337	34	65	0	0	HLA-C|HLA-B|HLA-A|MX2|HLA-F|HLA-E|MX1|HLA-G|IFIT3|IFIT2|IFIT1|IRF1|STAT2|STAT1|IFNB1|OAS1|OAS3|OAS2|ISG15|IFI27|IFITM3|IFITM2|IFITM1|GBP2|IFI35|OASL|IRF7|USP18|XAF1|SOCS1|IRF6|IFI6|PSMB8|ISG20	http://amigo.geneontology.org/amigo/term/GO:0060337
cytokine-mediated signaling pathway	Gene Ontology	GO:0019221	57	229	0	0	IL20RA|CX3CL1|MT2A|HLA-C|HLA-B|IFI27|MX2|HLA-F|HLA-E|MX1|UBE2L6|CCR1|B2M|PTAFR|IFNGR1|HLA-G|IFIT3|IFIT2|IFIT1|STAT2|STAT1|IL12RB1|IFNB1|OAS1|OAS3|OAS2|ISG15|ICAM1|PML|IL22RA1|EDN2|HLA-A|IFITM3|IFITM2|IFITM1|GBP2|GBP1|IFI35|XAF1|OASL|UBA7|HERC5|VCAM1|IRF7|USP18|IRF1|MYD88|SOCS1|IRF6|IFI6|CSF3|IL6|STAT5A|PSMB8|ISG20|IL15RA|EBI3	http://amigo.geneontology.org/amigo/term/GO:0019221
defense response to virus	Gene Ontology	GO:0051607	47	145	0	0	MX2|MX1|NLRC5|IFNB1|IFIT3|IFIT2|IFIT1|OAS1|IFNL2|DHX58|IFNL4|STAT2|STAT1|IFI16|RSAD2|IFI44L|OAS3|OAS2|ISG15|PML|PYCARD|TMEM173|IFITM3|IFITM2|IFITM1|IFNL1|GBP3|GBP1|CD40|TRIM22|OASL|IFNL3|HERC5|CXCL10|ITGAX|IRF1|SAMHD1|APOBEC3H|APOBEC3G|APOBEC3F|APOBEC3A|APOBEC3B|IL6|TLR3|BST2|ISG20|TRIM5	http://amigo.geneontology.org/amigo/term/GO:0051607
negative regulation of viral genome replication	Gene Ontology	GO:0045071	20	34	0	0	SLPI|IFITM2|IFITM1|CCL5|APOBEC3G|APOBEC3F|APOBEC3A|IFI16|PARP10|OASL|OAS1|IFNB1|OAS3|ISG15|BST2|ISG20|MX1|IFITM3|RSAD2|IFIT1	http://amigo.geneontology.org/amigo/term/GO:0045071
response to virus	Gene Ontology	GO:0009615	34	114	2.22045e-16	1.64313e-14	ACTA2|IFIH1|CCL4|CCL5|MX2|MX1|IFNGR1|IFIT3|RSAD2|IFIT1|DDX58|DHX58|IFNB1|OAS1|OAS3|OAS2|CCL22|IFITM3|IFITM2|IFITM1|OASL|TRIM22|IFIT2|SERPINB3|GATA3|MYD88|IRF7|CCL19|HYAL1|MST1R|BST2|ISG20|ACE2|IFI44	http://amigo.geneontology.org/amigo/term/GO:0009615
immune response	Gene Ontology	GO:0006955	71	476	1.35447e-14	8.35258e-13	CD74|TNFSF13|C5AR1|TNFSF10|CCL4|TNFSF14|HLA-C|HLA-B|HLA-A|TINAGL1|HLA-G|HLA-F|HLA-E|IL6|TNFRSF14|HLA-H|PTAFR|TLR1|CCR7|CD79B|TNFSF13B|TAPBP|CTSS|XBP1|TNFRSF1B|SLC11A1|FAS|CCL5|MR1|S1PR4|IFI44L|CCL28|OAS3|OAS2|C1R|CXCL10|NFIL3|CX3CL1|CCL20|CCL22|CCL26|IFITM3|IFITM2|IL1RN|GBP2|TRIM22|VTN|SERPINB9|C3|GTPBP1|OAS1|CXCL11|PDCD1LG2|ENPP1|BMP6|FCGRT|SAMHD1|IL2RG|ACKR4|CD274|CCL17|CCR1|SECTM1|CSF3|TLR2|IF…	http://amigo.geneontology.org/amigo/term/GO:0006955
interferon-gamma-mediated signaling pathway	Gene Ontology	GO:0060333	24	65	2.24265e-14	1.1854e-12	MT2A|HLA-C|HLA-B|HLA-A|HLA-G|HLA-F|HLA-E|B2M|PTAFR|IFNGR1|STAT1|OAS1|OAS3|OAS2|ICAM1|PML|GBP2|GBP1|OASL|VCAM1|SOCS1|IRF1|IRF7|IRF6	http://amigo.geneontology.org/amigo/term/GO:0060333
inflammatory response	Gene Ontology	GO:0006954	53	307	9.81437e-14	4.53915e-12	BMP6|CCL3|CCL4|CCL5|GPER1|CCR1|C5AR1|PTAFR|TP73|IL27|CCR7|TLR2|SERPINA1|SERPINA3|PLA2G4C|SLC11A1|MECOM|PYCARD|IFI16|THEMIS2|S100A9|C4A|C4B|C3|CCL20|MYD88|APOL3|C5|CCL26|NOS2|ITGB2|FOS|CD40|IL34|GGT5|CXCL11|CXCL10|NOX1|CCL22|TNFRSF1B|OLR1|CCL17|CCL19|HYAL1|CSF1|TNFAIP3|IL6|TLR3|TLR1|LXN|IL17RE|BLNK|NMI	http://amigo.geneontology.org/amigo/term/GO:0006954
innate immune response	Gene Ontology	GO:0045087	93	754	1.48659e-13	6.11153e-12	C4A|MOV10|NCF2|CASP10|B2M|IL27|TRIM15|TMEM173|LBP|C1RL|MR1|PIK3R2|ERBB3|CTSL|TRIM21|CTSS|GATA3|GPER1|MST1R|CSF1|TLR2|TLR3|TLR1|BST2|APOBEC3F|HLA-C|HLA-B|TRIM31|SAA1|MX1|UBE2L6|ITGB2|RSAD2|DDX58|MASP1|C4BPA|C4BPB|TREX1|EGF|ISG15|JAK3|C4B|MYD88|FOS|UBA7|HERC5|SARM1|IRF7|LGMN|TNFAIP3|ITGAM|BTC|TRIM5|PDGFRB|SERPING1|TXNIP|DHX58|IFNB1|IFI16|S100A9|PML|C2|CDKN1A|C5|VTN|C3|HLA-E|APOBEC3H|APOBEC3G|CASP1|…	http://amigo.geneontology.org/amigo/term/GO:0045087
positive regulation of T cell mediated cytotoxicity	Gene Ontology	GO:0001916	12	22	2.95604e-10	1.09374e-08	TAP1|TAP2|HLA-C|HLA-B|HLA-A|HLA-G|HLA-F|HLA-E|MR1|IL12RB1|B2M|HLA-H	http://amigo.geneontology.org/amigo/term/GO:0001916
negative regulation of endopeptidase activity	Gene Ontology	GO:0010951	23	90	4.18096e-10	1.40632e-08	TIMP3|BIRC7|SERPING1|ITIH2|SERPINE1|SERPINA1|SERPINA3|AMBP|AGT|CST2|CST3|CST1|VTN|SERPINB9|SPINT1|SERPINF1|SERPINI1|SERPINB1|SERPINB3|PI3|SERPINB4|SLPI|BST2	http://amigo.geneontology.org/amigo/term/GO:0010951
signal transduction	Gene Ontology	GO:0007165	106	1045	5.29455e-10	1.63249e-08	CD38|CD34|CHN2|C5AR1|RASAL1|EGF|PECAM1|IL12RB1|MR1|EDN3|FGG|FGA|FGB|ERBB3|EXT1|CXCL11|CXCL10|GATA3|MYD88|INPP5D|SFRP5|MST1R|SECTM1|RHBDL1|TLR2|TLR3|TLR1|BST2|CD300C|RASSF9|TNFSF10|CCL4|TNFSF14|RASSF4|MX1|NOX1|ACVRL1|IFNGR1|EDNRA|WISP2|INSL4|PVRL2|TNFRSF8|PIK3R2|NEDD9|NR1H4|CCL20|CCL22|CLDN4|CCL26|PLCB1|CHRM4|CACNA1I|TNFSF13|IGFBP5|GRN|SARM1|PLXNC1|CD274|KRT17|IL15RA|CD74|PDGFRB|CHRNB2|RET|TRIM38|…	http://amigo.geneontology.org/amigo/term/GO:0007165
antigen processing and presentation of exogenous peptide antigen via MHC class I, TAP-independent	Gene Ontology	GO:0002480	8	9	7.30146e-10	2.07811e-08	HLA-C|HLA-B|HLA-A|HLA-G|HLA-F|HLA-E|B2M|CTSS	http://amigo.geneontology.org/amigo/term/GO:0002480
regulation of complement activation	Gene Ontology	GO:0030449	12	24	1.11505e-09	2.94692e-08	CFH|CFI|C4BPA|C4BPB|CFB|VTN|C4A|C4B|C8G|C3|C2|C5	http://amigo.geneontology.org/amigo/term/GO:0030449
acute-phase response	Gene Ontology	GO:0006953	13	37	4.29591e-08	1.05966e-06	SERPINA1|F2|SERPINA3|FN1|IL1RN|SAA4|SAA2|SAA1|UGT1A1|IL6|AHSG|LBP|APOL2	http://amigo.geneontology.org/amigo/term/GO:0006953
response to lipopolysaccharide	Gene Ontology	GO:0032496	24	124	6.47664e-08	1.49772e-06	NCF2|IDO1|C5AR1|CCR7|EDNRA|IL18BP|UGT1A1|SERPINA1|SLC11A1|PTGER2|S100A14|S100A9|LBP|NR1H4|CNP|FOS|PTGIR|SRR|VCAM1|DUSP10|IL1RN|CASP1|CASP9|IL6	http://amigo.geneontology.org/amigo/term/GO:0032496
antigen processing and presentation of peptide antigen via MHC class I	Gene Ontology	GO:0002474	21	98	6.88966e-08	1.49951e-06	TAP1|NCF2|ERAP1|HLA-H|PSME1|PSMB10|HLA-C|HLA-B|HLA-A|PSME2|HLA-G|HLA-F|HLA-E|MR1|TAPBP|B2M|TAP2|PSMB9|PSMB8|ERAP2|CTSS	http://amigo.geneontology.org/amigo/term/GO:0002474
negative regulation of endothelial cell apoptotic process	Gene Ontology	GO:2000352	9	19	2.60895e-07	5.36285e-06	ANGPT1|TNFAIP3|FGA|SERPINE1|ANGPTL4|ICAM1|FGG|GATA3|FGB	http://amigo.geneontology.org/amigo/term/GO:2000352
defense response to Gram-negative bacterium	Gene Ontology	GO:0050829	10	25	3.90427e-07	7.60305e-06	LBP|NOS2|SLC11A1|MR1|IL6|TNFRSF14|PYCARD|MMP7|IL22RA1|SERPINE1	http://amigo.geneontology.org/amigo/term/GO:0050829
antigen processing and presentation of endogenous peptide antigen via MHC class I	Gene Ontology	GO:0019885	5	5	5.13487e-07	9.49951e-06	TAP1|ERAP2|ERAP1|TAP2|TAPBP	http://amigo.geneontology.org/amigo/term/GO:0019885
proteolysis	Gene Ontology	GO:0006508	31	211	6.06669e-07	1.06889e-05	ERAP2|ERAP1|PCSK9|TMPRSS7|MMP13|LAP3|MMP19|ST14|FBXO6|CPQ|HTRA3|NAPSA|ADAMTS9|DPP4|CTSL|CTSO|TMPRSS3|F2|PLAT|F10|CTSS|CASP4|LGMN|OLR1|F7|CFD|CASP1|FBXO2|UBD|MMP9|MMP7	http://amigo.geneontology.org/amigo/term/GO:0006508
response to drug	Gene Ontology	GO:0042493	39	305	8.93631e-07	1.50292e-05	CD38|NCF2|CSAG2|CDKN1A|JUNB|RET|B2M|MAP2K6|ABAT|TXNIP|PLIN2|UGT1A1|XBP1|MDK|APOD|STAT1|NTRK1|KCNK3|INHBA|ICAM1|CDH1|CDH3|ITGA2|IGF2|AQP7|NAT8|FOS|SRR|GATA6|GATA3|IL1RN|CA9|ATP4A|IL6|SNCG|NNMT|MMP7|ABCC6|SLC1A2	http://amigo.geneontology.org/amigo/term/GO:0042493
antigen processing and presentation of exogenous peptide antigen via MHC class I	Gene Ontology	GO:0042590	17	79	1.13812e-06	1.83089e-05	TAP1|NCF2|TAP2|PSMB10|HLA-C|HLA-B|HLA-A|PSME2|HLA-G|HLA-F|HLA-E|PSME1|TAPBP|B2M|PSMB9|PSMB8|CTSS	http://amigo.geneontology.org/amigo/term/GO:0042590
extracellular matrix organization	Gene Ontology	GO:0030198	39	312	1.58438e-06	2.44259e-05	COLGALT2|MMP13|ITGA1|ITGA2|MMP19|NOX1|APLP1|SMOC1|AGT|SERPINE1|FBLN5|PECAM1|SPINT1|ADAMTSL4|ADAMTS2|NID1|ICAM2|ICAM1|CDH1|FGG|FGA|FGB|LAMA2|ITGB2|CTSL|CD47|VTN|COL5A3|VCAM1|COL16A1|CTSS|ITGAX|KAZALD1|FN1|COL22A1|NPNT|ITGAM|MMP9|MMP7	http://amigo.geneontology.org/amigo/term/GO:0030198
positive regulation of inflammatory response	Gene Ontology	GO:0050729	13	49	1.70518e-06	2.52367e-05	CCL3|TGM2|CD47|SERPINE1|TLR2|TLR3|STAT5A|S100A9|CX3CL1|EDNRA|AGTR1|AGT|ITGA2	http://amigo.geneontology.org/amigo/term/GO:0050729
antigen processing and presentation of exogenous peptide antigen via MHC class I, TAP-dependent	Gene Ontology	GO:0002479	16	75	2.64536e-06	3.62731e-05	TAP1|NCF2|TAP2|PSMB10|HLA-C|HLA-B|HLA-A|PSME2|HLA-G|HLA-F|HLA-E|PSME1|TAPBP|B2M|PSMB9|PSMB8	http://amigo.geneontology.org/amigo/term/GO:0002479
cell-cell signaling	Gene Ontology	GO:0007267	32	237	2.64696e-06	3.62731e-05	CCL3|EFNB1|CCL4|CCL5|CCR1|TNFSF10|AGT|INHBA|GJB1|INSL4|GJB2|INSL3|DLGAP3|S100A9|NFE2|CCL20|FGF11|CCL22|CCL26|ITGB2|PTGIR|DLL1|CXCL11|CXCL10|EDN3|SEMA3B|CCL17|PCDH1|WISP2|SSTR2|BST2|STC1	http://amigo.geneontology.org/amigo/term/GO:0007267
response to interferon-beta	Gene Ontology	GO:0035456	5	6	2.93963e-06	3.88451e-05	IFITM3|IFITM2|IFITM1|XAF1|BST2	http://amigo.geneontology.org/amigo/term/GO:0035456
response to toxin	Gene Ontology	GO:0009636	15	68	3.48171e-06	4.44219e-05	PDGFRB|CCL3|CCL4|CNP|CCL5|PON1|CDKN1A|NUPR1|DHRS2|SLC23A1|PDZD3|FAS|CDH1|TLR2|FOS	http://amigo.geneontology.org/amigo/term/GO:0009636
positive regulation of ERK1 and ERK2 cascade	Gene Ontology	GO:0070374	19	107	5.74171e-06	7.08145e-05	CD74|NPNT|FGG|CCL3|CCR7|CCL19|IL6|NTRK1|GPER1|CCR1|C5AR1|PRKD2|ICAM1|PYCARD|EDNRA|ANGPT1|PDGFRB|FGA|FGB	http://amigo.geneontology.org/amigo/term/GO:0070374
defense response to Gram-positive bacterium	Gene Ontology	GO:0050830	12	48	8.37632e-06	9.99754e-05	H2BFS|LBP|MYO1F|TLR2|IL6|TNFRSF14|C5AR1|HIST2H2BE|MMP7|MYD88|HIST1H2BJ|HIST1H2BK	http://amigo.geneontology.org/amigo/term/GO:0050830
negative regulation of transposition	Gene Ontology	GO:0010529	5	7	9.81749e-06	0.000110075	APOBEC3G|APOBEC3F|APOBEC3A|APOBEC3H|APOBEC3B	http://amigo.geneontology.org/amigo/term/GO:0010529
peptide transport	Gene Ontology	GO:0015833	5	7	9.81749e-06	0.000110075	DISP1|TAP1|TAP2|SLC15A3|TAPBP	http://amigo.geneontology.org/amigo/term/GO:0015833
positive regulation of defense response to virus by host	Gene Ontology	GO:0002230	7	16	1.14246e-05	0.000124327	DDX58|IL12RB1|APOBEC3G|APOBEC3F|PML|PYCARD|TMEM173	http://amigo.geneontology.org/amigo/term/GO:0002230
cellular response to mechanical stimulus	Gene Ontology	GO:0071260	14	66	1.18843e-05	0.000125634	IGF2|KCNJ2|IRF1|MYD88|CASP1|FAS|TNFSF14|CD40|TLR3|TNFRSF8|BMP6|GADD45A|EDNRA|AGT	http://amigo.geneontology.org/amigo/term/GO:0071260
response to interferon-gamma	Gene Ontology	GO:0034341	8	22	1.35852e-05	0.000139625	IFITM3|IFITM2|IFITM1|SLC11A1|NUB1|UBD|BST2|CXCL16	http://amigo.geneontology.org/amigo/term/GO:0034341
positive regulation of NF-kappaB transcription factor activity	Gene Ontology	GO:0051092	20	127	2.11398e-05	0.000211398	TRAF1|MYD88|RHEBL1|TLR3|CARD11|NTRK1|TRADD|CARD14|TLR2|IL6|TRIM38|S100A9|TRIM22|ICAM1|PYCARD|TRIM15|CD40|AGT|TRIM5|PRKD2	http://amigo.geneontology.org/amigo/term/GO:0051092
chemotaxis	Gene Ontology	GO:0006935	19	118	2.45313e-05	0.000238858	CX3CL1|CCL3|CCL17|ACKR4|PLAUR|CCL5|CCR1|CCL26|CCL28|TYMP|C5AR1|PTAFR|CXCL10|CCR7|CXCL11|CCL20|CCL22|C5|CXCL16	http://amigo.geneontology.org/amigo/term/GO:0006935
complement activation, alternative pathway	Gene Ontology	GO:0006957	6	13	3.46247e-05	0.000320279	CFH|CFD|CFB|C8G|C3|C5	http://amigo.geneontology.org/amigo/term/GO:0006957
regulation of innate immune response	Gene Ontology	GO:0045088	6	13	3.46247e-05	0.000320279	IRF1|SAMHD1|DHX58|MYO1F|BIRC3|ERAP1	http://amigo.geneontology.org/amigo/term/GO:0045088
neutrophil chemotaxis	Gene Ontology	GO:0030593	10	39	3.7415e-05	0.000337647	CCL3|ITGB2|ITGA1|SAA1|C5AR1|S100A9|ITGAM|CX3CL1|EDN3|EDN2	http://amigo.geneontology.org/amigo/term/GO:0030593
positive regulation of interleukin-12 production	Gene Ontology	GO:0032735	8	25	3.96087e-05	0.000348934	PLCB1|IDO1|CCL19|HLA-G|CD40|TLR2|TLR3|CCR7	http://amigo.geneontology.org/amigo/term/GO:0032735
negative regulation of type I interferon production	Gene Ontology	GO:0032480	9	32	4.12766e-05	0.000355171	DDX58|HERC5|DHX58|IFIH1|TNFAIP3|UBE2L6|UBA7|ISG15|NLRC5	http://amigo.geneontology.org/amigo/term/GO:0032480
regulation of apoptotic process	Gene Ontology	GO:0042981	23	166	4.36955e-05	0.000367439	IFIH1|PSMB10|BIRC3|CASP10|SEPT4|BCL2L14|STAT1|FAS|PAX8|CARD11|PSME2|CARD16|CARD14|PSME1|CIDEB|CIDEC|ACTN2|CASP4|BCL2L13|CASP1|CASP9|PSMB9|PSMB8	http://amigo.geneontology.org/amigo/term/GO:0042981
leukocyte migration	Gene Ontology	GO:0050900	18	113	4.61747e-05	0.000379659	ITGAX|SELL|F2|ITGB2|INPP5D|FN1|OLR1|PECAM1|SLC7A7|SLC16A3|CD34|ATP1B1|PIK3R2|ICAM1|MMP9|ANGPT1|CD47|ITGAM	http://amigo.geneontology.org/amigo/term/GO:0050900
regulation of proteolysis	Gene Ontology	GO:0030162	10	40	4.74358e-05	0.000381549	SERPINA1|SERPINA3|PLAUR|SERPINB9|SERPINF1|SERPINB1|SERPINI1|SERPINB3|AGT|SERPINB4	http://amigo.geneontology.org/amigo/term/GO:0030162
cellular response to interferon-beta	Gene Ontology	GO:0035458	5	9	5.36432e-05	0.000405061	TLR3|IRF1|TREX1|TMEM173|STAT1	http://amigo.geneontology.org/amigo/term/GO:0035458
negative regulation of viral entry into host cell	Gene Ontology	GO:0046597	5	9	5.36432e-05	0.000405061	IFITM3|IFITM2|TRIM31|TRIM5|IFITM1	http://amigo.geneontology.org/amigo/term/GO:0046597
response to interferon-alpha	Gene Ontology	GO:0035455	5	9	5.36432e-05	0.000405061	IFITM3|IFITM2|IFITM1|MX2|BST2	http://amigo.geneontology.org/amigo/term/GO:0035455
response to hypoxia	Gene Ontology	GO:0001666	22	159	6.49501e-05	0.000470526	CD38|ITGA2|ABAT|EDNRA|SERPINA1|RYR1|CHRNB2|PML|CITED2|DPP4|NOS1|NOS2|NR4A2|MUC1|PLAT|VCAM1|ALDOC|ATP1B1|ANG|CASP1|TLR2|ANGPTL4	http://amigo.geneontology.org/amigo/term/GO:0001666
regulation of cell proliferation	Gene Ontology	GO:0042127	18	116	6.58276e-05	0.000470526	ERBB3|NOS2|CXCL11|BIRC7|MZB1|MMP7|FA2H|PTGER2|MECOM|PTGS1|PRG4|CXCL10|PLCD1|TXNIP|ACE2|AGTR1|AGT|SERPINE1	http://amigo.geneontology.org/amigo/term/GO:0042127
cell adhesion	Gene Ontology	GO:0007155	45	445	6.71116e-05	0.000470526	EFNB1|CCL4|CDH16|GP1BA|ITGA2|CD34|CCR1|PRKD2|HABP2|APLP1|NEDD9|WISP2|AMBP|THEMIS2|ICAM1|ITGA1|CX3CL1|CDH3|DPP4|ITGAM|ITGAX|LAMA2|ITGB2|SELL|PECAM1|CD47|VTN|LGALS3BP|FLRT3|TINAG|VCAM1|NPHS1|KIRREL2|MUC16|COL16A1|ATP1B1|PLXNC1|ACTN2|PTPRU|APBA1|FN1|SCARB2|CDHR5|PDZD2|HAPLN3	http://amigo.geneontology.org/amigo/term/GO:0007155
female pregnancy	Gene Ontology	GO:0007565	15	86	6.73997e-05	0.000470526	CD38|IL1RN|IGF2|IDO1|FOS|INSL4|MUC1|TAC3|AMBP|PAPPA|STAT5A|STS|PSG4|CLDN4|COL16A1	http://amigo.geneontology.org/amigo/term/GO:0007565
positive regulation of reactive oxygen species metabolic process	Gene Ontology	GO:2000379	8	27	7.36514e-05	0.000504649	PDGFRB|F2|GADD45A|CDKN1A|XDH|ACE2|AGTR1|AGT	http://amigo.geneontology.org/amigo/term/GO:2000379
regulation of blood pressure	Gene Ontology	GO:0008217	12	59	7.67669e-05	0.000516432	ACTA2|ERAP2|PTGS1|ACVRL1|NPR1|CACNA1B|CD34|ERAP1|NOX1|EDNRA|CYP4F2|P2RX4	http://amigo.geneontology.org/amigo/term/GO:0008217
cellular response to extracellular stimulus	Gene Ontology	GO:0031668	6	15	9.17649e-05	0.000606304	FOS|NR4A2|CDKN1A|GSDMD|ASGR1|SLC1A2	http://amigo.geneontology.org/amigo/term/GO:0031668
negative regulation of smooth muscle cell proliferation	Gene Ontology	GO:0048662	8	28	9.81458e-05	0.000631421	NPR1|APOD|ANG|TNFAIP3|PTGIR|IGFBP3|KLF4|IGFBP5	http://amigo.geneontology.org/amigo/term/GO:0048662
immunoglobulin mediated immune response	Gene Ontology	GO:0016064	5	10	0.000102393	0.000631421	CD74|INPP5D|MYD88|IRF7|HLA-DMA	http://amigo.geneontology.org/amigo/term/GO:0016064
positive regulation of T cell migration	Gene Ontology	GO:2000406	5	10	0.000102393	0.000631421	CCL20|TNFRSF14|PYCARD|CXCL10|CCL5	http://amigo.geneontology.org/amigo/term/GO:2000406
positive regulation of leukocyte chemotaxis	Gene Ontology	GO:0002690	5	10	0.000102393	0.000631421	IL6|CXCL10|EDN3|EDN2|F7	http://amigo.geneontology.org/amigo/term/GO:0002690
apoptotic process	Gene Ontology	GO:0006915	56	605	0.000105496	0.000634052	PCSK9|PSMB10|BIRC7|BIRC3|MX1|CASP10|KLLN|MAP2K6|SEPT4|APLP1|BBC3|PML|TMEM173|BCL2L15|BCL2L14|TNFSF10|STAT1|MECOM|FAS|MZB1|TNFSF14|CSRNP1|TRADD|S100A14|BCL2L13|CDH1|PYCARD|C8orf4|TRAF1|H1F0|PSMB9|TP63|PSMB8|PSME2|CASP4|PSME1|IGFBP3|IRF1|ALDOC|CARD14|CIDEB|CIDEC|XAF1|INPP5D|ADAMTSL4|SFRP5|CASP1|TNFAIP3|CASP9|TLR2|ARHGEF6|C5AR1|ITGB2|EDAR|GADD45A|PTPRH	http://amigo.geneontology.org/amigo/term/GO:0006915
positive regulation of I-kappaB kinase/NF-kappaB cascade	Gene Ontology	GO:0043123	21	153	0.000106247	0.000634052	TRAF1|TGM2|TNFSF10|CASP1|APOL3|CARD11|CCR7|BIRC3|SECTM1|TRIM22|CD40|UBD|TLR3|LGALS9|TRIM38|TRADD|CASP10|BST2|MYD88|TRIM5|CCL19	http://amigo.geneontology.org/amigo/term/GO:0043123
blood coagulation	Gene Ontology	GO:0007596	46	469	0.000115747	0.000679782	IGF2|NOS1|SLC7A7|ITGA2|SERPING1|SERPINE1|FBLN5|PECAM1|C4BPB|ATP2A3|GP1BA|IFNB1|PIK3R2|ITGA1|TF|SLC8A2|EGF|FGA|FGB|NFE2|PLAUR|ITGAX|NOS2|ITGB2|ANGPT1|PLAT|SERPINA1|CD47|IRF1|ATP1B1|GATA6|F10|PTGIR|GATA3|SELL|ACTN2|F2|FGG|INPP5D|OLR1|FN1|F7|CFD|HNF4A|ITGAM|SLC16A3	http://amigo.geneontology.org/amigo/term/GO:0007596
cell chemotaxis	Gene Ontology	GO:0060326	10	45	0.000138828	0.000802598	PDGFRB|CCL4|CCL17|CCL28|VCAM1|CCL20|AGTR1|CCL22|C5|CCL26	http://amigo.geneontology.org/amigo/term/GO:0060326
positive regulation of protein kinase B signaling cascade	Gene Ontology	GO:0051897	13	74	0.000188512	0.00107307	IGF2|CCL3|F7|CCR7|CCL19|C1QTNF1|MST1R|CSF3|IL6|IGFBP5|F10|ANGPT1|GATA3	http://amigo.geneontology.org/amigo/term/GO:0051897
cell surface receptor signaling pathway	Gene Ontology	GO:0007166	21	160	0.000201425	0.0011292	CBLC|NPR1|LY6E|MYD88|CCR1|INHBA|GP1BA|CD274|CHRM4|BIRC3|F2|LAG3|IFNB1|TNFRSF14|OSMR|IFITM1|CXCL10|STC1|EDN3|EDN2|C5	http://amigo.geneontology.org/amigo/term/GO:0007166
blood circulation	Gene Ontology	GO:0008015	9	39	0.00021998	0.00121481	ACVRL1|NPY4R|OLR1|STAT1|SERPING1|DLL4|NFE2|CXCL10|EDN3	http://amigo.geneontology.org/amigo/term/GO:0008015
defense response	Gene Ontology	GO:0006952	12	66	0.000236442	0.00128653	CD74|TAP1|MX2|HLA-B|MST1R|MX1|INHBA|HCP5|TLR1|CX3CL1|CST3|GATA3	http://amigo.geneontology.org/amigo/term/GO:0006952
response to organic nitrogen	Gene Ontology	GO:0010243	6	18	0.00029493	0.00155892	IL1RN|CDKN1A|TP73|UBD|NNMT|ALDOC	http://amigo.geneontology.org/amigo/term/GO:0010243
fibrinolysis	Gene Ontology	GO:0042730	6	18	0.00029493	0.00155892	F2|PLAUR|GP1BA|PLAT|SERPING1|SERPINE1	http://amigo.geneontology.org/amigo/term/GO:0042730
activation of cysteine-type endopeptidase activity involved in apoptotic process	Gene Ontology	GO:0006919	13	78	0.000323824	0.00168754	TNFSF10|BCL2L13|CASP1|FAS|IFI27|TRADD|XDH|S100A9|RET|PML|PYCARD|BBC3|CASP9	http://amigo.geneontology.org/amigo/term/GO:0006919
negative regulation of blood coagulation	Gene Ontology	GO:0030195	5	13	0.000454769	0.00232668	CYP4F12|CYP4F2|CD34|SERPINE1|VTN	http://amigo.geneontology.org/amigo/term/GO:0030195
cellular response to tumor necrosis factor	Gene Ontology	GO:0071356	11	61	0.000459047	0.00232668	CCL3|GPER1|CCL5|HYAL1|NPNT|GPD1|VCAM1|ICAM1|PYCARD|IL18BP|GATA3	http://amigo.geneontology.org/amigo/term/GO:0071356
platelet degranulation	Gene Ontology	GO:0002576	13	81	0.000473121	0.0023656	IGF2|ACTN2|PECAM1|FN1|SERPINA1|CFD|SERPINE1|SERPING1|FGA|TF|FGG|EGF|FGB	http://amigo.geneontology.org/amigo/term/GO:0002576
response to bacterium	Gene Ontology	GO:0009617	6	20	0.00055984	0.00276188	ERAP1|SLC11A1|MECOM|CD47|NOS2|IL27	http://amigo.geneontology.org/amigo/term/GO:0009617
cellular response to lipopolysaccharide	Gene Ontology	GO:0071222	13	83	0.000602122	0.00293138	LBP|NOS2|TNFRSF1B|CMPK2|PLSCR4|TNFAIP3|CSF3|IL6|ICAM1|PYCARD|CXCL10|CD40|SERPINE1	http://amigo.geneontology.org/amigo/term/GO:0071222
macrophage chemotaxis	Gene Ontology	GO:0048246	5	14	0.00067533	0.00320349	CX3CL1|CCL3|EDN2|SAA1|CCL5	http://amigo.geneontology.org/amigo/term/GO:0048246
regulation of glucose metabolic process	Gene Ontology	GO:0010906	5	14	0.00067533	0.00320349	IGFBP3|C1QTNF1|RORC|PDK4|IGFBP5	http://amigo.geneontology.org/amigo/term/GO:0010906
positive regulation of cell adhesion	Gene Ontology	GO:0045785	8	37	0.000783115	0.00366775	TGM2|CCL5|ITGA2|SAA1|CCR7|ANGPT1|HYAL1|PRKD2	http://amigo.geneontology.org/amigo/term/GO:0045785
positive regulation of T cell proliferation	Gene Ontology	GO:0042102	9	46	0.000807949	0.00373677	EFNB1|CCL5|CD274|CARD11|IL6|VCAM1|CCL19|PDCD1LG2|TNFSF13B	http://amigo.geneontology.org/amigo/term/GO:0042102
O-glycan processing	Gene Ontology	GO:0016266	10	56	0.000893163	0.00407988	ST3GAL3|GCNT4|B3GNT7|GALNT12|B3GNT3|MUC1|MUC17|MUC16|MUC13|ST6GALNAC2	http://amigo.geneontology.org/amigo/term/GO:0016266
positive regulation of interferon-beta production	Gene Ontology	GO:0032728	6	22	0.000979991	0.00442191	DDX58|IRF7|IFIH1|TLR2|TLR3|IRF1	http://amigo.geneontology.org/amigo/term/GO:0032728
DNA damage response, signal transduction by p53 class mediator resulting in induction of apoptosis	Gene Ontology	GO:0042771	7	30	0.00102944	0.00458908	TP63|CDKN1A|NUPR1|TP73|IFI16|PML|PYCARD	http://amigo.geneontology.org/amigo/term/GO:0042771
toll-like receptor signaling pathway	Gene Ontology	GO:0002224	15	110	0.00105922	0.00466563	LBP|ITGB2|IRF7|LGMN|FOS|BIRC3|TLR2|TLR3|CTSS|TLR1|ITGAM|CTSL|MYD88|SARM1|MAP2K6	http://amigo.geneontology.org/amigo/term/GO:0002224
regulation of inflammatory response	Gene Ontology	GO:0050727	9	48	0.001114	0.00484919	CASP4|CASP1|BIRC3|AHSG|ACE2|PYCARD|AGTR1|MYD88|PIK3AP1	http://amigo.geneontology.org/amigo/term/GO:0050727
response to progesterone stimulus	Gene Ontology	GO:0032570	7	31	0.00126703	0.00545117	CD38|NCF2|FOS|JUNB|TLR2|TXNIP|CLDN4	http://amigo.geneontology.org/amigo/term/GO:0032570
organ regeneration	Gene Ontology	GO:0031100	9	50	0.00150757	0.00641152	PTPRU|NNMT|NR4A3|CDKN1A|F7|BAAT|C5AR1|ALDOC|UGT1A1	http://amigo.geneontology.org/amigo/term/GO:0031100
response to starvation	Gene Ontology	GO:0042594	7	32	0.00154543	0.00649784	ACADS|HMGCL|ZFP36|SSTR2|PDK4|ADSSL1|UGT1A1	http://amigo.geneontology.org/amigo/term/GO:0042594
positive regulation of phosphatidylinositol 3-kinase cascade	Gene Ontology	GO:0014068	9	51	0.00174244	0.00724384	ERBB3|F2|AGT|PDGFRB|CCL5|CSF3|GPER1|ANGPT1|PIK3AP1	http://amigo.geneontology.org/amigo/term/GO:0014068
positive regulation of neutrophil chemotaxis	Gene Ontology	GO:0090023	5	17	0.00181678	0.00746898	EDNRA|LBP|CCL19|CD74|CCR7	http://amigo.geneontology.org/amigo/term/GO:0090023
cellular response to interferon-gamma	Gene Ontology	GO:0071346	6	25	0.0020179	0.00820464	CCL3|NOS2|CCL5|IL12RB1|GBP5|TLR3	http://amigo.geneontology.org/amigo/term/GO:0071346
epithelial cell differentiation	Gene Ontology	GO:0030855	11	73	0.00213781	0.00859771	ANXA4|RHCG|MUC1|UPK1A|TCF21|EHF|KRT16|KRT14|ALDOC|TST|GSTK1	http://amigo.geneontology.org/amigo/term/GO:0030855
positive regulation of type I interferon production	Gene Ontology	GO:0032481	10	63	0.00226188	0.00899889	IRF1|IRF7|DHX58|ZBP1|TREX1|TRIM21|IFI16|TRIM15|MYD88|TMEM173	http://amigo.geneontology.org/amigo/term/GO:0032481
toll-like receptor 4 signaling pathway	Gene Ontology	GO:0034142	13	96	0.00237471	0.00934726	LBP|ITGB2|IRF7|FOS|BIRC3|S100A14|TLR2|TLR3|ITGAM|MYD88|SARM1|PIK3AP1|MAP2K6	http://amigo.geneontology.org/amigo/term/GO:0034142
antigen processing and presentation	Gene Ontology	GO:0019882	8	44	0.00255335	0.00994465	CD74|FCGRT|CTSL|HLA-C|MR1|RAET1L|PSMB9|CTSS	http://amigo.geneontology.org/amigo/term/GO:0019882
synaptic transmission, glutamatergic	Gene Ontology	GO:0035249	7	35	0.0026724	0.0102999	CACNA1A|SLC17A7|GRIK5|PLAT|GRIN3B|NAPA|GRIN1	http://amigo.geneontology.org/amigo/term/GO:0035249
positive regulation of smooth muscle cell proliferation	Gene Ontology	GO:0048661	8	45	0.00295778	0.0111875	PDGFRB|TGM2|STAT1|CCL5|ITGA2|NOX1|IL6|MYD88	http://amigo.geneontology.org/amigo/term/GO:0048661
elevation of cytosolic calcium ion concentration	Gene Ontology	GO:0007204	14	110	0.00296318	0.0111875	CD38|CCR1|CACNA1A|C1QTNF1|SAA1|S1PR4|GPER1|CCL28|C5AR1|CCR7|EDNRA|AGTR1|EDN2|OPRL1	http://amigo.geneontology.org/amigo/term/GO:0007204
JAK-STAT cascade	Gene Ontology	GO:0007259	6	27	0.00306874	0.0113543	SOCS1|STAT2|STAT1|STAT5A|IL15RA|NMI	http://amigo.geneontology.org/amigo/term/GO:0007259
drug metabolic process	Gene Ontology	GO:0017144	6	27	0.00306874	0.0113543	PCK1|CYP4F12|UGT1A8|CYP4F2|UGT1A7|UGT1A1	http://amigo.geneontology.org/amigo/term/GO:0017144
innate immune response in mucosa	Gene Ontology	GO:0002227	5	19	0.00311322	0.0114049	H2BFS|NOS2|HIST2H2BE|HIST1H2BJ|HIST1H2BK	http://amigo.geneontology.org/amigo/term/GO:0002227
positive regulation of B cell proliferation	Gene Ontology	GO:0030890	7	36	0.00316185	0.0114695	CD74|CD38|CARD11|CHRNB2|CD40|CDKN1A|TNFSF13B	http://amigo.geneontology.org/amigo/term/GO:0030890
response to ethanol	Gene Ontology	GO:0045471	12	88	0.00324373	0.0116522	IGF2|CHRNB2|ARSA|ABAT|SLC2A4|NTRK1|S100A9|VCAM1|ICAM1|GRIN1|GATA3|ADH6	http://amigo.geneontology.org/amigo/term/GO:0045471
positive regulation of apoptotic process	Gene Ontology	GO:0043065	28	294	0.00363401	0.0125322	FAS|TGM2|TNFSF10|GPER1|IDO1|MAP2K6|TXNIP|SEPT4|IFIT2|UBD|ADAMTSL4|ARHGEF6|GADD45A|ARHGEF4|TRADD|TNFRSF8|PYCARD|GRIN1|NR4A1|NUPR1|IGFBP3|INPP5D|TP73|CASP9|IL6|TLR3|MMP9|NGFR	http://amigo.geneontology.org/amigo/term/GO:0043065
negative regulation of cell proliferation	Gene Ontology	GO:0008285	34	378	0.00365157	0.0125322	PPAP2A|ITGA1|CDKN1A|IFITM1|GPER1|IL6|FBXO2|AGT|IFIT3|IFNL1|DHRS2|NTRK1|INSL3|INHBA|KLF4|TNFRSF8|PML|KISS1|ACVRL1|WARS|TFF1|IGFBP3|DLL4|IRF1|GATA3|POU1F1|PTPRU|IRF6|SFRP5|HNF4A|RARRES3|RARRES1|TLR2|SSTR2	http://amigo.geneontology.org/amigo/term/GO:0008285
positive regulation of tumor necrosis factor production	Gene Ontology	GO:0032760	7	37	0.00371689	0.0125322	CCL3|LBP|CCL19|TLR2|TLR3|PYCARD|MYD88	http://amigo.geneontology.org/amigo/term/GO:0032760
chemokine-mediated signaling pathway	Gene Ontology	GO:0070098	6	28	0.0037258	0.0125322	CCL5|ACKR4|CCR1|CCR7|CXCL11|CXCL10	http://amigo.geneontology.org/amigo/term/GO:0070098
tumor necrosis factor-mediated signaling pathway	Gene Ontology	GO:0033209	6	28	0.0037258	0.0125322	STAT1|TRADD|CARD14|TNFRSF14|TNFRSF8|PYCARD	http://amigo.geneontology.org/amigo/term/GO:0033209
lipopolysaccharide-mediated signaling pathway	Gene Ontology	GO:0031663	6	28	0.0037258	0.0125322	LBP|STAT1|CCL3|CCL5|TLR2|MYD88	http://amigo.geneontology.org/amigo/term/GO:0031663
leukocyte cell-cell adhesion	Gene Ontology	GO:0007159	6	28	0.0037258	0.0125322	ITGB2|OLR1|CCL5|VCAM1|ICAM1|ITGAM	http://amigo.geneontology.org/amigo/term/GO:0007159
aging	Gene Ontology	GO:0007568	14	113	0.0037983	0.012661	IL6|APOD|TNFRSF1B|CNP|FOS|NTRK1|CASP9|SRR|SERPINF1|VCAM1|EDNRA|ALDOC|AGT|NCF2	http://amigo.geneontology.org/amigo/term/GO:0007568
positive regulation of interleukin-8 production	Gene Ontology	GO:0032757	5	20	0.00396434	0.0129806	TLR2|LBP|SERPINE1|PRKD2|TLR3	http://amigo.geneontology.org/amigo/term/GO:0032757
regulation of vasoconstriction	Gene Ontology	GO:0019229	5	20	0.00396434	0.0129806	AGT|ACE2|AGTR1|EDN2|EDN3	http://amigo.geneontology.org/amigo/term/GO:0019229
lipoprotein metabolic process	Gene Ontology	GO:0042157	7	38	0.00434291	0.0140954	PCSK9|OLR1|LDLR|APOL6|APOL3|APOL2|APOL1	http://amigo.geneontology.org/amigo/term/GO:0042157
cellular calcium ion homeostasis	Gene Ontology	GO:0006874	11	80	0.00443588	0.0142719	CCL3|CCL5|RYR1|CCL19|CD40|CACNA1F|CCR1|TNNI3|STC1|GRIN1|C5	http://amigo.geneontology.org/amigo/term/GO:0006874
positive regulation of extrinsic apoptotic signaling pathway	Gene Ontology	GO:2001238	6	29	0.00448166	0.0142949	BCL2L14|TNFSF10|GPER1|PML|PYCARD|AGT	http://amigo.geneontology.org/amigo/term/GO:2001238
positive regulation of angiogenesis	Gene Ontology	GO:0045766	12	92	0.00468735	0.0148232	ERAP1|VASH2|HYAL1|CD34|NTRK1|GATA6|ANGPTL4|PRKD2|C3|CX3CL1|SERPINE1|C5	http://amigo.geneontology.org/amigo/term/GO:0045766
cell-matrix adhesion	Gene Ontology	GO:0007160	11	81	0.00488318	0.0153117	FGG|ITGA2|VTN|NPNT|COL5A3|NID1|ITGB2|FGB|AGT|FGA|FBLN5	http://amigo.geneontology.org/amigo/term/GO:0007160
cellular response to organic substance	Gene Ontology	GO:0071310	5	21	0.00496964	0.0153231	MAP2|CASP1|TIMP3|NR4A1|CD68	http://amigo.geneontology.org/amigo/term/GO:0071310
bile acid biosynthetic process	Gene Ontology	GO:0006699	5	21	0.00496964	0.0153231	ACOX2|AKR1C4|HSD3B7|BAAT|CH25H	http://amigo.geneontology.org/amigo/term/GO:0006699
cellular defense response	Gene Ontology	GO:0006968	9	60	0.00543787	0.0166282	LBP|KLRC3|KLRC2|NCF2|HLA-G|TCIRG1|LGALS3BP|C5AR1|CD300C	http://amigo.geneontology.org/amigo/term/GO:0006968
regulation of cell growth	Gene Ontology	GO:0001558	10	71	0.00549553	0.0166668	KAZALD1|WISP2|BLZF1|TMC8|IGFBP3|IGFBP5|AGTR1|AGT|FBLN5|HTRA3	http://amigo.geneontology.org/amigo/term/GO:0001558
positive regulation of release of sequestered calcium ion into cytosol	Gene Ontology	GO:0051281	5	22	0.00614307	0.0184792	GPER1|EDNRA|F2|CXCL11|CXCL10	http://amigo.geneontology.org/amigo/term/GO:0051281
proteolysis involved in cellular protein catabolic process	Gene Ontology	GO:0051603	6	31	0.00632336	0.0188681	CTSL|LGMN|PSMB10|PSMB9|PSMB8|CTSS	http://amigo.geneontology.org/amigo/term/GO:0051603
response to glucocorticoid stimulus	Gene Ontology	GO:0051384	10	73	0.0066988	0.0198284	BMP6|PTPRU|ACADS|IL1RN|FAS|MDK|PLAT|IL6|SERPINF1|PAPPA	http://amigo.geneontology.org/amigo/term/GO:0051384
positive regulation of phagocytosis	Gene Ontology	GO:0050766	5	23	0.00749824	0.0220186	C3|PYCARD|CD47|AHSG|SLC11A1	http://amigo.geneontology.org/amigo/term/GO:0050766
excretion	Gene Ontology	GO:0007588	7	42	0.00766765	0.0223388	AQP7|CLCNKB|SLC22A18|AGT|SCNN1B|NPHS1|UGT1A7	http://amigo.geneontology.org/amigo/term/GO:0007588
transmembrane transport	Gene Ontology	GO:0055085	46	578	0.00833424	0.0240912	FXYD6|TAP1|TAP2|ANO9|ATP2A3|SLC7A7|SLC2A12|ANO2|SLC5A5|SLC26A9|SLC5A9|CLCNKB|FXYD3|SLC23A1|SLC37A1|SLC11A1|RYR1|SLC9A9|SLC12A7|SCNN1B|ABCD1|SLC6A12|SLC8A2|AQP7|SLC44A3|HK2|SLC13A2|SLC13A5|ATP1B1|TF|SLC15A3|CP|SLC39A5|SLC2A4|ATP4A|SLC22A18|GLRA3|SLC16A3|SLC17A7|SLC22A11|TCIRG1|RHCG|ABCC8|ABCC6|SLC2A9|SLC1A2	http://amigo.geneontology.org/amigo/term/GO:0055085
intracellular receptor mediated signaling pathway	Gene Ontology	GO:0030522	6	33	0.00866078	0.024841	NR4A2|RORC|NR4A1|THRB|NR4A3|NR1H4	http://amigo.geneontology.org/amigo/term/GO:0030522
integrin-mediated signaling pathway	Gene Ontology	GO:0007229	10	76	0.00887509	0.0252599	ITGAX|NEDD9|ITGB2|ITGA1|CD47|CEACAM1|ITGAM|ITGA2|COL16A1|ADAM28	http://amigo.geneontology.org/amigo/term/GO:0007229
execution phase of apoptosis	Gene Ontology	GO:0097194	5	24	0.00904833	0.0255563	CASP4|CASP1|CIDEB|BBC3|CIDEC	http://amigo.geneontology.org/amigo/term/GO:0097194
response to cytokine stimulus	Gene Ontology	GO:0034097	8	54	0.00922711	0.0258639	SERPINA1|TRAFD1|STAT1|FOS|JUNB|OSMR|PML|CXCL16	http://amigo.geneontology.org/amigo/term/GO:0034097
positive regulation of neuron apoptotic process	Gene Ontology	GO:0043525	7	44	0.00990102	0.027506	CCL3|PCSK9|NCF2|ITGA1|GRIK5|CASP9|BBC3	http://amigo.geneontology.org/amigo/term/GO:0043525
sphingolipid biosynthetic process	Gene Ontology	GO:0030148	6	34	0.010036	0.027506	DEGS2|PPAP2A|CERS4|SPTLC3|SGPP2|SPTSSB	http://amigo.geneontology.org/amigo/term/GO:0030148
cellular response to interleukin-1	Gene Ontology	GO:0071347	6	34	0.010036	0.027506	CCL3|CCL5|HYAL1|ICAM1|PYCARD|FGB	http://amigo.geneontology.org/amigo/term/GO:0071347
angiogenesis	Gene Ontology	GO:0001525	20	206	0.0104081	0.0283161	EPHB3|ERAP1|ANG|ANGPTL4|FN1|APOD|MMRN2|SERPINE1|WARS|MMP19|CEACAM1|TYMP|ACVRL1|DLL4|PLCD1|SEMA4A|NOX1|ANGPT1|EGF|PRKD2	http://amigo.geneontology.org/amigo/term/GO:0001525
positive regulation of JNK cascade	Gene Ontology	GO:0046330	8	56	0.0114383	0.0307596	PLCB1|FZD7|GADD45A|CCL19|TLR3|CCR7|PYCARD|MYD88	http://amigo.geneontology.org/amigo/term/GO:0046330
negative regulation of cell migration	Gene Ontology	GO:0030336	10	79	0.0115556	0.0307596	IL1RN|PTPRU|ACVRL1|BST2|IFITM1|SERPINE1|KRT16|IGFBP5|CITED2|DPEP1	http://amigo.geneontology.org/amigo/term/GO:0030336
sphingolipid metabolic process	Gene Ontology	GO:0006665	10	79	0.0115556	0.0307596	DEGS2|CERS4|ARSA|PPAP2A|FA2H|SPTLC3|SMPD3|STS|GAL3ST1|SGPP2	http://amigo.geneontology.org/amigo/term/GO:0006665
positive regulation of calcium ion transport	Gene Ontology	GO:0051928	5	26	0.012783	0.0335441	CCL3|CCR1|P2RX4|CCL4|CCL5	http://amigo.geneontology.org/amigo/term/GO:0051928
regulation of axonogenesis	Gene Ontology	GO:0050770	5	26	0.012783	0.0335441	CACNA1A|GRIN1|NGFR|RET|EPHB3	http://amigo.geneontology.org/amigo/term/GO:0050770
positive regulation of transcription from RNA polymerase II promoter	Gene Ontology	GO:0045944	56	749	0.0131565	0.0340169	SKAP1|HNF1A|GPER1|PAX8|ACVRL1|NLRC5|MESP2|IFNB1|TMEM173|TLR2|DDX58|NANOG|NCOA7|STAT1|SLC11A1|MECOM|THRB|CSRNP1|SERPINE1|INHBA|IFI16|KLF4|JAK3|NR1H4|CITED2|GRIN1|MYD88|TCF21|IGF2|NOS1|JUNB|FOXA3|FOS|NR4A2|CD40|DLL1|POU5F1|HELZ2|ABLIM2|GATA6|CXCL10|TP63|GATA3|POU1F1|BMP6|IRF1|IRF7|ID4|HNF4A|TP73|CSF3|IL6|TLR3|STAT5A|LMO2|PRKD2	http://amigo.geneontology.org/amigo/term/GO:0045944
bile acid metabolic process	Gene Ontology	GO:0008206	6	36	0.013239	0.0340169	ACOX2|BAAT|AKR1C4|HSD3B7|NR1H4|CH25H	http://amigo.geneontology.org/amigo/term/GO:0008206
negative regulation of cell adhesion	Gene Ontology	GO:0007162	6	36	0.013239	0.0340169	ERBB3|ACVRL1|MYO1F|RND1|ANGPT1|DACT2	http://amigo.geneontology.org/amigo/term/GO:0007162
positive regulation of sequence-specific DNA binding transcription factor activity	Gene Ontology	GO:0051091	11	94	0.0145792	0.0370974	DDX58|TRIM38|TRIM15|TRIM31|TRIM21|TRIM22|IL6|FZD4|PYCARD|TRIM5|PRKD2	http://amigo.geneontology.org/amigo/term/GO:0051091
regulation of immune response	Gene Ontology	GO:0050776	20	213	0.0146384	0.0370974	SELL|HLA-G|IFITM1|ITGB2|IRF7|HLA-C|HLA-B|HLA-A|CD34|CD40|HLA-E|HLA-F|C3|B2M|PVRL2|ICAM2|ICAM1|CDH1|CARD11|VCAM1	http://amigo.geneontology.org/amigo/term/GO:0050776
positive regulation of vasoconstriction	Gene Ontology	GO:0045907	5	27	0.0149908	0.0374519	CD38|FGG|FGB|FGA|ICAM1	http://amigo.geneontology.org/amigo/term/GO:0045907
regulation of type I interferon-mediated signaling pathway	Gene Ontology	GO:0060338	5	27	0.0149908	0.0374519	USP18|SOCS1|STAT2|STAT1|IFNB1	http://amigo.geneontology.org/amigo/term/GO:0060338
positive regulation of actin filament polymerization	Gene Ontology	GO:0030838	6	37	0.015082	0.0374519	NPHS1|CSF3|ICAM1|CCR7|PYCARD|CCL26	http://amigo.geneontology.org/amigo/term/GO:0030838
sensory perception of sound	Gene Ontology	GO:0007605	13	121	0.0164027	0.04046	TMPRSS3|SLC52A3|GJB2|FZD4|KCNQ4|CHRNB2|THRB|MYO1A|OTOF|CDH1|USH1C|SPTBN4|USH1G	http://amigo.geneontology.org/amigo/term/GO:0007605
positive regulation of peptidyl-tyrosine phosphorylation	Gene Ontology	GO:0050731	9	72	0.0174317	0.0419007	CD74|IGF2|VTN|AGT|CSF3|IL6|TNFRSF14|ICAM1|ANGPT1	http://amigo.geneontology.org/amigo/term/GO:0050731
positive regulation of mitosis	Gene Ontology	GO:0045840	5	28	0.0174397	0.0419007	IGF2|PDGFRB|EDN3|EGF|BTC	http://amigo.geneontology.org/amigo/term/GO:0045840
hair follicle morphogenesis	Gene Ontology	GO:0031069	5	28	0.0174397	0.0419007	NGFR|TP63|FST|KRT27|IGFBP5	http://amigo.geneontology.org/amigo/term/GO:0031069
positive regulation of protein secretion	Gene Ontology	GO:0050714	5	28	0.0174397	0.0419007	FGG|ANG|FGA|FGB|BMP6	http://amigo.geneontology.org/amigo/term/GO:0050714
platelet activation	Gene Ontology	GO:0030168	19	204	0.0184081	0.043942	IGF2|PECAM1|F2|ACTN2|ENTPD2|FN1|SERPINA1|CFD|GP1BA|CD40|SAA1|SERPINE1|IL6|SERPING1|TF|FGG|EGF|FGA|FGB	http://amigo.geneontology.org/amigo/term/GO:0030168
retina homeostasis	Gene Ontology	GO:0001895	6	39	0.0192865	0.0451646	AIPL1|CNGB1|PIGR|B2M|TF|CDH3	http://amigo.geneontology.org/amigo/term/GO:0001895
positive regulation of interleukin-6 production	Gene Ontology	GO:0032755	6	39	0.0192865	0.0451646	TLR2|LBP|IL6|TLR3|PYCARD|MYD88	http://amigo.geneontology.org/amigo/term/GO:0032755
phagosome maturation	Gene Ontology	GO:0090382	6	39	0.0192865	0.0451646	NCF2|NOS2|SLC11A1|TCIRG1|NOS1|RAB43	http://amigo.geneontology.org/amigo/term/GO:0090382
response to gamma radiation	Gene Ontology	GO:0010332	5	29	0.0201393	0.0468651	PML|CXCL10|GATA3|TP73|TP63	http://amigo.geneontology.org/amigo/term/GO:0010332
collagen catabolic process	Gene Ontology	GO:0030574	9	74	0.0205428	0.0472101	CTSL|MMP13|ADAMTS2|MMP19|COL5A3|MMP9|MMP7|COL16A1|CTSS	http://amigo.geneontology.org/amigo/term/GO:0030574
ossification	Gene Ontology	GO:0001503	9	74	0.0205428	0.0472101	IFITM1|KAZALD1|EXT1|CSF1|CHRDL2|AHSG|MMP9|STC1|RSAD2	http://amigo.geneontology.org/amigo/term/GO:0001503
ion transmembrane transport	Gene Ontology	GO:0034220	17	179	0.0209678	0.0478894	ANO9|FXYD6|CHRNB2|KCNK3|ATP2A3|RYR1|ATP4A|GRIK5|ANO2|ATP1B1|GLRA3|GRIN3B|SCNN1B|GRIN1|CLCNKB|P2RX4|FXYD3	http://amigo.geneontology.org/amigo/term/GO:0034220
negative regulation of inflammatory response	Gene Ontology	GO:0050728	8	63	0.0222781	0.0505699	TNFRSF1B|TNFAIP3|GPER1|ZFP36|KLF4|SERPINF1|SAA1|GATA3	http://amigo.geneontology.org/amigo/term/GO:0050728
regulation of heart contraction	Gene Ontology	GO:0008016	5	30	0.0230983	0.0521119	CYP2J2|S100A1|CACNA1B|DES|THRB	http://amigo.geneontology.org/amigo/term/GO:0008016
protein homotetramerization	Gene Ontology	GO:0051289	7	52	0.0236584	0.0530522	KCNJ2|ACADS|SAMHD1|ACTN2|SRR|ALDOC|TP63	http://amigo.geneontology.org/amigo/term/GO:0051289
protein complex assembly	Gene Ontology	GO:0006461	12	114	0.0238114	0.0530737	CD74|TRAF1|APBA1|CLDN14|SLC7A7|NUPR1|CD40|DMTN|TAPBP|FAS|PML|HLA-DMA	http://amigo.geneontology.org/amigo/term/GO:0006461
arachidonic acid metabolic process	Gene Ontology	GO:0019369	7	53	0.0260033	0.057612	CYP2J2|PTGS1|CYP4F12|GGT5|PLA2G4C|CYP4F2|DPEP1	http://amigo.geneontology.org/amigo/term/GO:0019369
response to cold	Gene Ontology	GO:0009409	5	31	0.0263242	0.0577663	IL6|CXCL10|AGT|GMPR|FOS	http://amigo.geneontology.org/amigo/term/GO:0009409
positive regulation of MAPK cascade	Gene Ontology	GO:0043410	8	65	0.0263851	0.0577663	IGF2|IL6|KISS1|C1QTNF1|GPER1|IGFBP3|AGT|TRIM5	http://amigo.geneontology.org/amigo/term/GO:0043410
cellular amino acid metabolic process	Gene Ontology	GO:0006520	6	42	0.0269852	0.0587325	SDSL|SDS|SLC7A7|MAT1A|SRR|GGT5	http://amigo.geneontology.org/amigo/term/GO:0006520
response to wounding	Gene Ontology	GO:0009611	7	54	0.0285018	0.0616706	MDK|F2|FN1|IL6|CCR1|POU5F1|SLC1A2	http://amigo.geneontology.org/amigo/term/GO:0009611
regulation of cell adhesion	Gene Ontology	GO:0030155	6	43	0.0299452	0.0642392	LAMA2|RET|DLL1|STAT5A|ICAM1|SERPINI1	http://amigo.geneontology.org/amigo/term/GO:0030155
negative regulation of gene expression	Gene Ontology	GO:0010629	9	79	0.0300362	0.0642392	CCL3|NOS2|CDKN1A|CD34|PARP10|XDH|GPER1|CCR1|CITED2	http://amigo.geneontology.org/amigo/term/GO:0010629
DNA damage response, signal transduction by p53 class mediator resulting in cell cycle arrest	Gene Ontology	GO:0006977	8	67	0.0309909	0.0655024	PSMB10|CDKN1A|PSME2|PSME1|PSMB9|PSMB8|PML|MUC1	http://amigo.geneontology.org/amigo/term/GO:0006977
response to calcium ion	Gene Ontology	GO:0051592	7	55	0.0311579	0.0655024	SYT1|IL6|TXNIP|GRIN1|FGG|FGA|FGB	http://amigo.geneontology.org/amigo/term/GO:0051592
negative regulation of angiogenesis	Gene Ontology	GO:0016525	7	55	0.0311579	0.0655024	NPR1|STAT1|SERPINF1|CXCL10|PML|SEMA4A|AGT	http://amigo.geneontology.org/amigo/term/GO:0016525
xenobiotic metabolic process	Gene Ontology	GO:0006805	14	146	0.0316757	0.0662147	CYP2J2|PTGS1|CYP4F2|ADH6|ADH4|CYP4F12|HNF4A|RORC|MAT1A|ALDH2|NNMT|SULT1A1|UGT1A6|UGT1A1	http://amigo.geneontology.org/amigo/term/GO:0006805
small molecule metabolic process	Gene Ontology	GO:0044281	94	1413	0.033139	0.0688844	PTGS1|PCK1|TM7SF2|PPAP2A|CKB|MAT1A|PI4K2B|CYP4F2|AGT|PLIN2|CERS4|B3GNT7|SQRDL|CYP4F12|CACNA1A|SPTLC3|ABCD1|EXT1|HK2|ENPP1|HELZ2|GMPR|INPP5D|HYAL1|SLC2A4|SYT5|ACSL5|ANGPTL4|HSD3B1|CH25H|ACADS|TDO2|TST|DPEP1|XDH|HSD3B7|PIK3R2|DIO2|PLCB1|GLRX|ADSSL1|LGMN|B3GNT3|TCN2|NNMT|HS3ST3B1|CYP2J2|PSMB10|GGT5|SMPD3|AKR1C4|SLC52A3|NT5C3A|SGPP2|SULT1A1|CHST13|LDLR|PLCD1|IDUA|DEGS2|ADH6|ADH4|ACOX2|ALDH2|SLC23A1|P…	http://amigo.geneontology.org/amigo/term/GO:0044281
positive regulation of multicellular organism growth	Gene Ontology	GO:0040018	5	33	0.033603	0.0694587	POU1F1|STAT5A|AGT|SPTBN4|CSF1	http://amigo.geneontology.org/amigo/term/GO:0040018
ion transport	Gene Ontology	GO:0006811	15	163	0.0367804	0.0756041	TMC4|CHRNB2|FAM26E|SLC7A7|SLC26A9|SLC17A7|TMC8|SLC9A9|SLC12A7|PDZD3|SLC5A5|SLC6A12|SLC15A3|SLC8A2|SLC1A2	http://amigo.geneontology.org/amigo/term/GO:0006811
potassium ion transport	Gene Ontology	GO:0006813	9	82	0.0370111	0.0756581	KCNJ2|KCNJ16|KCNQ4|ATP1B1|SLC12A7|ABCC8|KCNN1|KCNK3|KCNC1	http://amigo.geneontology.org/amigo/term/GO:0006813
interaction with host	Gene Ontology	GO:0051701	5	34	0.0376663	0.0761558	TCIRG1|NOS1|NOS2|NCF2|SLC11A1	http://amigo.geneontology.org/amigo/term/GO:0051701
response to exogenous dsRNA	Gene Ontology	GO:0043330	5	34	0.0376663	0.0761558	TLR3|RFTN1|DDX58|STAT1|IFNB1	http://amigo.geneontology.org/amigo/term/GO:0043330
male gonad development	Gene Ontology	GO:0008584	9	83	0.039563	0.0795559	TNFSF10|INHBA|LHX9|NUPR1|INSL3|TLR3|GATA6|CITED2|GATA3	http://amigo.geneontology.org/amigo/term/GO:0008584
humoral immune response	Gene Ontology	GO:0006959	7	58	0.0401049	0.0802097	PSMB10|BST2|IFNB1|IL6|EBI3|GATA3|BLNK	http://amigo.geneontology.org/amigo/term/GO:0006959
negative regulation of neuron apoptotic process	Gene Ontology	GO:0043524	12	124	0.0418918	0.0831152	ERBB3|AGT|LGMN|MDK|NR4A2|CACNA1A|NTRK1|TP73|C5AR1|NR4A3|GRIN1|ANGPT1	http://amigo.geneontology.org/amigo/term/GO:0043524
regulation of actin cytoskeleton organization	Gene Ontology	GO:0032956	5	35	0.0420174	0.0831152	PDGFRB|VANGL2|BST2|MYO1F|DMTN	http://amigo.geneontology.org/amigo/term/GO:0032956
glucose homeostasis	Gene Ontology	GO:0042593	9	84	0.0422315	0.0831152	PCK1|SLC2A4|HNF4A|OAS1|HNF1A|NGFR|IGFBP5|C5|PDK4	http://amigo.geneontology.org/amigo/term/GO:0042593
response to peptide hormone stimulus	Gene Ontology	GO:0043434	6	47	0.0438723	0.0854355	STAT1|NR4A3|JUNB|TFF1|PLAT|STAT5A	http://amigo.geneontology.org/amigo/term/GO:0043434
chloride transport	Gene Ontology	GO:0006821	6	47	0.0438723	0.0854355	ANO9|CLIC3|SLC12A7|SLC26A9|APOL1|FXYD3	http://amigo.geneontology.org/amigo/term/GO:0006821
extracellular matrix disassembly	Gene Ontology	GO:0022617	11	112	0.0457402	0.0886066	CTSL|FN1|MMP13|MMP19|COL5A3|NID1|MMP9|CDH1|MMP7|COL16A1|CTSS	http://amigo.geneontology.org/amigo/term/GO:0022617
extrinsic apoptotic signaling pathway	Gene Ontology	GO:0097191	5	36	0.0466591	0.0899159	PML|TLR3|FAS|TRADD|INHBA	http://amigo.geneontology.org/amigo/term/GO:0097191
cell differentiation	Gene Ontology	GO:0030154	30	395	0.0491278	0.0941828	PIWIL4|SLC2A14|TFF1|MMP19|CHRDL2|PKDCC|MYCBPAP|SMOC1|SEMA4G|MDK|NANOG|MECOM|INHBA|RBM11|ANXA13|ANGPT1|PAPPA|DLL1|CATSPERG|PTPRU|KAZALD1|FAM65B|ETV7|SFRP5|CSF1|TYMP|ANGPTL4|EDAR|HES4|SLFN5	http://amigo.geneontology.org/amigo/term/GO:0030154
somatic stem cell maintenance	Gene Ontology	GO:0035019	5	37	0.051593	0.0978944	PRDM16|POU5F1|VANGL2|CDX2|NANOG	http://amigo.geneontology.org/amigo/term/GO:0035019
positive regulation of interferon-gamma production	Gene Ontology	GO:0032729	5	37	0.051593	0.0978944	IL12RB1|IFNL1|HLA-A|PYCARD|SLC11A1	http://amigo.geneontology.org/amigo/term/GO:0032729
cell junction assembly	Gene Ontology	GO:0034329	8	75	0.0548287	0.102458	CLDN14|KRT14|ARHGEF6|CLDN23|PVRL2|CDH1|CDH3|CADM3	http://amigo.geneontology.org/amigo/term/GO:0034329
T cell costimulation	Gene Ontology	GO:0031295	8	75	0.0548287	0.102458	TNFSF14|CCL19|CARD11|TNFRSF14|CD274|PDCD1LG2|DPP4|TNFSF13B	http://amigo.geneontology.org/amigo/term/GO:0031295
response to nutrient	Gene Ontology	GO:0007584	8	75	0.0548287	0.102458	ARSA|STAT1|HMGCL|CCL28|SSTR2|VCAM1|STC1|UGT1A1	http://amigo.geneontology.org/amigo/term/GO:0007584
apoptotic signaling pathway	Gene Ontology	GO:0097190	11	116	0.0563728	0.104076	CD38|TNFSF10|ARHGEF6|FAS|ARHGEF4|TRADD|CASP10|IFI27|NGFR|BBC3|P2RX4	http://amigo.geneontology.org/amigo/term/GO:0097190
positive regulation of cell migration	Gene Ontology	GO:0030335	12	130	0.056457	0.104076	PDGFRB|LGR6|CCL5|MYO1F|F7|CSF1|RET|GPER1|CCL3|F10|CCL26|CXCL16	http://amigo.geneontology.org/amigo/term/GO:0030335
negative regulation of fat cell differentiation	Gene Ontology	GO:0045599	5	38	0.0568199	0.104076	GPER1|IL6|ID4|GATA3|ENPP1	http://amigo.geneontology.org/amigo/term/GO:0045599
muscle filament sliding	Gene Ontology	GO:0030049	5	38	0.0568199	0.104076	ACTN2|DES|NEB|TNNI3|MYH3	http://amigo.geneontology.org/amigo/term/GO:0030049
positive regulation of endothelial cell proliferation	Gene Ontology	GO:0001938	7	63	0.0584363	0.105987	BMP6|ACVRL1|VASH2|NR4A1|ANG|PRKD2|CCL26	http://amigo.geneontology.org/amigo/term/GO:0001938
negative regulation of cysteine-type endopeptidase activity involved in apoptotic process	Gene Ontology	GO:0043154	7	63	0.0584363	0.105987	SERPINB9|TNFSF14|IFI6|NR4A1|IL6|KLF4|DPEP1	http://amigo.geneontology.org/amigo/term/GO:0043154
kidney development	Gene Ontology	GO:0001822	9	90	0.0607845	0.109709	BMP6|PCSK9|TP73|TCF21|PAX8|SERPINF1|AGTR1|AGT|GATA3	http://amigo.geneontology.org/amigo/term/GO:0001822
negative regulation of catalytic activity	Gene Ontology	GO:0043086	7	64	0.062632	0.112494	PCSK9|ANXA4|CABP1|UGT1A8|SERPINB3|UGT1A7|UGT1A1	http://amigo.geneontology.org/amigo/term/GO:0043086
synaptic transmission	Gene Ontology	GO:0007268	29	389	0.063313	0.113168	KCNC1|GRIK5|ABAT|MYCBPAP|NCALD|CACNA1A|CACNA1B|CHRNB2|KCNK3|SLC6A12|GRIN1|DOC2A|PLCB1|KCNJ16|CNP|ACTN2|ANXA9|KCNQ4|KCNN1|APBA1|KCNJ2|HAP1|SYT1|SLC17A7|SYT5|ALDH2|SNCG|ABCC8|SLC1A2	http://amigo.geneontology.org/amigo/term/GO:0007268
axonogenesis	Gene Ontology	GO:0007409	8	78	0.0661409	0.117091	NTNG2|CNP|FZD7|CACNA1F|MAP2|NKX2-8|SEMA4A|SPTBN4	http://amigo.geneontology.org/amigo/term/GO:0007409
calcium ion transport	Gene Ontology	GO:0006816	8	78	0.0661409	0.117091	CCL3|CCL5|RYR1|CHRNB2|CCR1|ATP2A3|P2RX4|CACNG6	http://amigo.geneontology.org/amigo/term/GO:0006816
response to hydrogen peroxide	Gene Ontology	GO:0042542	5	40	0.0681507	0.120075	TXNIP|PDGFRB|STAT1|OLR1|NR4A3	http://amigo.geneontology.org/amigo/term/GO:0042542
cholesterol metabolic process	Gene Ontology	GO:0008203	7	66	0.0715605	0.125485	LIPC|PCSK9|LDLR|APOBR|APOL2|APOL1|CH25H	http://amigo.geneontology.org/amigo/term/GO:0008203
G-protein coupled receptor signaling pathway	Gene Ontology	GO:0007186	24	317	0.0743457	0.129754	PDGFRB|GPR19|PDGFRL|GPER1|PTAFR|CCR7|EDNRA|AGT|GPR35|GPR37|NPY4R|GPR143|PTGER2|S1PR4|C3|C5|NPR1|ENTPD2|HCAR3|FFAR2|CXCL10|CCL17|ACKR4|AGTR1	http://amigo.geneontology.org/amigo/term/GO:0007186
regulation of cell shape	Gene Ontology	GO:0008360	10	108	0.0758006	0.131672	CCL3|F2|ITGB2|FN1|FMNL1|CDC42EP4|IL6|ICAM1|SEMA4A|DMTN	http://amigo.geneontology.org/amigo/term/GO:0008360
response to retinoic acid	Gene Ontology	GO:0032526	6	54	0.0766667	0.131938	CD38|BMP6|NANOG|PDGFRB|KLF4|SERPINF1	http://amigo.geneontology.org/amigo/term/GO:0032526
response to mechanical stimulus	Gene Ontology	GO:0009612	6	54	0.0766667	0.131938	STAT1|FOS|JUNB|IL6|TXNIP|CITED2	http://amigo.geneontology.org/amigo/term/GO:0009612
phosphatidylinositol-mediated signaling	Gene Ontology	GO:0048015	12	137	0.0773274	0.132459	ERBB3|MOV10|GPR143|CDKN1A|NR4A1|NTRK1|CASP9|PTAFR|PIK3R2|BTC|PDGFRB|EGF	http://amigo.geneontology.org/amigo/term/GO:0048015
positive regulation of cell proliferation	Gene Ontology	GO:0008284	31	429	0.0778318	0.132709	TNFSF13|PDGFRB|CDX2|GPER1|EDNRA|EGF|TNFSF13B|IL6|NANOG|MZB1|INSL3|OSMR|EDN3|EDN2|DPP4|IGF2|CD47|NCCRP1|IL34|FLT3LG|CXCL10|POU1F1|NOX1|F2|ID4|MST1R|CSF1|CSF3|TCIRG1|BTC|ATF3	http://amigo.geneontology.org/amigo/term/GO:0008284
liver development	Gene Ontology	GO:0001889	8	81	0.0787941	0.133733	PCSK9|HMGCL|BAAT|NKX2-8|LSR|GATA6|CITED2|UGT1A1	http://amigo.geneontology.org/amigo/term/GO:0001889
cellular response to cAMP	Gene Ontology	GO:0071320	5	42	0.0806387	0.13562	STC1|DMTN|GPD1|SLC5A5|IGFBP5	http://amigo.geneontology.org/amigo/term/GO:0071320
nucleotide-binding domain, leucine rich repeat containing receptor signaling pathway	Gene Ontology	GO:0035872	5	42	0.0806387	0.13562	TXNIP|PYCARD|MAP2K6|TNFAIP3|CASP1	http://amigo.geneontology.org/amigo/term/GO:0035872
fat cell differentiation	Gene Ontology	GO:0045444	6	55	0.0822392	0.137685	PLCB1|ERAP1|SOCS1|ID4|KLF4|PSMB8	http://amigo.geneontology.org/amigo/term/GO:0045444
lipid metabolic process	Gene Ontology	GO:0006629	13	155	0.0885812	0.147635	IL1RN|APOD|PPAP2A|LIPH|HNF4A|LIPC|PLA1A|ALDH3B1|RDH16|LDLR|PTGS1|APOL2|CH25H	http://amigo.geneontology.org/amigo/term/GO:0006629
post-translational protein modification	Gene Ontology	GO:0043687	16	201	0.0918167	0.152342	ST3GAL3|GCNT4|F2|B3GNT7|GALNT12|ARSA|B3GNT3|PLAUR|MUC1|F7|STS|MUC17|MUC16|F10|MUC13|ST6GALNAC2	http://amigo.geneontology.org/amigo/term/GO:0043687
defense response to bacterium	Gene Ontology	GO:0042742	9	98	0.0925843	0.152929	NOS2|SLC11A1|SLAMF8|IFNB1|TLR3|ISG15|CCL20|S100A9|S100A14	http://amigo.geneontology.org/amigo/term/GO:0042742
lipid transport	Gene Ontology	GO:0006869	6	57	0.0940396	0.154643	APOD|APOL1|APOBR|APOL6|APOL2|STARD4	http://amigo.geneontology.org/amigo/term/GO:0006869
positive regulation of transcription, DNA-dependent	Gene Ontology	GO:0045893	35	503	0.0961332	0.157386	CD38|PLCB1|CDX2|RET|AGT|EGF|MDK|FZD4|CAND2|TP63|FZD7|MECOM|IFNL1|GATA3|INHBA|HNF1A|NFE2|CDH1|CITED2|PRDM16|ACVRL1|FOS|KLF4|EHF|PAX8|POU1F1|IRF1|STAT1|IRF7|IRF6|HNF4G|HNF4A|TP73|IL6|SKAP1	http://amigo.geneontology.org/amigo/term/GO:0045893
positive regulation of osteoblast differentiation	Gene Ontology	GO:0045669	6	58	0.100263	0.163079	TP63|IFITM1|BMP6|ID4|IL6|NPNT	http://amigo.geneontology.org/amigo/term/GO:0045669
skeletal muscle cell differentiation	Gene Ontology	GO:0035914	5	45	0.101479	0.163079	CITED2|NUPR1|ATF3|NR4A1|FOS	http://amigo.geneontology.org/amigo/term/GO:0035914
positive regulation of MAP kinase activity	Gene Ontology	GO:0043406	5	45	0.101479	0.163079	PDGFRB|EDN3|MST1R|CD40|EGF	http://amigo.geneontology.org/amigo/term/GO:0043406
response to cAMP	Gene Ontology	GO:0051591	5	45	0.101479	0.163079	FOS|JUNB|MMP19|STAT1|PLAT	http://amigo.geneontology.org/amigo/term/GO:0051591
cell-cell adhesion	Gene Ontology	GO:0016337	9	100	0.101814	0.163079	PTPRU|ANXA9|CD34|CDH1|ICAM2|ICAM1|KIRREL2|CDH3|VCAM1	http://amigo.geneontology.org/amigo/term/GO:0016337
inner ear morphogenesis	Gene Ontology	GO:0042472	6	59	0.106698	0.16871	USH1G|KCNQ4|GATA3|USH1C|PRRX2|PAX8	http://amigo.geneontology.org/amigo/term/GO:0042472
activation of phospholipase C activity	Gene Ontology	GO:0007202	6	59	0.106698	0.16871	ANG|NTRK1|S1PR4|C5AR1|EDNRA|AGT	http://amigo.geneontology.org/amigo/term/GO:0007202
positive regulation of epithelial cell proliferation	Gene Ontology	GO:0050679	6	59	0.106698	0.16871	BMP6|CCL5|HYAL1|IL6|C5AR1|GRN	http://amigo.geneontology.org/amigo/term/GO:0050679
wound healing	Gene Ontology	GO:0042060	7	73	0.108418	0.170119	ERBB3|PDGFRB|ITGA2|SLC11A1|PLAT|CDH3|VANGL2	http://amigo.geneontology.org/amigo/term/GO:0042060
gluconeogenesis	Gene Ontology	GO:0006094	5	46	0.108968	0.170119	ALDOC|PCK1|GPD1|ATF3|SDS	http://amigo.geneontology.org/amigo/term/GO:0006094
positive regulation of fibroblast proliferation	Gene Ontology	GO:0048146	5	46	0.108968	0.170119	CD74|CDKN1A|AGT|NGFR|BTC	http://amigo.geneontology.org/amigo/term/GO:0048146
complement activation, classical pathway	Gene Ontology	GO:0006958	13	161	0.110423	0.171666	C1RL|CFI|C4BPA|C4BPB|C8G|C3|SERPING1|C4A|C4B|C1R|C1S|C2|C5	http://amigo.geneontology.org/amigo/term/GO:0006958
hemopoiesis	Gene Ontology	GO:0030097	6	60	0.11334	0.175034	ZBTB32|CD34|CSF1|DLL1|IFI16|ANGPT1	http://amigo.geneontology.org/amigo/term/GO:0030097
nucleosome assembly	Gene Ontology	GO:0006334	10	117	0.113535	0.175034	H2BFS|H1F0|HIST1H2BJ|HIST1H2BD|HIST1H2AC|HIST2H2BE|HIST1H2BN|HIST1H2BK|HIST3H2A|HIST1H1C	http://amigo.geneontology.org/amigo/term/GO:0006334
sodium ion transport	Gene Ontology	GO:0006814	7	74	0.11438	0.175604	SLC23A1|SLC13A2|SLC13A5|ATP1B1|SLC38A11|SCNN1B|SLC5A9	http://amigo.geneontology.org/amigo/term/GO:0006814
cellular response to drug	Gene Ontology	GO:0035690	5	47	0.116718	0.178453	TLR3|ADSSL1|MT2A|DPEP1|SLAMF8	http://amigo.geneontology.org/amigo/term/GO:0035690
glucose metabolic process	Gene Ontology	GO:0006006	10	120	0.128104	0.195056	IGF2|APOD|PCK1|HK2|CACNA1A|PFKFB4|OAS1|PDK4|IGFBP5|ALDOC	http://amigo.geneontology.org/amigo/term/GO:0006006
brain development	Gene Ontology	GO:0007420	14	181	0.129232	0.195966	SLC23A1|APOD|HAP1|SFRP5|PLCB1|CKB|AK7|KCNK3|SRR|FZD7|MDGA1|NAPA|FZD4|SEPT4	http://amigo.geneontology.org/amigo/term/GO:0007420
muscle contraction	Gene Ontology	GO:0006936	8	91	0.130584	0.197208	ACTA2|ACTN2|MYOM1|MYOM2|RYR1|ITGA1|DES|HRC	http://amigo.geneontology.org/amigo/term/GO:0006936
positive regulation of gene expression	Gene Ontology	GO:0010628	12	151	0.132131	0.197585	CCL3|CDH3|SLC11A1|C1QTNF1|CD34|CSF1|GPER1|PRDM1|SLC26A9|CITED2|SEC16B|NFIL3	http://amigo.geneontology.org/amigo/term/GO:0010628
cellular lipid metabolic process	Gene Ontology	GO:0044255	12	151	0.132131	0.197585	ACADS|ACOX2|ACSL5|HMGCL|ANGPTL4|GPD1|ELOVL3|HELZ2|FAR2|ABCD1|AGT|PLIN2	http://amigo.geneontology.org/amigo/term/GO:0044255
response to organic cyclic compound	Gene Ontology	GO:0014070	5	49	0.132969	0.197585	CCL19|ALDOC|PLIN2|ITGA2|ICAM1	http://amigo.geneontology.org/amigo/term/GO:0014070
sensory perception of pain	Gene Ontology	GO:0019233	5	49	0.132969	0.197585	EDNRA|GRIN1|CHRNB2|P2RX4|OPRL1	http://amigo.geneontology.org/amigo/term/GO:0019233
cell-cell junction organization	Gene Ontology	GO:0045216	6	63	0.134475	0.198231	CLDN14|CLDN23|PVRL2|CDH1|CDH3|CADM3	http://amigo.geneontology.org/amigo/term/GO:0045216
negative regulation of NF-kappaB transcription factor activity	Gene Ontology	GO:0032088	6	63	0.134475	0.198231	TRIM21|TNFAIP3|KLF4|PARP10|NLRC5|PYCARD	http://amigo.geneontology.org/amigo/term/GO:0032088
negative regulation of cell growth	Gene Ontology	GO:0030308	10	122	0.138352	0.203136	NPR1|ACVRL1|HYAL1|HNF4A|ENPP1|INHBA|BST2|PML|AGT|CDKN1A	http://amigo.geneontology.org/amigo/term/GO:0030308
response to estradiol stimulus	Gene Ontology	GO:0032355	7	78	0.139883	0.203766	IGF2|SERPINA1|CD38|PDGFRB|TFF1|CASP9|TXNIP	http://amigo.geneontology.org/amigo/term/GO:0032355
lipid catabolic process	Gene Ontology	GO:0016042	7	78	0.139883	0.203766	PLCB1|LIPH|RARRES3|PLA1A|PNPLA1|HRASLS2|PLCD1	http://amigo.geneontology.org/amigo/term/GO:0016042
protein dephosphorylation	Gene Ontology	GO:0006470	9	108	0.143708	0.208385	PTPRN2|PTPRU|PPAP2A|LHPP|DAPP1|PPM1K|DUSP16|DUSP10|PTPRH	http://amigo.geneontology.org/amigo/term/GO:0006470
cell proliferation	Gene Ontology	GO:0008283	24	344	0.14418	0.208385	CD74|IGSF8|ITGA2|CD34|PRG4|EDNRA|TNFSF13B|NANOG|INSL4|BLZF1|IFI16|OSMR|CITED2|CHRM4|EHF|LAMP3|BST2|RETNLB|CSF1|KRT16|LHX9|ISG20|SERPINF1|IL15RA	http://amigo.geneontology.org/amigo/term/GO:0008283
cellular nitrogen compound metabolic process	Gene Ontology	GO:0034641	14	185	0.146044	0.210258	TDO2|PSMB9|CKB|SQRDL|PSME2|MAT1A|PSME1|PSMB10|IDO1|SLC5A5|DIO2|PSMB8|HAO1|TST	http://amigo.geneontology.org/amigo/term/GO:0034641
B cell differentiation	Gene Ontology	GO:0030183	6	65	0.149524	0.214434	POU1F1|JAK3|NTRK1|IFNB1|VCAM1|BLNK	http://amigo.geneontology.org/amigo/term/GO:0030183
regulation of cellular amino acid metabolic process	Gene Ontology	GO:0006521	5	51	0.15017	0.214529	PSMB10|PSMB8|PSME2|PSMB9|PSME1	http://amigo.geneontology.org/amigo/term/GO:0006521
toll-like receptor 3 signaling pathway	Gene Ontology	GO:0034138	7	80	0.153583	0.21856	IRF7|FOS|BIRC3|TLR3|RFTN1|MAP2K6|SARM1	http://amigo.geneontology.org/amigo/term/GO:0034138
fatty acid biosynthetic process	Gene Ontology	GO:0006633	5	52	0.159105	0.22469	AGMO|DEGS2|LIPC|FA2H|CH25H	http://amigo.geneontology.org/amigo/term/GO:0006633
single fertilization	Gene Ontology	GO:0007338	5	52	0.159105	0.22469	ADAM21|MST1R|CATSPERG|IGSF8|AKAP3	http://amigo.geneontology.org/amigo/term/GO:0007338
T cell receptor signaling pathway	Gene Ontology	GO:0050852	8	96	0.161727	0.227525	INPP5D|BTN3A1|CARD11|SKAP1|THEMIS2|PIK3R2|GATA3|PRKD2	http://amigo.geneontology.org/amigo/term/GO:0050852
complement activation	Gene Ontology	GO:0006956	12	158	0.16591	0.232526	CFHR1|CFH|CFD|CFB|MASP1|C1S|C4A|C4B|C1R|C3|C2|C5	http://amigo.geneontology.org/amigo/term/GO:0006956
neurotransmitter secretion	Gene Ontology	GO:0007269	5	53	0.168249	0.234914	SLC6A12|CACNA1B|SLC17A7|ABAT|SYT1	http://amigo.geneontology.org/amigo/term/GO:0007269
palate development	Gene Ontology	GO:0060021	6	68	0.173428	0.241234	PRDM16|EPHB3|CSRNP1|INHBA|PKDCC|TCF21	http://amigo.geneontology.org/amigo/term/GO:0060021
fatty acid metabolic process	Gene Ontology	GO:0006631	5	55	0.18713	0.258351	C3|UGT1A8|ACSF2|BAAT|STAT5A	http://amigo.geneontology.org/amigo/term/GO:0006631
digestion	Gene Ontology	GO:0007586	5	55	0.18713	0.258351	UGT1A1|SSTR2|NPY4R|TFF1|CTSE	http://amigo.geneontology.org/amigo/term/GO:0007586
multicellular organismal development	Gene Ontology	GO:0007275	31	474	0.189928	0.261239	PIWIL4|SLC2A14|HHAT|SMPD3|MYCBPAP|CRABP1|INSL4|ADAMTS9|PLEKHB1|RBM11|NFE2|DLX4|EDN3|APOL2|IGF2|ITGB2|PRR15|EHF|EBF4|SERPINF1|CATSPERG|PLXNC1|F2|KAZALD1|SEMA3F|LMO2|CCL17|MST1R|DKK3|CSF3|BST2	http://amigo.geneontology.org/amigo/term/GO:0007275
negative regulation of apoptotic process	Gene Ontology	GO:0043066	31	475	0.1931	0.264618	CD74|CD38|AIPL1|PSMB10|BIRC7|CDKN1A|BIRC3|NGFR|EDNRA|IFIT3|DPEP1|ANXA4|TP63|FAS|DHRS2|INSL3|CITED2|ANGPT1|PDGFRB|BTC|PSME2|PSME1|SERPINB9|GATA6|CARD14|IL1RN|MYD88|IL6|ANGPTL4|PSMB9|PSMB8	http://amigo.geneontology.org/amigo/term/GO:0043066
cytoskeleton organization	Gene Ontology	GO:0007010	8	101	0.195969	0.266787	CCL3|KISS1|NEDD9|DES|DMTN|KRT16|PVRL2|VILL	http://amigo.geneontology.org/amigo/term/GO:0007010
DNA damage response, signal transduction resulting in induction of apoptosis	Gene Ontology	GO:0008630	5	56	0.196846	0.266787	PML|CIDEB|TNFRSF1B|TP73|CASP9	http://amigo.geneontology.org/amigo/term/GO:0008630
potassium ion transmembrane transport	Gene Ontology	GO:0071805	5	56	0.196846	0.266787	CNGB1|KCNJ2|ABCC8|KCNJ16|KCNN1	http://amigo.geneontology.org/amigo/term/GO:0071805
steroid metabolic process	Gene Ontology	GO:0008202	5	57	0.206731	0.278147	AKR1C4|UGT1A8|UGT1A1|LGMN|HSD3B1	http://amigo.geneontology.org/amigo/term/GO:0008202
cellular response to retinoic acid	Gene Ontology	GO:0071300	5	57	0.206731	0.278147	MUC1|FZD7|FZD4|RET|PTK6	http://amigo.geneontology.org/amigo/term/GO:0071300
positive regulation of protein phosphorylation	Gene Ontology	GO:0001934	8	103	0.210441	0.282113	IGF2|F2|CD40|CARD14|GPER1|IL34|C3|EDNRA	http://amigo.geneontology.org/amigo/term/GO:0001934
positive regulation of cell growth	Gene Ontology	GO:0030307	6	73	0.216395	0.288514	CD38|F2|HYAL1|KRT17|S100A9|CXCL16	http://amigo.geneontology.org/amigo/term/GO:0030307
positive regulation of signal transduction	Gene Ontology	GO:0009967	5	58	0.216775	0.288514	SH3BGRL|CHN2|SKAP1|GATA3|BLNK	http://amigo.geneontology.org/amigo/term/GO:0009967
axon guidance	Gene Ontology	GO:0007411	22	334	0.227901	0.302234	EFNB1|ITGA1|ITGA2|NGFR|SEMA4A|SPTBN4|CACNA1I|NTRK1|EPHB3|LAMA2|EXT1|NR4A3|COL5A3|FLRT3|ABLIM2|GATA3|PLXNC1|SEMA3B|SEMA3F|PLXNA2|ST8SIA4|RND1	http://amigo.geneontology.org/amigo/term/GO:0007411
exocytosis	Gene Ontology	GO:0006887	6	75	0.234517	0.309898	SYTL5|CCL3|CCL5|CCR1|EXOC3L4|EXOC3L1	http://amigo.geneontology.org/amigo/term/GO:0006887
response to estrogen stimulus	Gene Ontology	GO:0043627	5	60	0.237297	0.312455	GATA6|CITED2|ARSA|GATA3|F7	http://amigo.geneontology.org/amigo/term/GO:0043627
peptidyl-tyrosine phosphorylation	Gene Ontology	GO:0018108	7	91	0.238588	0.313041	PDGFRB|IL12RB1|NTRK1|RET|STAT5A|JAK3|EGF	http://amigo.geneontology.org/amigo/term/GO:0018108
organ morphogenesis	Gene Ontology	GO:0009887	7	92	0.246991	0.321645	IGF2|ITGAX|ETV7|ITGA2|CDX2|THRB|APLP1	http://amigo.geneontology.org/amigo/term/GO:0009887
antigen processing and presentation of exogenous peptide antigen via MHC class II	Gene Ontology	GO:0019886	7	92	0.246991	0.321645	CD74|CTSL|LGMN|CTSE|HLA-DOB|CTSS|HLA-DMA	http://amigo.geneontology.org/amigo/term/GO:0019886
regulation of gene expression	Gene Ontology	GO:0010468	5	61	0.247754	0.321645	POU5F1|APBA1|TSKU|NANOG|NGFR	http://amigo.geneontology.org/amigo/term/GO:0010468
phospholipid metabolic process	Gene Ontology	GO:0006644	11	157	0.252728	0.326955	PCSK9|INPP5D|RARRES3|PLA2G4C|SLC44A3|GPD1|PIK3R2|PLCD1|GATA6|PI4K2B|PLA2G4E	http://amigo.geneontology.org/amigo/term/GO:0006644
homophilic cell adhesion	Gene Ontology	GO:0007156	10	141	0.254444	0.328029	PCDH12|CDH16|PCDH1|CDHR5|RET|CEACAM1|PVRL2|CDH1|CDH3|CADM3	http://amigo.geneontology.org/amigo/term/GO:0007156
glucose transport	Gene Ontology	GO:0015758	5	62	0.258325	0.331876	HK2|EDNRA|SLC2A4|SLC2A12|SLC2A9	http://amigo.geneontology.org/amigo/term/GO:0015758
nucleobase-containing small molecule metabolic process	Gene Ontology	GO:0055086	6	78	0.26252	0.333788	NT5C3A|XDH|TYMP|GLRX|ADSSL1|GMPR	http://amigo.geneontology.org/amigo/term/GO:0055086
epidermis development	Gene Ontology	GO:0008544	6	78	0.26252	0.333788	KRT2|KRT17|KRT16|KRT14|EDAR|STS	http://amigo.geneontology.org/amigo/term/GO:0008544
MyD88-independent toll-like receptor signaling pathway	Gene Ontology	GO:0002756	6	78	0.26252	0.333788	IRF7|FOS|BIRC3|TLR3|MAP2K6|SARM1	http://amigo.geneontology.org/amigo/term/GO:0002756
transmembrane receptor protein tyrosine kinase signaling pathway	Gene Ontology	GO:0007169	5	63	0.269002	0.340859	ERBB3|MST1R|NTRK1|RET|BLNK	http://amigo.geneontology.org/amigo/term/GO:0007169
osteoblast differentiation	Gene Ontology	GO:0001649	7	96	0.281448	0.354203	IGF2|BMP6|CCL3|JUNB|TMEM119|IGFBP5|RRBP1	http://amigo.geneontology.org/amigo/term/GO:0001649
protein glycosylation	Gene Ontology	GO:0006486	7	96	0.281448	0.354203	B3GALT4|ST3GAL3|EXT1|B3GNT3|ST8SIA4|OAS2|ST6GALNAC2	http://amigo.geneontology.org/amigo/term/GO:0006486
negative regulation of ubiquitin-protein ligase activity involved in mitotic cell cycle	Gene Ontology	GO:0051436	5	65	0.290627	0.363284	PSMB10|PSME2|PSME1|PSMB9|PSMB8	http://amigo.geneontology.org/amigo/term/GO:0051436
cellular iron ion homeostasis	Gene Ontology	GO:0006879	5	65	0.290627	0.363284	TCIRG1|TF|CP|SCARA5|SLC11A1	http://amigo.geneontology.org/amigo/term/GO:0006879
receptor-mediated endocytosis	Gene Ontology	GO:0006898	5	66	0.301554	0.375673	LGALS3BP|ASGR1|LDLR|CXCL16|SCARA5	http://amigo.geneontology.org/amigo/term/GO:0006898
negative regulation of transforming growth factor beta receptor signaling pathway	Gene Ontology	GO:0030512	5	67	0.312543	0.388056	MECOM|PRDM16|SKOR1|PBLD|HTRA3	http://amigo.geneontology.org/amigo/term/GO:0030512
glycosaminoglycan metabolic process	Gene Ontology	GO:0030203	8	117	0.321093	0.39734	ST3GAL3|CHST13|B3GNT7|EXT1|B3GNT3|HYAL1|HS3ST3B1|IDUA	http://amigo.geneontology.org/amigo/term/GO:0030203
cartilage development	Gene Ontology	GO:0051216	5	68	0.323583	0.399086	BMP6|HYAL1|PRRX2|CHRDL2|MMP13	http://amigo.geneontology.org/amigo/term/GO:0051216
negative regulation of transcription from RNA polymerase II promoter	Gene Ontology	GO:0000122	34	565	0.330299	0.406016	CDX2|FST|TXNIP|TP63|SIK1|STAT1|SAMD11|THRB|ZFP36|IFI16|KLF4|NFIL3|NR1H4|CITED2|ZBTB32|S100A1|TCF21|POU1F1|ZMYND8|TRIM29|DLL4|HEXIM2|GATA6|NANOG|PRDM16|ZBTB42|IRF7|ID4|TP73|FOXA3|PRDM1|TBX6|HES7|SKOR1	http://amigo.geneontology.org/amigo/term/GO:0000122
positive regulation of ubiquitin-protein ligase activity involved in mitotic cell cycle	Gene Ontology	GO:0051437	5	71	0.356917	0.437282	PSMB10|PSME1|PSME2|PSMB9|PSMB8	http://amigo.geneontology.org/amigo/term/GO:0051437
cellular response to hypoxia	Gene Ontology	GO:0071456	6	89	0.370552	0.45249	CA9|KCNK3|ICAM1|GATA6|STC1|BBC3	http://amigo.geneontology.org/amigo/term/GO:0071456
toll-like receptor 9 signaling pathway	Gene Ontology	GO:0034162	5	73	0.379218	0.460035	MYD88|IRF7|MAP2K6|PIK3AP1|FOS	http://amigo.geneontology.org/amigo/term/GO:0034162
toll-like receptor 2 signaling pathway	Gene Ontology	GO:0034134	5	73	0.379218	0.460035	TLR2|MYD88|MAP2K6|PIK3AP1|FOS	http://amigo.geneontology.org/amigo/term/GO:0034134
transforming growth factor beta receptor signaling pathway	Gene Ontology	GO:0007179	8	125	0.388656	0.469944	PDGFRB|ACVRL1|CGN|JUNB|PML|CITED2|SERPINE1|FOS	http://amigo.geneontology.org/amigo/term/GO:0007179
cell migration	Gene Ontology	GO:0016477	8	126	0.397175	0.47868	PDGFRB|ANG|PARP9|PTK6|EPHB3|MDK|CEACAM1|NOX1	http://amigo.geneontology.org/amigo/term/GO:0016477
anatomical structure morphogenesis	Gene Ontology	GO:0009653	6	92	0.400613	0.480756	SFRP5|DKK3|GATA3|POU5F1|TBX6|PAX8	http://amigo.geneontology.org/amigo/term/GO:0009653
regulation of ubiquitin-protein ligase activity involved in mitotic cell cycle	Gene Ontology	GO:0051439	5	75	0.401497	0.480756	PSMB10|PSME2|PSME1|PSMB9|PSMB8	http://amigo.geneontology.org/amigo/term/GO:0051439
oxidation-reduction process	Gene Ontology	GO:0055114	9	144	0.403054	0.481064	ALDH3B1|CYGB|CYP4F12|DHRS2|NOX1|DDO|VCAM1|CYP4F2|GSTK1	http://amigo.geneontology.org/amigo/term/GO:0055114
TRIF-dependent toll-like receptor signaling pathway	Gene Ontology	GO:0035666	5	76	0.412605	0.490881	BIRC3|TLR3|IRF7|MAP2K6|FOS	http://amigo.geneontology.org/amigo/term/GO:0035666
canonical Wnt receptor signaling pathway	Gene Ontology	GO:0060070	5	77	0.423683	0.502445	DISC1|PTPRU|FZD4|CDH3|FZD7	http://amigo.geneontology.org/amigo/term/GO:0060070
skeletal system development	Gene Ontology	GO:0001501	8	130	0.431235	0.509766	IGF2|TP63|EXT1|BMP6|PKDCC|AHSG|MMP9|HES7	http://amigo.geneontology.org/amigo/term/GO:0001501
activation of MAPK activity	Gene Ontology	GO:0000187	6	96	0.440528	0.519093	CD74|ITGA1|TP73|C5AR1|MAP2K6|C5	http://amigo.geneontology.org/amigo/term/GO:0000187
cell cycle arrest	Gene Ontology	GO:0007050	8	132	0.448202	0.526459	IRF1|IRF6|GADD45A|CDKN1A|TP73|INHBA|MAP2K6|PML	http://amigo.geneontology.org/amigo/term/GO:0007050
anaphase-promoting complex-dependent proteasomal ubiquitin-dependent protein catabolic process	Gene Ontology	GO:0031145	5	80	0.456651	0.534687	PSMB8|PSME2|PSME1|PSMB9|PSMB10	http://amigo.geneontology.org/amigo/term/GO:0031145
G1/S transition of mitotic cell cycle	Gene Ontology	GO:0000082	9	151	0.458835	0.535549	PSMB10|CDKN1A|PSMB8|PSME2|PSME1|INHBA|PSMB9|GPR132|ID4	http://amigo.geneontology.org/amigo/term/GO:0000082
cellular component movement	Gene Ontology	GO:0006928	6	98	0.460306	0.535576	IGSF8|CCL4|AKAP3|PLAUR|ITGA2|MST1R	http://amigo.geneontology.org/amigo/term/GO:0006928
metabolic process	Gene Ontology	GO:0008152	7	116	0.463004	0.53655	NAT8|APOBEC3B|CCR1|DNAH17|PLA2G4C|EDNRA|TRABD2B	http://amigo.geneontology.org/amigo/term/GO:0008152
small GTPase mediated signal transduction	Gene Ontology	GO:0007264	20	348	0.464043	0.53655	RAB37|RASGEF1B|RND1|RHEBL1|TAGAP|DIRAS3|RRAD|RASGRP3|ARHGEF4|ARL14|RHOV|NTRK1|ARHGAP30|CHN2|RAB20|ARHGEF6|RAB43|HMHA1|ARL17B|PIK3R2	http://amigo.geneontology.org/amigo/term/GO:0007264
locomotory behavior	Gene Ontology	GO:0007626	5	81	0.467528	0.537221	C1QL1|CACNA1B|CHRNB2|APBA1|ABAT	http://amigo.geneontology.org/amigo/term/GO:0007626
post-embryonic development	Gene Ontology	GO:0009791	5	81	0.467528	0.537221	MECOM|NR4A2|GATA3|TP73|CSRNP1	http://amigo.geneontology.org/amigo/term/GO:0009791
nervous system development	Gene Ontology	GO:0007399	16	278	0.472886	0.541696	DOC2A|MDK|NRN1|IGSF8|FOS|GJB1|PCDH1|SDCBP2|ST8SIA4|INHBA|APLP1|APBA1|FGF11|ITM2B|HES4|SEMA4G	http://amigo.geneontology.org/amigo/term/GO:0007399
regulation of insulin secretion	Gene Ontology	GO:0050796	5	82	0.478337	0.546248	ABCC8|NOS2|HNF4A|SYT5|CACNA1A	http://amigo.geneontology.org/amigo/term/GO:0050796
carbohydrate metabolic process	Gene Ontology	GO:0005975	20	354	0.49539	0.563982	ST3GAL3|ABCC8|CHST13|PCK1|EXT1|GCNT4|HK2|B3GNT3|HYAL1|SLC2A4|PFKFB4|ALDH2|TFF1|B3GNT7|DHDH|HS3ST3B1|HEXDC|ALDOC|HYAL4|IDUA	http://amigo.geneontology.org/amigo/term/GO:0005975
neuron differentiation	Gene Ontology	GO:0030182	5	84	0.499725	0.567173	EDN3|PCSK9|FZD4|NAPA|FZD7	http://amigo.geneontology.org/amigo/term/GO:0030182
visual perception	Gene Ontology	GO:0007601	11	193	0.50455	0.570897	SFRP5|TIMP3|AIPL1|GPR143|CNGB1|CYP4V2|CHRNB2|CACNA1F|DLL4|ABCC6|CDH3	http://amigo.geneontology.org/amigo/term/GO:0007601
regulation of small GTPase mediated signal transduction	Gene Ontology	GO:0051056	9	160	0.529036	0.596779	RASGEF1B|TAGAP|ARHGEF6|ARHGEF4|RHOV|ARHGAP30|CHN2|PIK3R2|HMHA1	http://amigo.geneontology.org/amigo/term/GO:0051056
muscle organ development	Gene Ontology	GO:0007517	5	87	0.531148	0.59734	CXCL10|LAMA2|NEB|FAM65B|MYH3	http://amigo.geneontology.org/amigo/term/GO:0007517
Notch signaling pathway	Gene Ontology	GO:0007219	7	124	0.533962	0.598685	MDK|MOV10|TP63|DLL1|DLL4|MESP2|HES7	http://amigo.geneontology.org/amigo/term/GO:0007219
fibroblast growth factor receptor signaling pathway	Gene Ontology	GO:0008543	9	163	0.551752	0.616762	ERBB3|MOV10|PDGFRB|CDKN1A|NR4A1|CASP9|PIK3R2|BTC|EGF	http://amigo.geneontology.org/amigo/term/GO:0008543
cellular protein modification process	Gene Ontology	GO:0006464	6	110	0.573925	0.639616	TTLL6|ST8SIA4|PLAT|UBE2L6|UBA7|FBXO2	http://amigo.geneontology.org/amigo/term/GO:0006464
transcription initiation from RNA polymerase II promoter	Gene Ontology	GO:0006367	10	186	0.583798	0.648664	JUNB|NR4A2|THRB|HNF4G|NR4A1|HNF4A|RORC|NR4A3|NR1H4|SERPINE1	http://amigo.geneontology.org/amigo/term/GO:0006367
regulation of cell cycle	Gene Ontology	GO:0051726	5	93	0.591135	0.65485	MECOM|PLCB1|IRF1|JUNB|MX2	http://amigo.geneontology.org/amigo/term/GO:0051726
epidermal growth factor receptor signaling pathway	Gene Ontology	GO:0007173	10	191	0.617633	0.682161	PDGFRB|MOV10|ERBB3|CDKN1A|NR4A1|CASP9|PIGR|PIK3R2|BTC|EGF	http://amigo.geneontology.org/amigo/term/GO:0007173
intracellular signal transduction	Gene Ontology	GO:0035556	20	379	0.620604	0.683403	NPR1|IFITM1|SIK1|ASB4|PLCB1|ARHGEF4|PLCD1|RASAL1|CHN2|FLRT3|HMHA1|JAK3|IGFBP5|PLA2G4C|INPP5D|CORO2A|S100A1|SDCBP2|PRKD2|BLNK	http://amigo.geneontology.org/amigo/term/GO:0035556
protein ubiquitination	Gene Ontology	GO:0016567	14	269	0.632947	0.694474	BIRC7|SOCS1|NUB1|RNF43|TRIM31|BIRC3|TRIM21|TRIM22|UBD|UBA7|FBXO2|NEURL3|RNF19B|RNF213	http://amigo.geneontology.org/amigo/term/GO:0016567
protein polyubiquitination	Gene Ontology	GO:0000209	6	117	0.634411	0.694474	PSMB10|PSME2|TRIM21|PSME1|PSMB9|PSMB8	http://amigo.geneontology.org/amigo/term/GO:0000209
nerve growth factor receptor signaling pathway	Gene Ontology	GO:0048011	14	273	0.654728	0.714192	PDGFRB|MOV10|ERBB3|ARHGEF6|ARHGEF4|NR4A1|NTRK1|CASP9|CDKN1A|NGFR|BTC|MYD88|EGF|PIK3R2	http://amigo.geneontology.org/amigo/term/GO:0048011
transport	Gene Ontology	GO:0006810	18	349	0.656285	0.714192	CACNA1I|GJB1|ATP4A|ATP2A3|CNGB1|SLC7A7|SLC13A2|GJB2|ATP1B1|CACNA1B|SLC12A7|MFSD12|SLC5A5|ABCD1|SLC6A12|ABCC6|CLCNKB|P2RX4	http://amigo.geneontology.org/amigo/term/GO:0006810
GTP catabolic process	Gene Ontology	GO:0006184	7	142	0.676971	0.734543	RHEBL1|RRAD|MX2|RND1|GTPBP1|RAB43|SEPT4	http://amigo.geneontology.org/amigo/term/GO:0006184
in utero embryonic development	Gene Ontology	GO:0001701	11	220	0.678959	0.734546	PDGFRB|LY6E|ACVRL1|APBA1|MECOM|INSL3|GATA6|EDNRA|ANGPT1|GATA3|C5	http://amigo.geneontology.org/amigo/term/GO:0001701
neuron migration	Gene Ontology	GO:0001764	5	104	0.689101	0.743345	NR4A2|DISC1|GPM6A|MDGA1|GATA3	http://amigo.geneontology.org/amigo/term/GO:0001764
protein homooligomerization	Gene Ontology	GO:0051260	8	166	0.705987	0.757176	TGM2|KCNC1|SYT1|C1QTNF1|ANGPTL4|FAS|CDH1|P2RX4	http://amigo.geneontology.org/amigo/term/GO:0051260
regulation of transcription from RNA polymerase II promoter	Gene Ontology	GO:0006357	14	283	0.706015	0.757176	STAT1|ETV7|FOS|BLZF1|JUNB|HNF4A|ID4|EHF|INHBA|STAT5A|HNF1A|NFE2|HNF4G|STAT2	http://amigo.geneontology.org/amigo/term/GO:0006357
cell death	Gene Ontology	GO:0008219	10	207	0.715602	0.765239	OPTN|OLR1|GJB1|CACNA1A|TREX1|FA2H|ANG|GRN|SERPINI1|PRKD2	http://amigo.geneontology.org/amigo/term/GO:0008219
viral reproduction	Gene Ontology	GO:0016032	28	555	0.723138	0.77107	IFIH1|PSMB10|HLA-C|HLA-B|HLA-A|B2M|SEPT6|RSAD2|DDX58|STAT2|DHX58|AMBP|ISG15|PML|ACY3|ITGA2|PSME2|TRIM22|PSME1|LDLR|VCAM1|STAT1|IL2RG|APOBEC3G|TNFRSF14|PSMB9|PSMB8|TRIM5	http://amigo.geneontology.org/amigo/term/GO:0016032
central nervous system development	Gene Ontology	GO:0007417	5	109	0.727956	0.773976	NGFR|SERPINI1|PAX8|ARSA|CITED2	http://amigo.geneontology.org/amigo/term/GO:0007417
transcription from RNA polymerase II promoter	Gene Ontology	GO:0006366	20	407	0.741437	0.786051	POU1F1|NMI|IRF1|STAT1|IRF7|TRIM29|ETV7|FOS|NFE2L3|CDX2|FOXA3|EHF|NKX2-8|KLF4|POU5F1|NFIL3|GATA6|ZBTB32|GATA3|XBP1	http://amigo.geneontology.org/amigo/term/GO:0006366
chromatin organization	Gene Ontology	GO:0006325	5	112	0.749525	0.792355	HIST1H2BD|HIST1H2BN|HIST2H2BE|HIST1H2BJ|HIST1H2BK	http://amigo.geneontology.org/amigo/term/GO:0006325
cell cycle	Gene Ontology	GO:0007049	10	214	0.752956	0.793714	SIK1|KLK10|KLLN|RASSF4|TRIM21|GPER1|SMPD3|TXNIP|SEPT4|SEPT6	http://amigo.geneontology.org/amigo/term/GO:0007049
cellular protein metabolic process	Gene Ontology	GO:0044267	26	530	0.767197	0.806429	ST3GAL3|MMP13|PLAUR|STS|MBOAT4|AGT|XBP1|GCNT4|B3GNT7|B3GNT3|IGF2|MUC1|PAPPA|IGFBP3|IGFBP5|MUC17|MUC16|F10|MUC13|ST6GALNAC2|F2|GALNT12|ARSA|F7|ACE2|ATF3	http://amigo.geneontology.org/amigo/term/GO:0044267
spermatogenesis	Gene Ontology	GO:0007283	15	346	0.867907	0.909705	AQP7|PIWIL4|ADAMTS2|TDRD7|SPAG4|SLC2A14|AK7|INSL3|FOXA3|SSTR2|MYCBPAP|GAL3ST1|BIRC3|CATSPERG|ADAM28	http://amigo.geneontology.org/amigo/term/GO:0007283
Wnt receptor signaling pathway	Gene Ontology	GO:0016055	6	157	0.872654	0.912096	NKD1|LGR6|FZD4|RNF43|DKK3|TRABD2B	http://amigo.geneontology.org/amigo/term/GO:0016055
protein autophosphorylation	Gene Ontology	GO:0046777	6	161	0.887032	0.924513	PDGFRB|SIK1|EPHB3|PTK6|NTRK1|PRKD2	http://amigo.geneontology.org/amigo/term/GO:0046777
vesicle-mediated transport	Gene Ontology	GO:0016192	6	169	0.911691	0.947545	NCALD|ADAMTS9|TRAPPC6A|GOLT1A|STX19|SPTBN4	http://amigo.geneontology.org/amigo/term/GO:0016192
heart development	Gene Ontology	GO:0007507	5	153	0.930801	0.962011	EDNRA|CITED2|TNNI3|VCAM1|ERBB3	http://amigo.geneontology.org/amigo/term/GO:0007507
intracellular protein transport	Gene Ontology	GO:0006886	7	200	0.931119	0.962011	SYTL5|CD74|APBA1|RPH3A|NGFR|NAPA|STX19	http://amigo.geneontology.org/amigo/term/GO:0006886
mRNA metabolic process	Gene Ontology	GO:0016071	8	224	0.933467	0.962011	TNFSF13|PSMB10|PSME2|PSME1|ZFP36|XRN1|PSMB9|PSMB8	http://amigo.geneontology.org/amigo/term/GO:0016071
negative regulation of transcription, DNA-dependent	Gene Ontology	GO:0045892	19	464	0.936029	0.962011	CD38|TP63|IRF1|PRDM16|PLCB1|MECOM|IFNL1|ID4|ZMYND15|DKK3|GATA6|IFI16|KLF4|LHX9|HEXIM2|PML|CITED2|GATA3|ATF3	http://amigo.geneontology.org/amigo/term/GO:0045892
Fc-epsilon receptor signaling pathway	Gene Ontology	GO:0038095	11	294	0.93861	0.962011	ERBB3|MOV10|FOS|CDKN1A|NR4A1|CASP9|CARD11|PIK3R2|BTC|PDGFRB|EGF	http://amigo.geneontology.org/amigo/term/GO:0038095
protein phosphorylation	Gene Ontology	GO:0006468	13	344	0.947415	0.968352	CCL3|ACVRL1|SIK1|PTK6|CDKN1A|CCL5|RORC|NTRK1|RET|IGFBP3|PDK4|PRKD2|JAK3	http://amigo.geneontology.org/amigo/term/GO:0006468
response to DNA damage stimulus	Gene Ontology	GO:0006974	5	169	0.960726	0.979252	CDKN1A|IRF7|BBC3|TP73|CASP9	http://amigo.geneontology.org/amigo/term/GO:0006974
RNA metabolic process	Gene Ontology	GO:0016070	8	247	0.966971	0.98291	TNFSF13|PSMB10|PSME2|PSME1|ZFP36|XRN1|PSMB9|PSMB8	http://amigo.geneontology.org/amigo/term/GO:0016070
protein transport	Gene Ontology	GO:0015031	14	402	0.979407	0.992824	RAB37|RAB20|MX2|SELENBP1|CADPS2|ADAMTS9|PKDCC|GOLT1A|DNAJC15|RAB43|SLC15A3|SEC16B|RRBP1|HLA-DMA	http://amigo.geneontology.org/amigo/term/GO:0015031
gene expression	Gene Ontology	GO:0010467	20	672	0.999528	1	TNFSF13|THRB|NR4A1|PSMB10|NR4A2|RORC|HNF4G|JUNB|HNF4A|WARS|PSME2|PSME1|SERPINE1|NR4A3|XRN1|PSMB9|PSMB8|NR1H4|ZFP36|A1CF	http://amigo.geneontology.org/amigo/term/GO:0010467
DNA repair	Gene Ontology	GO:0006281	5	280	0.999581	1	GADD45A|ZBTB32|TREX1|FBXO6|PARP3	http://amigo.geneontology.org/amigo/term/GO:0006281
mitotic cell cycle	Gene Ontology	GO:0000278	8	403	0.9999	1	OPTN|PSMB10|BLZF1|PSME2|PSME1|PSMB9|PSMB8|CDKN1A	http://amigo.geneontology.org/amigo/term/GO:0000278
transcription, DNA-dependent	Gene Ontology	GO:0006351	50	1857	1	1	ZCCHC12|MOV10|PHF11|JUNB|ZFHX2|NKX2-8|ZMYND15|MAP2K6|TXNIP|ZNF396|MESP2|SERPINE1|TP63|NANOG|STAT2|STAT1|MECOM|THRB|ZBTB42|CIDEC|IFI16|NFE2|KDM4D|NR1H4|NCOA7|TFEC|NR4A2|NUPR1|SP5|TRIM22|PML|EBF4|HELZ2|HEXIM2|PAX8|CAND2|PRDM16|IRF6|TP73|CREB3L3|STAT5A|LINC00473|PRDM1|BATF2|ABLIM2|SKOR1|HES4|ZNF467|ATF3|HES7	http://amigo.geneontology.org/amigo/term/GO:0006351
regulation of transcription, DNA-dependent	Gene Ontology	GO:0006355	24	1305	1	1	MOV10|PHF11|TLE6|MAP2K6|SKOR1|NANOG|FZD7|MECOM|KDM4D|DLX4|IGF2|ACVRL1|TFEC|NUPR1|SP5|TRIM22|PML|EBF4|POU5F1|CIDEC|PRRX2|HES4|ZNF467|HES7	http://amigo.geneontology.org/amigo/term/GO:0006355
--------------------
