# Supplementary material for: RNA-binding protein CELF6 modulates transcription and splicing levels of genes associated with tumorigenesis in lung cancer A549 cells
Source: PeerJ. 2022 Jul 26;10:e13800. doi: 10.7717/peerj.13800 (PMC9336609; doi:10.7717/peerj.13800)
Supplement: Supplemental Information 10 [file peerj-10-13800-s010.xls]

## Sheet: Down_KEGG_pathway
Term	Database	ID	Input number	Background number	P-Value	Corrected P-Value	Input	Hyperlink	img
Complement and coagulation cascades	KEGG PATHWAY	hsa04610	31	79	2.22045e-16	5.9952e-14	PLAUR|C5AR1|C8G|SERPINE1|SERPINA1|C4BPA|C4BPB|C4A|C4B|C3|C2|FGG|FGA|FGB|ITGAM|ITGB2|VTN|F10|PLAT|ITGAX|F2|CFH|F7|CFD|CFI|CFB|MASP1|SERPING1|C5|C1S|C1R	http://www.genome.jp/kegg-bin/show_pathway?hsa04610/hsa:5327%09red/hsa:5329%09red/hsa:629%09red/hsa:728%09red/hsa:3687%09red/hsa:725%09red/hsa:727%09red/hsa:720%09red/hsa:721%09red/hsa:722%09red/hsa:1675%09red/hsa:715%09red/hsa:2147%09red/hsa:5648%09red/hsa:5054%09red/hsa:5265%09red/hsa:718%09red/hsa:710%09red/hsa:733%09red/hsa:717%09red/hsa:716%09red/hsa:3689%09red/hsa:2243%09red/hsa:7448%09red/…	img/hsa04610.html
Staphylococcus aureus infection	KEGG PATHWAY	hsa05150	21	57	7.332e-11	9.8982e-09	ITGB2|ICAM1|CFH|CFI|CFD|CFB|MASP1|FCGR2A|ITGAM|C1S|C4B|C5AR1|PTAFR|C4A|HLA-DOB|C1R|C3|C2|FGG|C5|HLA-DMA	http://www.genome.jp/kegg-bin/show_pathway?hsa05150/hsa:3689%09red/hsa:629%09red/hsa:727%09red/hsa:5648%09red/hsa:3383%09red/hsa:715%09red/hsa:5724%09red/hsa:3684%09red/hsa:3426%09red/hsa:1675%09red/hsa:718%09red/hsa:2266%09red/hsa:3112%09red/hsa:728%09red/hsa:2212%09red/hsa:3108%09red/hsa:3075%09red/hsa:720%09red/hsa:721%09red/hsa:717%09red/hsa:716%09red	img/hsa05150.html
Cytokine-cytokine receptor interaction	KEGG PATHWAY	hsa04060	49	265	1.62925e-10	1.46633e-08	IL20RA|CCL3|IL20RB|CCL4|TNFSF14|CCR1|TNFRSF14|TNFSF10|IFNGR1|CCR7|EGF|TNFSF13B|IFNL1|IFNL2|IFNL3|CCL28|IL12RB1|FAS|CCL5|IFNB1|INHBA|OSMR|TNFRSF8|INHBE|CX3CL1|CCL20|IL22RA1|CCL22|PDGFRB|CCL26|TNFSF13|CD40|FLT3LG|CXCL11|CXCL10|CXCL16|IL2RG|TNFRSF1B|CCL17|CCL3L3|CCL4L2|IL21R|CSF1|CSF3|IL6|EDAR|CCL19|IL15RA|NGFR	http://www.genome.jp/kegg-bin/show_pathway?hsa04060/hsa:3601%09red/hsa:3569%09red/hsa:1230%09red/hsa:1236%09red/hsa:50615%09red/hsa:6376%09red/hsa:9560%09red/hsa:3627%09red/hsa:3624%09red/hsa:355%09red/hsa:1440%09red/hsa:10673%09red/hsa:414062%09red/hsa:3594%09red/hsa:56477%09red/hsa:10913%09red/hsa:3459%09red/hsa:943%09red/hsa:6364%09red/hsa:3456%09red/hsa:6361%09red/hsa:6363%09red/hsa:1950%09re…	img/hsa04060.html
Herpes simplex infection	KEGG PATHWAY	hsa05168	35	186	4.82824e-08	3.25906e-06	TAP1|CD74|IFIH1|TAP2|TNFSF14|HLA-C|HLA-B|HLA-A|HLA-G|HLA-F|HLA-E|TNFRSF14|IFNGR1|IFIT1|IL6|DDX58|STAT2|STAT1|FAS|CCL5|IFNB1|OAS1|OAS3|OAS2|PML|MYD88|C5|TRAF1|FOS|C3|IRF7|TLR2|TLR3|HLA-DOB|HLA-DMA	http://www.genome.jp/kegg-bin/show_pathway?hsa05168/hsa:3569%09red/hsa:6891%09red/hsa:6890%09red/hsa:4940%09red/hsa:3665%09red/hsa:355%09red/hsa:23586%09red/hsa:727%09red/hsa:3459%09red/hsa:7097%09red/hsa:7098%09red/hsa:3456%09red/hsa:4938%09red/hsa:3434%09red/hsa:4939%09red/hsa:4615%09red/hsa:3106%09red/hsa:8740%09red/hsa:2353%09red/hsa:7185%09red/hsa:3108%09red/hsa:8764%09red/hsa:64135%09red/hs…	img/hsa05168.html
Antigen processing and presentation	KEGG PATHWAY	hsa04612	20	78	2.36177e-07	1.27535e-05	TAP1|CD74|KLRC3|TAP2|CTSL|LGMN|HLA-C|HLA-G|HLA-A|PSME2|HLA-F|HLA-E|PSME1|TAPBP|B2M|KLRC2|HLA-DOB|HLA-B|CTSS|HLA-DMA	http://www.genome.jp/kegg-bin/show_pathway?hsa04612/hsa:6892%09red/hsa:6891%09red/hsa:6890%09red/hsa:3823%09red/hsa:1520%09red/hsa:1514%09red/hsa:3134%09red/hsa:3822%09red/hsa:3107%09red/hsa:3133%09red/hsa:3112%09red/hsa:5720%09red/hsa:3108%09red/hsa:972%09red/hsa:3106%09red/hsa:5721%09red/hsa:5641%09red/hsa:3105%09red/hsa:3135%09red/hsa:567%09red	img/hsa04612.html
Pertussis	KEGG PATHWAY	hsa05133	19	75	5.80918e-07	2.61413e-05	IRF1|ITGB2|C1R|FOS|C4BPA|C4BPB|CASP1|NOS2|IL6|C1S|SERPING1|C4A|C4B|PYCARD|C3|C2|MYD88|C5|ITGAM	http://www.genome.jp/kegg-bin/show_pathway?hsa05133/hsa:3689%09red/hsa:3569%09red/hsa:727%09red/hsa:4843%09red/hsa:29108%09red/hsa:715%09red/hsa:3684%09red/hsa:834%09red/hsa:718%09red/hsa:3659%09red/hsa:722%09red/hsa:4615%09red/hsa:725%09red/hsa:710%09red/hsa:2353%09red/hsa:720%09red/hsa:721%09red/hsa:717%09red/hsa:716%09red	img/hsa05133.html
TNF signaling pathway	KEGG PATHWAY	hsa04668	23	110	1.53636e-06	5.92598e-05	CCL5|JUNB|BIRC3|CASP10|MAP2K6|MLKL|FAS|TRADD|PIK3R2|ICAM1|CX3CL1|CCL20|TRAF1|FOS|VCAM1|CXCL10|TNFRSF1B|CSF1|TNFAIP3|IL6|CREB3L3|CREB3L1|MMP9	http://www.genome.jp/kegg-bin/show_pathway?hsa04668/hsa:3569%09red/hsa:3383%09red/hsa:3726%09red/hsa:6376%09red/hsa:3627%09red/hsa:355%09red/hsa:843%09red/hsa:330%09red/hsa:7412%09red/hsa:90993%09red/hsa:7128%09red/hsa:6364%09red/hsa:2353%09red/hsa:5608%09red/hsa:5296%09red/hsa:4318%09red/hsa:1435%09red/hsa:197259%09red/hsa:7133%09red/hsa:8717%09red/hsa:6352%09red/hsa:7185%09red/hsa:84699%09red	img/hsa04668.html
Cell adhesion molecules (CAMs)	KEGG PATHWAY	hsa04514	27	145	2.11201e-06	7.12805e-05	CLDN14|HLA-C|HLA-B|HLA-A|HLA-G|HLA-F|HLA-E|PECAM1|NTNG2|ICAM2|ICAM1|CDH1|CLDN2|CLDN4|CADM3|ITGB2|CLDN23|CD34|CD40|VCAM1|PDCD1LG2|CDH3|SELL|CD274|ITGAM|HLA-DOB|HLA-DMA	http://www.genome.jp/kegg-bin/show_pathway?hsa04514/hsa:3384%09red/hsa:3383%09red/hsa:23562%09red/hsa:137075%09red/hsa:84628%09red/hsa:7412%09red/hsa:947%09red/hsa:6402%09red/hsa:3106%09red/hsa:3107%09red/hsa:3105%09red/hsa:80380%09red/hsa:3108%09red/hsa:57863%09red/hsa:9075%09red/hsa:1364%09red/hsa:999%09red/hsa:29126%09red/hsa:5175%09red/hsa:1001%09red/hsa:3689%09red/hsa:3684%09red/hsa:958%09re…	img/hsa04514.html
Influenza A	KEGG PATHWAY	hsa05164	28	176	3.09196e-05	0.000927588	IFIH1|TNFSF10|CCL5|MX1|MAP2K6|RSAD2|DDX58|STAT2|STAT1|FAS|IFNB1|OAS1|OAS3|OAS2|PIK3R2|ICAM1|PML|PYCARD|MYD88|CXCL10|IRF7|CASP1|CASP9|IL6|TLR3|HLA-DOB|HLA-DMA|IFNGR1	http://www.genome.jp/kegg-bin/show_pathway?hsa05164/hsa:3569%09red/hsa:3665%09red/hsa:3383%09red/hsa:4940%09red/hsa:3627%09red/hsa:355%09red/hsa:91543%09red/hsa:842%09red/hsa:3459%09red/hsa:23586%09red/hsa:3456%09red/hsa:4938%09red/hsa:4939%09red/hsa:3108%09red/hsa:8743%09red/hsa:5608%09red/hsa:4615%09red/hsa:29108%09red/hsa:64135%09red/hsa:5371%09red/hsa:5296%09red/hsa:834%09red/hsa:6772%09red/h…	img/hsa05164.html
Toll-like receptor signaling pathway	KEGG PATHWAY	hsa04620	20	106	3.6554e-05	0.000986958	TLR2|LBP|IRF7|STAT1|CCL4|CCL3|CCL4L2|FOS|CCL5|CD40|IFNB1|IL6|TLR3|TLR1|PIK3R2|CXCL11|CXCL10|MYD88|CCL3L3|MAP2K6	http://www.genome.jp/kegg-bin/show_pathway?hsa04620/hsa:3569%09red/hsa:3665%09red/hsa:6772%09red/hsa:6352%09red/hsa:7096%09red/hsa:7097%09red/hsa:7098%09red/hsa:6373%09red/hsa:9560%09red/hsa:3456%09red/hsa:3627%09red/hsa:5296%09red/hsa:958%09red/hsa:5608%09red/hsa:6351%09red/hsa:4615%09red/hsa:3929%09red/hsa:2353%09red/hsa:414062%09red/hsa:6348%09red	img/hsa04620.html
Measles	KEGG PATHWAY	hsa05162	23	136	5.98942e-05	0.00147013	IFIH1|TNFSF10|MX1|TNFAIP3|BBC3|IL6|DDX58|STAT2|STAT1|FAS|IFNB1|OAS1|OAS3|OAS2|JAK3|MYD88|PIK3R2|IRF7|IL2RG|TP73|TLR2|STAT5A|IFNGR1	http://www.genome.jp/kegg-bin/show_pathway?hsa05162/hsa:3569%09red/hsa:3665%09red/hsa:3561%09red/hsa:4940%09red/hsa:27113%09red/hsa:355%09red/hsa:23586%09red/hsa:7128%09red/hsa:3459%09red/hsa:7097%09red/hsa:3456%09red/hsa:7161%09red/hsa:4938%09red/hsa:4939%09red/hsa:4615%09red/hsa:8743%09red/hsa:3718%09red/hsa:64135%09red/hsa:5296%09red/hsa:6776%09red/hsa:6772%09red/hsa:6773%09red/hsa:4599%09red	img/hsa05162.html
Rheumatoid arthritis	KEGG PATHWAY	hsa05323	17	91	0.000158114	0.00336667	TNFSF13|TLR2|ITGB2|CTSL|ICAM1|CCL3|FOS|CCL5|CSF1|IL6|HLA-DOB|TNFSF13B|CCL20|TCIRG1|ANGPT1|CCL3L3|HLA-DMA	http://www.genome.jp/kegg-bin/show_pathway?hsa05323/hsa:3689%09red/hsa:3569%09red/hsa:1435%09red/hsa:7097%09red/hsa:6364%09red/hsa:1514%09red/hsa:6352%09red/hsa:10673%09red/hsa:3112%09red/hsa:3383%09red/hsa:3108%09red/hsa:284%09red/hsa:8741%09red/hsa:2353%09red/hsa:10312%09red/hsa:414062%09red/hsa:6348%09red	img/hsa05323.html
Systemic lupus erythematosus	KEGG PATHWAY	hsa05322	22	136	0.000169616	0.00336667	HIST2H2BE|C8G|HIST1H2AC|TRIM21|C4A|C4B|C3|C2|C5|HIST1H3B|CD40|FCGR2A|HIST1H2BD|HIST1H2BN|HIST1H2BJ|HIST1H2BK|ACTN2|HLA-DOB|C1S|C1R|HIST3H2A|HLA-DMA	http://www.genome.jp/kegg-bin/show_pathway?hsa05322/hsa:8358%09red/hsa:720%09red/hsa:727%09red/hsa:8334%09red/hsa:721%09red/hsa:733%09red/hsa:2212%09red/hsa:3108%09red/hsa:88%09red/hsa:3017%09red/hsa:8349%09red/hsa:8341%09red/hsa:92815%09red/hsa:718%09red/hsa:6737%09red/hsa:715%09red/hsa:85236%09red/hsa:717%09red/hsa:716%09red/hsa:8970%09red/hsa:958%09red/hsa:3112%09red	img/hsa05322.html
Phagosome	KEGG PATHWAY	hsa04145	24	155	0.000174568	0.00336667	TAP1|NCF2|TAP2|HLA-C|HLA-B|ITGA2|HLA-G|HLA-F|HLA-E|NOX1|TLR2|C3|HLA-A|NOS1|ITGB2|CTSL|FCGR2A|CTSS|OLR1|TCIRG1|ITGAM|HLA-DOB|C1R|HLA-DMA	http://www.genome.jp/kegg-bin/show_pathway?hsa04145/hsa:4688%09red/hsa:6891%09red/hsa:6890%09red/hsa:27035%09red/hsa:1520%09red/hsa:7097%09red/hsa:2212%09red/hsa:3108%09red/hsa:3106%09red/hsa:3107%09red/hsa:3105%09red/hsa:3673%09red/hsa:4973%09red/hsa:3133%09red/hsa:718%09red/hsa:715%09red/hsa:3689%09red/hsa:1514%09red/hsa:3684%09red/hsa:3112%09red/hsa:4842%09red/hsa:10312%09red/hsa:3135%09red/hs…	img/hsa04145.html
Viral myocarditis	KEGG PATHWAY	hsa05416	13	60	0.000202561	0.00351415	LAMA2|ITGB2|ICAM1|HLA-C|HLA-B|HLA-A|HLA-G|CD40|HLA-E|HLA-F|HLA-DOB|CASP9|HLA-DMA	http://www.genome.jp/kegg-bin/show_pathway?hsa05416/hsa:3689%09red/hsa:3383%09red/hsa:958%09red/hsa:3133%09red/hsa:3112%09red/hsa:3908%09red/hsa:3108%09red/hsa:842%09red/hsa:3106%09red/hsa:3107%09red/hsa:3105%09red/hsa:3135%09red/hsa:3134%09red	img/hsa05416.html
NF-kappa B signaling pathway	KEGG PATHWAY	hsa04064	17	93	0.000208246	0.00351415	TRAF1|DDX58|CCL4|TNFSF14|CCL19|CARD11|BIRC3|CD40|TRADD|TNFAIP3|LBP|ICAM1|BLNK|MYD88|VCAM1|CCL4L2|TNFSF13B	http://www.genome.jp/kegg-bin/show_pathway?hsa04064/hsa:7128%09red/hsa:4615%09red/hsa:7412%09red/hsa:3383%09red/hsa:84433%09red/hsa:9560%09red/hsa:29760%09red/hsa:6363%09red/hsa:958%09red/hsa:10673%09red/hsa:6351%09red/hsa:8717%09red/hsa:23586%09red/hsa:8740%09red/hsa:330%09red/hsa:3929%09red/hsa:7185%09red	img/hsa04064.html
Allograft rejection	KEGG PATHWAY	hsa05330	10	39	0.000257588	0.0040911	HLA-C|FAS|HLA-A|HLA-G|CD40|HLA-E|HLA-F|HLA-DOB|HLA-B|HLA-DMA	http://www.genome.jp/kegg-bin/show_pathway?hsa05330/hsa:958%09red/hsa:3133%09red/hsa:3112%09red/hsa:355%09red/hsa:3108%09red/hsa:3106%09red/hsa:3107%09red/hsa:3105%09red/hsa:3135%09red/hsa:3134%09red	img/hsa05330.html
Cytosolic DNA-sensing pathway	KEGG PATHWAY	hsa04623	13	64	0.000397852	0.00596778	DDX58|TREX1|IRF7|CCL4|CASP1|ZBP1|CCL4L2|CCL5|IFNB1|IL6|CXCL10|PYCARD|TMEM173	http://www.genome.jp/kegg-bin/show_pathway?hsa04623/hsa:834%09red/hsa:3569%09red/hsa:3665%09red/hsa:81030%09red/hsa:9560%09red/hsa:29108%09red/hsa:3627%09red/hsa:340061%09red/hsa:6351%09red/hsa:6352%09red/hsa:23586%09red/hsa:11277%09red/hsa:3456%09red	img/hsa04623.html
Graft-versus-host disease	KEGG PATHWAY	hsa05332	10	42	0.00049286	0.00700379	HLA-C|FAS|HLA-A|HLA-G|HLA-F|HLA-E|IL6|HLA-DOB|HLA-B|HLA-DMA	http://www.genome.jp/kegg-bin/show_pathway?hsa05332/hsa:3569%09red/hsa:3133%09red/hsa:3112%09red/hsa:355%09red/hsa:3108%09red/hsa:3106%09red/hsa:3107%09red/hsa:3105%09red/hsa:3135%09red/hsa:3134%09red	img/hsa05332.html
Type I diabetes mellitus	KEGG PATHWAY	hsa04940	10	44	0.000732206	0.00988478	PTPRN2|HLA-C|FAS|HLA-A|HLA-G|HLA-F|HLA-E|HLA-DOB|HLA-B|HLA-DMA	http://www.genome.jp/kegg-bin/show_pathway?hsa04940/hsa:5799%09red/hsa:3133%09red/hsa:3112%09red/hsa:355%09red/hsa:3108%09red/hsa:3106%09red/hsa:3107%09red/hsa:3105%09red/hsa:3135%09red/hsa:3134%09red	img/hsa04940.html
Hepatitis C	KEGG PATHWAY	hsa05160	20	133	0.000873261	0.0112276	DDX58|IRF7|STAT2|STAT1|CLDN23|CDKN1A|LDLR|IRF1|TRADD|IFNB1|OAS1|TLR3|OAS3|OAS2|PIK3R2|CLDN14|CLDN2|CLDN4|EGF|IFIT1	http://www.genome.jp/kegg-bin/show_pathway?hsa05160/hsa:1026%09red/hsa:3665%09red/hsa:3949%09red/hsa:6772%09red/hsa:6773%09red/hsa:1364%09red/hsa:3456%09red/hsa:4940%09red/hsa:4938%09red/hsa:5296%09red/hsa:7098%09red/hsa:3434%09red/hsa:4939%09red/hsa:8717%09red/hsa:23586%09red/hsa:3659%09red/hsa:23562%09red/hsa:137075%09red/hsa:1950%09red/hsa:9075%09red	img/hsa05160.html
Aldosterone synthesis and secretion	KEGG PATHWAY	hsa04925	14	81	0.00131846	0.016181	PLCB1|CAMK1G|CACNA1I|NR4A2|NR4A1|CACNA1F|KCNK3|CREB3L3|LDLR|CREB3L1|HSD3B1|NPR1|AGTR1|PRKD2	http://www.genome.jp/kegg-bin/show_pathway?hsa04925/hsa:57172%09red/hsa:3949%09red/hsa:25865%09red/hsa:778%09red/hsa:23236%09red/hsa:3164%09red/hsa:4929%09red/hsa:4881%09red/hsa:8911%09red/hsa:3777%09red/hsa:90993%09red/hsa:185%09red/hsa:3283%09red/hsa:84699%09red	img/hsa04925.html
Jak-STAT signaling pathway	KEGG PATHWAY	hsa04630	22	158	0.00140397	0.0164814	IL20RA|IL20RB|CDKN1A|IFNGR1|IFNL1|IFNL2|IFNL3|STAT2|STAT1|IL12RB1|IFNB1|OSMR|JAK3|IL22RA1|PIK3R2|SOCS1|IL2RG|IL21R|CSF3|IL6|STAT5A|IL15RA	http://www.genome.jp/kegg-bin/show_pathway?hsa04630/hsa:3601%09red/hsa:3569%09red/hsa:8651%09red/hsa:3561%09red/hsa:9180%09red/hsa:1440%09red/hsa:50615%09red/hsa:3594%09red/hsa:3459%09red/hsa:3456%09red/hsa:53832%09red/hsa:53833%09red/hsa:3718%09red/hsa:58985%09red/hsa:5296%09red/hsa:282618%09red/hsa:282617%09red/hsa:282616%09red/hsa:6776%09red/hsa:1026%09red/hsa:6772%09red/hsa:6773%09red	img/hsa04630.html
Leishmaniasis	KEGG PATHWAY	hsa05140	13	74	0.00166573	0.0187394	NCF2|NOS2|ITGB2|STAT1|FOS|FCGR2A|TLR2|IFNGR1|HLA-DOB|C3|MYD88|ITGAM|HLA-DMA	http://www.genome.jp/kegg-bin/show_pathway?hsa05140/hsa:3689%09red/hsa:4688%09red/hsa:6772%09red/hsa:3459%09red/hsa:7097%09red/hsa:3684%09red/hsa:718%09red/hsa:3112%09red/hsa:2212%09red/hsa:4615%09red/hsa:4843%09red/hsa:2353%09red/hsa:3108%09red	img/hsa05140.html
Malaria	KEGG PATHWAY	hsa05144	10	49	0.00176808	0.0190953	TLR2|ITGB2|PECAM1|ACKR1|CSF3|IL6|VCAM1|ICAM1|CD40|MYD88	http://www.genome.jp/kegg-bin/show_pathway?hsa05144/hsa:3689%09red/hsa:3569%09red/hsa:7097%09red/hsa:2532%09red/hsa:3383%09red/hsa:958%09red/hsa:1440%09red/hsa:4615%09red/hsa:5175%09red/hsa:7412%09red	img/hsa05144.html
Arginine and proline metabolism	KEGG PATHWAY	hsa00330	10	50	0.00207504	0.0215485	HOGA1|NOS2|CKB|LAP3|PRODH2|ALDH2|AZIN2|P4HA3|NOS1|P4HA1	http://www.genome.jp/kegg-bin/show_pathway?hsa00330/hsa:112817%09red/hsa:58510%09red/hsa:113451%09red/hsa:5033%09red/hsa:283208%09red/hsa:51056%09red/hsa:1152%09red/hsa:4842%09red/hsa:4843%09red/hsa:217%09red	img/hsa00330.html
African trypanosomiasis	KEGG PATHWAY	hsa05143	8	35	0.00237481	0.0237481	PLCB1|IDO1|FAS|IL6|VCAM1|ICAM1|MYD88|APOL1	http://www.genome.jp/kegg-bin/show_pathway?hsa05143/hsa:3569%09red/hsa:3383%09red/hsa:8542%09red/hsa:3620%09red/hsa:23236%09red/hsa:355%09red/hsa:4615%09red/hsa:7412%09red	img/hsa05143.html
Hepatitis B	KEGG PATHWAY	hsa05161	20	146	0.00277086	0.026719	TLR2|DDX58|IRF7|STAT2|STAT1|FOS|FAS|CDKN1A|IFIH1|IFNB1|CASP9|IL6|CREB3L3|STAT5A|CREB3L1|PIK3R2|CASP10|MMP9|MYD88|TLR3	http://www.genome.jp/kegg-bin/show_pathway?hsa05161/hsa:842%09red/hsa:3569%09red/hsa:4318%09red/hsa:2353%09red/hsa:6772%09red/hsa:6773%09red/hsa:7097%09red/hsa:64135%09red/hsa:3456%09red/hsa:4615%09red/hsa:3665%09red/hsa:5296%09red/hsa:7098%09red/hsa:355%09red/hsa:843%09red/hsa:23586%09red/hsa:1026%09red/hsa:90993%09red/hsa:6776%09red/hsa:84699%09red	img/hsa05161.html
Autoimmune thyroid disease	KEGG PATHWAY	hsa05320	10	54	0.00375818	0.0344286	HLA-C|FAS|HLA-A|HLA-G|CD40|HLA-E|HLA-F|HLA-DOB|HLA-B|HLA-DMA	http://www.genome.jp/kegg-bin/show_pathway?hsa05320/hsa:958%09red/hsa:3133%09red/hsa:3112%09red/hsa:355%09red/hsa:3108%09red/hsa:3106%09red/hsa:3107%09red/hsa:3105%09red/hsa:3135%09red/hsa:3134%09red	img/hsa05320.html
Amoebiasis	KEGG PATHWAY	hsa05146	15	100	0.0038254	0.0344286	PLCB1|NOS2|ITGB2|FN1|ACTN2|LAMA2|SERPINB9|IL6|PIK3R2|C8G|SERPINB1|TLR2|SERPINB3|SERPINB4|ITGAM	http://www.genome.jp/kegg-bin/show_pathway?hsa05146/hsa:5272%09red/hsa:3569%09red/hsa:1992%09red/hsa:7097%09red/hsa:88%09red/hsa:3689%09red/hsa:23236%09red/hsa:5296%09red/hsa:3684%09red/hsa:6318%09red/hsa:4843%09red/hsa:2335%09red/hsa:733%09red/hsa:3908%09red/hsa:6317%09red	img/hsa05146.html
Legionellosis	KEGG PATHWAY	hsa05134	10	55	0.00431365	0.0375705	TLR2|ITGB2|BCL2L13|CASP1|CASP9|IL6|ITGAM|C3|PYCARD|MYD88	http://www.genome.jp/kegg-bin/show_pathway?hsa05134/hsa:3689%09red/hsa:3569%09red/hsa:23786%09red/hsa:29108%09red/hsa:7097%09red/hsa:3684%09red/hsa:718%09red/hsa:834%09red/hsa:4615%09red/hsa:842%09red	img/hsa05134.html
Primary bile acid biosynthesis	KEGG PATHWAY	hsa00120	5	17	0.00503133	0.0424519	AKR1C4|ACOX2|HSD3B7|BAAT|CH25H	http://www.genome.jp/kegg-bin/show_pathway?hsa00120/hsa:80270%09red/hsa:8309%09red/hsa:9023%09red/hsa:570%09red/hsa:1109%09red	img/hsa00120.html
Chagas disease (American trypanosomiasis)	KEGG PATHWAY	hsa05142	15	104	0.00556789	0.0446821	PLCB1|NOS2|CCL3|FAS|FOS|CCL5|IFNB1|IL6|IFNGR1|C3|TLR2|MYD88|CCL3L3|SERPINE1|PIK3R2	http://www.genome.jp/kegg-bin/show_pathway?hsa05142/hsa:6352%09red/hsa:3569%09red/hsa:3459%09red/hsa:7097%09red/hsa:3456%09red/hsa:23236%09red/hsa:5296%09red/hsa:718%09red/hsa:355%09red/hsa:4615%09red/hsa:4843%09red/hsa:2353%09red/hsa:414062%09red/hsa:5054%09red/hsa:6348%09red	img/hsa05142.html
Inflammatory bowel disease (IBD)	KEGG PATHWAY	hsa05321	11	66	0.00562663	0.0446821	TLR2|STAT1|IL2RG|IL12RB1|IL21R|RORC|IL6|IFNGR1|HLA-DOB|GATA3|HLA-DMA	http://www.genome.jp/kegg-bin/show_pathway?hsa05321/hsa:3569%09red/hsa:6772%09red/hsa:3459%09red/hsa:2625%09red/hsa:3561%09red/hsa:7097%09red/hsa:6097%09red/hsa:50615%09red/hsa:3112%09red/hsa:3108%09red/hsa:3594%09red	img/hsa05321.html
Intestinal immune network for IgA production	KEGG PATHWAY	hsa04672	9	49	0.00620353	0.0478558	TNFSF13|CD40|IL6|CCL28|PIGR|HLA-DOB|HLA-DMA|IL15RA|TNFSF13B	http://www.genome.jp/kegg-bin/show_pathway?hsa04672/hsa:3601%09red/hsa:3569%09red/hsa:56477%09red/hsa:3108%09red/hsa:958%09red/hsa:3112%09red/hsa:10673%09red/hsa:8741%09red/hsa:5284%09red	img/hsa04672.html
Tuberculosis	KEGG PATHWAY	hsa05152	22	179	0.00665952	0.0499464	CD74|CASP10|IL6|IFNGR1|LBP|STAT1|TCIRG1|TRADD|IFNB1|C3|MYD88|NOS2|ITGB2|FCGR2A|CTSS|ITGAX|CASP9|TLR2|TLR1|ITGAM|HLA-DOB|HLA-DMA	http://www.genome.jp/kegg-bin/show_pathway?hsa05152/hsa:3569%09red/hsa:843%09red/hsa:842%09red/hsa:3459%09red/hsa:1520%09red/hsa:7097%09red/hsa:3456%09red/hsa:2212%09red/hsa:4615%09red/hsa:3108%09red/hsa:718%09red/hsa:3929%09red/hsa:3689%09red/hsa:972%09red/hsa:6772%09red/hsa:7096%09red/hsa:3684%09red/hsa:3687%09red/hsa:3112%09red/hsa:8717%09red/hsa:4843%09red/hsa:10312%09red	img/hsa05152.html
Toxoplasmosis	KEGG PATHWAY	hsa05145	16	119	0.00844637	0.0616357	NOS2|SOCS1|STAT1|BIRC7|BIRC3|LDLR|CD40|CASP9|TLR2|MAP2K6|LAMA2|IFNGR1|HLA-DOB|HLA-DMA|MYD88|PIK3R2	http://www.genome.jp/kegg-bin/show_pathway?hsa05145/hsa:8651%09red/hsa:3949%09red/hsa:6772%09red/hsa:3459%09red/hsa:7097%09red/hsa:79444%09red/hsa:330%09red/hsa:5296%09red/hsa:958%09red/hsa:3112%09red/hsa:4615%09red/hsa:842%09red/hsa:4843%09red/hsa:5608%09red/hsa:3908%09red/hsa:3108%09red	img/hsa05145.html
Chemokine signaling pathway	KEGG PATHWAY	hsa04062	22	187	0.0109718	0.0779577	CCL3|CCL4|CCL5|CCR1|CCR7|STAT2|STAT1|CCL28|JAK3|CX3CL1|CCL20|CCL22|PIK3R2|PLCB1|CXCL11|CXCL10|CXCL16|CCL17|CCL19|CCL4L2|CCL26|CCL3L3	http://www.genome.jp/kegg-bin/show_pathway?hsa04062/hsa:1230%09red/hsa:1236%09red/hsa:9560%09red/hsa:3627%09red/hsa:23236%09red/hsa:414062%09red/hsa:56477%09red/hsa:6364%09red/hsa:6367%09red/hsa:6361%09red/hsa:6363%09red/hsa:6348%09red/hsa:3718%09red/hsa:10344%09red/hsa:58191%09red/hsa:5296%09red/hsa:6772%09red/hsa:6773%09red/hsa:6373%09red/hsa:6376%09red/hsa:6351%09red/hsa:6352%09red	img/hsa04062.html
Peroxisome	KEGG PATHWAY	hsa04146	12	83	0.0122535	0.0848319	NOS2|HMGCL|BAAT|XDH|ACOX2|DDO|PEX11G|FAR2|ABCD1|HAO1|ACSL5|GSTK1	http://www.genome.jp/kegg-bin/show_pathway?hsa04146/hsa:51703%09red/hsa:570%09red/hsa:3155%09red/hsa:7498%09red/hsa:8309%09red/hsa:8528%09red/hsa:55711%09red/hsa:4843%09red/hsa:373156%09red/hsa:54363%09red/hsa:215%09red/hsa:92960%09red	img/hsa04146.html
Salmonella infection	KEGG PATHWAY	hsa05132	12	86	0.0160074	0.10805	CCL3|NOS2|CCL4|FOS|CCL4L2|CASP1|IL6|IFNGR1|LBP|PYCARD|MYD88|CCL3L3	http://www.genome.jp/kegg-bin/show_pathway?hsa05132/hsa:834%09red/hsa:3569%09red/hsa:3459%09red/hsa:29108%09red/hsa:9560%09red/hsa:6351%09red/hsa:4615%09red/hsa:4843%09red/hsa:3929%09red/hsa:2353%09red/hsa:414062%09red/hsa:6348%09red	img/hsa05132.html
Apoptosis	KEGG PATHWAY	hsa04210	17	140	0.0178127	0.117303	TRAF1|TNFSF10|CTSL|CTSO|FAS|FOS|BIRC3|NTRK1|TRADD|PARP3|CASP10|PIK3R2|GADD45A|SEPT4|BBC3|CTSS|CASP9	http://www.genome.jp/kegg-bin/show_pathway?hsa04210/hsa:1647%09red/hsa:4914%09red/hsa:330%09red/hsa:5414%09red/hsa:1520%09red/hsa:1514%09red/hsa:1519%09red/hsa:5296%09red/hsa:27113%09red/hsa:10039%09red/hsa:355%09red/hsa:8717%09red/hsa:843%09red/hsa:842%09red/hsa:8743%09red/hsa:2353%09red/hsa:7185%09red	img/hsa04210.html
RIG-I-like receptor signaling pathway	KEGG PATHWAY	hsa04622	10	70	0.0229433	0.147493	DDX58|IRF7|DHX58|IFIH1|TRADD|IFNB1|CASP10|ISG15|CXCL10|TMEM173	http://www.genome.jp/kegg-bin/show_pathway?hsa04622/hsa:9636%09red/hsa:3665%09red/hsa:64135%09red/hsa:79132%09red/hsa:3456%09red/hsa:3627%09red/hsa:340061%09red/hsa:8717%09red/hsa:843%09red/hsa:23586%09red	img/hsa04622.html
Apoptosis - multiple species	KEGG PATHWAY	hsa04215	6	33	0.0250267	0.153284	BIRC7|BIRC3|CASP9|NGFR|SEPT4|BBC3	http://www.genome.jp/kegg-bin/show_pathway?hsa04215/hsa:5414%09red/hsa:4804%09red/hsa:79444%09red/hsa:27113%09red/hsa:842%09red/hsa:330%09red	img/hsa04215.html
Natural killer cell mediated cytotoxicity	KEGG PATHWAY	hsa04650	16	135	0.0259281	0.153284	KLRC3|ITGB2|TNFSF10|ICAM2|HLA-C|FAS|HLA-A|HLA-G|RAET1L|HLA-E|IFNB1|KLRC2|IFNGR1|ICAM1|HLA-B|PIK3R2	http://www.genome.jp/kegg-bin/show_pathway?hsa04650/hsa:3689%09red/hsa:154064%09red/hsa:3384%09red/hsa:3459%09red/hsa:3823%09red/hsa:3383%09red/hsa:3456%09red/hsa:3822%09red/hsa:5296%09red/hsa:3133%09red/hsa:355%09red/hsa:3106%09red/hsa:3107%09red/hsa:8743%09red/hsa:3105%09red/hsa:3135%09red	img/hsa04650.html
Calcium signaling pathway	KEGG PATHWAY	hsa04020	20	180	0.0261151	0.153284	CD38|PLCB1|NOS2|AGTR1|ERBB3|CACNA1I|RYR1|CACNA1A|CACNA1B|ATP2A3|CACNA1F|P2RX4|NOS1|PTAFR|PLCD1|EDNRA|ORAI3|SLC8A2|PDGFRB|GRIN1	http://www.genome.jp/kegg-bin/show_pathway?hsa04020/hsa:773%09red/hsa:5333%09red/hsa:1909%09red/hsa:774%09red/hsa:5724%09red/hsa:778%09red/hsa:23236%09red/hsa:5159%09red/hsa:6261%09red/hsa:6543%09red/hsa:2065%09red/hsa:5025%09red/hsa:4843%09red/hsa:4842%09red/hsa:8911%09red/hsa:93129%09red/hsa:2902%09red/hsa:489%09red/hsa:185%09red/hsa:952%09red	img/hsa04020.html
Transcriptional misregulation in cancer	KEGG PATHWAY	hsa05202	20	180	0.0261151	0.153284	CCR7|HIST1H3B|SPINT1|LMO2|ETV7|TRAF1|NR4A3|CDKN1A|NUPR1|BIRC3|NTRK1|CD40|IL6|IGFBP3|NGFR|MMP9|PML|PLAT|PAX8|ITGAM	http://www.genome.jp/kegg-bin/show_pathway?hsa05202/hsa:4914%09red/hsa:3569%09red/hsa:8358%09red/hsa:5327%09red/hsa:1236%09red/hsa:4005%09red/hsa:1026%09red/hsa:3684%09red/hsa:5371%09red/hsa:330%09red/hsa:4318%09red/hsa:8013%09red/hsa:3486%09red/hsa:51513%09red/hsa:958%09red/hsa:6692%09red/hsa:7849%09red/hsa:26471%09red/hsa:4804%09red/hsa:7185%09red	img/hsa05202.html
Viral carcinogenesis	KEGG PATHWAY	hsa05203	22	205	0.0288693	0.165845	HLA-C|HLA-B|CDKN1A|HLA-G|HLA-F|HLA-E|HIST2H2BE|TRADD|JAK3|C3|HLA-A|PIK3R2|TRAF1|HIST1H2BD|HIST1H2BN|HIST1H2BJ|HIST1H2BK|ACTN2|IRF7|CREB3L3|STAT5A|CREB3L1	http://www.genome.jp/kegg-bin/show_pathway?hsa05203/hsa:3665%09red/hsa:90993%09red/hsa:3106%09red/hsa:3107%09red/hsa:3105%09red/hsa:88%09red/hsa:7185%09red/hsa:3718%09red/hsa:8349%09red/hsa:8341%09red/hsa:5296%09red/hsa:718%09red/hsa:85236%09red/hsa:6776%09red/hsa:1026%09red/hsa:8970%09red/hsa:3017%09red/hsa:8717%09red/hsa:3133%09red/hsa:84699%09red/hsa:3135%09red/hsa:3134%09red	img/hsa05203.html
B cell receptor signaling pathway	KEGG PATHWAY	hsa04662	10	73	0.0298435	0.16787	RASGRP3|IFITM1|INPP5D|FOS|CARD11|DAPP1|PIK3R2|CD79B|PIK3AP1|BLNK	http://www.genome.jp/kegg-bin/show_pathway?hsa04662/hsa:118788%09red/hsa:974%09red/hsa:84433%09red/hsa:29760%09red/hsa:27071%09red/hsa:8519%09red/hsa:5296%09red/hsa:3635%09red/hsa:25780%09red/hsa:2353%09red	img/hsa04662.html
Leukocyte transendothelial migration	KEGG PATHWAY	hsa04670	14	118	0.0354495	0.191664	NCF2|ITGB2|PECAM1|CLDN14|ACTN2|CLDN23|NOX1|PIK3R2|ICAM1|MMP9|CLDN2|CLDN4|ITGAM|VCAM1	http://www.genome.jp/kegg-bin/show_pathway?hsa04670/hsa:3689%09red/hsa:4688%09red/hsa:4318%09red/hsa:9075%09red/hsa:3383%09red/hsa:1364%09red/hsa:3684%09red/hsa:5296%09red/hsa:27035%09red/hsa:137075%09red/hsa:5175%09red/hsa:23562%09red/hsa:88%09red/hsa:7412%09red	img/hsa04670.html
Retinol metabolism	KEGG PATHWAY	hsa00830	9	65	0.0360051	0.191664	ADH6|ADH4|CYP3A7-CYP3A51P|RDH16|UGT1A8|BCO1|UGT1A6|UGT1A7|UGT1A1	http://www.genome.jp/kegg-bin/show_pathway?hsa00830/hsa:100861540%09red/hsa:54658%09red/hsa:130%09red/hsa:53630%09red/hsa:8608%09red/hsa:54577%09red/hsa:54576%09red/hsa:54578%09red/hsa:127%09red	img/hsa00830.html
Ascorbate and aldarate metabolism	KEGG PATHWAY	hsa00053	5	27	0.0368685	0.191664	UGT1A6|UGT1A7|UGT1A8|UGT1A1|ALDH2	http://www.genome.jp/kegg-bin/show_pathway?hsa00053/hsa:54578%09red/hsa:54658%09red/hsa:54576%09red/hsa:54577%09red/hsa:217%09red	img/hsa00053.html
Pentose and glucuronate interconversions	KEGG PATHWAY	hsa00040	6	36	0.0369131	0.191664	ALDH2|UGT1A8|DHDH|UGT1A6|UGT1A7|UGT1A1	http://www.genome.jp/kegg-bin/show_pathway?hsa00040/hsa:27294%09red/hsa:54658%09red/hsa:54576%09red/hsa:54577%09red/hsa:54578%09red/hsa:217%09red	img/hsa00040.html
HTLV-I infection	KEGG PATHWAY	hsa05166	26	259	0.038789	0.197604	PDGFRB|HLA-C|HLA-B|CDKN1A|HLA-G|HLA-F|HLA-E|XBP1|FZD4|FZD7|STAT5A|JAK3|ICAM1|HLA-A|PIK3R2|ITGB2|FOS|CD40|VCAM1|IL2RG|IL6|ZFP36|HLA-DOB|IL15RA|ATF3|HLA-DMA	http://www.genome.jp/kegg-bin/show_pathway?hsa05166/hsa:3601%09red/hsa:3569%09red/hsa:3383%09red/hsa:3561%09red/hsa:467%09red/hsa:7412%09red/hsa:7538%09red/hsa:7494%09red/hsa:3108%09red/hsa:3106%09red/hsa:3107%09red/hsa:3105%09red/hsa:6776%09red/hsa:3718%09red/hsa:5296%09red/hsa:5159%09red/hsa:8322%09red/hsa:8324%09red/hsa:3689%09red/hsa:1026%09red/hsa:2353%09red/hsa:958%09red/hsa:3112%09red/hsa:…	img/hsa05166.html
Primary immunodeficiency	KEGG PATHWAY	hsa05340	6	37	0.0415575	0.207787	TAP1|TAP2|IL2RG|CD40|JAK3|BLNK	http://www.genome.jp/kegg-bin/show_pathway?hsa05340/hsa:6891%09red/hsa:6890%09red/hsa:3561%09red/hsa:29760%09red/hsa:958%09red/hsa:3718%09red	img/hsa05340.html
Sphingolipid metabolism	KEGG PATHWAY	hsa00600	7	47	0.0433663	0.212889	DEGS2|ARSA|CERS4|SPTLC3|SMPD3|GAL3ST1|SGPP2	http://www.genome.jp/kegg-bin/show_pathway?hsa00600/hsa:123099%09red/hsa:79603%09red/hsa:55512%09red/hsa:55304%09red/hsa:410%09red/hsa:130367%09red/hsa:9514%09red	img/hsa00600.html
Steroid hormone biosynthesis	KEGG PATHWAY	hsa00140	8	58	0.047504	0.22139	CYP3A7-CYP3A51P|UGT1A8|HSD3B1|STS|AKR1C4|UGT1A6|UGT1A7|UGT1A1	http://www.genome.jp/kegg-bin/show_pathway?hsa00140/hsa:412%09red/hsa:100861540%09red/hsa:54658%09red/hsa:1109%09red/hsa:54576%09red/hsa:54577%09red/hsa:54578%09red/hsa:3283%09red	img/hsa00140.html
Lysosome	KEGG PATHWAY	hsa04142	14	123	0.0478132	0.22139	NAPSA|ARSA|LGMN|CTSO|SCARB2|HYAL1|SLC11A1|CTSE|CD68|TCIRG1|LAMP3|CTSL|CTSS|IDUA	http://www.genome.jp/kegg-bin/show_pathway?hsa04142/hsa:1510%09red/hsa:1520%09red/hsa:968%09red/hsa:950%09red/hsa:27074%09red/hsa:1519%09red/hsa:1514%09red/hsa:3425%09red/hsa:3373%09red/hsa:9476%09red/hsa:6556%09red/hsa:5641%09red/hsa:10312%09red/hsa:410%09red	img/hsa04142.html
Type II diabetes mellitus	KEGG PATHWAY	hsa04930	7	48	0.0478443	0.22139	SOCS1|HK2|CACNA1A|CACNA1B|SLC2A4|ABCC8|PIK3R2	http://www.genome.jp/kegg-bin/show_pathway?hsa04930/hsa:773%09red/hsa:8651%09red/hsa:774%09red/hsa:6517%09red/hsa:5296%09red/hsa:6833%09red/hsa:3099%09red	img/hsa04930.html
AGE-RAGE signaling pathway in diabetic complications	KEGG PATHWAY	hsa04933	12	101	0.0487177	0.22139	PLCB1|FN1|STAT1|IL6|STAT5A|PIK3R2|ICAM1|PLCD1|AGTR1|NOX1|SERPINE1|VCAM1	http://www.genome.jp/kegg-bin/show_pathway?hsa04933/hsa:6776%09red/hsa:3569%09red/hsa:6772%09red/hsa:3383%09red/hsa:23236%09red/hsa:5296%09red/hsa:2335%09red/hsa:27035%09red/hsa:7412%09red/hsa:5333%09red/hsa:185%09red/hsa:5054%09red	img/hsa04933.html
Drug metabolism - cytochrome P450	KEGG PATHWAY	hsa00982	9	69	0.0500177	0.22139	ALDH3B1|ADH6|ADH4|FMO5|UGT1A8|UGT1A6|UGT1A7|UGT1A1|GSTK1	http://www.genome.jp/kegg-bin/show_pathway?hsa00982/hsa:221%09red/hsa:2330%09red/hsa:54658%09red/hsa:130%09red/hsa:54576%09red/hsa:54577%09red/hsa:54578%09red/hsa:373156%09red/hsa:127%09red	img/hsa00982.html
p53 signaling pathway	KEGG PATHWAY	hsa04115	9	69	0.0500177	0.22139	FAS|CDKN1A|CD82|TP73|CASP9|IGFBP3|GADD45A|BBC3|SERPINE1	http://www.genome.jp/kegg-bin/show_pathway?hsa04115/hsa:1647%09red/hsa:1026%09red/hsa:3732%09red/hsa:27113%09red/hsa:3486%09red/hsa:7161%09red/hsa:355%09red/hsa:842%09red/hsa:5054%09red	img/hsa04115.html
Nicotinate and nicotinamide metabolism	KEGG PATHWAY	hsa00760	5	30	0.0548756	0.238975	CD38|NNMT|NT5C3A|NMRK1|ENPP1	http://www.genome.jp/kegg-bin/show_pathway?hsa00760/hsa:51251%09red/hsa:4837%09red/hsa:952%09red/hsa:54981%09red/hsa:5167%09red	img/hsa00760.html
Nicotine addiction	KEGG PATHWAY	hsa05033	6	40	0.0576221	0.246952	CHRNB2|CACNA1A|CACNA1B|SLC17A7|GRIN3B|GRIN1	http://www.genome.jp/kegg-bin/show_pathway?hsa05033/hsa:773%09red/hsa:57030%09red/hsa:774%09red/hsa:116444%09red/hsa:1141%09red/hsa:2902%09red	img/hsa05033.html
Chemical carcinogenesis	KEGG PATHWAY	hsa05204	10	82	0.059057	0.249147	ALDH3B1|ADH6|ADH4|SULT1A1|CYP3A7-CYP3A51P|UGT1A8|UGT1A6|UGT1A7|UGT1A1|GSTK1	http://www.genome.jp/kegg-bin/show_pathway?hsa05204/hsa:221%09red/hsa:100861540%09red/hsa:54658%09red/hsa:130%09red/hsa:54576%09red/hsa:54577%09red/hsa:54578%09red/hsa:373156%09red/hsa:6817%09red/hsa:127%09red	img/hsa05204.html
Amyotrophic lateral sclerosis (ALS)	KEGG PATHWAY	hsa05014	7	51	0.0629952	0.261672	NOS1|TNFRSF1B|CASP1|CASP9|MAP2K6|GRIN1|SLC1A2	http://www.genome.jp/kegg-bin/show_pathway?hsa05014/hsa:834%09red/hsa:6506%09red/hsa:7133%09red/hsa:842%09red/hsa:4842%09red/hsa:2902%09red/hsa:5608%09red	img/hsa05014.html
Metabolism of xenobiotics by cytochrome P450	KEGG PATHWAY	hsa00980	9	73	0.0672187	0.274985	ALDH3B1|ADH6|ADH4|DHDH|UGT1A8|UGT1A6|UGT1A7|UGT1A1|GSTK1	http://www.genome.jp/kegg-bin/show_pathway?hsa00980/hsa:221%09red/hsa:27294%09red/hsa:54658%09red/hsa:130%09red/hsa:54576%09red/hsa:54577%09red/hsa:54578%09red/hsa:373156%09red/hsa:127%09red	img/hsa00980.html
Renin secretion	KEGG PATHWAY	hsa04924	8	64	0.0765664	0.306032	PLCB1|NPR1|KCNJ2|PTGER2|CACNA1F|EDNRA|AGTR1|AGT	http://www.genome.jp/kegg-bin/show_pathway?hsa04924/hsa:1909%09red/hsa:778%09red/hsa:23236%09red/hsa:3759%09red/hsa:4881%09red/hsa:5732%09red/hsa:183%09red/hsa:185%09red	img/hsa04924.html
Osteoclast differentiation	KEGG PATHWAY	hsa04380	14	132	0.0770746	0.306032	NCF2|SOCS1|STAT2|STAT1|FOS|MAP2K6|JUNB|CSF1|FCGR2A|NOX1|PIK3R2|BLNK|IFNB1|IFNGR1	http://www.genome.jp/kegg-bin/show_pathway?hsa04380/hsa:4688%09red/hsa:8651%09red/hsa:6772%09red/hsa:6773%09red/hsa:3726%09red/hsa:5608%09red/hsa:29760%09red/hsa:5296%09red/hsa:2212%09red/hsa:27035%09red/hsa:3459%09red/hsa:2353%09red/hsa:3456%09red/hsa:1435%09red	img/hsa04380.html
Fatty acid degradation	KEGG PATHWAY	hsa00071	6	44	0.0840975	0.329077	CPT1C|ACADS|ADH6|ADH4|ALDH2|ACSL5	http://www.genome.jp/kegg-bin/show_pathway?hsa00071/hsa:35%09red/hsa:51703%09red/hsa:126129%09red/hsa:127%09red/hsa:130%09red/hsa:217%09red	img/hsa00071.html
Hematopoietic cell lineage	KEGG PATHWAY	hsa04640	10	88	0.0863917	0.329502	CD38|GP1BA|ITGA1|ITGA2|CD34|CSF1|CSF3|IL6|FLT3LG|ITGAM	http://www.genome.jp/kegg-bin/show_pathway?hsa04640/hsa:3569%09red/hsa:947%09red/hsa:1435%09red/hsa:3672%09red/hsa:3673%09red/hsa:3684%09red/hsa:2323%09red/hsa:2811%09red/hsa:1440%09red/hsa:952%09red	img/hsa04640.html
Cholinergic synapse	KEGG PATHWAY	hsa04725	12	111	0.0866469	0.329502	PLCB1|CHRM4|KCNJ2|CACNA1A|CACNA1B|FOS|CACNA1F|CREB3L3|CREB3L1|PIK3R2|CHRNB2|KCNQ4	http://www.genome.jp/kegg-bin/show_pathway?hsa04725/hsa:773%09red/hsa:2353%09red/hsa:774%09red/hsa:1141%09red/hsa:778%09red/hsa:23236%09red/hsa:5296%09red/hsa:3759%09red/hsa:9132%09red/hsa:1132%09red/hsa:90993%09red/hsa:84699%09red	img/hsa04725.html
Pathways in cancer	KEGG PATHWAY	hsa05200	35	397	0.0901213	0.337955	RASGRP3|TRAF1|BIRC7|CDKN1A|BIRC3|LAMA2|RET|EDNRA|EGF|FZD4|STAT1|FZD7|MECOM|FAS|NTRK1|PTGER2|PIK3R2|PML|FGF11|PDGFRB|ITGA2|CBLC|PLCB1|NOS2|FOS|CDH1|FLT3LG|PAX8|FN1|CASP9|IL6|STAT5A|MMP9|AGTR1|LPAR6	http://www.genome.jp/kegg-bin/show_pathway?hsa05200/hsa:3569%09red/hsa:10161%09red/hsa:79444%09red/hsa:23624%09red/hsa:23236%09red/hsa:355%09red/hsa:842%09red/hsa:330%09red/hsa:2256%09red/hsa:2122%09red/hsa:2335%09red/hsa:1950%09red/hsa:25780%09red/hsa:2353%09red/hsa:5371%09red/hsa:7185%09red/hsa:4914%09red/hsa:3673%09red/hsa:999%09red/hsa:5296%09red/hsa:5159%09red/hsa:4843%09red/hsa:8322%09red/h…	img/hsa05200.html
Cysteine and methionine metabolism	KEGG PATHWAY	hsa00270	6	45	0.0916132	0.338843	SDSL|AHCYL2|SDS|MAT1A|IL4I1|TST	http://www.genome.jp/kegg-bin/show_pathway?hsa00270/hsa:4143%09red/hsa:23382%09red/hsa:259307%09red/hsa:7263%09red/hsa:10993%09red/hsa:113675%09red	img/hsa00270.html
Drug metabolism - other enzymes	KEGG PATHWAY	hsa00983	6	46	0.09948	0.362967	XDH|TYMP|UGT1A8|UGT1A6|UGT1A7|UGT1A1	http://www.genome.jp/kegg-bin/show_pathway?hsa00983/hsa:54658%09red/hsa:54576%09red/hsa:54577%09red/hsa:54578%09red/hsa:7498%09red/hsa:1890%09red	img/hsa00983.html
Maturity onset diabetes of the young	KEGG PATHWAY	hsa04950	4	26	0.104436	0.371725	FOXA3|HNF1A|HNF4A|HNF4G	http://www.genome.jp/kegg-bin/show_pathway?hsa04950/hsa:3174%09red/hsa:6927%09red/hsa:3172%09red/hsa:3171%09red	img/hsa04950.html
HIF-1 signaling pathway	KEGG PATHWAY	hsa04066	11	103	0.104634	0.371725	NOX1|NOS2|HK2|CDKN1A|EGF|IL6|PIK3R2|TF|ANGPT1|SERPINE1|IFNGR1	http://www.genome.jp/kegg-bin/show_pathway?hsa04066/hsa:3569%09red/hsa:3459%09red/hsa:1026%09red/hsa:5296%09red/hsa:7018%09red/hsa:1950%09red/hsa:27035%09red/hsa:3099%09red/hsa:284%09red/hsa:4843%09red/hsa:5054%09red	img/hsa04066.html
Collecting duct acid secretion	KEGG PATHWAY	hsa04966	4	27	0.116187	0.40741	TCIRG1|SLC12A7|CLCNKB|ATP4A	http://www.genome.jp/kegg-bin/show_pathway?hsa04966/hsa:1188%09red/hsa:10723%09red/hsa:10312%09red/hsa:495%09red	img/hsa04966.html
PPAR signaling pathway	KEGG PATHWAY	hsa03320	8	72	0.128837	0.445976	AQP7|CPT1C|PCK1|OLR1|ACOX2|ACSL5|ANGPTL4|PLIN2	http://www.genome.jp/kegg-bin/show_pathway?hsa03320/hsa:126129%09red/hsa:5105%09red/hsa:4973%09red/hsa:364%09red/hsa:51129%09red/hsa:8309%09red/hsa:123%09red/hsa:51703%09red	img/hsa03320.html
Ovarian steroidogenesis	KEGG PATHWAY	hsa04913	6	50	0.13432	0.45907	CYP2J2|BMP6|LDLR|HSD3B1|PLA2G4C|PLA2G4E	http://www.genome.jp/kegg-bin/show_pathway?hsa04913/hsa:654%09red/hsa:123745%09red/hsa:3949%09red/hsa:1573%09red/hsa:8605%09red/hsa:3283%09red	img/hsa04913.html
Thyroid cancer	KEGG PATHWAY	hsa05216	4	29	0.1413	0.47478	CDH1|PAX8|RET|NTRK1	http://www.genome.jp/kegg-bin/show_pathway?hsa05216/hsa:4914%09red/hsa:999%09red/hsa:5979%09red/hsa:7849%09red	img/hsa05216.html
Glycosaminoglycan degradation	KEGG PATHWAY	hsa00531	3	19	0.143694	0.47478	HYAL1|IDUA|HYAL4	http://www.genome.jp/kegg-bin/show_pathway?hsa00531/hsa:3373%09red/hsa:3425%09red/hsa:23553%09red	img/hsa00531.html
Platelet activation	KEGG PATHWAY	hsa04611	12	122	0.145076	0.47478	PLCB1|PTGS1|FCGR2A|ITGA2|GP1BA|PTGIR|PLA2G4C|PIK3R2|PLA2G4E|FGG|FGA|FGB	http://www.genome.jp/kegg-bin/show_pathway?hsa04611/hsa:2811%09red/hsa:123745%09red/hsa:3673%09red/hsa:5742%09red/hsa:2243%09red/hsa:23236%09red/hsa:2244%09red/hsa:5739%09red/hsa:2266%09red/hsa:2212%09red/hsa:5296%09red/hsa:8605%09red	img/hsa04611.html
Small cell lung cancer	KEGG PATHWAY	hsa05222	9	86	0.145951	0.47478	TRAF1|NOS2|FN1|BIRC7|ITGA2|BIRC3|LAMA2|CASP9|PIK3R2	http://www.genome.jp/kegg-bin/show_pathway?hsa05222/hsa:3673%09red/hsa:79444%09red/hsa:5296%09red/hsa:2335%09red/hsa:842%09red/hsa:4843%09red/hsa:330%09red/hsa:3908%09red/hsa:7185%09red	img/hsa05222.html
Sulfur metabolism	KEGG PATHWAY	hsa00920	2	10	0.151642	0.487422	TST|SQRDL	http://www.genome.jp/kegg-bin/show_pathway?hsa00920/hsa:7263%09red/hsa:58472%09red	img/hsa00920.html
Bladder cancer	KEGG PATHWAY	hsa05219	5	41	0.15608	0.495784	CDH1|TYMP|CDKN1A|EGF|MMP9	http://www.genome.jp/kegg-bin/show_pathway?hsa05219/hsa:1026%09red/hsa:4318%09red/hsa:1950%09red/hsa:999%09red/hsa:1890%09red	img/hsa05219.html
Porphyrin and chlorophyll metabolism	KEGG PATHWAY	hsa00860	5	42	0.167694	0.526482	UGT1A8|UGT1A6|UGT1A7|CP|UGT1A1	http://www.genome.jp/kegg-bin/show_pathway?hsa00860/hsa:54576%09red/hsa:54578%09red/hsa:54658%09red/hsa:1356%09red/hsa:54577%09red	img/hsa00860.html
Taurine and hypotaurine metabolism	KEGG PATHWAY	hsa00430	2	11	0.17715	0.549777	BAAT|GGT5	http://www.genome.jp/kegg-bin/show_pathway?hsa00430/hsa:570%09red/hsa:2687%09red	img/hsa00430.html
Glycolysis / Gluconeogenesis	KEGG PATHWAY	hsa00010	7	67	0.186526	0.572294	ALDH3B1|PCK1|ADH6|ADH4|HK2|ALDH2|ALDOC	http://www.genome.jp/kegg-bin/show_pathway?hsa00010/hsa:230%09red/hsa:221%09red/hsa:5105%09red/hsa:127%09red/hsa:3099%09red/hsa:130%09red/hsa:217%09red	img/hsa00010.html
Proteasome	KEGG PATHWAY	hsa03050	5	44	0.191884	0.582121	PSMB8|PSME2|PSME1|PSMB9|PSMB10	http://www.genome.jp/kegg-bin/show_pathway?hsa03050/hsa:5720%09red/hsa:5721%09red/hsa:5696%09red/hsa:5698%09red/hsa:5699%09red	img/hsa03050.html
ABC transporters	KEGG PATHWAY	hsa02010	5	45	0.204418	0.606735	TAP1|ABCD1|ABCC6|TAP2|ABCC8	http://www.genome.jp/kegg-bin/show_pathway?hsa02010/hsa:368%09red/hsa:6891%09red/hsa:6890%09red/hsa:6833%09red/hsa:215%09red	img/hsa02010.html
Starch and sucrose metabolism	KEGG PATHWAY	hsa00500	6	57	0.206739	0.606735	HK2|ENPP1|UGT1A8|UGT1A6|UGT1A7|UGT1A1	http://www.genome.jp/kegg-bin/show_pathway?hsa00500/hsa:54658%09red/hsa:54576%09red/hsa:54577%09red/hsa:54578%09red/hsa:5167%09red/hsa:3099%09red	img/hsa00500.html
NOD-like receptor signaling pathway	KEGG PATHWAY	hsa04621	6	57	0.206739	0.606735	CCL5|CASP1|BIRC3|TNFAIP3|IL6|PYCARD	http://www.genome.jp/kegg-bin/show_pathway?hsa04621/hsa:834%09red/hsa:3569%09red/hsa:7128%09red/hsa:29108%09red/hsa:6352%09red/hsa:330%09red	img/hsa04621.html
Renin-angiotensin system	KEGG PATHWAY	hsa04614	3	23	0.215164	0.62406	ACE2|AGTR1|AGT	http://www.genome.jp/kegg-bin/show_pathway?hsa04614/hsa:59272%09red/hsa:183%09red/hsa:185%09red	img/hsa04614.html
Hypertrophic cardiomyopathy (HCM)	KEGG PATHWAY	hsa05410	8	83	0.223409	0.62406	LAMA2|ITGA1|ITGA2|DES|CACNA1F|IL6|TNNI3|CACNG6	http://www.genome.jp/kegg-bin/show_pathway?hsa05410/hsa:3569%09red/hsa:3672%09red/hsa:3673%09red/hsa:7137%09red/hsa:778%09red/hsa:59285%09red/hsa:3908%09red/hsa:1674%09red	img/hsa05410.html
Thyroid hormone synthesis	KEGG PATHWAY	hsa04918	7	71	0.227037	0.62406	PLCB1|CREB3L3|ATP1B1|ASGR1|CREB3L1|SLC5A5|PAX8	http://www.genome.jp/kegg-bin/show_pathway?hsa04918/hsa:432%09red/hsa:84699%09red/hsa:23236%09red/hsa:481%09red/hsa:7849%09red/hsa:90993%09red/hsa:6528%09red	img/hsa04918.html
Prion diseases	KEGG PATHWAY	hsa05020	4	35	0.227059	0.62406	IL6|C8G|C5|CCL5	http://www.genome.jp/kegg-bin/show_pathway?hsa05020/hsa:3569%09red/hsa:727%09red/hsa:733%09red/hsa:6352%09red	img/hsa05020.html
Tyrosine metabolism	KEGG PATHWAY	hsa00350	4	35	0.227059	0.62406	ALDH3B1|IL4I1|ADH6|ADH4	http://www.genome.jp/kegg-bin/show_pathway?hsa00350/hsa:259307%09red/hsa:221%09red/hsa:127%09red/hsa:130%09red	img/hsa00350.html
Alanine, aspartate and glutamate metabolism	KEGG PATHWAY	hsa00250	4	35	0.227059	0.62406	ADSSL1|DDO|IL4I1|ABAT	http://www.genome.jp/kegg-bin/show_pathway?hsa00250/hsa:259307%09red/hsa:122622%09red/hsa:18%09red/hsa:8528%09red	img/hsa00250.html
cAMP signaling pathway	KEGG PATHWAY	hsa04024	17	199	0.228822	0.62406	NPR1|PTGER2|SSTR2|HCAR2|CNGB1|FOS|GRIN3B|CACNA1F|ATP1B1|HCAR3|CREB3L3|CREB3L1|PIK3R2|FFAR2|EDNRA|GRIN1|TNNI3	http://www.genome.jp/kegg-bin/show_pathway?hsa04024/hsa:6752%09red/hsa:2353%09red/hsa:1909%09red/hsa:116444%09red/hsa:2867%09red/hsa:778%09red/hsa:2902%09red/hsa:5296%09red/hsa:7137%09red/hsa:481%09red/hsa:8843%09red/hsa:4881%09red/hsa:1258%09red/hsa:5732%09red/hsa:90993%09red/hsa:338442%09red/hsa:84699%09red	img/hsa04024.html
Vitamin digestion and absorption	KEGG PATHWAY	hsa04977	3	24	0.234088	0.632037	SLC23A1|SLC52A3|TCN2	http://www.genome.jp/kegg-bin/show_pathway?hsa04977/hsa:113278%09red/hsa:9963%09red/hsa:6948%09red	img/hsa04977.html
Long-term depression	KEGG PATHWAY	hsa04730	6	60	0.241343	0.638331	PLCB1|NOS1|RYR1|CACNA1A|PLA2G4C|PLA2G4E	http://www.genome.jp/kegg-bin/show_pathway?hsa04730/hsa:773%09red/hsa:123745%09red/hsa:23236%09red/hsa:6261%09red/hsa:4842%09red/hsa:8605%09red	img/hsa04730.html
Epstein-Barr virus infection	KEGG PATHWAY	hsa05169	17	201	0.241346	0.638331	CD38|TRAF1|DDX58|HLA-C|HLA-B|CDKN1A|HLA-G|CD40|TRADD|HLA-F|TNFAIP3|PIK3R2|ICAM1|JAK3|HLA-A|HLA-E|MAP2K6	http://www.genome.jp/kegg-bin/show_pathway?hsa05169/hsa:1026%09red/hsa:3718%09red/hsa:7128%09red/hsa:952%09red/hsa:3383%09red/hsa:3133%09red/hsa:3134%09red/hsa:5296%09red/hsa:958%09red/hsa:5608%09red/hsa:8717%09red/hsa:23586%09red/hsa:3106%09red/hsa:3107%09red/hsa:3105%09red/hsa:3135%09red/hsa:7185%09red	img/hsa05169.html
Valine, leucine and isoleucine degradation	KEGG PATHWAY	hsa00280	5	48	0.243511	0.638331	HMGCL|IL4I1|ACADS|ALDH2|ABAT	http://www.genome.jp/kegg-bin/show_pathway?hsa00280/hsa:3155%09red/hsa:259307%09red/hsa:18%09red/hsa:35%09red/hsa:217%09red	img/hsa00280.html
Arrhythmogenic right ventricular cardiomyopathy (ARVC)	KEGG PATHWAY	hsa05412	7	74	0.259222	0.672981	ACTN2|LAMA2|ITGA1|ITGA2|DES|CACNA1F|CACNG6	http://www.genome.jp/kegg-bin/show_pathway?hsa05412/hsa:3672%09red/hsa:3673%09red/hsa:778%09red/hsa:59285%09red/hsa:3908%09red/hsa:88%09red/hsa:1674%09red	img/hsa05412.html
Arachidonic acid metabolism	KEGG PATHWAY	hsa00590	6	62	0.265307	0.680604	CYP2J2|PTGS1|GGT5|PLA2G4C|CYP4F2|PLA2G4E	http://www.genome.jp/kegg-bin/show_pathway?hsa00590/hsa:2687%09red/hsa:123745%09red/hsa:5742%09red/hsa:8529%09red/hsa:1573%09red/hsa:8605%09red	img/hsa00590.html
Proteoglycans in cancer	KEGG PATHWAY	hsa05205	17	205	0.2672	0.680604	CTSL|CBLC|PLAUR|FZD4|FN1|FZD7|NANOG|FAS|CDKN1A|VTN|TLR2|ERBB3|PIK3R2|MMP9|TIMP3|IGF2|ITGA2	http://www.genome.jp/kegg-bin/show_pathway?hsa05205/hsa:1026%09red/hsa:4318%09red/hsa:7448%09red/hsa:1514%09red/hsa:7097%09red/hsa:3481%09red/hsa:3673%09red/hsa:23624%09red/hsa:7078%09red/hsa:5296%09red/hsa:2335%09red/hsa:79923%09red/hsa:2065%09red/hsa:355%09red/hsa:5329%09red/hsa:8322%09red/hsa:8324%09red	img/hsa05205.html
PI3K-Akt signaling pathway	KEGG PATHWAY	hsa04151	27	341	0.277277	0.693776	PDGFRB|PCK1|ITGA1|CDKN1A|NGFR|CSF3|EGF|PIK3AP1|IL6|IFNB1|OSMR|JAK3|FGF11|ANGPT1|ITGA2|PIK3R2|LAMA2|NR4A1|VTN|FN1|IL2RG|CSF1|CASP9|TLR2|CREB3L3|CREB3L1|LPAR6	http://www.genome.jp/kegg-bin/show_pathway?hsa04151/hsa:3569%09red/hsa:2256%09red/hsa:10161%09red/hsa:3561%09red/hsa:4804%09red/hsa:5105%09red/hsa:9180%09red/hsa:1440%09red/hsa:842%09red/hsa:90993%09red/hsa:7097%09red/hsa:3456%09red/hsa:3673%09red/hsa:2335%09red/hsa:3164%09red/hsa:1950%09red/hsa:284%09red/hsa:3718%09red/hsa:3672%09red/hsa:1026%09red/hsa:5296%09red/hsa:5159%09red/hsa:3908%09red/hs…	img/hsa04151.html
Synaptic vesicle cycle	KEGG PATHWAY	hsa04721	6	63	0.277511	0.693776	CACNA1A|CACNA1B|SLC17A7|TCIRG1|NAPA|SYT1	http://www.genome.jp/kegg-bin/show_pathway?hsa04721/hsa:773%09red/hsa:8775%09red/hsa:57030%09red/hsa:774%09red/hsa:6857%09red/hsa:10312%09red	img/hsa04721.html
Glycosaminoglycan biosynthesis - keratan sulfate	KEGG PATHWAY	hsa00533	2	15	0.283153	0.701388	ST3GAL3|B3GNT7	http://www.genome.jp/kegg-bin/show_pathway?hsa00533/hsa:6487%09red/hsa:93010%09red	img/hsa00533.html
Mineral absorption	KEGG PATHWAY	hsa04978	5	52	0.298278	0.72509	TF|SLC26A9|ATP1B1|MT2A|SLC11A1	http://www.genome.jp/kegg-bin/show_pathway?hsa04978/hsa:6556%09red/hsa:4502%09red/hsa:7018%09red/hsa:481%09red/hsa:115019%09red	img/hsa04978.html
Caffeine metabolism	KEGG PATHWAY	hsa00232	1	5	0.304391	0.72509	XDH	http://www.genome.jp/kegg-bin/show_pathway?hsa00232/hsa:7498%09red	img/hsa00232.html
Butirosin and neomycin biosynthesis	KEGG PATHWAY	hsa00524	1	5	0.304391	0.72509	HK2	http://www.genome.jp/kegg-bin/show_pathway?hsa00524/hsa:3099%09red	img/hsa00524.html
Phenylalanine, tyrosine and tryptophan biosynthesis	KEGG PATHWAY	hsa00400	1	5	0.304391	0.72509	IL4I1	http://www.genome.jp/kegg-bin/show_pathway?hsa00400/hsa:259307%09red	img/hsa00400.html
Tryptophan metabolism	KEGG PATHWAY	hsa00380	4	40	0.306149	0.72509	IL4I1|IDO1|ALDH2|TDO2	http://www.genome.jp/kegg-bin/show_pathway?hsa00380/hsa:259307%09red/hsa:217%09red/hsa:3620%09red/hsa:6999%09red	img/hsa00380.html
Butanoate metabolism	KEGG PATHWAY	hsa00650	3	28	0.311926	0.727917	HMGCL|ACADS|ABAT	http://www.genome.jp/kegg-bin/show_pathway?hsa00650/hsa:3155%09red/hsa:18%09red/hsa:35%09red	img/hsa00650.html
Oxytocin signaling pathway	KEGG PATHWAY	hsa04921	13	158	0.312735	0.727917	CD38|PLCB1|CAMK1G|KCNJ2|RYR1|CDKN1A|FOS|CACNA1F|PLA2G4C|PIK3R2|PLA2G4E|NPR1|CACNG6	http://www.genome.jp/kegg-bin/show_pathway?hsa04921/hsa:1026%09red/hsa:952%09red/hsa:123745%09red/hsa:57172%09red/hsa:778%09red/hsa:59285%09red/hsa:23236%09red/hsa:3759%09red/hsa:6261%09red/hsa:5296%09red/hsa:4881%09red/hsa:8605%09red/hsa:2353%09red	img/hsa04921.html
Central carbon metabolism in cancer	KEGG PATHWAY	hsa05230	6	67	0.327442	0.744103	PDGFRB|HK2|SLC16A3|NTRK1|RET|PIK3R2	http://www.genome.jp/kegg-bin/show_pathway?hsa05230/hsa:4914%09red/hsa:5296%09red/hsa:5159%09red/hsa:9123%09red/hsa:3099%09red/hsa:5979%09red	img/hsa05230.html
MAPK signaling pathway	KEGG PATHWAY	hsa04010	20	255	0.330041	0.744103	CACNA1I|RASGRP3|FOS|MECOM|FAS|CACNA1B|NR4A1|NTRK1|CACNA1F|EGF|CACNA1A|CACNG6|GADD45A|PLA2G4C|FGF11|DUSP16|PDGFRB|DUSP10|PLA2G4E|MAP2K6	http://www.genome.jp/kegg-bin/show_pathway?hsa04010/hsa:1647%09red/hsa:773%09red/hsa:2256%09red/hsa:4914%09red/hsa:123745%09red/hsa:774%09red/hsa:11221%09red/hsa:778%09red/hsa:25780%09red/hsa:2122%09red/hsa:59285%09red/hsa:3164%09red/hsa:1950%09red/hsa:355%09red/hsa:80824%09red/hsa:8605%09red/hsa:8911%09red/hsa:2353%09red/hsa:5159%09red/hsa:5608%09red	img/hsa04010.html
Linoleic acid metabolism	KEGG PATHWAY	hsa00591	3	29	0.331614	0.744103	PLA2G4C|CYP2J2|PLA2G4E	http://www.genome.jp/kegg-bin/show_pathway?hsa00591/hsa:8605%09red/hsa:1573%09red/hsa:123745%09red	img/hsa00591.html
Pentose phosphate pathway	KEGG PATHWAY	hsa00030	3	29	0.331614	0.744103	ALDOC|RBKS|H6PD	http://www.genome.jp/kegg-bin/show_pathway?hsa00030/hsa:9563%09red/hsa:230%09red/hsa:64080%09red	img/hsa00030.html
Phenylalanine metabolism	KEGG PATHWAY	hsa00360	2	17	0.336224	0.744103	ALDH3B1|IL4I1	http://www.genome.jp/kegg-bin/show_pathway?hsa00360/hsa:259307%09red/hsa:221%09red	img/hsa00360.html
Nitrogen metabolism	KEGG PATHWAY	hsa00910	2	17	0.336224	0.744103	CA9|CA12	http://www.genome.jp/kegg-bin/show_pathway?hsa00910/hsa:768%09red/hsa:771%09red	img/hsa00910.html
ECM-receptor interaction	KEGG PATHWAY	hsa04512	7	82	0.350106	0.768524	LAMA2|FN1|ITGA1|ITGA2|GP1BA|VTN|CD47	http://www.genome.jp/kegg-bin/show_pathway?hsa04512/hsa:3672%09red/hsa:2811%09red/hsa:3673%09red/hsa:7448%09red/hsa:961%09red/hsa:2335%09red/hsa:3908%09red	img/hsa04512.html
Other glycan degradation	KEGG PATHWAY	hsa00511	2	18	0.362344	0.788494	MAN2B2|HEXDC	http://www.genome.jp/kegg-bin/show_pathway?hsa00511/hsa:23324%09red/hsa:284004%09red	img/hsa00511.html
Adipocytokine signaling pathway	KEGG PATHWAY	hsa04920	6	70	0.365635	0.788494	CPT1C|PCK1|TNFRSF1B|SLC2A4|TRADD|ACSL5	http://www.genome.jp/kegg-bin/show_pathway?hsa04920/hsa:51703%09red/hsa:7133%09red/hsa:5105%09red/hsa:6517%09red/hsa:8717%09red/hsa:126129%09red	img/hsa04920.html
Other types of O-glycan biosynthesis	KEGG PATHWAY	hsa00514	3	31	0.370884	0.788494	COLGALT2|B3GALT4|ST3GAL3	http://www.genome.jp/kegg-bin/show_pathway?hsa00514/hsa:8705%09red/hsa:6487%09red/hsa:23127%09red	img/hsa00514.html
beta-Alanine metabolism	KEGG PATHWAY	hsa00410	3	31	0.370884	0.788494	ALDH3B1|ALDH2|ABAT	http://www.genome.jp/kegg-bin/show_pathway?hsa00410/hsa:18%09red/hsa:221%09red/hsa:217%09red	img/hsa00410.html
Melanoma	KEGG PATHWAY	hsa05218	6	71	0.378428	0.794075	PDGFRB|CDKN1A|PIK3R2|CDH1|FGF11|EGF	http://www.genome.jp/kegg-bin/show_pathway?hsa05218/hsa:1026%09red/hsa:999%09red/hsa:2256%09red/hsa:5159%09red/hsa:1950%09red/hsa:5296%09red	img/hsa05218.html
Inflammatory mediator regulation of TRP channels	KEGG PATHWAY	hsa04750	8	98	0.379391	0.794075	CYP2J2|PLCB1|NTRK1|PTGER2|MAP2K6|PLA2G4C|PLA2G4E|PIK3R2	http://www.genome.jp/kegg-bin/show_pathway?hsa04750/hsa:4914%09red/hsa:123745%09red/hsa:23236%09red/hsa:5296%09red/hsa:1573%09red/hsa:5732%09red/hsa:8605%09red/hsa:5608%09red	img/hsa04750.html
Insulin secretion	KEGG PATHWAY	hsa04911	7	85	0.385196	0.794226	PLCB1|CACNA1F|ATP1B1|CREB3L3|CREB3L1|ABCC8|KCNN1	http://www.genome.jp/kegg-bin/show_pathway?hsa04911/hsa:778%09red/hsa:23236%09red/hsa:3780%09red/hsa:6833%09red/hsa:481%09red/hsa:90993%09red/hsa:84699%09red	img/hsa04911.html
Neuroactive ligand-receptor interaction	KEGG PATHWAY	hsa04080	21	278	0.390151	0.794226	AGTR1|F2|CHRNB2|NPY4R|SSTR2|GLRA3|GPR35|CHRM4|THRB|GRIK5|PTGER2|S1PR4|P2RX4|PTAFR|C5AR1|GRIN3B|EDNRA|GRIN1|PTGIR|LPAR6|OPRL1	http://www.genome.jp/kegg-bin/show_pathway?hsa04080/hsa:2859%09red/hsa:10161%09red/hsa:1909%09red/hsa:7068%09red/hsa:4987%09red/hsa:5724%09red/hsa:8001%09red/hsa:2902%09red/hsa:6752%09red/hsa:2147%09red/hsa:5540%09red/hsa:116444%09red/hsa:5739%09red/hsa:728%09red/hsa:5025%09red/hsa:1141%09red/hsa:5732%09red/hsa:1132%09red/hsa:2901%09red/hsa:185%09red/hsa:8698%09red	img/hsa04080.html
Asthma	KEGG PATHWAY	hsa05310	3	32	0.390373	0.794226	CD40|HLA-DOB|HLA-DMA	http://www.genome.jp/kegg-bin/show_pathway?hsa05310/hsa:3112%09red/hsa:3108%09red/hsa:958%09red	img/hsa05310.html
Prolactin signaling pathway	KEGG PATHWAY	hsa04917	6	72	0.39123	0.794226	IRF1|SOCS1|STAT1|FOS|STAT5A|PIK3R2	http://www.genome.jp/kegg-bin/show_pathway?hsa04917/hsa:6776%09red/hsa:8651%09red/hsa:6772%09red/hsa:5296%09red/hsa:3659%09red/hsa:2353%09red	img/hsa04917.html
Glutamatergic synapse	KEGG PATHWAY	hsa04724	9	114	0.404411	0.807453	PLCB1|CACNA1A|SLC17A7|GRIK5|GRIN3B|SLC1A2|PLA2G4C|GRIN1|PLA2G4E	http://www.genome.jp/kegg-bin/show_pathway?hsa04724/hsa:773%09red/hsa:123745%09red/hsa:57030%09red/hsa:116444%09red/hsa:6506%09red/hsa:23236%09red/hsa:8605%09red/hsa:2901%09red/hsa:2902%09red	img/hsa04724.html
Rap1 signaling pathway	KEGG PATHWAY	hsa04015	16	211	0.406988	0.807453	PLCB1|ITGB2|RASGRP3|MAP2K6|SKAP1|CSF1|EGF|ITGAM|PIK3R2|CDH1|FGF11|ANGPT1|PDGFRB|GRIN1|PRKD2|NGFR	http://www.genome.jp/kegg-bin/show_pathway?hsa04015/hsa:3689%09red/hsa:1435%09red/hsa:25865%09red/hsa:999%09red/hsa:2256%09red/hsa:23236%09red/hsa:5296%09red/hsa:3684%09red/hsa:1950%09red/hsa:8631%09red/hsa:25780%09red/hsa:284%09red/hsa:2902%09red/hsa:5159%09red/hsa:4804%09red/hsa:5608%09red	img/hsa04015.html
Signaling pathways regulating pluripotency of stem cells	KEGG PATHWAY	hsa04550	11	142	0.408972	0.807453	JAK3|FZD4|FZD7|ID4|KLF4|INHBA|HNF1A|POU5F1|PIK3R2|NANOG|INHBE	http://www.genome.jp/kegg-bin/show_pathway?hsa04550/hsa:3400%09red/hsa:9314%09red/hsa:79923%09red/hsa:83729%09red/hsa:5296%09red/hsa:3624%09red/hsa:3718%09red/hsa:5460%09red/hsa:8322%09red/hsa:6927%09red/hsa:8324%09red	img/hsa04550.html
Fructose and mannose metabolism	KEGG PATHWAY	hsa00051	3	33	0.409708	0.807453	HK2|ALDOC|PFKFB4	http://www.genome.jp/kegg-bin/show_pathway?hsa00051/hsa:5210%09red/hsa:230%09red/hsa:3099%09red	img/hsa00051.html
Gastric acid secretion	KEGG PATHWAY	hsa04971	6	74	0.416802	0.815483	PLCB1|ATP4A|KCNJ2|ATP1B1|SSTR2|KCNJ16	http://www.genome.jp/kegg-bin/show_pathway?hsa04971/hsa:6752%09red/hsa:23236%09red/hsa:3759%09red/hsa:481%09red/hsa:495%09red/hsa:3773%09red	img/hsa04971.html
ErbB signaling pathway	KEGG PATHWAY	hsa04012	7	88	0.420371	0.816548	CBLC|ERBB3|CDKN1A|STAT5A|PIK3R2|BTC|EGF	http://www.genome.jp/kegg-bin/show_pathway?hsa04012/hsa:6776%09red/hsa:1026%09red/hsa:685%09red/hsa:2065%09red/hsa:23624%09red/hsa:5296%09red/hsa:1950%09red	img/hsa04012.html
Platinum drug resistance	KEGG PATHWAY	hsa01524	6	75	0.429547	0.821536	FAS|CDKN1A|BIRC3|CASP9|PIK3R2|BBC3	http://www.genome.jp/kegg-bin/show_pathway?hsa01524/hsa:1026%09red/hsa:5296%09red/hsa:27113%09red/hsa:355%09red/hsa:842%09red/hsa:330%09red	img/hsa01524.html
Prostate cancer	KEGG PATHWAY	hsa05215	7	89	0.432067	0.821536	PDGFRB|CDKN1A|CASP9|CREB3L3|CREB3L1|PIK3R2|EGF	http://www.genome.jp/kegg-bin/show_pathway?hsa05215/hsa:1026%09red/hsa:5159%09red/hsa:1950%09red/hsa:5296%09red/hsa:842%09red/hsa:90993%09red/hsa:84699%09red	img/hsa05215.html
Salivary secretion	KEGG PATHWAY	hsa04970	7	89	0.432067	0.821536	CD38|PLCB1|NOS1|ATP1B1|CST2|CST3|CST1	http://www.genome.jp/kegg-bin/show_pathway?hsa04970/hsa:952%09red/hsa:23236%09red/hsa:481%09red/hsa:1469%09red/hsa:4842%09red/hsa:1470%09red/hsa:1471%09red	img/hsa04970.html
Arginine biosynthesis	KEGG PATHWAY	hsa00220	2	21	0.438047	0.826259	NOS1|NOS2	http://www.genome.jp/kegg-bin/show_pathway?hsa00220/hsa:4842%09red/hsa:4843%09red	img/hsa00220.html
Protein digestion and absorption	KEGG PATHWAY	hsa04974	7	90	0.443732	0.826259	SLC7A7|COL22A1|ATP1B1|COL5A3|ACE2|SLC8A2|DPP4	http://www.genome.jp/kegg-bin/show_pathway?hsa04974/hsa:59272%09red/hsa:9056%09red/hsa:1803%09red/hsa:50509%09red/hsa:169044%09red/hsa:6543%09red/hsa:481%09red	img/hsa04974.html
Dilated cardiomyopathy	KEGG PATHWAY	hsa05414	7	90	0.443732	0.826259	LAMA2|ITGA1|ITGA2|DES|CACNA1F|TNNI3|CACNG6	http://www.genome.jp/kegg-bin/show_pathway?hsa05414/hsa:3672%09red/hsa:3673%09red/hsa:7137%09red/hsa:778%09red/hsa:59285%09red/hsa:1674%09red/hsa:3908%09red	img/hsa05414.html
Cocaine addiction	KEGG PATHWAY	hsa05030	4	49	0.451861	0.835633	CREB3L3|GRIN1|CREB3L1|GRIN3B	http://www.genome.jp/kegg-bin/show_pathway?hsa05030/hsa:116444%09red/hsa:2902%09red/hsa:90993%09red/hsa:84699%09red	img/hsa05030.html
Vascular smooth muscle contraction	KEGG PATHWAY	hsa04270	9	120	0.46552	0.855037	ACTA2|PLCB1|NPR1|CACNA1F|PTGIR|PLA2G4C|EDNRA|AGTR1|PLA2G4E	http://www.genome.jp/kegg-bin/show_pathway?hsa04270/hsa:1909%09red/hsa:123745%09red/hsa:778%09red/hsa:23236%09red/hsa:59%09red/hsa:5739%09red/hsa:4881%09red/hsa:8605%09red/hsa:185%09red	img/hsa04270.html
Proximal tubule bicarbonate reclamation	KEGG PATHWAY	hsa04964	2	23	0.48572	0.886111	PCK1|ATP1B1	http://www.genome.jp/kegg-bin/show_pathway?hsa04964/hsa:481%09red/hsa:5105%09red	img/hsa04964.html
Pancreatic cancer	KEGG PATHWAY	hsa05212	5	66	0.495236	0.889417	ARHGEF6|EGF|PIK3R2|STAT1|CASP9	http://www.genome.jp/kegg-bin/show_pathway?hsa05212/hsa:9459%09red/hsa:6772%09red/hsa:1950%09red/hsa:5296%09red/hsa:842%09red	img/hsa05212.html
Endometrial cancer	KEGG PATHWAY	hsa05213	4	52	0.498631	0.889417	CDH1|EGF|PIK3R2|CASP9	http://www.genome.jp/kegg-bin/show_pathway?hsa05213/hsa:999%09red/hsa:1950%09red/hsa:5296%09red/hsa:842%09red	img/hsa05213.html
cGMP-PKG signaling pathway	KEGG PATHWAY	hsa04022	12	167	0.506391	0.889417	PLCB1|NPR1|CNGB1|ATP2A3|CACNA1F|ATP1B1|CREB3L3|CREB3L1|PIK3R2|EDNRA|AGTR1|SLC8A2	http://www.genome.jp/kegg-bin/show_pathway?hsa04022/hsa:1909%09red/hsa:778%09red/hsa:23236%09red/hsa:5296%09red/hsa:6543%09red/hsa:481%09red/hsa:4881%09red/hsa:1258%09red/hsa:90993%09red/hsa:489%09red/hsa:185%09red/hsa:84699%09red	img/hsa04022.html
Glycosaminoglycan biosynthesis - heparan sulfate / heparin	KEGG PATHWAY	hsa00534	2	24	0.508596	0.889417	HS3ST3B1|EXT1	http://www.genome.jp/kegg-bin/show_pathway?hsa00534/hsa:9953%09red/hsa:2131%09red	img/hsa00534.html
Histidine metabolism	KEGG PATHWAY	hsa00340	2	24	0.508596	0.889417	ALDH3B1|ALDH2	http://www.genome.jp/kegg-bin/show_pathway?hsa00340/hsa:221%09red/hsa:217%09red	img/hsa00340.html
Amphetamine addiction	KEGG PATHWAY	hsa05031	5	67	0.508768	0.889417	CREB3L3|GRIN1|CREB3L1|GRIN3B|FOS	http://www.genome.jp/kegg-bin/show_pathway?hsa05031/hsa:116444%09red/hsa:2902%09red/hsa:90993%09red/hsa:2353%09red/hsa:84699%09red	img/hsa05031.html
Sulfur relay system	KEGG PATHWAY	hsa04122	1	10	0.516258	0.889417	TST	http://www.genome.jp/kegg-bin/show_pathway?hsa04122/hsa:7263%09red	img/hsa04122.html
Synthesis and degradation of ketone bodies	KEGG PATHWAY	hsa00072	1	10	0.516258	0.889417	HMGCL	http://www.genome.jp/kegg-bin/show_pathway?hsa00072/hsa:3155%09red	img/hsa00072.html
Aldosterone-regulated sodium reabsorption	KEGG PATHWAY	hsa04960	3	39	0.520616	0.889417	ATP1B1|SCNN1B|PIK3R2	http://www.genome.jp/kegg-bin/show_pathway?hsa04960/hsa:481%09red/hsa:5296%09red/hsa:6338%09red	img/hsa04960.html
Fc epsilon RI signaling pathway	KEGG PATHWAY	hsa04664	5	68	0.522152	0.889417	PLA2G4C|INPP5D|PIK3R2|PLA2G4E|MAP2K6	http://www.genome.jp/kegg-bin/show_pathway?hsa04664/hsa:8605%09red/hsa:5296%09red/hsa:3635%09red/hsa:123745%09red/hsa:5608%09red	img/hsa04664.html
Endocrine resistance	KEGG PATHWAY	hsa01522	7	97	0.523768	0.889417	FOS|CDKN1A|GPER1|DLL1|DLL4|PIK3R2|MMP9	http://www.genome.jp/kegg-bin/show_pathway?hsa01522/hsa:1026%09red/hsa:4318%09red/hsa:2353%09red/hsa:2852%09red/hsa:5296%09red/hsa:54567%09red/hsa:28514%09red	img/hsa01522.html
Serotonergic synapse	KEGG PATHWAY	hsa04726	8	112	0.529773	0.890155	CYP2J2|PLCB1|PTGS1|CACNA1A|CACNA1B|CACNA1F|PLA2G4C|PLA2G4E	http://www.genome.jp/kegg-bin/show_pathway?hsa04726/hsa:773%09red/hsa:123745%09red/hsa:774%09red/hsa:5742%09red/hsa:778%09red/hsa:23236%09red/hsa:1573%09red/hsa:8605%09red	img/hsa04726.html
alpha-Linolenic acid metabolism	KEGG PATHWAY	hsa00592	2	25	0.530796	0.890155	PLA2G4C|PLA2G4E	http://www.genome.jp/kegg-bin/show_pathway?hsa00592/hsa:8605%09red/hsa:123745%09red	img/hsa00592.html
Pyruvate metabolism	KEGG PATHWAY	hsa00620	3	40	0.538005	0.891174	LDHD|PCK1|ALDH2	http://www.genome.jp/kegg-bin/show_pathway?hsa00620/hsa:197257%09red/hsa:5105%09red/hsa:217%09red	img/hsa00620.html
Glycine, serine and threonine metabolism	KEGG PATHWAY	hsa00260	3	40	0.538005	0.891174	SRR|SDSL|SDS	http://www.genome.jp/kegg-bin/show_pathway?hsa00260/hsa:10993%09red/hsa:63826%09red/hsa:113675%09red	img/hsa00260.html
Regulation of actin cytoskeleton	KEGG PATHWAY	hsa04810	15	215	0.545014	0.893251	ITGAX|PDGFRB|F2|ITGB2|FN1|ACTN2|ARHGEF6|ITGA1|ARHGEF4|CHRM4|EGF|PIK3R2|FGF11|ITGA2|ITGAM	http://www.genome.jp/kegg-bin/show_pathway?hsa04810/hsa:3689%09red/hsa:9459%09red/hsa:3687%09red/hsa:3672%09red/hsa:3673%09red/hsa:88%09red/hsa:2256%09red/hsa:3684%09red/hsa:2147%09red/hsa:2335%09red/hsa:50649%09red/hsa:1950%09red/hsa:5296%09red/hsa:5159%09red/hsa:1132%09red	img/hsa04810.html
Estrogen signaling pathway	KEGG PATHWAY	hsa04915	7	99	0.545876	0.893251	PLCB1|FOS|GPER1|CREB3L3|CREB3L1|PIK3R2|MMP9	http://www.genome.jp/kegg-bin/show_pathway?hsa04915/hsa:4318%09red/hsa:2353%09red/hsa:2852%09red/hsa:23236%09red/hsa:5296%09red/hsa:90993%09red/hsa:84699%09red	img/hsa04915.html
Glycosphingolipid biosynthesis - lacto and neolacto series	KEGG PATHWAY	hsa00601	2	26	0.552303	0.898325	ST3GAL3|B3GNT3	http://www.genome.jp/kegg-bin/show_pathway?hsa00601/hsa:6487%09red/hsa:10331%09red	img/hsa00601.html
Regulation of lipolysis in adipocytes	KEGG PATHWAY	hsa04923	4	56	0.558132	0.902112	AQP7|PTGS1|PIK3R2|NPR1	http://www.genome.jp/kegg-bin/show_pathway?hsa04923/hsa:364%09red/hsa:5742%09red/hsa:5296%09red/hsa:4881%09red	img/hsa04923.html
Bile secretion	KEGG PATHWAY	hsa04976	5	71	0.561314	0.902112	NR1H4|SLC51B|BAAT|LDLR|ATP1B1	http://www.genome.jp/kegg-bin/show_pathway?hsa04976/hsa:9971%09red/hsa:481%09red/hsa:3949%09red/hsa:123264%09red/hsa:570%09red	img/hsa04976.html
Choline metabolism in cancer	KEGG PATHWAY	hsa05231	7	101	0.567545	0.906728	PDGFRB|SLC44A3|FOS|PIK3R2|PLA2G4C|EGF|PLA2G4E	http://www.genome.jp/kegg-bin/show_pathway?hsa05231/hsa:123745%09red/hsa:5159%09red/hsa:1950%09red/hsa:5296%09red/hsa:8605%09red/hsa:126969%09red/hsa:2353%09red	img/hsa05231.html
Axon guidance	KEGG PATHWAY	hsa04360	12	176	0.581668	0.920477	PLXNC1|EPHB3|SEMA3B|NTNG2|SEMA3F|PLXNA2|RND1|EFNB1|PIK3R2|ABLIM2|SEMA4A|SEMA4G	http://www.genome.jp/kegg-bin/show_pathway?hsa04360/hsa:57715%09red/hsa:5362%09red/hsa:27289%09red/hsa:5296%09red/hsa:6405%09red/hsa:64218%09red/hsa:84448%09red/hsa:1947%09red/hsa:10154%09red/hsa:2049%09red/hsa:84628%09red/hsa:7869%09red	img/hsa04360.html
Chronic myeloid leukemia	KEGG PATHWAY	hsa05220	5	73	0.586506	0.920477	MECOM|CBLC|CDKN1A|PIK3R2|STAT5A	http://www.genome.jp/kegg-bin/show_pathway?hsa05220/hsa:6776%09red/hsa:1026%09red/hsa:23624%09red/hsa:2122%09red/hsa:5296%09red	img/hsa05220.html
Thyroid hormone signaling pathway	KEGG PATHWAY	hsa04919	8	118	0.59032	0.920477	PLCB1|STAT1|THRB|CASP9|PIK3R2|DIO2|PLCD1|ATP1B1	http://www.genome.jp/kegg-bin/show_pathway?hsa04919/hsa:6772%09red/hsa:7068%09red/hsa:23236%09red/hsa:5296%09red/hsa:481%09red/hsa:842%09red/hsa:5333%09red/hsa:1734%09red	img/hsa04919.html
Dorso-ventral axis formation	KEGG PATHWAY	hsa04320	2	28	0.593197	0.920477	PIWIL4|ETV7	http://www.genome.jp/kegg-bin/show_pathway?hsa04320/hsa:51513%09red/hsa:143689%09red	img/hsa04320.html
Glyoxylate and dicarboxylate metabolism	KEGG PATHWAY	hsa00630	2	28	0.593197	0.920477	HAO1|HOGA1	http://www.genome.jp/kegg-bin/show_pathway?hsa00630/hsa:112817%09red/hsa:54363%09red	img/hsa00630.html
FoxO signaling pathway	KEGG PATHWAY	hsa04068	9	134	0.601237	0.927623	PCK1|GADD45A|CDKN1A|SLC2A4|S1PR4|IL6|TNFSF10|PIK3R2|EGF	http://www.genome.jp/kegg-bin/show_pathway?hsa04068/hsa:1647%09red/hsa:3569%09red/hsa:1026%09red/hsa:5105%09red/hsa:5296%09red/hsa:6517%09red/hsa:1950%09red/hsa:8743%09red/hsa:8698%09red	img/hsa04068.html
Alcoholism	KEGG PATHWAY	hsa05034	12	179	0.605685	0.929175	HIST1H2BD|HIST1H2AC|GRIN3B|HIST1H3B|CREB3L3|CREB3L1|HIST3H2A|HIST2H2BE|HIST1H2BN|GRIN1|HIST1H2BJ|HIST1H2BK	http://www.genome.jp/kegg-bin/show_pathway?hsa05034/hsa:8358%09red/hsa:8349%09red/hsa:116444%09red/hsa:8970%09red/hsa:8341%09red/hsa:92815%09red/hsa:3017%09red/hsa:2902%09red/hsa:90993%09red/hsa:8334%09red/hsa:85236%09red/hsa:84699%09red	img/hsa05034.html
Fatty acid biosynthesis	KEGG PATHWAY	hsa00061	1	13	0.611037	0.932091	ACSL5	http://www.genome.jp/kegg-bin/show_pathway?hsa00061/hsa:51703%09red	img/hsa00061.html
Sphingolipid signaling pathway	KEGG PATHWAY	hsa04071	8	121	0.619143	0.934025	PLCB1|DEGS2|CERS4|TRADD|S1PR4|PIK3R2|SGPP2|SPTLC3	http://www.genome.jp/kegg-bin/show_pathway?hsa04071/hsa:123099%09red/hsa:79603%09red/hsa:23236%09red/hsa:5296%09red/hsa:8717%09red/hsa:55304%09red/hsa:130367%09red/hsa:8698%09red	img/hsa04071.html
Ether lipid metabolism	KEGG PATHWAY	hsa00565	3	45	0.619224	0.934025	PLA2G4C|GAL3ST1|PLA2G4E	http://www.genome.jp/kegg-bin/show_pathway?hsa00565/hsa:8605%09red/hsa:123745%09red/hsa:9514%09red	img/hsa00565.html
VEGF signaling pathway	KEGG PATHWAY	hsa04370	4	61	0.626805	0.940208	PLA2G4C|PIK3R2|PLA2G4E|CASP9	http://www.genome.jp/kegg-bin/show_pathway?hsa04370/hsa:8605%09red/hsa:5296%09red/hsa:123745%09red/hsa:842%09red	img/hsa04370.html
Carbohydrate digestion and absorption	KEGG PATHWAY	hsa04973	3	46	0.634255	0.946126	HK2|PIK3R2|ATP1B1	http://www.genome.jp/kegg-bin/show_pathway?hsa04973/hsa:481%09red/hsa:3099%09red/hsa:5296%09red	img/hsa04973.html
Bacterial invasion of epithelial cells	KEGG PATHWAY	hsa05100	5	78	0.645862	0.952619	CDH1|CBLC|SEPT6|PIK3R2|FN1	http://www.genome.jp/kegg-bin/show_pathway?hsa05100/hsa:999%09red/hsa:23624%09red/hsa:23157%09red/hsa:5296%09red/hsa:2335%09red	img/hsa05100.html
AMPK signaling pathway	KEGG PATHWAY	hsa04152	8	124	0.64686	0.952619	CPT1C|PCK1|SLC2A4|HNF4A|PFKFB4|CREB3L3|CREB3L1|PIK3R2	http://www.genome.jp/kegg-bin/show_pathway?hsa04152/hsa:126129%09red/hsa:5105%09red/hsa:5296%09red/hsa:6517%09red/hsa:5210%09red/hsa:3172%09red/hsa:90993%09red/hsa:84699%09red	img/hsa04152.html
Mucin type O-Glycan biosynthesis	KEGG PATHWAY	hsa00512	2	31	0.649192	0.952619	GCNT4|GALNT12	http://www.genome.jp/kegg-bin/show_pathway?hsa00512/hsa:51301%09red/hsa:79695%09red	img/hsa00512.html
Circadian entrainment	KEGG PATHWAY	hsa04713	6	95	0.662378	0.958261	PLCB1|CACNA1I|NOS1|RYR1|FOS|GRIN1	http://www.genome.jp/kegg-bin/show_pathway?hsa04713/hsa:23236%09red/hsa:6261%09red/hsa:4842%09red/hsa:8911%09red/hsa:2353%09red/hsa:2902%09red	img/hsa04713.html
Fatty acid metabolism	KEGG PATHWAY	hsa01212	3	48	0.663064	0.958261	CPT1C|ACADS|ACSL5	http://www.genome.jp/kegg-bin/show_pathway?hsa01212/hsa:35%09red/hsa:126129%09red/hsa:51703%09red	img/hsa01212.html
Glycosphingolipid biosynthesis - ganglio series	KEGG PATHWAY	hsa00604	1	15	0.663684	0.958261	B3GALT4	http://www.genome.jp/kegg-bin/show_pathway?hsa00604/hsa:8705%09red	img/hsa00604.html
Glioma	KEGG PATHWAY	hsa05214	4	65	0.676598	0.969711	PDGFRB|CDKN1A|PIK3R2|EGF	http://www.genome.jp/kegg-bin/show_pathway?hsa05214/hsa:1026%09red/hsa:1950%09red/hsa:5159%09red/hsa:5296%09red	img/hsa05214.html
EGFR tyrosine kinase inhibitor resistance	KEGG PATHWAY	hsa01521	5	81	0.678798	0.969711	IL6|PDGFRB|PIK3R2|ERBB3|EGF	http://www.genome.jp/kegg-bin/show_pathway?hsa01521/hsa:3569%09red/hsa:1950%09red/hsa:2065%09red/hsa:5159%09red/hsa:5296%09red	img/hsa01521.html
Carbon metabolism	KEGG PATHWAY	hsa01200	7	113	0.686123	0.975017	ACADS|SDSL|SDS|HK2|H6PD|HAO1|ALDOC	http://www.genome.jp/kegg-bin/show_pathway?hsa01200/hsa:230%09red/hsa:35%09red/hsa:9563%09red/hsa:10993%09red/hsa:113675%09red/hsa:54363%09red/hsa:3099%09red	img/hsa01200.html
Metabolic pathways	KEGG PATHWAY	hsa01100	83	1241	0.701089	0.991068	CD38|ST3GAL3|PTGS1|IDO1|TM7SF2|CKB|AK7|BAAT|LAP3|NOS1|MAT1A|NMRK1|NOS2|P4HA3|RBKS|ACADS|PI4K2B|ALDH2|ABAT|AKR1C4|CYP4F2|UGT1A7|UGT1A1|UGT1A6|GCNT4|CERS4|AHCYL2|ALDOC|CMPK2|PRODH2|NT5C3A|TYMP|XDH|HSD3B7|HK2|GAL3ST1|TST|SPTLC3|IL4I1|ACSL5|SMPD3|BCO1|B3GALT4|PLCB1|ALDH3B1|TDO2|EXT1|HMGCL|UGT1A8|CYP2J2|ENPP1|SRR|LIPC|H6PD|PLCD1|PLA2G4C|GALNT12|ADSSL1|CYP3A7-CYP3A51P|PLA2G4E|HOGA1|DEGS2|AK8|SDSL|ADH6|…	http://www.genome.jp/kegg-bin/show_pathway?hsa01100/hsa:100861540%09red/hsa:230%09red/hsa:63826%09red/hsa:570%09red/hsa:123745%09red/hsa:9563%09red/hsa:79603%09red/hsa:3620%09red/hsa:23236%09red/hsa:6999%09red/hsa:122481%09red/hsa:2687%09red/hsa:55512%09red/hsa:54981%09red/hsa:5333%09red/hsa:6487%09red/hsa:217%09red/hsa:4143%09red/hsa:3990%09red/hsa:51301%09red/hsa:123099%09red/hsa:51251%09red/hs…	img/hsa01100.html
TGF-beta signaling pathway	KEGG PATHWAY	hsa04350	5	84	0.709629	0.997915	BMP6|ID4|FST|INHBE|INHBA	http://www.genome.jp/kegg-bin/show_pathway?hsa04350/hsa:10468%09red/hsa:83729%09red/hsa:3400%09red/hsa:654%09red/hsa:3624%09red	img/hsa04350.html
Glutathione metabolism	KEGG PATHWAY	hsa00480	3	52	0.715648	1	LAP3|GGT5|GSTK1	http://www.genome.jp/kegg-bin/show_pathway?hsa00480/hsa:51056%09red/hsa:373156%09red/hsa:2687%09red	img/hsa00480.html
Adrenergic signaling in cardiomyocytes	KEGG PATHWAY	hsa04261	9	149	0.725202	1	PLCB1|CACNA1F|ATP1B1|CREB3L3|CREB3L1|PIK3R2|AGTR1|CACNG6|TNNI3	http://www.genome.jp/kegg-bin/show_pathway?hsa04261/hsa:7137%09red/hsa:778%09red/hsa:23236%09red/hsa:5296%09red/hsa:481%09red/hsa:59285%09red/hsa:90993%09red/hsa:185%09red/hsa:84699%09red	img/hsa04261.html
Glucagon signaling pathway	KEGG PATHWAY	hsa04922	6	102	0.728248	1	PLCB1|CPT1C|PCK1|SIK1|CREB3L3|CREB3L1	http://www.genome.jp/kegg-bin/show_pathway?hsa04922/hsa:126129%09red/hsa:5105%09red/hsa:23236%09red/hsa:90993%09red/hsa:150094%09red/hsa:84699%09red	img/hsa04922.html
Pantothenate and CoA biosynthesis	KEGG PATHWAY	hsa00770	1	18	0.729622	1	ENPP1	http://www.genome.jp/kegg-bin/show_pathway?hsa00770/hsa:5167%09red	img/hsa00770.html
Inositol phosphate metabolism	KEGG PATHWAY	hsa00562	4	71	0.742278	1	PLCB1|INPP5D|PI4K2B|PLCD1	http://www.genome.jp/kegg-bin/show_pathway?hsa00562/hsa:5333%09red/hsa:23236%09red/hsa:55300%09red/hsa:3635%09red	img/hsa00562.html
GABAergic synapse	KEGG PATHWAY	hsa04727	5	88	0.747419	1	CACNA1A|CACNA1B|HAP1|CACNA1F|ABAT	http://www.genome.jp/kegg-bin/show_pathway?hsa04727/hsa:773%09red/hsa:18%09red/hsa:9001%09red/hsa:778%09red/hsa:774%09red	img/hsa04727.html
Ubiquitin mediated proteolysis	KEGG PATHWAY	hsa04120	8	137	0.752651	1	CBLC|SOCS1|BIRC7|BIRC3|UBE2L6|UBA7|FBXO2|PML	http://www.genome.jp/kegg-bin/show_pathway?hsa04120/hsa:8651%09red/hsa:330%09red/hsa:5371%09red/hsa:79444%09red/hsa:23624%09red/hsa:9246%09red/hsa:26232%09red/hsa:7318%09red	img/hsa04120.html
Hippo signaling pathway	KEGG PATHWAY	hsa04390	9	154	0.76028	1	NKD1|BMP6|ITGB2|FZD4|FZD7|TP73|CDH1|BBC3|SERPINE1	http://www.genome.jp/kegg-bin/show_pathway?hsa04390/hsa:3689%09red/hsa:654%09red/hsa:27113%09red/hsa:999%09red/hsa:7161%09red/hsa:85407%09red/hsa:8322%09red/hsa:5054%09red/hsa:8324%09red	img/hsa04390.html
Non-small cell lung cancer	KEGG PATHWAY	hsa05223	3	56	0.76166	1	EGF|PIK3R2|CASP9	http://www.genome.jp/kegg-bin/show_pathway?hsa05223/hsa:1950%09red/hsa:5296%09red/hsa:842%09red	img/hsa05223.html
Steroid biosynthesis	KEGG PATHWAY	hsa00100	1	20	0.766243	1	TM7SF2	http://www.genome.jp/kegg-bin/show_pathway?hsa00100/hsa:7108%09red	img/hsa00100.html
Glycosaminoglycan biosynthesis - chondroitin sulfate / dermatan sulfate	KEGG PATHWAY	hsa00532	1	20	0.766243	1	CHST13	http://www.genome.jp/kegg-bin/show_pathway?hsa00532/hsa:166012%09red	img/hsa00532.html
Tight junction	KEGG PATHWAY	hsa04530	8	139	0.766755	1	MYH3|ACTN2|CLDN14|CGN|CLDN23|CLDN2|CLDN4|TJP3	http://www.genome.jp/kegg-bin/show_pathway?hsa04530/hsa:9075%09red/hsa:1364%09red/hsa:57530%09red/hsa:27134%09red/hsa:137075%09red/hsa:23562%09red/hsa:4621%09red/hsa:88%09red	img/hsa04530.html
Acute myeloid leukemia	KEGG PATHWAY	hsa05221	3	57	0.772174	1	PML|STAT5A|PIK3R2	http://www.genome.jp/kegg-bin/show_pathway?hsa05221/hsa:6776%09red/hsa:5371%09red/hsa:5296%09red	img/hsa05221.html
GnRH signaling pathway	KEGG PATHWAY	hsa04912	5	91	0.773289	1	PLA2G4C|PLCB1|CACNA1F|PLA2G4E|MAP2K6	http://www.genome.jp/kegg-bin/show_pathway?hsa04912/hsa:8605%09red/hsa:778%09red/hsa:23236%09red/hsa:123745%09red/hsa:5608%09red	img/hsa04912.html
Biosynthesis of amino acids	KEGG PATHWAY	hsa01230	4	75	0.780119	1	ALDOC|SDSL|MAT1A|SDS	http://www.genome.jp/kegg-bin/show_pathway?hsa01230/hsa:4143%09red/hsa:230%09red/hsa:10993%09red/hsa:113675%09red	img/hsa01230.html
Insulin resistance	KEGG PATHWAY	hsa04931	6	109	0.784558	1	PCK1|SLC2A4|IL6|CREB3L3|CREB3L1|PIK3R2	http://www.genome.jp/kegg-bin/show_pathway?hsa04931/hsa:3569%09red/hsa:6517%09red/hsa:5296%09red/hsa:5105%09red/hsa:90993%09red/hsa:84699%09red	img/hsa04931.html
Wnt signaling pathway	KEGG PATHWAY	hsa04310	8	143	0.793212	1	NKD1|PLCB1|FZD4|SFRP5|FZD7|SERPINF1|MMP7|VANGL2	http://www.genome.jp/kegg-bin/show_pathway?hsa04310/hsa:4316%09red/hsa:57216%09red/hsa:23236%09red/hsa:6425%09red/hsa:85407%09red/hsa:8322%09red/hsa:5176%09red/hsa:8324%09red	img/hsa04310.html
Phospholipase D signaling pathway	KEGG PATHWAY	hsa04072	8	144	0.799466	1	PLCB1|PDGFRB|PIK3R2|PLA2G4C|AGTR1|LPAR6|EGF|PLA2G4E	http://www.genome.jp/kegg-bin/show_pathway?hsa04072/hsa:10161%09red/hsa:123745%09red/hsa:23236%09red/hsa:5159%09red/hsa:1950%09red/hsa:5296%09red/hsa:8605%09red/hsa:185%09red	img/hsa04072.html
Cardiac muscle contraction	KEGG PATHWAY	hsa04260	4	78	0.80551	1	TNNI3|CACNA1F|CACNG6|ATP1B1	http://www.genome.jp/kegg-bin/show_pathway?hsa04260/hsa:7137%09red/hsa:778%09red/hsa:481%09red/hsa:59285%09red	img/hsa04260.html
Biosynthesis of unsaturated fatty acids	KEGG PATHWAY	hsa01040	1	23	0.812104	1	BAAT	http://www.genome.jp/kegg-bin/show_pathway?hsa01040/hsa:570%09red	img/hsa01040.html
Ras signaling pathway	KEGG PATHWAY	hsa04014	13	228	0.818099	1	RASGRP3|PDGFRB|CSF1|PLA1A|EGF|RASAL1|NGFR|PLA2G4C|FGF11|ANGPT1|GRIN1|PLA2G4E|PIK3R2	http://www.genome.jp/kegg-bin/show_pathway?hsa04014/hsa:1435%09red/hsa:123745%09red/hsa:4804%09red/hsa:2256%09red/hsa:8437%09red/hsa:5296%09red/hsa:51365%09red/hsa:1950%09red/hsa:25780%09red/hsa:284%09red/hsa:8605%09red/hsa:5159%09red/hsa:2902%09red	img/hsa04014.html
Colorectal cancer	KEGG PATHWAY	hsa05210	3	62	0.819174	1	CASP9|PIK3R2|FOS	http://www.genome.jp/kegg-bin/show_pathway?hsa05210/hsa:2353%09red/hsa:5296%09red/hsa:842%09red	img/hsa05210.html
Vasopressin-regulated water reabsorption	KEGG PATHWAY	hsa04962	2	44	0.823931	1	CREB3L3|CREB3L1	http://www.genome.jp/kegg-bin/show_pathway?hsa04962/hsa:90993%09red/hsa:84699%09red	img/hsa04962.html
Phosphatidylinositol signaling system	KEGG PATHWAY	hsa04070	5	98	0.825718	1	PLCB1|INPP5D|PIK3R2|PI4K2B|PLCD1	http://www.genome.jp/kegg-bin/show_pathway?hsa04070/hsa:5296%09red/hsa:5333%09red/hsa:23236%09red/hsa:55300%09red/hsa:3635%09red	img/hsa04070.html
Fatty acid elongation	KEGG PATHWAY	hsa00062	1	25	0.837571	1	ELOVL3	http://www.genome.jp/kegg-bin/show_pathway?hsa00062/hsa:83401%09red	img/hsa00062.html
Melanogenesis	KEGG PATHWAY	hsa04916	5	100	0.83876	1	PLCB1|FZD7|FZD4|CREB3L1|CREB3L3	http://www.genome.jp/kegg-bin/show_pathway?hsa04916/hsa:8322%09red/hsa:8324%09red/hsa:90993%09red/hsa:23236%09red/hsa:84699%09red	img/hsa04916.html
Retrograde endocannabinoid signaling	KEGG PATHWAY	hsa04723	5	101	0.844976	1	PLCB1|CACNA1B|SLC17A7|CACNA1F|CACNA1A	http://www.genome.jp/kegg-bin/show_pathway?hsa04723/hsa:773%09red/hsa:778%09red/hsa:23236%09red/hsa:57030%09red/hsa:774%09red	img/hsa04723.html
Endocrine and other factor-regulated calcium reabsorption	KEGG PATHWAY	hsa04961	2	47	0.851113	1	PLCB1|ATP1B1	http://www.genome.jp/kegg-bin/show_pathway?hsa04961/hsa:481%09red/hsa:23236%09red	img/hsa04961.html
Notch signaling pathway	KEGG PATHWAY	hsa04330	2	48	0.859289	1	DLL1|DLL4	http://www.genome.jp/kegg-bin/show_pathway?hsa04330/hsa:28514%09red/hsa:54567%09red	img/hsa04330.html
Phototransduction	KEGG PATHWAY	hsa04744	1	27	0.859592	1	CNGB1	http://www.genome.jp/kegg-bin/show_pathway?hsa04744/hsa:1258%09red	img/hsa04744.html
Purine metabolism	KEGG PATHWAY	hsa00230	9	175	0.872981	1	NPR1|AK8|ENTPD2|NT5C3A|AK7|XDH|ADSSL1|ENPP1|GMPR	http://www.genome.jp/kegg-bin/show_pathway?hsa00230/hsa:122622%09red/hsa:2766%09red/hsa:158067%09red/hsa:51251%09red/hsa:122481%09red/hsa:954%09red/hsa:4881%09red/hsa:7498%09red/hsa:5167%09red	img/hsa00230.html
Hippo signaling pathway -multiple species	KEGG PATHWAY	hsa04392	1	29	0.878633	1	RASSF4	http://www.genome.jp/kegg-bin/show_pathway?hsa04392/hsa:83937%09red	img/hsa04392.html
Endocytosis	KEGG PATHWAY	hsa04144	14	260	0.880857	1	CBLC|ERBB3|IL2RG|HLA-C|HLA-B|HLA-A|HLA-G|NTRK1|RET|HLA-F|LDLR|HLA-E|PML|EGF	http://www.genome.jp/kegg-bin/show_pathway?hsa04144/hsa:4914%09red/hsa:3561%09red/hsa:5371%09red/hsa:3949%09red/hsa:23624%09red/hsa:3133%09red/hsa:1950%09red/hsa:2065%09red/hsa:3106%09red/hsa:3107%09red/hsa:3105%09red/hsa:5979%09red/hsa:3135%09red/hsa:3134%09red	img/hsa04144.html
Citrate cycle (TCA cycle)	KEGG PATHWAY	hsa00020	1	30	0.887164	1	PCK1	http://www.genome.jp/kegg-bin/show_pathway?hsa00020/hsa:5105%09red	img/hsa00020.html
Lysine degradation	KEGG PATHWAY	hsa00310	2	52	0.888044	1	COLGALT2|ALDH2	http://www.genome.jp/kegg-bin/show_pathway?hsa00310/hsa:23127%09red/hsa:217%09red	img/hsa00310.html
Galactose metabolism	KEGG PATHWAY	hsa00052	1	31	0.895096	1	HK2	http://www.genome.jp/kegg-bin/show_pathway?hsa00052/hsa:3099%09red	img/hsa00052.html
Circadian rhythm	KEGG PATHWAY	hsa04710	1	31	0.895096	1	RORC	http://www.genome.jp/kegg-bin/show_pathway?hsa04710/hsa:6097%09red	img/hsa04710.html
Fc gamma R-mediated phagocytosis	KEGG PATHWAY	hsa04666	4	93	0.898911	1	INPP5D|PIK3R2|PLA2G4E|FCGR2A	http://www.genome.jp/kegg-bin/show_pathway?hsa04666/hsa:2212%09red/hsa:5296%09red/hsa:3635%09red/hsa:123745%09red	img/hsa04666.html
Dopaminergic synapse	KEGG PATHWAY	hsa04728	6	130	0.900855	1	PLCB1|FOS|CACNA1A|CACNA1B|CREB3L3|CREB3L1	http://www.genome.jp/kegg-bin/show_pathway?hsa04728/hsa:773%09red/hsa:90993%09red/hsa:774%09red/hsa:23236%09red/hsa:2353%09red/hsa:84699%09red	img/hsa04728.html
Propanoate metabolism	KEGG PATHWAY	hsa00640	1	32	0.902472	1	ABAT	http://www.genome.jp/kegg-bin/show_pathway?hsa00640/hsa:18%09red	img/hsa00640.html
Basal cell carcinoma	KEGG PATHWAY	hsa05217	2	55	0.905929	1	FZD4|FZD7	http://www.genome.jp/kegg-bin/show_pathway?hsa05217/hsa:8322%09red/hsa:8324%09red	img/hsa05217.html
Base excision repair	KEGG PATHWAY	hsa03410	1	33	0.90933	1	PARP3	http://www.genome.jp/kegg-bin/show_pathway?hsa03410/hsa:10039%09red	img/hsa03410.html
Focal adhesion	KEGG PATHWAY	hsa04510	10	203	0.911507	1	PDGFRB|LAMA2|FN1|ACTN2|ITGA1|ITGA2|BIRC3|VTN|PIK3R2|EGF	http://www.genome.jp/kegg-bin/show_pathway?hsa04510/hsa:3672%09red/hsa:3673%09red/hsa:7448%09red/hsa:5296%09red/hsa:2335%09red/hsa:1950%09red/hsa:5159%09red/hsa:330%09red/hsa:88%09red/hsa:3908%09red	img/hsa04510.html
Pancreatic secretion	KEGG PATHWAY	hsa04972	4	96	0.911953	1	CD38|PLCB1|ATP1B1|ATP2A3	http://www.genome.jp/kegg-bin/show_pathway?hsa04972/hsa:481%09red/hsa:489%09red/hsa:23236%09red/hsa:952%09red	img/hsa04972.html
SNARE interactions in vesicular transport	KEGG PATHWAY	hsa04130	1	34	0.915707	1	STX19	http://www.genome.jp/kegg-bin/show_pathway?hsa04130/hsa:415117%09red	img/hsa04130.html
Glycerolipid metabolism	KEGG PATHWAY	hsa00561	2	59	0.925645	1	LIPC|ALDH2	http://www.genome.jp/kegg-bin/show_pathway?hsa00561/hsa:3990%09red/hsa:217%09red	img/hsa00561.html
Insulin signaling pathway	KEGG PATHWAY	hsa04910	6	139	0.931129	1	CBLC|PCK1|SOCS1|HK2|SLC2A4|PIK3R2	http://www.genome.jp/kegg-bin/show_pathway?hsa04910/hsa:8651%09red/hsa:23624%09red/hsa:6517%09red/hsa:5296%09red/hsa:5105%09red/hsa:3099%09red	img/hsa04910.html
Huntington's disease	KEGG PATHWAY	hsa05016	9	193	0.931358	1	PLCB1|TGM2|DNAH17|HAP1|CASP9|CREB3L3|CREB3L1|BBC3|GRIN1	http://www.genome.jp/kegg-bin/show_pathway?hsa05016/hsa:2902%09red/hsa:842%09red/hsa:23236%09red/hsa:27113%09red/hsa:9001%09red/hsa:7052%09red/hsa:8632%09red/hsa:90993%09red/hsa:84699%09red	img/hsa05016.html
Taste transduction	KEGG PATHWAY	hsa04742	3	83	0.936849	1	CACNA1A|SCNN1B|ENTPD2	http://www.genome.jp/kegg-bin/show_pathway?hsa04742/hsa:773%09red/hsa:954%09red/hsa:6338%09red	img/hsa04742.html
Ribosome biogenesis in eukaryotes	KEGG PATHWAY	hsa03008	3	84	0.940098	1	SNORD3A|RMRP|XRN1	http://www.genome.jp/kegg-bin/show_pathway?hsa03008/hsa:54464%09red/hsa:6023%09red/hsa:780851%09red	img/hsa03008.html
T cell receptor signaling pathway	KEGG PATHWAY	hsa04660	4	105	0.942552	1	CBLC|CARD11|PIK3R2|FOS	http://www.genome.jp/kegg-bin/show_pathway?hsa04660/hsa:84433%09red/hsa:2353%09red/hsa:23624%09red/hsa:5296%09red	img/hsa04660.html
Long-term potentiation	KEGG PATHWAY	hsa04720	2	66	0.951107	1	PLCB1|GRIN1	http://www.genome.jp/kegg-bin/show_pathway?hsa04720/hsa:23236%09red/hsa:2902%09red	img/hsa04720.html
Gap junction	KEGG PATHWAY	hsa04540	3	88	0.951606	1	PLCB1|EGF|PDGFRB	http://www.genome.jp/kegg-bin/show_pathway?hsa04540/hsa:1950%09red/hsa:23236%09red/hsa:5159%09red	img/hsa04540.html
Alzheimer's disease	KEGG PATHWAY	hsa05010	7	168	0.95531	1	PLCB1|NOS1|FAS|ATP2A3|CACNA1F|CASP9|GRIN1	http://www.genome.jp/kegg-bin/show_pathway?hsa05010/hsa:778%09red/hsa:23236%09red/hsa:355%09red/hsa:842%09red/hsa:4842%09red/hsa:489%09red/hsa:2902%09red	img/hsa05010.html
Epithelial cell signaling in Helicobacter pylori infection	KEGG PATHWAY	hsa05120	2	68	0.956695	1	TCIRG1|CCL5	http://www.genome.jp/kegg-bin/show_pathway?hsa05120/hsa:10312%09red/hsa:6352%09red	img/hsa05120.html
Longevity regulating pathway	KEGG PATHWAY	hsa04211	3	94	0.965063	1	CREB3L3|CREB3L1|PIK3R2	http://www.genome.jp/kegg-bin/show_pathway?hsa04211/hsa:90993%09red/hsa:5296%09red/hsa:84699%09red	img/hsa04211.html
Glycerophospholipid metabolism	KEGG PATHWAY	hsa00564	3	95	0.966931	1	PLA2G4C|GPD1|PLA2G4E	http://www.genome.jp/kegg-bin/show_pathway?hsa00564/hsa:8605%09red/hsa:2819%09red/hsa:123745%09red	img/hsa00564.html
Amino sugar and nucleotide sugar metabolism	KEGG PATHWAY	hsa00520	1	48	0.969668	1	HK2	http://www.genome.jp/kegg-bin/show_pathway?hsa00520/hsa:3099%09red	img/hsa00520.html
Adherens junction	KEGG PATHWAY	hsa04520	2	74	0.970024	1	CDH1|ACTN2	http://www.genome.jp/kegg-bin/show_pathway?hsa04520/hsa:999%09red/hsa:88%09red	img/hsa04520.html
Neurotrophin signaling pathway	KEGG PATHWAY	hsa04722	4	120	0.972819	1	NGFR|PIK3R2|TP73|NTRK1	http://www.genome.jp/kegg-bin/show_pathway?hsa04722/hsa:4914%09red/hsa:7161%09red/hsa:4804%09red/hsa:5296%09red	img/hsa04722.html
Vibrio cholerae infection	KEGG PATHWAY	hsa05110	1	51	0.975641	1	TCIRG1	http://www.genome.jp/kegg-bin/show_pathway?hsa05110/hsa:10312%09red	img/hsa05110.html
Pyrimidine metabolism	KEGG PATHWAY	hsa00240	3	105	0.981085	1	CMPK2|NT5C3A|TYMP	http://www.genome.jp/kegg-bin/show_pathway?hsa00240/hsa:51251%09red/hsa:1890%09red/hsa:129607%09red	img/hsa00240.html
Pathogenic Escherichia coli infection	KEGG PATHWAY	hsa05130	1	55	0.981819	1	CDH1	http://www.genome.jp/kegg-bin/show_pathway?hsa05130/hsa:999%09red	img/hsa05130.html
Morphine addiction	KEGG PATHWAY	hsa05032	2	91	0.9897	1	CACNA1A|CACNA1B	http://www.genome.jp/kegg-bin/show_pathway?hsa05032/hsa:773%09red/hsa:774%09red	img/hsa05032.html
Longevity regulating pathway - multiple species	KEGG PATHWAY	hsa04213	1	64	0.990593	1	PIK3R2	http://www.genome.jp/kegg-bin/show_pathway?hsa04213/hsa:5296%09red	img/hsa04213.html
Parkinson's disease	KEGG PATHWAY	hsa05012	4	142	0.991525	1	UBE2L6|UBA7|GPR37|CASP9	http://www.genome.jp/kegg-bin/show_pathway?hsa05012/hsa:842%09red/hsa:7318%09red/hsa:9246%09red/hsa:2861%09red	img/hsa05012.html
Aminoacyl-tRNA biosynthesis	KEGG PATHWAY	hsa00970	1	66	0.991875	1	WARS	http://www.genome.jp/kegg-bin/show_pathway?hsa00970/hsa:7453%09red	img/hsa00970.html
Renal cell carcinoma	KEGG PATHWAY	hsa05211	1	67	0.992449	1	PIK3R2	http://www.genome.jp/kegg-bin/show_pathway?hsa05211/hsa:5296%09red	img/hsa05211.html
Non-alcoholic fatty liver disease (NAFLD)	KEGG PATHWAY	hsa04932	4	151	0.994839	1	IL6|FAS|PIK3R2|XBP1	http://www.genome.jp/kegg-bin/show_pathway?hsa04932/hsa:7494%09red/hsa:3569%09red/hsa:355%09red/hsa:5296%09red	img/hsa04932.html
Oxidative phosphorylation	KEGG PATHWAY	hsa00190	3	133	0.996322	1	TCIRG1|LHPP|ATP4A	http://www.genome.jp/kegg-bin/show_pathway?hsa00190/hsa:64077%09red/hsa:10312%09red/hsa:495%09red	img/hsa00190.html
RNA degradation	KEGG PATHWAY	hsa03018	1	77	0.996374	1	XRN1	http://www.genome.jp/kegg-bin/show_pathway?hsa03018/hsa:54464%09red	img/hsa03018.html
Protein processing in endoplasmic reticulum	KEGG PATHWAY	hsa04141	4	166	0.997788	1	FBXO2|RRBP1|FBXO6|XBP1	http://www.genome.jp/kegg-bin/show_pathway?hsa04141/hsa:26270%09red/hsa:7494%09red/hsa:26232%09red/hsa:6238%09red	img/hsa04141.html
Cell cycle	KEGG PATHWAY	hsa04110	2	124	0.998804	1	GADD45A|CDKN1A	http://www.genome.jp/kegg-bin/show_pathway?hsa04110/hsa:1647%09red/hsa:1026%09red	img/hsa04110.html
mTOR signaling pathway	KEGG PATHWAY	hsa04150	3	154	0.998981	1	FZD4|PIK3R2|FZD7	http://www.genome.jp/kegg-bin/show_pathway?hsa04150/hsa:8322%09red/hsa:5296%09red/hsa:8324%09red	img/hsa04150.html
Progesterone-mediated oocyte maturation	KEGG PATHWAY	hsa04914	1	98	0.999225	1	PIK3R2	http://www.genome.jp/kegg-bin/show_pathway?hsa04914/hsa:5296%09red	img/hsa04914.html
MicroRNAs in cancer	KEGG PATHWAY	hsa05206	9	299	0.9993	1	TP63|SOCS1|ERBB3|PDGFRB|CDKN1A|ST14|PIK3R2|MMP9|TIMP3	http://www.genome.jp/kegg-bin/show_pathway?hsa05206/hsa:1026%09red/hsa:8651%09red/hsa:4318%09red/hsa:7078%09red/hsa:5296%09red/hsa:6768%09red/hsa:2065%09red/hsa:8626%09red/hsa:5159%09red	img/hsa05206.html
RNA transport	KEGG PATHWAY	hsa03013	1	172	0.999997	1	SNORD3A	http://www.genome.jp/kegg-bin/show_pathway?hsa03013/hsa:780851%09red	img/hsa03013.html
Olfactory transduction	KEGG PATHWAY	hsa04740	4	417	1	1	CNGB1|SLC8A2|ANO2|NCALD	http://www.genome.jp/kegg-bin/show_pathway?hsa04740/hsa:1258%09red/hsa:6543%09red/hsa:83988%09red/hsa:57101%09red	img/hsa04740.html
