# Supplementary material for: RNA-binding protein CELF6 modulates transcription and splicing levels of genes associated with tumorigenesis in lung cancer A549 cells
Source: PeerJ. 2022 Jul 26;10:e13800. doi: 10.7717/peerj.13800 (PMC9336609; doi:10.7717/peerj.13800)
Supplement: Supplemental Information 11 [file peerj-10-13800-s011.xlsx]

## Sheet: Sheet1
Sample	CELF6_1st	CELF6_2nd	CELF6_3rd	Ctrl_1st	Ctrl_2nd	Ctrl_3rd	Total
Total Uniquely mapped reads	70355255	71813876	68419545	73390283	76545973	76480652
All_Junction	180462	185521	181496	188321	185488	186654	325300
Novel_Junction	50996	53917	51411	53685	53088	54270	162218
Novel_Junction(100%)	0.282586	0.290625	0.283262	0.285072	0.286207	0.290752	0.498672
Known_Junction	129466	131604	130085	134636	132400	132384	163082
Detected_exon	205283	207220	205407	210428	208146	208058	249163
Annotated Exon	367321	367321	367321	367321	367321	367321	367321
Ratio	0.5589	0.5641	0.5592	0.5729	0.5667	0.5664	0.6783
knownAS(KAS)	11593	11986	11575	11984	11922	11912	17691
novel AS(NAS)	16318	16900	16597	16178	16456	16666	49565
AllAS	27911	28886	28172	28162	28378	28578	67256
KAS%	0.4154	0.4149	0.4109	0.4255	0.4201	0.4168	0.263
NAS%	0.5846	0.5851	0.5891	0.5745	0.5799	0.5832	0.737
