# Supplementary material for: RNA-binding protein CELF6 modulates transcription and splicing levels of genes associated with tumorigenesis in lung cancer A549 cells
Source: PeerJ. 2022 Jul 26;10:e13800. doi: 10.7717/peerj.13800 (PMC9336609; doi:10.7717/peerj.13800)
Supplement: Supplemental Information 12 [file peerj-10-13800-s012.xls]

## Sheet: Classification_of_all_RASE_even
Sample	Type	3pMXE	5pMXE	A3SS	A3SS&ES	A5SS	A5SS&ES	ES	IntronR	MXE	cassetteExon	Total
CELF6_vs_Ctrl	Up	17	32	152	20	138	24	137	250	29	52	851
CELF6_vs_Ctrl	Down	30	26	136	13	165	10	60	112	26	80	658
Total		47	58	288	33	303	34	197	362	55	132	1509
Classification_of_all_RASE_events
